# Supplementary material
Source: publisher figshare collection journal article supplement (https://gsajournals.figshare.com/ndownloader/files/34323917)
Supplement: Supplementary file 1 [file 34323917]

## Sheet: Z_tritici_E-MTAB-447
Transcript ID	baseMean	log2FoldChange	lfcSE	stat	pvalue	padj	Factor
TraesCS1A02G001800.1	1970.520558	-3.231372055	0.876561052	-3.686419842	0.000227431	0.013204967	cv Sevin Septoria tritici 13 days
TraesCS1A02G001900.6	18.69423873	-19.6645176	5.442827834	-3.612922951	0.000302765	0.015746126	cv Sevin Septoria tritici 13 days
TraesCS1A02G030000.1	479.6436327	-3.863760533	0.640521037	-6.03221488	1.61728E-09	1.22322E-06	cv Sevin Septoria tritici 13 days
TraesCS1A02G030400.1	71.35011789	-4.088989584	0.825398109	-4.953960448	7.2718E-07	0.000169753	cv Sevin Septoria tritici 13 days
TraesCS1A02G033500.1	219.6338776	-5.032094945	1.357624914	-3.706542869	0.000210108	0.012480177	cv Sevin Septoria tritici 13 days
TraesCS1A02G036200.1	324.5938729	-1.596694545	0.500573161	-3.189732627	0.001424045	0.043712318	cv Sevin Septoria tritici 13 days
TraesCS1A02G055400.2	297.0645769	-11.03758729	2.542328038	-4.341527576	1.41496E-05	0.016539491	cv Sevin Septoria tritici 10 days
TraesCS1A02G056200.1	274.0636399	-3.228516546	0.548518855	-5.88588071	3.9594E-09	2.58162E-06	cv Sevin Septoria tritici 13 days
TraesCS1A02G057200.1	92.46350027	-5.190516886	1.13617854	-4.568398982	4.91464E-06	0.000829726	cv Sevin Septoria tritici 13 days
TraesCS1A02G057200.2	337.2516909	-4.958088861	0.736000846	-6.736526034	1.62218E-11	3.06733E-08	cv Sevin Septoria tritici 13 days
TraesCS1A02G058400.1	561.1334166	-2.242882191	0.603472242	-3.716628597	0.000201899	0.012110588	cv Sevin Septoria tritici 13 days
TraesCS1A02G058400.2	271.9153292	-2.845016855	0.495583702	-5.740739337	9.42641E-09	5.06259E-06	cv Sevin Septoria tritici 13 days
TraesCS1A02G058900.2	80.1946862	-2.786154135	0.648770504	-4.294514186	1.75076E-05	0.00223177	cv Sevin Septoria tritici 13 days
TraesCS1A02G067300.3	32.23465076	-7.642519639	2.250534237	-3.395869085	0.000684111	0.026911834	cv Sevin Septoria tritici 13 days
TraesCS1A02G068300.1	13.8281064	-19.93297244	3.469589147	-5.745052683	9.18924E-09	1.94978E-05	cv Sevin Septoria tritici 4 days
TraesCS1A02G069900.1	167.7971336	-2.536083413	0.592729195	-4.278654459	1.88026E-05	0.002347507	cv Sevin Septoria tritici 13 days
TraesCS1A02G107600.1	50.79865774	-8.401436419	1.564371838	-5.370485594	7.85249E-08	0.000107457	cv Sevin Septoria tritici 4 days
TraesCS1A02G108300.2	13.11503155	-22.60828681	4.208379957	-5.372206655	7.77789E-08	0.000107457	cv Sevin Septoria tritici 4 days
TraesCS1A02G108300.2	13.11503155	-19.49872748	5.495223306	-3.548304845	0.000387719	0.018525438	cv Sevin Septoria tritici 13 days
TraesCS1A02G120800.1	103.3081141	-1.755436866	0.477756325	-3.674335165	0.00023847	0.013622782	cv Sevin Septoria tritici 13 days
TraesCS1A02G132600.3	160.8156707	-10.00667987	2.128433731	-4.701428906	2.58347E-06	0.007999481	cv Sevin Septoria tritici 10 days
TraesCS1A02G136800.3	116.0950277	-9.4936163	2.255626613	-4.208859856	2.56663E-05	0.00292075	cv Sevin Septoria tritici 13 days
TraesCS1A02G137000.1	51.10779825	-8.398242206	2.170095228	-3.869987868	0.000108841	0.008047226	cv Sevin Septoria tritici 13 days
TraesCS1A02G144000.2	21.74424628	-19.34210339	4.715785052	-4.101565947	4.10364E-05	0.031386223	cv Sevin Septoria tritici 10 days
TraesCS1A02G144800.1	333.1493439	-4.19010995	1.110647751	-3.772672249	0.000161508	0.010561381	cv Sevin Septoria tritici 13 days
TraesCS1A02G156500.1	20.41284126	-6.699175206	1.627648356	-4.115861502	3.85736E-05	0.016120296	cv Sevin Septoria tritici 4 days
TraesCS1A02G163400.2	101.8183461	-3.310174897	0.885875255	-3.736615146	0.000186514	0.011565129	cv Sevin Septoria tritici 13 days
TraesCS1A02G165700.1	252.1710292	-1.85051818	0.533628664	-3.467801307	0.000524735	0.02256719	cv Sevin Septoria tritici 13 days
TraesCS1A02G165700.2	751.6895313	-1.716533393	0.507786832	-3.380421241	0.000723748	0.02810216	cv Sevin Septoria tritici 13 days
TraesCS1A02G168400.1	93.81878465	-5.094573946	1.157633614	-4.400851777	1.07827E-05	0.001532978	cv Sevin Septoria tritici 13 days
TraesCS1A02G176700.2	25.2430375	-7.610805509	1.589599114	-4.787877296	1.68555E-06	0.0009803	cv Sevin Septoria tritici 4 days
TraesCS1A02G176700.2	25.2430375	-7.778774678	2.212670997	-3.515558657	0.00043883	0.020075048	cv Sevin Septoria tritici 13 days
TraesCS1A02G207700.2	37.26778629	-8.439978234	2.56537514	-3.289958689	0.001002021	0.034528575	cv Sevin Septoria tritici 13 days
TraesCS1A02G245500.4	48.22983135	-5.516945027	1.707627766	-3.230765591	0.001234591	0.039566912	cv Sevin Septoria tritici 13 days
TraesCS1A02G250100.1	55.34172976	-2.874786893	0.722401593	-3.979485816	6.90645E-05	0.005864898	cv Sevin Septoria tritici 13 days
TraesCS1A02G251200.1	956.3453289	-1.60977624	0.387966913	-4.149261665	3.33549E-05	0.003583508	cv Sevin Septoria tritici 13 days
TraesCS1A02G252700.2	48.91962958	-2.889830355	0.804635384	-3.591478094	0.000328808	0.016492411	cv Sevin Septoria tritici 13 days
TraesCS1A02G259700.1	518.461604	-2.920970888	0.874474317	-3.340259204	0.000837002	0.030600591	cv Sevin Septoria tritici 13 days
TraesCS1A02G260300.3	62.03169637	-2.976502304	0.851063265	-3.497392526	0.00046983	0.020946539	cv Sevin Septoria tritici 13 days
TraesCS1A02G279500.3	126.2036002	-5.277896786	1.417717442	-3.722812904	0.000197016	0.011988082	cv Sevin Septoria tritici 13 days
TraesCS1A02G281700.1	193.0445582	-3.466687161	0.98870491	-3.506291033	0.000454398	0.020555172	cv Sevin Septoria tritici 13 days
TraesCS1A02G292100.1	52.70700895	-8.575563273	2.156514343	-3.976585317	6.99119E-05	0.005927988	cv Sevin Septoria tritici 13 days
TraesCS1A02G295200.1	229.8904231	-1.954284778	0.620390527	-3.150088037	0.001632213	0.047505848	cv Sevin Septoria tritici 13 days
TraesCS1A02G305500.2	48.97459012	-8.476375873	2.280882941	-3.716269573	0.000202186	0.012111083	cv Sevin Septoria tritici 13 days
TraesCS1A02G308500.1	225.1988481	-1.960848113	0.590504516	-3.320631866	0.000898139	0.032022529	cv Sevin Septoria tritici 13 days
TraesCS1A02G309200.3	86.22450636	-2.460405445	0.6285575	-3.914368131	9.06413E-05	0.049401061	cv Sevin Septoria tritici 10 days
TraesCS1A02G335800.1	162.0470524	-10.06115669	2.229851679	-4.512029561	6.42102E-06	0.001037718	cv Sevin Septoria tritici 13 days
TraesCS1A02G357400.1	66.30560664	-6.377350344	1.697923118	-3.755971207	0.000172671	0.010942458	cv Sevin Septoria tritici 13 days
TraesCS1A02G370800.1	8.628310229	-20.20512725	4.209590931	-4.799784013	1.58837E-06	0.000972402	cv Sevin Septoria tritici 4 days
TraesCS1A02G376400.1	679.6773859	-4.348310491	1.361906442	-3.192811456	0.001408949	0.043389819	cv Sevin Septoria tritici 13 days
TraesCS1A02G400500.1	715.6046802	-5.39571083	1.527082241	-3.53334659	0.000410334	0.019094844	cv Sevin Septoria tritici 13 days
TraesCS1A02G402100.1	249.0534961	-3.985033892	1.242357189	-3.20763942	0.001338292	0.041730297	cv Sevin Septoria tritici 13 days
TraesCS1A02G403800.1	139.0179078	-5.132260572	1.325152136	-3.872959513	0.000107522	0.007983345	cv Sevin Septoria tritici 13 days
TraesCS1A02G418800.1	1728.132195	-1.382211266	0.408216917	-3.385972523	0.000709265	0.027792339	cv Sevin Septoria tritici 13 days
TraesCS1A02G425100.2	14.30871871	-19.51371008	4.926959292	-3.960599006	7.4762E-05	0.043286492	cv Sevin Septoria tritici 10 days
TraesCS1B02G000600.1	1703.418014	-3.139588374	0.960866907	-3.267453953	0.001085195	0.0362537	cv Sevin Septoria tritici 13 days
TraesCS1B02G050600.1	87.50107525	-2.959605109	0.874133073	-3.38576036	0.000709813	0.027792339	cv Sevin Septoria tritici 13 days
TraesCS1B02G059900.1	41.69925897	-2.919150295	0.727789604	-4.010981031	6.0467E-05	0.005401652	cv Sevin Septoria tritici 13 days
TraesCS1B02G075200.1	770.2345036	-4.188211946	0.563910607	-7.427084883	1.11017E-13	3.93597E-10	cv Sevin Septoria tritici 13 days
TraesCS1B02G077300.2	77.30370481	-2.977522764	0.671418338	-4.434675959	9.22109E-06	0.001358637	cv Sevin Septoria tritici 13 days
TraesCS1B02G083900.5	22.84188145	-7.594452426	1.637220384	-4.638625625	3.50734E-06	0.001854398	cv Sevin Septoria tritici 4 days
TraesCS1B02G084700.1	336.9698841	-2.050899007	0.634034507	-3.234680422	0.00121779	0.039227898	cv Sevin Septoria tritici 13 days
TraesCS1B02G122000.2	215.1579591	-10.08008741	2.463861893	-4.091173875	4.29195E-05	0.004226827	cv Sevin Septoria tritici 13 days
TraesCS1B02G122000.4	37.56931696	-20.32593495	4.209100346	-4.829044992	1.37189E-06	0.000920633	cv Sevin Septoria tritici 4 days
TraesCS1B02G124900.3	13.57520809	-20.68330508	4.208300992	-4.914882542	8.88357E-07	0.000765424	cv Sevin Septoria tritici 4 days
TraesCS1B02G124900.3	13.57520809	-19.9653946	5.495162836	-3.633267147	0.000279855	0.0151191	cv Sevin Septoria tritici 13 days
TraesCS1B02G140400.1	12.11000045	-6.598494711	1.673753243	-3.942334235	8.06924E-05	0.030115533	cv Sevin Septoria tritici 4 days
TraesCS1B02G162100.1	275.0685856	-10.76842852	2.552510359	-4.218759968	2.4565E-05	0.0228567	cv Sevin Septoria tritici 10 days
TraesCS1B02G162100.1	275.0685856	-10.6691341	2.552510359	-4.179859276	2.9169E-05	0.003232314	cv Sevin Septoria tritici 13 days
TraesCS1B02G170100.1	190.0296794	-10.77910152	2.361275694	-4.564948322	4.99617E-06	0.0008385	cv Sevin Septoria tritici 13 days
TraesCS1B02G176100.2	19.72185216	-7.248071172	2.186198492	-3.315376531	0.000915198	0.032467479	cv Sevin Septoria tritici 13 days
TraesCS1B02G177400.3	22.58000744	-21.42676213	4.207403474	-5.092633084	3.53125E-07	0.000400735	cv Sevin Septoria tritici 4 days
TraesCS1B02G177400.3	22.58000744	-20.63575361	5.494475564	-3.755727616	0.000172839	0.010942458	cv Sevin Septoria tritici 13 days
TraesCS1B02G182400.1	524.2498533	-1.817701512	0.465022396	-3.908847246	9.27376E-05	0.007236082	cv Sevin Septoria tritici 13 days
TraesCS1B02G186300.1	1806.473953	-2.362847045	0.701579816	-3.367894846	0.000757445	0.028801572	cv Sevin Septoria tritici 13 days
TraesCS1B02G191600.1	644.8405866	-3.360380931	1.044052858	-3.218592724	0.001288213	0.040755816	cv Sevin Septoria tritici 13 days
TraesCS1B02G193700.3	8.513266092	-20.16225698	4.209638876	-4.78954551	1.67159E-06	0.0009803	cv Sevin Septoria tritici 4 days
TraesCS1B02G200600.1	96.10785568	-7.153298547	1.575780062	-4.539528529	5.63802E-06	0.000932426	cv Sevin Septoria tritici 13 days
TraesCS1B02G237000.2	19.50573954	-21.21809863	4.207617057	-5.042782731	4.5881E-07	0.000478465	cv Sevin Septoria tritici 4 days
TraesCS1B02G237000.2	19.50573954	-20.462196	5.494639109	-3.724029113	0.000196068	0.011946477	cv Sevin Septoria tritici 13 days
TraesCS1B02G254000.1	2234.550761	-2.163585349	0.47829102	-4.523575096	6.08037E-06	0.000999754	cv Sevin Septoria tritici 13 days
TraesCS1B02G256500.2	53.20914852	-3.35073217	0.948940335	-3.531025131	0.000413952	0.019242463	cv Sevin Septoria tritici 13 days
TraesCS1B02G261800.1	927.063331	-1.776407703	0.445056264	-3.991422765	6.56781E-05	0.005714194	cv Sevin Septoria tritici 13 days
TraesCS1B02G268400.1	173.2350713	-5.224643713	1.617657896	-3.229758112	0.00123895	0.039684174	cv Sevin Septoria tritici 13 days
TraesCS1B02G326700.2	26.28288601	-7.763762821	2.24441819	-3.45914271	0.000541898	0.023008749	cv Sevin Septoria tritici 13 days
TraesCS1B02G342200.2	14.03538464	-20.23049591	4.208227521	-4.807367428	1.52931E-06	0.000952963	cv Sevin Septoria tritici 4 days
TraesCS1B02G342200.2	14.03538464	-19.90756677	5.495106573	-3.622780834	0.000291453	0.015473892	cv Sevin Septoria tritici 13 days
TraesCS1B02G344300.1	130.7075495	-1.815915221	0.463743657	-3.915773711	9.01147E-05	0.007080123	cv Sevin Septoria tritici 13 days
TraesCS1B02G349100.1	121.4918058	-4.217339927	1.148137712	-3.673200421	0.000239531	0.013655941	cv Sevin Septoria tritici 13 days
TraesCS1B02G368500.1	222.792663	-2.522984541	0.774106698	-3.259220658	0.001117187	0.03695252	cv Sevin Septoria tritici 13 days
TraesCS1B02G376800.1	99.40905099	-9.414989704	2.488930378	-3.782745305	0.000155108	0.010339204	cv Sevin Septoria tritici 13 days
TraesCS1B02G388700.1	228.7139031	-4.663662226	1.275871002	-3.655277232	0.000256904	0.014273406	cv Sevin Septoria tritici 13 days
TraesCS1B02G388700.2	3680.545739	-4.756165903	1.415878868	-3.359161585	0.000781793	0.029330696	cv Sevin Septoria tritici 13 days
TraesCS1B02G433300.1	227.860641	-6.846104181	1.28606898	-5.323279146	1.01913E-07	3.34169E-05	cv Sevin Septoria tritici 13 days
TraesCS1B02G436700.1	520.7069957	-6.865835838	1.696155817	-4.04788037	5.16835E-05	0.004860703	cv Sevin Septoria tritici 13 days
TraesCS1B02G440200.1	104.4720752	-4.660616276	1.300332502	-3.584172717	0.000338148	0.016885387	cv Sevin Septoria tritici 13 days
TraesCS1B02G451100.1	1014.00702	-3.405642085	0.556007867	-6.125168882	9.05875E-10	8.28817E-07	cv Sevin Septoria tritici 13 days
TraesCS1B02G451200.1	1743.728905	-2.688066366	0.701399909	-3.832430444	0.000126883	0.008952229	cv Sevin Septoria tritici 13 days
TraesCS1B02G465100.2	30.82315476	-8.348698952	2.652118788	-3.147935527	0.00164428	0.047772513	cv Sevin Septoria tritici 13 days
TraesCS1D02G000800.2	235.5771961	-5.798014896	1.345405783	-4.309491581	1.6363E-05	0.002119199	cv Sevin Septoria tritici 13 days
TraesCS1D02G030500.1	364.5906663	-3.311502715	0.79226019	-4.179817132	2.91744E-05	0.003232314	cv Sevin Septoria tritici 13 days
TraesCS1D02G030600.1	413.5523393	-3.596809523	1.055815973	-3.406663295	0.000657622	0.026215225	cv Sevin Septoria tritici 13 days
TraesCS1D02G037900.1	243.1750418	-1.307746004	0.416045622	-3.143275487	0.001670685	0.048182954	cv Sevin Septoria tritici 13 days
TraesCS1D02G058300.1	363.3866058	-3.606974068	0.506353169	-7.123435358	1.0527E-12	2.84358E-09	cv Sevin Septoria tritici 13 days
TraesCS1D02G058300.2	167.470359	-4.362969042	0.790388125	-5.520033646	3.38935E-08	1.35397E-05	cv Sevin Septoria tritici 13 days
TraesCS1D02G102500.2	366.2131278	-2.904525273	0.587850409	-4.940925839	7.77525E-07	0.000179292	cv Sevin Septoria tritici 13 days
TraesCS1D02G102500.3	92.12581361	-22.21062485	5.187728336	-4.281377784	1.8574E-05	0.002331034	cv Sevin Septoria tritici 13 days
TraesCS1D02G104200.2	52.86476757	-19.98425193	5.49509233	-3.636745431	0.000276105	0.015004494	cv Sevin Septoria tritici 13 days
TraesCS1D02G111300.1	133.4957298	-1.994702791	0.511901443	-3.896653971	9.75308E-05	0.007496657	cv Sevin Septoria tritici 13 days
TraesCS1D02G113900.1	20.95253275	-7.067604598	2.22325597	-3.178943267	0.00147813	0.044862714	cv Sevin Septoria tritici 13 days
TraesCS1D02G138100.3	15.03484367	-19.13892928	5.496592964	-3.481962264	0.000497754	0.021753146	cv Sevin Septoria tritici 13 days
TraesCS1D02G143900.1	255.7362395	-4.701622533	1.294645944	-3.631589435	0.000281681	0.015174394	cv Sevin Septoria tritici 13 days
TraesCS1D02G145900.4	16.76135415	-19.43080089	4.800771132	-4.047433289	5.17823E-05	0.004860703	cv Sevin Septoria tritici 13 days
TraesCS1D02G149700.1	221.7341865	-4.72630954	1.222331338	-3.866635332	0.000110347	0.008129296	cv Sevin Septoria tritici 13 days
TraesCS1D02G149800.1	1397.718391	-4.326423231	0.973338477	-4.444931885	8.79197E-06	0.001305585	cv Sevin Septoria tritici 13 days
TraesCS1D02G155200.2	11.08372832	-25.39955193	4.168557461	-6.093127459	1.10726E-09	8.13425E-06	cv Sevin Septoria tritici 4 days
TraesCS1D02G161000.3	51.05288451	-19.75010573	5.495425541	-3.593917447	0.000325743	0.016410393	cv Sevin Septoria tritici 13 days
TraesCS1D02G168700.1	1230.173466	-2.752818276	0.67864912	-4.056320412	4.98519E-05	0.004745881	cv Sevin Septoria tritici 13 days
TraesCS1D02G175000.2	458.1361952	-1.716192672	0.465818771	-3.684249711	0.000229377	0.013304352	cv Sevin Septoria tritici 13 days
TraesCS1D02G176000.1	87.35721976	-2.913248333	0.727079721	-4.00677979	6.15522E-05	0.005445201	cv Sevin Septoria tritici 13 days
TraesCS1D02G184100.3	82.8759958	-2.592888596	0.598784962	-4.33025002	1.4894E-05	0.016776617	cv Sevin Septoria tritici 10 days
TraesCS1D02G192800.4	53.02896573	-8.907092723	2.136450236	-4.169108446	3.05793E-05	0.025660554	cv Sevin Septoria tritici 10 days
TraesCS1D02G192800.4	53.02896573	-8.807798148	2.136450236	-4.122632019	3.74568E-05	0.003854313	cv Sevin Septoria tritici 13 days
TraesCS1D02G199100.1	687.3584197	-2.769764691	0.77720301	-3.563759605	0.000365581	0.01784676	cv Sevin Septoria tritici 13 days
TraesCS1D02G203500.1	558.1513687	-1.8908852	0.493242337	-3.833582514	0.00012629	0.008943758	cv Sevin Septoria tritici 13 days
TraesCS1D02G222700.3	90.70155696	-7.901152181	1.56459161	-5.049977341	4.41862E-07	0.000474431	cv Sevin Septoria tritici 4 days
TraesCS1D02G222700.3	90.70155696	-3.484095588	0.885382531	-3.935130257	8.31516E-05	0.006757123	cv Sevin Septoria tritici 13 days
TraesCS1D02G235800.2	9.163770251	-20.22095532	4.209386576	-4.803777213	1.557E-06	0.000961634	cv Sevin Septoria tritici 4 days
TraesCS1D02G235800.2	9.163770251	-19.42241645	5.4959942	-3.533922297	0.000409441	0.019084613	cv Sevin Septoria tritici 13 days
TraesCS1D02G237500.1	67.8986388	-3.529736144	0.804053012	-4.389929635	1.13387E-05	0.005311018	cv Sevin Septoria tritici 4 days
TraesCS1D02G239200.1	168.7121288	-1.799471456	0.525726152	-3.422830399	0.000619727	0.025200467	cv Sevin Septoria tritici 13 days
TraesCS1D02G240700.3	7.477868865	-20.41375764	4.210135265	-4.848717763	1.24262E-06	0.00089059	cv Sevin Septoria tritici 4 days
TraesCS1D02G242500.1	2189.697638	-2.009307267	0.604141497	-3.325888516	0.000881372	0.031663517	cv Sevin Septoria tritici 13 days
TraesCS1D02G244900.2	78.13680652	-9.107557318	2.137739313	-4.26036854	2.0409E-05	0.020727524	cv Sevin Septoria tritici 10 days
TraesCS1D02G248200.1	19.35898397	-20.29461596	3.407302699	-5.956211629	2.58152E-09	1.3859E-05	cv Sevin Septoria tritici 4 days
TraesCS1D02G249700.1	95.80463426	-2.34522024	0.673878019	-3.480185099	0.000501067	0.021875473	cv Sevin Septoria tritici 13 days
TraesCS1D02G257300.1	341.727125	-5.097462775	1.47640028	-3.452629238	0.000555151	0.023379007	cv Sevin Septoria tritici 13 days
TraesCS1D02G313800.2	3054.526238	-1.737543914	0.55563754	-3.12711757	0.001765293	0.049696288	cv Sevin Septoria tritici 13 days
TraesCS1D02G324200.2	10.14831795	-20.27552145	4.209061741	-4.817111911	1.45651E-06	0.000941216	cv Sevin Septoria tritici 4 days
TraesCS1D02G324200.2	10.14831795	-19.79441359	5.495745424	-3.601770472	0.000316057	0.016191752	cv Sevin Septoria tritici 13 days
TraesCS1D02G325300.1	175.6620025	-1.270616703	0.319805348	-3.973093982	7.0945E-05	0.027339869	cv Sevin Septoria tritici 4 days
TraesCS1D02G338000.1	82.35706799	-9.026319481	2.261753723	-3.990849839	6.5837E-05	0.005719245	cv Sevin Septoria tritici 13 days
TraesCS1D02G338100.1	995.5443036	-4.31900909	0.777904664	-5.552105921	2.82248E-08	1.19381E-05	cv Sevin Septoria tritici 13 days
TraesCS1D02G338200.1	315.1598552	-5.798191134	1.057859808	-5.48105816	4.22789E-08	1.59888E-05	cv Sevin Septoria tritici 13 days
TraesCS1D02G375000.1	122.3009527	-7.333648035	2.192196653	-3.345342228	0.000821811	0.030271461	cv Sevin Septoria tritici 13 days
TraesCS1D02G375100.1	1538.44559	-5.009112435	0.731300326	-6.849596881	7.40584E-12	1.44863E-08	cv Sevin Septoria tritici 13 days
TraesCS1D02G375700.1	6569.571286	-3.147536855	0.746914857	-4.214050405	2.50831E-05	0.002880294	cv Sevin Septoria tritici 13 days
TraesCS1D02G387000.3	58.32866828	-3.994788145	1.257593964	-3.176532537	0.001490471	0.045068465	cv Sevin Septoria tritici 13 days
TraesCS1D02G408300.1	317.9483654	-5.949612536	1.686665812	-3.52744005	0.000419599	0.019430334	cv Sevin Septoria tritici 13 days
TraesCS1D02G409700.1	300.3517098	-4.861567516	1.216230025	-3.997243461	6.40844E-05	0.005609955	cv Sevin Septoria tritici 13 days
TraesCS1D02G411600.1	85.70553191	-9.320502039	2.393827995	-3.893555451	9.87856E-05	0.00753594	cv Sevin Septoria tritici 13 days
TraesCS1D02G426700.1	90.47948771	-1.977373878	0.506736801	-3.902171449	9.53336E-05	0.034834694	cv Sevin Septoria tritici 4 days
TraesCS1D02G428200.1	3393.158649	-2.798157757	0.627536512	-4.458956096	8.23598E-06	0.001242538	cv Sevin Septoria tritici 13 days
TraesCS1D02G436700.1	79.32456777	-3.080385926	0.919616711	-3.349641095	0.000809163	0.029961226	cv Sevin Septoria tritici 13 days
TraesCS1D02G437000.1	284.1681758	-4.63873286	1.204433025	-3.851382987	0.000117453	0.008487413	cv Sevin Septoria tritici 13 days
TraesCS2A02G026700.1	73.09859467	-2.096375299	0.631719202	-3.318523944	0.000904946	0.032224699	cv Sevin Septoria tritici 13 days
TraesCS2A02G039400.1	47.20609068	-2.23583674	0.647293834	-3.454129522	0.000552072	0.023301224	cv Sevin Septoria tritici 13 days
TraesCS2A02G040200.1	66.04079595	-9.01389634	2.723710985	-3.309417331	0.000934904	0.032878843	cv Sevin Septoria tritici 13 days
TraesCS2A02G066700.1	5637.962119	-4.593128394	0.6641905	-6.915378035	4.66617E-12	9.45333E-09	cv Sevin Septoria tritici 13 days
TraesCS2A02G066800.1	7382.159677	-4.015210946	0.613899733	-6.54049958	6.13137E-11	9.15284E-08	cv Sevin Septoria tritici 13 days
TraesCS2A02G066900.1	2340.863204	-4.541397647	0.788028943	-5.76298331	8.264E-09	4.5513E-06	cv Sevin Septoria tritici 13 days
TraesCS2A02G067000.1	139.8890297	-5.037826489	1.085829235	-4.63961213	3.49064E-06	0.000636688	cv Sevin Septoria tritici 13 days
TraesCS2A02G067100.1	416.1413922	-4.58092181	0.81335281	-5.632146043	1.77981E-08	8.27553E-06	cv Sevin Septoria tritici 13 days
TraesCS2A02G067200.1	427.6230595	-4.894564739	1.094860317	-4.470492412	7.80397E-06	0.001199697	cv Sevin Septoria tritici 13 days
TraesCS2A02G067300.1	4330.595726	-3.36810915	0.936896088	-3.594965539	0.000324435	0.016373552	cv Sevin Septoria tritici 13 days
TraesCS2A02G067800.3	201.0819373	-4.531640206	0.970745746	-4.668205062	3.03843E-06	0.000570721	cv Sevin Septoria tritici 13 days
TraesCS2A02G072400.1	58.91067409	-8.616568757	2.243540283	-3.840612456	0.000122728	0.008757048	cv Sevin Septoria tritici 13 days
TraesCS2A02G075000.1	788.1812018	-12.45210243	3.711478588	-3.355024724	0.000793579	0.029538424	cv Sevin Septoria tritici 13 days
TraesCS2A02G111300.1	974.6199647	-1.859914946	0.4365716	-4.260274704	2.04176E-05	0.002501528	cv Sevin Septoria tritici 13 days
TraesCS2A02G126700.1	12.23346314	-19.42842493	4.040678168	-4.808208949	1.52289E-06	0.000952963	cv Sevin Septoria tritici 4 days
TraesCS2A02G126700.1	12.23346314	-19.94069398	5.280474839	-3.776306978	0.000159171	0.010504388	cv Sevin Septoria tritici 13 days
TraesCS2A02G132900.4	125.2270218	-9.657298567	2.331683512	-4.141770749	3.44635E-05	0.027921141	cv Sevin Septoria tritici 10 days
TraesCS2A02G134000.1	2696.243852	-4.000826132	0.707987958	-5.650980485	1.59535E-08	7.60487E-06	cv Sevin Septoria tritici 13 days
TraesCS2A02G156100.2	2461.332794	-4.660304101	1.332459348	-3.497520661	0.000469604	0.020946539	cv Sevin Septoria tritici 13 days
TraesCS2A02G189500.5	67.92534508	-4.19515914	0.884154724	-4.744824664	2.08687E-06	0.00042128	cv Sevin Septoria tritici 13 days
TraesCS2A02G190700.1	1071.205131	-1.206368417	0.363910178	-3.315016973	0.000916376	0.032488952	cv Sevin Septoria tritici 13 days
TraesCS2A02G200200.1	22.24387447	-7.00577149	2.189515725	-3.199689963	0.001375755	0.042645395	cv Sevin Septoria tritici 13 days
TraesCS2A02G203300.3	31.06834444	-7.657506637	2.263184544	-3.383509603	0.000715657	0.02790128	cv Sevin Septoria tritici 13 days
TraesCS2A02G204800.1	2206.022035	-2.517566367	0.554242734	-4.542353399	5.56297E-06	0.000924834	cv Sevin Septoria tritici 13 days
TraesCS2A02G215000.1	8109.408506	-2.155242427	0.381206956	-5.653733208	1.57E-08	7.54743E-06	cv Sevin Septoria tritici 13 days
TraesCS2A02G215300.1	72.56740332	-2.553830601	0.759146901	-3.364079598	0.000767994	0.029004808	cv Sevin Septoria tritici 13 days
TraesCS2A02G221000.1	333.3751888	-2.353414911	0.710481945	-3.312420432	0.000924924	0.032669525	cv Sevin Septoria tritici 13 days
TraesCS2A02G235000.1	250.9456597	-2.556858904	0.776267298	-3.293786705	0.000988475	0.034232124	cv Sevin Septoria tritici 13 days
TraesCS2A02G246300.4	10.23892814	-20.42465416	4.209034182	-4.852575028	1.21869E-06	0.00089059	cv Sevin Septoria tritici 4 days
TraesCS2A02G246300.4	10.23892814	-19.83658477	5.495724319	-3.609457756	0.000306838	0.015881791	cv Sevin Septoria tritici 13 days
TraesCS2A02G247300.1	395.6815736	-4.844981	1.379033206	-3.513317141	0.000442549	0.020228871	cv Sevin Septoria tritici 13 days
TraesCS2A02G249600.1	899.0711183	-4.623987658	1.411176263	-3.276690361	0.001050315	0.035612767	cv Sevin Septoria tritici 13 days
TraesCS2A02G253800.1	93.82460224	-2.159474271	0.624368272	-3.458654717	0.00054288	0.02300979	cv Sevin Septoria tritici 13 days
TraesCS2A02G253900.2	100.3521502	-9.444834368	2.556347081	-3.694660415	0.000220181	0.012876267	cv Sevin Septoria tritici 13 days
TraesCS2A02G254200.1	112.1502665	-2.913126458	0.773072947	-3.768242659	0.000164401	0.010670255	cv Sevin Septoria tritici 13 days
TraesCS2A02G254600.3	4216.001927	-2.022378863	0.588682169	-3.435434214	0.000591605	0.024424592	cv Sevin Septoria tritici 13 days
TraesCS2A02G262700.1	104.8760994	-9.594742349	2.362231005	-4.061729073	4.87106E-05	0.004675392	cv Sevin Septoria tritici 13 days
TraesCS2A02G265100.2	13.07337519	-6.884016592	1.668086543	-4.126894148	3.67696E-05	0.01574346	cv Sevin Septoria tritici 4 days
TraesCS2A02G272400.2	906.6991282	-1.064375946	0.336902882	-3.159296052	0.001581507	0.046774032	cv Sevin Septoria tritici 13 days
TraesCS2A02G286500.1	249.3725077	-1.664851505	0.508618863	-3.273279119	0.001063074	0.035833446	cv Sevin Septoria tritici 13 days
TraesCS2A02G286800.2	87.92710505	-9.109693879	2.194488476	-4.151169613	3.30781E-05	0.003565323	cv Sevin Septoria tritici 13 days
TraesCS2A02G292800.1	184.5774613	-1.287740319	0.406075091	-3.171187668	0.00151817	0.045555881	cv Sevin Septoria tritici 13 days
TraesCS2A02G295400.1	65.27045237	-4.561368335	1.163637556	-3.919921896	8.85777E-05	0.007027492	cv Sevin Septoria tritici 13 days
TraesCS2A02G296400.1	3082.113116	-3.346063356	0.79141001	-4.227977044	2.35802E-05	0.002743722	cv Sevin Septoria tritici 13 days
TraesCS2A02G300100.2	23.66227228	-22.93010318	4.20959047	-5.447110199	5.11947E-08	8.0061E-05	cv Sevin Septoria tritici 4 days
TraesCS2A02G300100.2	23.66227228	-18.60818476	5.496150356	-3.385676073	0.000710031	0.027792339	cv Sevin Septoria tritici 13 days
TraesCS2A02G301400.1	571.1847269	-2.264262653	0.548341194	-4.129295188	3.63877E-05	0.003780455	cv Sevin Septoria tritici 13 days
TraesCS2A02G313500.1	211.8509687	-3.466519902	1.032401297	-3.35772525	0.000785867	0.029411973	cv Sevin Septoria tritici 13 days
TraesCS2A02G320100.1	54.9396041	-2.994906059	0.704694106	-4.249937718	2.1383E-05	0.002569856	cv Sevin Septoria tritici 13 days
TraesCS2A02G327000.7	42.60855114	-3.311726594	0.858326013	-3.858355154	0.000114153	0.008311065	cv Sevin Septoria tritici 13 days
TraesCS2A02G335400.4	85.07753125	-8.726636222	2.217805952	-3.934806024	8.32639E-05	0.006757123	cv Sevin Septoria tritici 13 days
TraesCS2A02G342600.1	2110.150173	-3.584920554	0.740720885	-4.839772482	1.29988E-06	0.000284698	cv Sevin Septoria tritici 13 days
TraesCS2A02G356900.3	8.275519126	-20.49893383	4.209790379	-4.869347873	1.11967E-06	0.000868255	cv Sevin Septoria tritici 4 days
TraesCS2A02G357400.1	48.30355191	-3.963901962	1.012865874	-3.91355071	9.09488E-05	0.007116084	cv Sevin Septoria tritici 13 days
TraesCS2A02G365600.1	822.9147292	-1.221055975	0.339342212	-3.598302632	0.000320301	0.016257442	cv Sevin Septoria tritici 13 days
TraesCS2A02G387800.1	937.8422089	-1.278050995	0.345064305	-3.703805283	0.000212389	0.012536936	cv Sevin Septoria tritici 13 days
TraesCS2A02G390200.2	10.46901641	-21.14609356	4.208970427	-5.024053726	5.05921E-07	0.000511721	cv Sevin Septoria tritici 4 days
TraesCS2A02G390200.2	10.46901641	-19.86963435	5.495675493	-3.615503567	0.000299764	0.015668262	cv Sevin Septoria tritici 13 days
TraesCS2A02G391000.1	30.05977439	-7.845385166	1.663879269	-4.715116843	2.41572E-06	0.001296889	cv Sevin Septoria tritici 4 days
TraesCS2A02G391600.1	221.3405714	-3.445093394	1.048009713	-3.287272389	0.001011629	0.034695093	cv Sevin Septoria tritici 13 days
TraesCS2A02G404700.1	118.6375544	-4.022992749	0.79691826	-5.048187436	4.46021E-07	0.000114484	cv Sevin Septoria tritici 13 days
TraesCS2A02G425700.1	56.28789684	-8.950484718	2.175391927	-4.114423983	3.88147E-05	0.030438621	cv Sevin Septoria tritici 10 days
TraesCS2A02G427600.1	260.0581311	-3.142543094	0.920802279	-3.412831577	0.000642917	0.025883668	cv Sevin Septoria tritici 13 days
TraesCS2A02G437600.1	883.9548949	-2.31240865	0.692965692	-3.336974219	0.000846958	0.030857124	cv Sevin Septoria tritici 13 days
TraesCS2A02G437700.1	450.0485079	-4.023272901	0.514604224	-7.81818864	5.35888E-15	3.79985E-11	cv Sevin Septoria tritici 13 days
TraesCS2A02G448400.1	491.8453825	-3.123200248	0.779521495	-4.006560777	6.16093E-05	0.005445201	cv Sevin Septoria tritici 13 days
TraesCS2A02G456200.1	22.47388764	-7.593908035	1.775731144	-4.276496508	1.89858E-05	0.008528241	cv Sevin Septoria tritici 4 days
TraesCS2A02G478500.1	63.35996631	-8.690455642	2.745699334	-3.165115544	0.001550214	0.046185623	cv Sevin Septoria tritici 13 days
TraesCS2A02G491400.3	8.636199816	-20.9161174	4.209588889	-4.968684105	6.74088E-07	0.000627067	cv Sevin Septoria tritici 4 days
TraesCS2A02G494700.2	17.60718855	-19.33127521	4.367658129	-4.426004655	9.59945E-06	0.014226319	cv Sevin Septoria tritici 10 days
TraesCS2A02G494700.2	17.60718855	-19.1759708	4.367658129	-4.390446833	1.13118E-05	0.001600182	cv Sevin Septoria tritici 13 days
TraesCS2A02G501200.1	618.1493117	-1.202995387	0.3472948	-3.463902672	0.000532399	0.022793111	cv Sevin Septoria tritici 13 days
TraesCS2A02G517100.3	227.0499161	-22.7524439	5.000963462	-4.549612105	5.37449E-06	0.010420069	cv Sevin Septoria tritici 10 days
TraesCS2A02G523200.1	13.25074559	-6.867425386	1.726175394	-3.97840533	6.9379E-05	0.026900175	cv Sevin Septoria tritici 4 days
TraesCS2A02G559600.1	177.1293358	-5.443911483	1.133265018	-4.803740868	1.55728E-06	0.000328396	cv Sevin Septoria tritici 13 days
TraesCS2A02G559800.2	42.83317372	-8.171981073	2.264336691	-3.608995564	0.000307385	0.015894908	cv Sevin Septoria tritici 13 days
TraesCS2A02G563100.1	374.6221053	-4.556458906	1.078454046	-4.224991248	2.3895E-05	0.00276869	cv Sevin Septoria tritici 13 days
TraesCS2A02G582100.1	122.8349485	-2.710948114	0.734170205	-3.692533552	0.000222031	0.012944432	cv Sevin Septoria tritici 13 days
TraesCS2B02G058000.1	21.42834559	-7.572636459	2.419283936	-3.130114803	0.00174738	0.049551919	cv Sevin Septoria tritici 13 days
TraesCS2B02G058200.1	278.850593	-2.962388117	0.772335171	-3.835625033	0.000125245	0.008880836	cv Sevin Septoria tritici 13 days
TraesCS2B02G065200.1	119.2847094	-4.407544886	1.279459994	-3.444847753	0.000571381	0.023845294	cv Sevin Septoria tritici 13 days
TraesCS2B02G079100.1	8737.240268	-4.337150217	0.649742217	-6.675186107	2.46919E-11	4.51829E-08	cv Sevin Septoria tritici 13 days
TraesCS2B02G079200.1	4087.812549	-4.212268403	0.719129841	-5.857451828	4.70023E-09	2.9625E-06	cv Sevin Septoria tritici 13 days
TraesCS2B02G079300.1	542.6575003	-3.464125703	0.547677044	-6.325124889	2.53028E-10	2.4747E-07	cv Sevin Septoria tritici 13 days
TraesCS2B02G079400.1	591.3592859	-2.601022648	0.630959663	-4.122327939	3.75063E-05	0.003854313	cv Sevin Septoria tritici 13 days
TraesCS2B02G079500.1	3297.929429	-4.548676725	0.916317233	-4.964085102	6.90257E-07	0.0001618	cv Sevin Septoria tritici 13 days
TraesCS2B02G086200.1	93.94626276	-3.079812337	0.887842744	-3.46887144	0.000522649	0.022528735	cv Sevin Septoria tritici 13 days
TraesCS2B02G125300.1	32.69665694	-5.722100822	1.639990557	-3.489105957	0.000484639	0.021412037	cv Sevin Septoria tritici 13 days
TraesCS2B02G130300.1	659.3281399	-3.014996648	0.858825415	-3.510604826	0.000447088	0.020387092	cv Sevin Septoria tritici 13 days
TraesCS2B02G132900.3	37.52067088	-8.418751123	2.513962562	-3.348797333	0.000811631	0.029996534	cv Sevin Septoria tritici 13 days
TraesCS2B02G133500.1	1570.265182	-1.614989094	0.48313401	-3.342735266	0.00082957	0.030458374	cv Sevin Septoria tritici 13 days
TraesCS2B02G157600.1	2654.832017	-3.066926159	0.632203749	-4.851167305	1.22737E-06	0.00026986	cv Sevin Septoria tritici 13 days
TraesCS2B02G181600.1	1240.297208	-4.0561571	1.261988652	-3.214099504	0.001308543	0.041169396	cv Sevin Septoria tritici 13 days
TraesCS2B02G216400.1	1341.548237	-1.278762702	0.371588186	-3.441343803	0.000578833	0.024054839	cv Sevin Septoria tritici 13 days
TraesCS2B02G225300.1	262.3325893	-6.535919306	1.535330551	-4.257011169	2.07178E-05	0.00252197	cv Sevin Septoria tritici 13 days
TraesCS2B02G232300.3	156.248474	-10.39024065	2.265796138	-4.585690865	4.52488E-06	0.010420069	cv Sevin Septoria tritici 10 days
TraesCS2B02G232300.3	156.248474	-10.29094612	2.265796138	-4.541867625	5.57581E-06	0.000924834	cv Sevin Septoria tritici 13 days
TraesCS2B02G232900.1	58.89683955	-2.368644136	0.611536903	-3.873264432	0.000107387	0.038632269	cv Sevin Septoria tritici 4 days
TraesCS2B02G240000.1	7705.571605	-2.088962333	0.490845835	-4.255842028	2.08264E-05	0.002524352	cv Sevin Septoria tritici 13 days
TraesCS2B02G246600.1	163.8582286	-4.432109981	0.987746242	-4.487093744	7.22013E-06	0.00112829	cv Sevin Septoria tritici 13 days
TraesCS2B02G253500.2	49.44427651	-8.457687796	2.239919585	-3.775889033	0.000159438	0.010504388	cv Sevin Septoria tritici 13 days
TraesCS2B02G255700.2	67.08841493	-8.833630512	2.117487817	-4.171750337	3.02269E-05	0.003342397	cv Sevin Septoria tritici 13 days
TraesCS2B02G266600.1	59.35380042	-3.228847492	0.849642384	-3.800242962	0.000144554	0.009790422	cv Sevin Septoria tritici 13 days
TraesCS2B02G267000.1	142.6165658	-1.51896902	0.473478565	-3.208105144	0.001336126	0.041730297	cv Sevin Septoria tritici 13 days
TraesCS2B02G267500.1	8793.901915	-1.841435287	0.492079261	-3.742151787	0.000182451	0.011410948	cv Sevin Septoria tritici 13 days
TraesCS2B02G270100.1	29.18420887	-7.90604816	2.170966401	-3.64171834	0.000270824	0.014820317	cv Sevin Septoria tritici 13 days
TraesCS2B02G271300.1	838.5483196	-4.295968887	1.344456252	-3.195320696	0.001396755	0.043087162	cv Sevin Septoria tritici 13 days
TraesCS2B02G273400.1	175.0603825	-2.043626488	0.60129949	-3.398683222	0.000677111	0.026807734	cv Sevin Septoria tritici 13 days
TraesCS2B02G296700.3	150.8989599	-9.794800488	2.178417666	-4.496291341	6.9149E-06	0.001092631	cv Sevin Septoria tritici 13 days
TraesCS2B02G309400.3	29.62204039	-7.489913472	2.141162618	-3.498059143	0.000468657	0.020946539	cv Sevin Septoria tritici 13 days
TraesCS2B02G317500.2	373.3598103	-3.199978471	0.459194189	-6.968682416	3.19923E-12	6.72146E-09	cv Sevin Septoria tritici 13 days
TraesCS2B02G325100.2	450.252847	-5.835210635	1.027968376	-5.676449561	1.37519E-08	0.000210185	cv Sevin Septoria tritici 10 days
TraesCS2B02G325100.2	450.252847	-3.241153718	0.949249871	-3.414436828	0.00063914	0.025749903	cv Sevin Septoria tritici 13 days
TraesCS2B02G326700.1	81.06560279	-9.484930441	2.100549599	-4.515451788	6.31819E-06	0.010795835	cv Sevin Septoria tritici 10 days
TraesCS2B02G328500.2	97.05634207	-8.793260742	2.795562804	-3.145434877	0.001658401	0.048032697	cv Sevin Septoria tritici 13 days
TraesCS2B02G329600.1	2109.750394	-2.951290243	0.505083062	-5.843178013	5.12142E-09	3.1578E-06	cv Sevin Septoria tritici 13 days
TraesCS2B02G332300.1	247.3276102	-3.125940029	0.980976308	-3.186560169	0.001439755	0.044118288	cv Sevin Septoria tritici 13 days
TraesCS2B02G339200.2	123.9793164	-7.269421675	1.530700815	-4.749080686	2.04343E-06	0.007446755	cv Sevin Septoria tritici 10 days
TraesCS2B02G340300.1	2352.799191	-3.232979838	0.695164196	-4.650670817	3.30857E-06	0.000607385	cv Sevin Septoria tritici 13 days
TraesCS2B02G342200.1	10858.14531	-1.729325481	0.473717832	-3.650539126	0.00026169	0.014440323	cv Sevin Septoria tritici 13 days
TraesCS2B02G346500.1	138.8669106	-9.850220084	2.291105345	-4.299330935	1.71315E-05	0.002193676	cv Sevin Septoria tritici 13 days
TraesCS2B02G369400.2	111.6879979	-9.479897226	2.128410803	-4.453979097	8.42933E-06	0.0133901	cv Sevin Septoria tritici 10 days
TraesCS2B02G369600.1	406.3269073	-2.376297631	0.696934247	-3.40964394	0.000650477	0.026077019	cv Sevin Septoria tritici 13 days
TraesCS2B02G380500.1	11.17903157	-19.69663329	4.83416846	-4.074461503	4.61209E-05	0.03296146	cv Sevin Septoria tritici 10 days
TraesCS2B02G390700.1	124.2622921	-1.837980568	0.4817893	-3.814905327	0.000136235	0.009482301	cv Sevin Septoria tritici 13 days
TraesCS2B02G392700.1	64.57219643	-2.328476682	0.717216141	-3.246548077	0.001168137	0.038280617	cv Sevin Septoria tritici 13 days
TraesCS2B02G401400.1	144.8716198	-3.924997718	1.1723778	-3.347894953	0.000814279	0.030072118	cv Sevin Septoria tritici 13 days
TraesCS2B02G405600.1	656.455426	-1.078865542	0.341005256	-3.163779801	0.001557346	0.046252466	cv Sevin Septoria tritici 13 days
TraesCS2B02G418400.1	139.1677825	-1.927551858	0.51639039	-3.732741541	0.000189407	0.011678584	cv Sevin Septoria tritici 13 days
TraesCS2B02G428100.1	111.1148477	-2.552928018	0.780472665	-3.271002474	0.00107167	0.035992621	cv Sevin Septoria tritici 13 days
TraesCS2B02G444500.1	250.4503994	-3.14382765	0.953492708	-3.297170104	0.000976643	0.033967547	cv Sevin Septoria tritici 13 days
TraesCS2B02G453400.2	69.2009306	-8.74077683	2.314879973	-3.775909305	0.000159425	0.010504388	cv Sevin Septoria tritici 13 days
TraesCS2B02G455700.2	96.26681215	-2.806245809	0.69666439	-4.028117196	5.62253E-05	0.036284071	cv Sevin Septoria tritici 10 days
TraesCS2B02G457600.1	77.10544757	-6.799811671	1.716980962	-3.960330267	7.48462E-05	0.006225402	cv Sevin Septoria tritici 13 days
TraesCS2B02G469100.1	315.3976745	-2.716441724	0.77855467	-3.48908282	0.000484681	0.021412037	cv Sevin Septoria tritici 13 days
TraesCS2B02G472600.1	73.74634998	-2.134207269	0.667550497	-3.197072401	0.001388301	0.042935496	cv Sevin Septoria tritici 13 days
TraesCS2B02G486000.3	178.7185687	-2.992249339	0.807623979	-3.70500309	0.000211388	0.012529994	cv Sevin Septoria tritici 13 days
TraesCS2B02G489600.1	18.08532176	-20.62219594	3.476633101	-5.931657249	2.99892E-09	1.46604E-05	cv Sevin Septoria tritici 4 days
TraesCS2B02G528300.2	2646.75446	-1.682070233	0.417665744	-4.027311932	5.64182E-05	0.005178603	cv Sevin Septoria tritici 13 days
TraesCS2B02G545600.2	312.8721242	-23.6946579	4.18154204	-5.666488025	1.45754E-08	0.000210185	cv Sevin Septoria tritici 10 days
TraesCS2B02G550200.1	187.1051167	-1.375124398	0.423393857	-3.247861008	0.001162761	0.038148499	cv Sevin Septoria tritici 13 days
TraesCS2B02G585100.2	47.89325655	-8.117458033	2.376666169	-3.415480953	0.000636695	0.02567043	cv Sevin Septoria tritici 13 days
TraesCS2B02G595200.1	87.75820467	-3.682740016	1.09140822	-3.374301155	0.000740034	0.028345135	cv Sevin Septoria tritici 13 days
TraesCS2B02G624200.1	53.7903933	-2.900440074	0.900072475	-3.222451698	0.001270986	0.040391007	cv Sevin Septoria tritici 13 days
TraesCS2D02G027600.2	53.95890117	-8.798862725	2.781473217	-3.16338215	0.001559475	0.046267137	cv Sevin Septoria tritici 13 days
TraesCS2D02G033200.1	26.47726988	-22.77994633	4.209454859	-5.411614352	6.24591E-08	9.08142E-05	cv Sevin Septoria tritici 4 days
TraesCS2D02G033200.1	26.47726988	-18.485431	5.496046495	-3.363405134	0.000769873	0.029056428	cv Sevin Septoria tritici 13 days
TraesCS2D02G044600.1	100.1934744	-4.004583198	0.729257614	-5.491314897	3.98952E-08	1.54183E-05	cv Sevin Septoria tritici 13 days
TraesCS2D02G049500.1	4801.338414	-5.321546678	1.415408722	-3.759724378	0.000170101	0.010853914	cv Sevin Septoria tritici 13 days
TraesCS2D02G056500.1	63.1525943	-2.172516349	0.561296309	-3.870533821	0.000108597	0.038867248	cv Sevin Septoria tritici 4 days
TraesCS2D02G065100.2	7685.105858	-5.318663766	0.746562579	-7.124203539	1.04684E-12	2.84358E-09	cv Sevin Septoria tritici 13 days
TraesCS2D02G065200.1	9416.534923	-3.851845229	0.70818004	-5.439076235	5.35575E-08	1.9351E-05	cv Sevin Septoria tritici 13 days
TraesCS2D02G065300.1	3840.304251	-4.265967957	0.672911104	-6.339571349	2.30405E-10	2.39119E-07	cv Sevin Septoria tritici 13 days
TraesCS2D02G065400.1	412.6481078	-4.685227019	1.063739901	-4.404485545	1.06035E-05	0.001518928	cv Sevin Septoria tritici 13 days
TraesCS2D02G065600.1	2943.801689	-3.650020799	0.81357491	-4.486397936	7.24374E-06	0.001128869	cv Sevin Septoria tritici 13 days
TraesCS2D02G069300.1	84.88867724	-9.689180188	2.793761562	-3.468148578	0.000524057	0.02256719	cv Sevin Septoria tritici 13 days
TraesCS2D02G073700.1	240.3106355	-23.13065596	4.587557105	-5.042042079	4.6059E-07	0.00011664	cv Sevin Septoria tritici 13 days
TraesCS2D02G112000.1	820.5248631	-2.592611463	0.628261741	-4.126642279	3.68098E-05	0.003803414	cv Sevin Septoria tritici 13 days
TraesCS2D02G136200.1	1953.877214	-3.577112829	0.636256991	-5.622119487	1.88629E-08	8.56012E-06	cv Sevin Septoria tritici 13 days
TraesCS2D02G161900.2	415.4545652	-11.66775119	2.540108527	-4.593406568	4.36068E-06	0.010420069	cv Sevin Septoria tritici 10 days
TraesCS2D02G161900.2	415.4545652	-4.955896415	1.550843607	-3.195613272	0.00139534	0.043087162	cv Sevin Septoria tritici 13 days
TraesCS2D02G194000.1	1195.328804	-2.377142173	0.759371627	-3.130406889	0.001745643	0.049551919	cv Sevin Septoria tritici 13 days
TraesCS2D02G195400.2	19.0338772	-7.190051569	2.232631765	-3.220437728	0.00127995	0.040578234	cv Sevin Septoria tritici 13 days
TraesCS2D02G197300.1	1909.747554	-1.184365958	0.324191508	-3.653291127	0.0002589	0.014330515	cv Sevin Septoria tritici 13 days
TraesCS2D02G200700.1	5937.304785	-2.970716022	0.819144498	-3.626608039	0.000287169	0.015353376	cv Sevin Septoria tritici 13 days
TraesCS2D02G205900.2	536.6096937	-3.735211502	1.086893929	-3.436592481	0.000589081	0.024355428	cv Sevin Septoria tritici 13 days
TraesCS2D02G207000.4	10.46901641	-21.14609356	4.208970427	-5.024053726	5.05921E-07	0.000511721	cv Sevin Septoria tritici 4 days
TraesCS2D02G207000.4	10.46901641	-19.86963435	5.495675493	-3.615503567	0.000299764	0.015668262	cv Sevin Septoria tritici 13 days
TraesCS2D02G209900.1	4046.087439	-2.687908158	0.848094041	-3.169351543	0.001527795	0.045733873	cv Sevin Septoria tritici 13 days
TraesCS2D02G211200.4	241.8909384	-3.023159701	0.718524047	-4.20745793	2.58259E-05	0.0228567	cv Sevin Septoria tritici 10 days
TraesCS2D02G220800.1	8374.834468	-2.564259162	0.436950648	-5.868532696	4.39669E-09	2.80232E-06	cv Sevin Septoria tritici 13 days
TraesCS2D02G238700.1	490.1876995	-2.12393343	0.575415405	-3.691130639	0.000223259	0.013002684	cv Sevin Septoria tritici 13 days
TraesCS2D02G244500.1	190.393658	-10.27783313	2.251965843	-4.563938285	5.02028E-06	0.000840061	cv Sevin Septoria tritici 13 days
TraesCS2D02G246100.1	545.8425179	-11.61919003	3.614208089	-3.214864708	0.00130506	0.041097994	cv Sevin Septoria tritici 13 days
TraesCS2D02G248400.1	5319.545918	-1.614254622	0.370664033	-4.35503442	1.33046E-05	0.001801233	cv Sevin Septoria tritici 13 days
TraesCS2D02G251000.1	1090.874533	-4.351531581	1.378954539	-3.155674431	0.001601275	0.047042899	cv Sevin Septoria tritici 13 days
TraesCS2D02G253300.2	54.5845669	-4.262743674	1.362506169	-3.128605045	0.001756382	0.049642519	cv Sevin Septoria tritici 13 days
TraesCS2D02G254300.2	89.16044906	-2.522487116	0.720944506	-3.498864472	0.000467244	0.020946539	cv Sevin Septoria tritici 13 days
TraesCS2D02G272300.1	79.56126968	-9.162568823	2.107081313	-4.348464753	1.37094E-05	0.016508538	cv Sevin Septoria tritici 10 days
TraesCS2D02G286200.5	35.89403534	-8.488876956	2.166543249	-3.918166397	8.92251E-05	0.049401061	cv Sevin Septoria tritici 10 days
TraesCS2D02G286200.5	35.89403534	-8.389582392	2.166543249	-3.872335526	0.000107797	0.007993355	cv Sevin Septoria tritici 13 days
TraesCS2D02G292200.1	41.38549872	-7.893231345	2.512301424	-3.14183293	0.001678938	0.048369447	cv Sevin Septoria tritici 13 days
TraesCS2D02G294300.1	3057.860476	-3.319292044	0.710564705	-4.671343821	2.99236E-06	0.000563935	cv Sevin Septoria tritici 13 days
TraesCS2D02G298100.1	148.6314964	-2.208896114	0.66467829	-3.323255995	0.000889732	0.031883102	cv Sevin Septoria tritici 13 days
TraesCS2D02G300000.1	1924.858021	-2.79272649	0.53533717	-5.216761783	1.82078E-07	5.31364E-05	cv Sevin Septoria tritici 13 days
TraesCS2D02G316200.1	249.5179366	-3.590160477	0.77847106	-4.611809819	3.99178E-06	0.000714315	cv Sevin Septoria tritici 13 days
TraesCS2D02G320900.1	2091.937863	-3.637011584	0.76646137	-4.745198816	2.08302E-06	0.00042128	cv Sevin Septoria tritici 13 days
TraesCS2D02G327400.2	114.705399	-9.591978322	2.319412451	-4.135520752	3.54151E-05	0.003727189	cv Sevin Septoria tritici 13 days
TraesCS2D02G329500.1	196.4841169	-2.630757798	0.840426962	-3.130263444	0.001746496	0.049551919	cv Sevin Septoria tritici 13 days
TraesCS2D02G335300.1	66.93161378	-8.387692871	2.267715779	-3.698740798	0.000216672	0.012749918	cv Sevin Septoria tritici 13 days
TraesCS2D02G335900.5	21.32920208	-19.35178769	4.727858474	-4.093140223	4.2557E-05	0.031759622	cv Sevin Septoria tritici 10 days
TraesCS2D02G355700.3	8.398221956	-21.06989306	4.209687885	-5.005096254	5.58341E-07	0.000548834	cv Sevin Septoria tritici 4 days
TraesCS2D02G380900.2	65.46089927	-3.069875387	0.866843872	-3.541439799	0.00039795	0.018750782	cv Sevin Septoria tritici 13 days
TraesCS2D02G381000.1	124.7040012	-2.183284308	0.559677025	-3.900971829	9.58073E-05	0.007424542	cv Sevin Septoria tritici 13 days
TraesCS2D02G385300.1	607.1716769	-1.332110448	0.396973692	-3.355664306	0.000791746	0.02953392	cv Sevin Septoria tritici 13 days
TraesCS2D02G389900.1	771.8882988	-4.34358612	1.340560299	-3.240127373	0.001194763	0.03875022	cv Sevin Septoria tritici 13 days
TraesCS2D02G395600.1	32.2056137	-7.624384606	2.396556089	-3.181392098	0.001465691	0.044652413	cv Sevin Septoria tritici 13 days
TraesCS2D02G407900.1	17.28453995	-7.073080647	2.212447607	-3.196948314	0.001388898	0.042935496	cv Sevin Septoria tritici 13 days
TraesCS2D02G408200.3	15.93439684	-20.95276043	4.207968038	-4.979305985	6.38127E-07	0.000604014	cv Sevin Septoria tritici 4 days
TraesCS2D02G408200.3	15.93439684	-20.18079314	5.49490787	-3.672635396	0.000240062	0.01367244	cv Sevin Septoria tritici 13 days
TraesCS2D02G423600.3	46.70174534	-3.36441469	0.969204389	-3.471315986	0.000517914	0.022358599	cv Sevin Septoria tritici 13 days
TraesCS2D02G425000.1	635.5337178	-2.745636588	0.786361132	-3.491572098	0.000480187	0.021247332	cv Sevin Septoria tritici 13 days
TraesCS2D02G427700.3	119.5309827	-9.794976928	2.282745486	-4.290875609	1.7797E-05	0.002253361	cv Sevin Septoria tritici 13 days
TraesCS2D02G434500.1	202.4979768	-4.237705455	0.892990097	-4.745523461	2.07968E-06	0.00042128	cv Sevin Septoria tritici 13 days
TraesCS2D02G447500.1	357.4153734	-2.970244431	0.677671959	-4.383012154	1.1705E-05	0.001635408	cv Sevin Septoria tritici 13 days
TraesCS2D02G500600.1	1503.849414	-1.368185027	0.366160679	-3.736570054	0.000186547	0.011565129	cv Sevin Septoria tritici 13 days
TraesCS2D02G538200.1	30.40459922	-2.625854478	0.825373882	-3.181412129	0.00146559	0.044652413	cv Sevin Septoria tritici 13 days
TraesCS2D02G559200.1	198.5351347	-1.266487879	0.399032624	-3.173895578	0.001504078	0.045286172	cv Sevin Septoria tritici 13 days
TraesCS2D02G573300.1	174.8424883	-2.058704396	0.578144837	-3.560880012	0.000369614	0.017966343	cv Sevin Septoria tritici 13 days
TraesCS2D02G573400.2	33.74394553	-3.526455214	1.037844293	-3.397865401	0.000679138	0.026840495	cv Sevin Septoria tritici 13 days
TraesCS2D02G574200.2	55.56904506	-2.491476972	0.667919082	-3.730207801	0.000191322	0.011750357	cv Sevin Septoria tritici 13 days
TraesCS2D02G596600.1	116.4199459	-1.978601131	0.558447565	-3.543038334	0.000395545	0.018704142	cv Sevin Septoria tritici 13 days
TraesCS2D02G597500.2	56.29488972	-4.116863405	1.076626052	-3.823856388	0.00013138	0.009189504	cv Sevin Septoria tritici 13 days
TraesCS3A02G015500.2	14.95892748	-19.28069437	5.496277936	-3.507954764	0.000451566	0.02048691	cv Sevin Septoria tritici 13 days
TraesCS3A02G022600.3	110.7266178	-17.23664614	5.504715655	-3.131250954	0.001740634	0.049542988	cv Sevin Septoria tritici 13 days
TraesCS3A02G023200.1	9.203530911	-20.43362917	4.209369854	-4.854320213	1.208E-06	0.00089059	cv Sevin Septoria tritici 4 days
TraesCS3A02G023200.1	9.203530911	-19.90999349	5.495981393	-3.622645723	0.000291605	0.015473892	cv Sevin Septoria tritici 13 days
TraesCS3A02G044000.1	550.43605	-1.780280851	0.445999188	-3.991668368	6.56101E-05	0.005714194	cv Sevin Septoria tritici 13 days
TraesCS3A02G055300.1	268.168557	-2.86234762	0.855466433	-3.34594966	0.000820013	0.030224852	cv Sevin Septoria tritici 13 days
TraesCS3A02G059600.1	384.2400769	-5.061650226	1.502227369	-3.369430174	0.000753238	0.02867662	cv Sevin Septoria tritici 13 days
TraesCS3A02G060300.1	127.997043	-3.949279195	1.14924906	-3.43639976	0.0005895	0.024355428	cv Sevin Septoria tritici 13 days
TraesCS3A02G081300.1	34.26466126	-8.559252644	2.516121618	-3.40176428	0.000669524	0.026596215	cv Sevin Septoria tritici 13 days
TraesCS3A02G086700.4	28.37054097	-19.65564716	5.495489338	-3.576687343	0.000347976	0.017234376	cv Sevin Septoria tritici 13 days
TraesCS3A02G118200.1	241.4122041	-2.573447028	0.54788173	-4.69708495	2.63901E-06	0.000507459	cv Sevin Septoria tritici 13 days
TraesCS3A02G121300.2	133.6957601	-3.192795744	0.869994491	-3.669903402	0.000242642	0.013750368	cv Sevin Septoria tritici 13 days
TraesCS3A02G134100.1	18.32212366	-19.41087477	5.427374155	-3.576476252	0.000348257	0.017234376	cv Sevin Septoria tritici 13 days
TraesCS3A02G135800.1	824.0892269	-1.763684833	0.369467865	-4.773581142	1.80979E-06	0.000374679	cv Sevin Septoria tritici 13 days
TraesCS3A02G136900.1	55.40237842	-5.974855505	1.854539522	-3.221746118	0.00127412	0.040445283	cv Sevin Septoria tritici 13 days
TraesCS3A02G143200.2	60.76512417	-3.045659067	0.964302634	-3.158405836	0.001586345	0.04689267	cv Sevin Septoria tritici 13 days
TraesCS3A02G158100.1	224.4101931	-3.559293478	0.946142367	-3.761900537	0.000168627	0.01078415	cv Sevin Septoria tritici 13 days
TraesCS3A02G191700.3	5121.303502	-2.606090903	0.517111353	-5.039709312	4.66239E-07	0.000117546	cv Sevin Septoria tritici 13 days
TraesCS3A02G192400.2	62.55341113	-19.6137506	5.495650941	-3.568958584	0.000358403	0.017602401	cv Sevin Septoria tritici 13 days
TraesCS3A02G202000.1	18.15637141	-22.55426167	3.892753015	-5.79391027	6.87662E-09	1.65492E-05	cv Sevin Septoria tritici 4 days
TraesCS3A02G202000.1	18.15637141	-18.83083994	5.092510999	-3.697751452	0.000217518	0.012773198	cv Sevin Septoria tritici 13 days
TraesCS3A02G208800.1	147.7960619	-2.946893983	0.728981698	-4.042480067	5.28888E-05	0.004950777	cv Sevin Septoria tritici 13 days
TraesCS3A02G218000.1	50.07239865	-2.918716253	0.736242403	-3.964341417	7.35989E-05	0.027915965	cv Sevin Septoria tritici 4 days
TraesCS3A02G220300.1	49.57833955	-2.106127828	0.644689401	-3.266887626	0.001087368	0.036262232	cv Sevin Septoria tritici 13 days
TraesCS3A02G222700.1	448.5547952	-3.750445334	1.12457471	-3.33498993	0.000853025	0.03099852	cv Sevin Septoria tritici 13 days
TraesCS3A02G230000.2	11306.8126	-5.159808393	0.669071065	-7.711898871	1.23959E-14	5.8919E-11	cv Sevin Septoria tritici 13 days
TraesCS3A02G233600.1	339.3883094	-6.932389414	1.422955008	-4.871826146	1.10571E-06	0.000245011	cv Sevin Septoria tritici 13 days
TraesCS3A02G236500.2	51.90737236	-8.960251424	2.189421155	-4.092520712	4.26709E-05	0.031759622	cv Sevin Septoria tritici 10 days
TraesCS3A02G236500.2	51.90737236	-8.860956868	2.189421155	-4.047168745	5.18409E-05	0.004860703	cv Sevin Septoria tritici 13 days
TraesCS3A02G252000.1	51.14264912	-3.701702289	1.044828204	-3.542881284	0.000395781	0.018704142	cv Sevin Septoria tritici 13 days
TraesCS3A02G256400.2	539.235654	-1.818593425	0.496592303	-3.66214582	0.000250111	0.013991933	cv Sevin Septoria tritici 13 days
TraesCS3A02G262700.2	10.73470229	-20.86321988	4.208896455	-4.95693351	7.16145E-07	0.000632664	cv Sevin Septoria tritici 4 days
TraesCS3A02G262700.2	10.73470229	-19.92739099	5.495618843	-3.626050416	0.000287789	0.015372062	cv Sevin Septoria tritici 13 days
TraesCS3A02G272200.1	1052.359836	-4.454819389	1.400975827	-3.179797469	0.00147378	0.044778604	cv Sevin Septoria tritici 13 days
TraesCS3A02G287900.3	13.90235894	-19.46929737	5.495899008	-3.54251367	0.000396333	0.018704142	cv Sevin Septoria tritici 13 days
TraesCS3A02G288200.7	326.4282185	-2.226944083	0.690970606	-3.222921589	0.001268903	0.040347412	cv Sevin Septoria tritici 13 days
TraesCS3A02G288900.2	23.26586398	-23.920555	4.208482508	-5.683890798	1.31664E-08	2.5525E-05	cv Sevin Septoria tritici 4 days
TraesCS3A02G298900.1	38.14025879	-8.132526491	2.181151926	-3.72854655	0.000192587	0.011778293	cv Sevin Septoria tritici 13 days
TraesCS3A02G332300.1	1402.605288	-3.959389892	1.218755609	-3.248715217	0.001159275	0.038078182	cv Sevin Septoria tritici 13 days
TraesCS3A02G339900.2	63.75070522	-8.956505484	2.768681224	-3.23493561	0.001216702	0.039215124	cv Sevin Septoria tritici 13 days
TraesCS3A02G398500.1	1131.176273	-1.141286096	0.312403014	-3.653249309	0.000258943	0.014330515	cv Sevin Septoria tritici 13 days
TraesCS3A02G398600.2	13.26202663	-19.51202749	5.495835569	-3.550329562	0.000384749	0.01850604	cv Sevin Septoria tritici 13 days
TraesCS3A02G399600.2	330.6133999	-5.953527452	1.334335553	-4.461791816	8.12772E-06	0.001229474	cv Sevin Septoria tritici 13 days
TraesCS3A02G417000.2	207.892852	-2.7436526	0.551084108	-4.978645837	6.40307E-07	0.003606208	cv Sevin Septoria tritici 10 days
TraesCS3A02G422800.2	23.93787368	-7.415066295	2.286999897	-3.242267875	0.001185825	0.038593997	cv Sevin Septoria tritici 13 days
TraesCS3A02G444000.1	323.1717569	-1.646870363	0.404015966	-4.076250694	4.57677E-05	0.03296146	cv Sevin Septoria tritici 10 days
TraesCS3A02G447500.1	2628.826804	-5.823200431	0.506384954	-11.49955263	1.32601E-30	7.52192E-26	cv Sevin Septoria tritici 13 days
TraesCS3A02G498300.1	207.6344826	-2.157996485	0.664378917	-3.248141127	0.001161616	0.038133016	cv Sevin Septoria tritici 13 days
TraesCS3A02G502300.1	88.51302289	-1.982663398	0.544210698	-3.643190778	0.000269279	0.014758576	cv Sevin Septoria tritici 13 days
TraesCS3A02G506200.1	1452.264502	-1.21149625	0.356457419	-3.398712397	0.000677039	0.026807734	cv Sevin Septoria tritici 13 days
TraesCS3A02G524800.2	26.773883	-7.427061692	1.641529967	-4.52447524	6.05455E-06	0.002975728	cv Sevin Septoria tritici 4 days
TraesCS3A02G533300.2	25.48025299	-7.618986394	1.602560509	-4.754258171	1.99176E-06	0.001094545	cv Sevin Septoria tritici 4 days
TraesCS3A02G538000.1	55.4451883	-8.849818999	2.182985576	-4.053997927	5.03497E-05	0.033905025	cv Sevin Septoria tritici 10 days
TraesCS3B02G003100.3	50.39407524	-5.115294305	1.124989033	-4.546972595	5.44231E-06	0.002752349	cv Sevin Septoria tritici 4 days
TraesCS3B02G035900.3	16.97120823	-19.68238868	5.495535575	-3.581523295	0.000341597	0.017042579	cv Sevin Septoria tritici 13 days
TraesCS3B02G062600.1	395.2047217	-3.0211355	0.863049324	-3.500536315	0.000464323	0.020920719	cv Sevin Septoria tritici 13 days
TraesCS3B02G064100.1	37.04336806	-7.659273266	2.258832951	-3.39080996	0.000696864	0.027383592	cv Sevin Septoria tritici 13 days
TraesCS3B02G067300.2	167.3491857	-3.494362992	0.986354214	-3.542706001	0.000396044	0.018704142	cv Sevin Septoria tritici 13 days
TraesCS3B02G072200.1	1542.51362	-4.914679155	1.358140951	-3.61868122	0.000296108	0.015606135	cv Sevin Septoria tritici 13 days
TraesCS3B02G073000.1	198.7779441	-2.828236348	0.809695011	-3.492965018	0.000477689	0.021153311	cv Sevin Septoria tritici 13 days
TraesCS3B02G073200.1	212.9098712	-3.3815841	1.03464536	-3.268350908	0.001081762	0.036202953	cv Sevin Septoria tritici 13 days
TraesCS3B02G137300.1	252.5082821	-1.67847451	0.432069407	-3.88473352	0.000102442	0.007686687	cv Sevin Septoria tritici 13 days
TraesCS3B02G141400.1	85.31172919	-9.135266762	2.735975707	-3.338942937	0.000840978	0.030678675	cv Sevin Septoria tritici 13 days
TraesCS3B02G141400.2	40.7027484	-21.2172918	4.207638086	-5.042565773	4.59331E-07	0.000478465	cv Sevin Septoria tritici 4 days
TraesCS3B02G153900.1	415.4581876	-1.806619531	0.427323723	-4.227753885	2.36036E-05	0.002743722	cv Sevin Septoria tritici 13 days
TraesCS3B02G154800.1	96.06494981	-2.316171729	0.731565745	-3.16604727	0.001545257	0.046110593	cv Sevin Septoria tritici 13 days
TraesCS3B02G154900.1	384.9657869	-3.955543896	1.246333027	-3.173745549	0.001504856	0.045286172	cv Sevin Septoria tritici 13 days
TraesCS3B02G164200.1	19.78131657	-7.076234126	2.223190034	-3.182919146	0.001457983	0.044506087	cv Sevin Septoria tritici 13 days
TraesCS3B02G173800.1	94.1090075	-3.861131311	1.013539434	-3.80955213	0.000139219	0.009570934	cv Sevin Septoria tritici 13 days
TraesCS3B02G181300.1	2989.778842	-6.769530859	0.954592541	-7.091539652	1.32628E-12	3.27107E-09	cv Sevin Septoria tritici 13 days
TraesCS3B02G211500.1	94.04008438	-5.110659841	1.513464011	-3.376796412	0.000733353	0.028288371	cv Sevin Septoria tritici 13 days
TraesCS3B02G219200.7	13.25143074	-19.57075972	4.572980709	-4.279650619	1.87187E-05	0.019994146	cv Sevin Septoria tritici 10 days
TraesCS3B02G219200.7	13.25143074	-19.41747401	4.572980709	-4.24613075	2.17494E-05	0.002597379	cv Sevin Septoria tritici 13 days
TraesCS3B02G219400.1	977.254189	-4.110566062	1.178987897	-3.486521	0.000489347	0.021518369	cv Sevin Septoria tritici 13 days
TraesCS3B02G219700.1	3695.737176	-2.997308675	0.570107106	-5.257448369	1.46068E-07	4.60325E-05	cv Sevin Septoria tritici 13 days
TraesCS3B02G228900.3	37.09358013	-7.615487488	2.398762926	-3.174756207	0.001499624	0.045224717	cv Sevin Septoria tritici 13 days
TraesCS3B02G237200.1	357.0865988	-2.464334093	0.573312532	-4.298413093	1.72025E-05	0.002197817	cv Sevin Septoria tritici 13 days
TraesCS3B02G239100.1	155.7694731	-2.828307802	0.663711541	-4.261350941	2.03195E-05	0.002494899	cv Sevin Septoria tritici 13 days
TraesCS3B02G244700.1	12.67044341	-24.07352807	4.110223924	-5.856986996	4.7134E-09	1.59457E-05	cv Sevin Septoria tritici 4 days
TraesCS3B02G248600.1	33.71112023	-8.126255625	2.155997606	-3.769139448	0.000163811	0.010652373	cv Sevin Septoria tritici 13 days
TraesCS3B02G250000.2	12.40977682	-26.27204079	4.061197492	-6.469037974	9.86288E-11	1.37668E-06	cv Sevin Septoria tritici 4 days
TraesCS3B02G250000.2	12.40977682	-18.07011096	5.306879358	-3.405035189	0.000661555	0.026353501	cv Sevin Septoria tritici 13 days
TraesCS3B02G250000.3	30.98914218	-7.895446502	1.705032165	-4.630673054	3.64479E-06	0.00189831	cv Sevin Septoria tritici 4 days
TraesCS3B02G252600.1	297.933912	-3.808976583	1.163966784	-3.272410034	0.001066348	0.035890829	cv Sevin Septoria tritici 13 days
TraesCS3B02G253000.1	46.28393385	-2.628412558	0.839642963	-3.130393126	0.001745725	0.049551919	cv Sevin Septoria tritici 13 days
TraesCS3B02G259300.1	6368.588514	-5.922830896	0.654623777	-9.047686781	1.46029E-19	2.76121E-15	cv Sevin Septoria tritici 13 days
TraesCS3B02G259300.2	1794.88727	-4.796049325	1.118591731	-4.287578026	1.80632E-05	0.002277005	cv Sevin Septoria tritici 13 days
TraesCS3B02G259500.1	204.4838306	-1.635119505	0.516880724	-3.163436803	0.001559182	0.046267137	cv Sevin Septoria tritici 13 days
TraesCS3B02G268900.1	1503.473123	-2.853035046	0.880919634	-3.238700711	0.001200755	0.038855693	cv Sevin Septoria tritici 13 days
TraesCS3B02G272000.1	125.9976191	-3.102251985	0.782588543	-3.964090726	7.36762E-05	0.006155166	cv Sevin Septoria tritici 13 days
TraesCS3B02G276700.1	168.8681428	-10.17529251	2.091102339	-4.865994515	1.13883E-06	0.000251366	cv Sevin Septoria tritici 13 days
TraesCS3B02G281500.3	14.25086846	-19.56164321	5.495724215	-3.559429558	0.000371661	0.018050388	cv Sevin Septoria tritici 13 days
TraesCS3B02G284900.1	354.6669896	-4.121227973	1.316391193	-3.130701568	0.001743893	0.049551919	cv Sevin Septoria tritici 13 days
TraesCS3B02G289900.1	23.57493583	-7.719758177	1.698669033	-4.544592281	5.50417E-06	0.002763608	cv Sevin Septoria tritici 4 days
TraesCS3B02G289900.1	23.57493583	-7.887725156	2.343998581	-3.365072497	0.000765235	0.028977803	cv Sevin Septoria tritici 13 days
TraesCS3B02G297900.2	18.99838262	-7.065589153	2.176728245	-3.245967506	0.001170522	0.038332958	cv Sevin Septoria tritici 13 days
TraesCS3B02G306000.1	1244.475045	-4.800476067	1.26821605	-3.785219456	0.000153573	0.010260991	cv Sevin Septoria tritici 13 days
TraesCS3B02G322800.2	176.6286971	-10.36138521	2.260569699	-4.58352831	4.57195E-06	0.010420069	cv Sevin Septoria tritici 10 days
TraesCS3B02G331600.1	651.6273597	-1.353278488	0.379039454	-3.570283978	0.000356594	0.017551402	cv Sevin Septoria tritici 13 days
TraesCS3B02G337600.3	57.60903899	-8.606233804	2.118129397	-4.063129389	4.84192E-05	0.033162125	cv Sevin Septoria tritici 10 days
TraesCS3B02G343800.10	37.38415106	-8.399766094	2.26163761	-3.714019459	0.000203993	0.012191978	cv Sevin Septoria tritici 13 days
TraesCS3B02G347600.1	77.67474933	-8.663235687	1.62276819	-5.338554045	9.36908E-08	0.000123373	cv Sevin Septoria tritici 4 days
TraesCS3B02G347600.1	77.67474933	-8.930496213	2.253502512	-3.96294043	7.40323E-05	0.043286492	cv Sevin Septoria tritici 10 days
TraesCS3B02G362100.1	2233.920415	-3.794420472	1.178047784	-3.220939358	0.001277712	0.040536622	cv Sevin Septoria tritici 13 days
TraesCS3B02G363000.1	87.02907494	-1.789461223	0.570503034	-3.136637522	0.001708973	0.04901071	cv Sevin Septoria tritici 13 days
TraesCS3B02G370200.3	219.5937466	-3.197899099	0.810417395	-3.945990202	7.94709E-05	0.006514544	cv Sevin Septoria tritici 13 days
TraesCS3B02G370800.1	132.5852028	-9.920949171	2.168955754	-4.574067107	4.78347E-06	0.010420069	cv Sevin Septoria tritici 10 days
TraesCS3B02G381100.1	111.3665762	-2.060973051	0.637011534	-3.23537792	0.001214818	0.039182657	cv Sevin Septoria tritici 13 days
TraesCS3B02G422500.1	87.99498166	-1.610156707	0.51427487	-3.130926282	0.001742559	0.049551919	cv Sevin Septoria tritici 13 days
TraesCS3B02G425900.1	423.2140676	-3.832102111	1.223450121	-3.132209516	0.00173496	0.049428581	cv Sevin Septoria tritici 13 days
TraesCS3B02G430400.1	19.68021595	-7.171573095	2.23082888	-3.214757151	0.001305549	0.041097994	cv Sevin Septoria tritici 13 days
TraesCS3B02G430900.1	711.626735	-1.481399494	0.361359152	-4.099521174	4.14006E-05	0.004141956	cv Sevin Septoria tritici 13 days
TraesCS3B02G432600.1	373.0297019	-4.061293802	0.974184254	-4.168917518	3.0605E-05	0.003371063	cv Sevin Septoria tritici 13 days
TraesCS3B02G448100.1	70.55219967	-5.087913976	1.333716381	-3.814839534	0.000136271	0.047316025	cv Sevin Septoria tritici 4 days
TraesCS3B02G483500.1	138.0985086	-10.37483744	2.296634137	-4.517409748	6.26007E-06	0.001020427	cv Sevin Septoria tritici 13 days
TraesCS3B02G483500.2	102.8821323	-9.86307525	2.176483814	-4.531655685	5.85232E-06	0.000965054	cv Sevin Septoria tritici 13 days
TraesCS3B02G483500.3	740.1389907	-2.480748303	0.601959942	-4.12111858	3.77037E-05	0.016045006	cv Sevin Septoria tritici 4 days
TraesCS3B02G483500.3	740.1389907	-2.67971565	0.778152913	-3.443687746	0.000573838	0.023899806	cv Sevin Septoria tritici 13 days
TraesCS3B02G486000.1	165.1386763	-2.593667277	0.50691126	-5.116610106	3.11076E-07	8.47727E-05	cv Sevin Septoria tritici 13 days
TraesCS3B02G546200.3	21.25767455	-21.5408256	3.955615786	-5.445631417	5.16219E-08	8.0061E-05	cv Sevin Septoria tritici 4 days
TraesCS3B02G546200.3	21.25767455	-20.30463083	5.173292965	-3.924894833	8.67676E-05	0.006931513	cv Sevin Septoria tritici 13 days
TraesCS3B02G550200.2	38.59235435	-8.426367441	2.229229737	-3.779945738	0.000156863	0.010419411	cv Sevin Septoria tritici 13 days
TraesCS3B02G555500.1	91.72905914	-1.894142037	0.584033234	-3.243209335	0.001181913	0.038527628	cv Sevin Septoria tritici 13 days
TraesCS3B02G592900.1	51.63093238	-4.398766119	1.265589602	-3.475665502	0.000509587	0.022078279	cv Sevin Septoria tritici 13 days
TraesCS3D02G010700.2	14.75771473	-7.06970469	1.717199324	-4.11699713	3.83841E-05	0.016120296	cv Sevin Septoria tritici 4 days
TraesCS3D02G027300.1	72.52136846	-2.655111057	0.660827856	-4.017855832	5.87301E-05	0.005313436	cv Sevin Septoria tritici 13 days
TraesCS3D02G038500.1	375.7281495	-2.471449194	0.59867039	-4.128230215	3.65566E-05	0.00379106	cv Sevin Septoria tritici 13 days
TraesCS3D02G052100.1	3542.872897	-1.786910876	0.454617559	-3.930580424	8.4741E-05	0.006828154	cv Sevin Septoria tritici 13 days
TraesCS3D02G059900.1	962.9801884	-4.100071913	1.24401742	-3.29583159	0.000981308	0.03406713	cv Sevin Septoria tritici 13 days
TraesCS3D02G060400.2	23.97973592	-7.018633408	1.564890827	-4.485062657	7.28925E-06	0.003484412	cv Sevin Septoria tritici 4 days
TraesCS3D02G060600.1	506.7711566	-3.946233278	0.974046169	-4.051382168	5.0916E-05	0.004829865	cv Sevin Septoria tritici 13 days
TraesCS3D02G081300.1	529.4813241	-7.16204329	0.940492642	-7.615203957	2.63275E-14	1.14881E-10	cv Sevin Septoria tritici 13 days
TraesCS3D02G084300.1	94.46435135	-3.971410899	1.207327515	-3.289423002	0.00100393	0.034535443	cv Sevin Septoria tritici 13 days
TraesCS3D02G087600.1	375.7436102	-4.014018085	1.283101659	-3.128371051	0.001757781	0.049652712	cv Sevin Septoria tritici 13 days
TraesCS3D02G093400.1	35.94455943	-7.795114492	2.201423668	-3.540942438	0.000398701	0.018769035	cv Sevin Septoria tritici 13 days
TraesCS3D02G102300.1	107.8355201	-10.04813904	2.318739596	-4.333448678	1.46792E-05	0.00195467	cv Sevin Septoria tritici 13 days
TraesCS3D02G105900.1	134.9510827	-6.327406101	1.70541807	-3.710178878	0.000207113	0.012315182	cv Sevin Septoria tritici 13 days
TraesCS3D02G120000.1	392.0472767	-3.392729372	0.467978143	-7.249760314	4.1751E-13	1.24651E-09	cv Sevin Septoria tritici 13 days
TraesCS3D02G136800.1	591.9855493	-1.89559372	0.393569181	-4.816418083	1.46158E-06	0.000314052	cv Sevin Septoria tritici 13 days
TraesCS3D02G137700.1	70.73246899	-4.066145305	0.802353407	-5.067773462	4.02496E-07	0.000105217	cv Sevin Septoria tritici 13 days
TraesCS3D02G156700.3	313.9590029	-1.223661188	0.367896648	-3.326100398	0.000880702	0.031659507	cv Sevin Septoria tritici 13 days
TraesCS3D02G160600.1	333.5166962	-3.32596599	0.731720055	-4.545407726	5.4829E-06	0.010420069	cv Sevin Septoria tritici 10 days
TraesCS3D02G176600.2	100.9895521	-4.851912162	1.09733802	-4.421529261	9.80048E-06	0.001421846	cv Sevin Septoria tritici 13 days
TraesCS3D02G180600.1	238.615211	-1.924851742	0.463176554	-4.15576247	3.24205E-05	0.003509699	cv Sevin Septoria tritici 13 days
TraesCS3D02G194300.1	4868.778661	-3.158070515	0.502288742	-6.287360734	3.22908E-10	3.10326E-07	cv Sevin Septoria tritici 13 days
TraesCS3D02G195600.5	12.47943579	-22.19454146	4.086278695	-5.431480111	5.58885E-08	8.3333E-05	cv Sevin Septoria tritici 4 days
TraesCS3D02G195600.5	12.47943579	-18.85135433	5.339001067	-3.530876673	0.000414185	0.019242463	cv Sevin Septoria tritici 13 days
TraesCS3D02G195600.7	7.823001274	-20.40756555	4.209955411	-4.847454083	1.25056E-06	0.00089059	cv Sevin Septoria tritici 4 days
TraesCS3D02G196700.4	82.4885769	-8.820080494	2.386180576	-3.696317279	0.00021875	0.012818996	cv Sevin Septoria tritici 13 days
TraesCS3D02G210000.1	82.71202003	-9.630156896	2.273295317	-4.236210238	2.27324E-05	0.002675348	cv Sevin Septoria tritici 13 days
TraesCS3D02G210300.2	312.9741153	-2.202289579	0.621669148	-3.542542822	0.000396289	0.018704142	cv Sevin Septoria tritici 13 days
TraesCS3D02G211700.1	91.08817426	-5.736787983	1.345941432	-4.26228649	2.02346E-05	0.002494899	cv Sevin Septoria tritici 13 days
TraesCS3D02G214100.3	75.984937	-9.278344097	2.848910442	-3.256804413	0.00112674	0.037225088	cv Sevin Septoria tritici 13 days
TraesCS3D02G223300.4	905.8685466	-17.24461875	5.507890025	-3.130893803	0.001742752	0.049551919	cv Sevin Septoria tritici 13 days
TraesCS3D02G227500.1	7.477868865	-20.41375764	4.210135265	-4.848717763	1.24262E-06	0.00089059	cv Sevin Septoria tritici 4 days
TraesCS3D02G231000.1	140.8773554	-3.552194408	1.133358012	-3.134220936	0.001723111	0.049215831	cv Sevin Septoria tritici 13 days
TraesCS3D02G240800.1	1867.421917	-2.772149891	0.876078206	-3.164272177	0.001554713	0.046241881	cv Sevin Septoria tritici 13 days
TraesCS3D02G241000.1	126.6998034	-4.300413755	1.151294989	-3.735284005	0.000187503	0.011599042	cv Sevin Septoria tritici 13 days
TraesCS3D02G253900.3	215.585941	-4.630137859	1.429497576	-3.23899665	0.00119951	0.038855693	cv Sevin Septoria tritici 13 days
TraesCS3D02G256700.2	615.7937764	-1.948837122	0.549281603	-3.5479745	0.000388206	0.018525438	cv Sevin Septoria tritici 13 days
TraesCS3D02G258200.2	83.69678307	-9.464421774	2.852680437	-3.317729407	0.000907524	0.032279411	cv Sevin Septoria tritici 13 days
TraesCS3D02G258200.3	695.0876161	-2.372171126	0.609989754	-3.888870449	0.000100712	0.007608986	cv Sevin Septoria tritici 13 days
TraesCS3D02G258500.1	75.34688801	-2.658769565	0.625095732	-4.253379805	2.10568E-05	0.002541421	cv Sevin Septoria tritici 13 days
TraesCS3D02G262600.10	39.11715117	-8.26989349	2.066588892	-4.001711962	6.28858E-05	0.024629962	cv Sevin Septoria tritici 4 days
TraesCS3D02G266400.1	110.9443789	-9.588788416	2.288059198	-4.190795598	2.77978E-05	0.024255342	cv Sevin Septoria tritici 10 days
TraesCS3D02G266400.1	110.9443789	-9.489493895	2.288059198	-4.147398766	3.36274E-05	0.003599148	cv Sevin Septoria tritici 13 days
TraesCS3D02G271800.1	1194.040957	-4.655563958	1.304016436	-3.570172759	0.000356746	0.017551402	cv Sevin Septoria tritici 13 days
TraesCS3D02G281100.1	469.0536206	-1.845228201	0.537455396	-3.433267609	0.000596353	0.024538205	cv Sevin Septoria tritici 13 days
TraesCS3D02G302500.2	116.6958699	-9.851237931	2.084539783	-4.725857482	2.29146E-06	0.007886707	cv Sevin Septoria tritici 10 days
TraesCS3D02G304800.1	102.7485879	-4.361343697	1.391385605	-3.134532715	0.001721281	0.049215831	cv Sevin Septoria tritici 13 days
TraesCS3D02G307700.5	26.01168348	-7.496301862	2.396596724	-3.127894562	0.001760633	0.049658214	cv Sevin Septoria tritici 13 days
TraesCS3D02G321900.1	167.5278946	-2.926734687	0.852289525	-3.433967685	0.000594815	0.024521426	cv Sevin Septoria tritici 13 days
TraesCS3D02G325800.1	1583.651871	-4.940124085	1.344296488	-3.67487688	0.000237964	0.013607615	cv Sevin Septoria tritici 13 days
TraesCS3D02G326100.1	148.8050798	-2.684849179	0.63476378	-4.229682384	2.34021E-05	0.002737135	cv Sevin Septoria tritici 13 days
TraesCS3D02G341400.1	88.53182652	-5.711385817	1.634690962	-3.493862723	0.000476086	0.021098782	cv Sevin Septoria tritici 13 days
TraesCS3D02G369700.1	7.93804541	-20.17726221	4.209899209	-4.792813605	1.64458E-06	0.0009803	cv Sevin Septoria tritici 4 days
TraesCS3D02G390900.1	24.11675148	-5.446512168	1.690294017	-3.22222768	0.00127198	0.04039997	cv Sevin Septoria tritici 13 days
TraesCS3D02G392600.1	1137.282063	-1.168120063	0.373780982	-3.125145792	0.00177717	0.049956254	cv Sevin Septoria tritici 13 days
TraesCS3D02G393700.2	350.8782737	-3.939298999	1.16626006	-3.377719201	0.000730897	0.028281616	cv Sevin Septoria tritici 13 days
TraesCS3D02G397700.1	27.13953923	-6.934071645	1.746348367	-3.970611921	7.16883E-05	0.027339869	cv Sevin Septoria tritici 4 days
TraesCS3D02G411200.6	13.46646905	-19.49754007	5.495814468	-3.547707112	0.0003886	0.018525438	cv Sevin Septoria tritici 13 days
TraesCS3D02G418400.4	126.4397092	-10.1489558	2.761463261	-3.675209424	0.000237654	0.013607615	cv Sevin Septoria tritici 13 days
TraesCS3D02G426300.1	567.9719216	-1.9479483	0.581155027	-3.351856577	0.000802716	0.029781885	cv Sevin Septoria tritici 13 days
TraesCS3D02G431500.2	23.76776814	-7.638338468	2.345130062	-3.257106543	0.001125542	0.037207158	cv Sevin Septoria tritici 13 days
TraesCS3D02G440200.1	49.71461219	-8.873056511	2.274989063	-3.90026337	9.60881E-05	0.007436144	cv Sevin Septoria tritici 13 days
TraesCS3D02G440200.2	265.2870831	-2.608598003	0.464382812	-5.617344002	1.93915E-08	3.65771E-05	cv Sevin Septoria tritici 4 days
TraesCS3D02G440200.2	265.2870831	-2.80082534	0.60159137	-4.655694012	3.22891E-06	0.009092616	cv Sevin Septoria tritici 10 days
TraesCS3D02G440200.2	265.2870831	-6.005308723	0.771839266	-7.780517253	7.22286E-15	4.55249E-11	cv Sevin Septoria tritici 13 days
TraesCS3D02G440200.3	531.8846017	-7.088507296	0.958313537	-7.396856062	1.39447E-13	4.39458E-10	cv Sevin Septoria tritici 13 days
TraesCS3D02G442000.2	124.5694202	-3.35686527	0.604876955	-5.549666329	2.86215E-08	1.19381E-05	cv Sevin Septoria tritici 13 days
TraesCS3D02G446700.1	16.75618857	-23.26122548	3.897082265	-5.968882334	2.38884E-09	1.3859E-05	cv Sevin Septoria tritici 4 days
TraesCS3D02G513700.1	43.69202441	-2.722694356	0.838582611	-3.246781319	0.00116718	0.038271371	cv Sevin Septoria tritici 13 days
TraesCS3D02G518200.1	455.2450912	-6.369326804	1.379190716	-4.618162471	3.87153E-06	0.00198675	cv Sevin Septoria tritici 4 days
TraesCS3D02G530600.2	121.8089902	-6.026810962	1.483124536	-4.063590627	4.83235E-05	0.004646104	cv Sevin Septoria tritici 13 days
TraesCS3D02G543400.4	60.76888689	-3.001980745	0.881741581	-3.404603807	0.000662601	0.026376639	cv Sevin Septoria tritici 13 days
TraesCS4A02G005500.1	65.80215821	-5.005615991	1.318294888	-3.797038156	0.000146435	0.049610985	cv Sevin Septoria tritici 4 days
TraesCS4A02G065400.1	695.1088825	-4.037777285	1.208605058	-3.340857509	0.000835201	0.030566192	cv Sevin Septoria tritici 13 days
TraesCS4A02G081000.1	85.06411705	-3.840984701	1.008454249	-3.808784292	0.000139652	0.009579061	cv Sevin Septoria tritici 13 days
TraesCS4A02G095200.1	197.4560531	-3.147696952	0.841266037	-3.741618959	0.000182839	0.011422579	cv Sevin Septoria tritici 13 days
TraesCS4A02G101500.1	397.2194364	-2.353304888	0.487231496	-4.829952306	1.36566E-06	0.000295681	cv Sevin Septoria tritici 13 days
TraesCS4A02G116200.1	20.67396223	-7.180137645	2.226134894	-3.225383001	0.001258042	0.040069464	cv Sevin Septoria tritici 13 days
TraesCS4A02G123300.1	81.0989991	-9.799470563	2.722277395	-3.599732555	0.000318545	0.016229641	cv Sevin Septoria tritici 13 days
TraesCS4A02G124200.1	50.40297847	-8.79304149	2.199994449	-3.996847126	6.41917E-05	0.005610693	cv Sevin Septoria tritici 13 days
TraesCS4A02G125600.4	28.89038079	-3.978579381	1.046595933	-3.801447394	0.000143853	0.048973973	cv Sevin Septoria tritici 4 days
TraesCS4A02G126800.4	112.2252554	-2.545718549	0.625389211	-4.070614752	4.68892E-05	0.004546733	cv Sevin Septoria tritici 13 days
TraesCS4A02G133700.2	16.79627054	-19.89630065	5.49514809	-3.620703268	0.000293803	0.015532421	cv Sevin Septoria tritici 13 days
TraesCS4A02G134100.1	302.8288023	-1.919378254	0.6046867	-3.174169788	0.001502658	0.045285653	cv Sevin Septoria tritici 13 days
TraesCS4A02G139700.1	298.3850868	-7.435942294	1.464006409	-5.079173319	3.79081E-07	9.95543E-05	cv Sevin Septoria tritici 13 days
TraesCS4A02G149800.2	559.6941739	-3.129995106	0.977696609	-3.201397116	0.001367629	0.042439894	cv Sevin Septoria tritici 13 days
TraesCS4A02G151800.1	8.168133683	-23.35430413	4.209790434	-5.547616799	2.8959E-08	5.05269E-05	cv Sevin Septoria tritici 4 days
TraesCS4A02G157300.1	403.2393547	-5.39200294	1.29696945	-4.157386236	3.21909E-05	0.003505709	cv Sevin Septoria tritici 13 days
TraesCS4A02G166200.3	15.93752411	-20.68418691	4.034009247	-5.127451537	2.93691E-07	0.000345923	cv Sevin Septoria tritici 4 days
TraesCS4A02G166200.3	15.93752411	-20.28264096	5.272947326	-3.846547236	0.000119794	0.008634609	cv Sevin Septoria tritici 13 days
TraesCS4A02G167000.1	806.6532278	-3.009874525	0.913510563	-3.294843701	0.000984764	0.034166204	cv Sevin Septoria tritici 13 days
TraesCS4A02G177800.3	56.28445641	-8.900870768	2.128846236	-4.181077345	2.90131E-05	0.024964173	cv Sevin Septoria tritici 10 days
TraesCS4A02G178100.5	97.68019179	-9.325296984	2.214597734	-4.210831088	2.54433E-05	0.0228567	cv Sevin Septoria tritici 10 days
TraesCS4A02G188300.3	114.0215023	-2.143509368	0.585821111	-3.658982797	0.000253218	0.014110082	cv Sevin Septoria tritici 13 days
TraesCS4A02G190400.2	25.26064843	-7.604857663	2.224613579	-3.418507257	0.000629656	0.025494567	cv Sevin Septoria tritici 13 days
TraesCS4A02G203000.1	143.3169465	-2.693870415	0.685083334	-3.93217917	8.41793E-05	0.006811698	cv Sevin Septoria tritici 13 days
TraesCS4A02G204100.1	57.45218166	-2.304159985	0.63594849	-3.623186502	0.000290996	0.015470506	cv Sevin Septoria tritici 13 days
TraesCS4A02G206400.1	14408.71183	-1.66939942	0.522644562	-3.194139078	0.001402485	0.043214222	cv Sevin Septoria tritici 13 days
TraesCS4A02G218400.1	544.4970226	-9.31450138	2.139472751	-4.353643381	1.33893E-05	0.00180839	cv Sevin Septoria tritici 13 days
TraesCS4A02G221700.2	7.707957138	-20.09051721	4.210013681	-4.772078841	1.82334E-06	0.001032604	cv Sevin Septoria tritici 4 days
TraesCS4A02G236200.1	45.18616713	-6.02944806	1.801514491	-3.346877358	0.000817274	0.030143473	cv Sevin Septoria tritici 13 days
TraesCS4A02G243100.3	97.91763015	-4.238559073	0.878882582	-4.822668196	1.4165E-06	0.006750409	cv Sevin Septoria tritici 10 days
TraesCS4A02G245100.1	60.84980578	-4.284284063	1.291341735	-3.317699682	0.00090762	0.032279411	cv Sevin Septoria tritici 13 days
TraesCS4A02G245300.1	205.2205569	-3.330818211	0.594463062	-5.603070107	2.10588E-08	9.40615E-06	cv Sevin Septoria tritici 13 days
TraesCS4A02G268700.2	221.2008948	-10.24812784	2.268943242	-4.516696429	6.28119E-06	0.010795835	cv Sevin Septoria tritici 10 days
TraesCS4A02G272100.1	794.9921165	-3.986766163	1.216787489	-3.276468732	0.00105114	0.035619438	cv Sevin Septoria tritici 13 days
TraesCS4A02G286600.1	191.223423	-2.49152898	0.640968124	-3.88713399	0.000101435	0.007631285	cv Sevin Septoria tritici 13 days
TraesCS4A02G298100.1	260.3083655	-3.350411595	0.924284448	-3.624870678	0.000289106	0.015427185	cv Sevin Septoria tritici 13 days
TraesCS4A02G317800.4	19.44876701	-19.13767092	4.764255462	-4.016927949	5.89617E-05	0.005325898	cv Sevin Septoria tritici 13 days
TraesCS4A02G320200.1	185.2210355	-5.932595938	0.980325878	-6.051656977	1.43363E-09	1.12951E-06	cv Sevin Septoria tritici 13 days
TraesCS4A02G320200.2	105.3602269	-2.934817703	0.776477759	-3.779654559	0.000157046	0.010419411	cv Sevin Septoria tritici 13 days
TraesCS4A02G334400.1	221.2902944	-1.531482969	0.449060495	-3.410415711	0.000648639	0.026040136	cv Sevin Septoria tritici 13 days
TraesCS4A02G342300.1	243.4073392	-1.415531091	0.357359273	-3.961086776	7.46094E-05	0.028146299	cv Sevin Septoria tritici 4 days
TraesCS4A02G342300.1	243.4073392	-2.509932835	0.478125832	-5.249523588	1.52493E-07	4.67585E-05	cv Sevin Septoria tritici 13 days
TraesCS4A02G342300.2	73.37500877	-3.167777166	0.82532961	-3.838196436	0.000123941	0.008832531	cv Sevin Septoria tritici 13 days
TraesCS4A02G342400.2	9.387194103	-20.2442137	4.209306543	-4.809394016	1.51389E-06	0.000952963	cv Sevin Septoria tritici 4 days
TraesCS4A02G342400.2	9.387194103	-19.47343209	5.495932905	-3.543244146	0.000395237	0.018704142	cv Sevin Septoria tritici 13 days
TraesCS4A02G342800.1	656.8475407	-3.462802642	0.902296938	-3.837763928	0.00012416	0.008836997	cv Sevin Septoria tritici 13 days
TraesCS4A02G357400.1	121.9431714	-2.105609973	0.623095143	-3.379275215	0.000726772	0.028160434	cv Sevin Septoria tritici 13 days
TraesCS4A02G364900.1	22.6522389	-19.25403774	4.721440712	-4.078000534	4.54247E-05	0.004427422	cv Sevin Septoria tritici 13 days
TraesCS4A02G368800.1	943.0546125	-3.872082109	1.086748401	-3.562997752	0.000366644	0.017883265	cv Sevin Septoria tritici 13 days
TraesCS4A02G376600.1	80.2114148	-8.979731878	2.241641716	-4.005872933	6.17889E-05	0.005447272	cv Sevin Septoria tritici 13 days
TraesCS4A02G386400.1	69.46028552	-2.113946788	0.661497501	-3.195698825	0.001394926	0.043087162	cv Sevin Septoria tritici 13 days
TraesCS4A02G398700.1	206.6689051	-3.189279717	0.581353561	-5.48595542	4.11241E-08	1.56564E-05	cv Sevin Septoria tritici 13 days
TraesCS4A02G399300.1	148.5374778	-4.842729295	0.860839815	-5.625587029	1.84878E-08	8.45758E-06	cv Sevin Septoria tritici 13 days
TraesCS4A02G406300.1	60.58503647	-8.450743999	2.379281762	-3.551804639	0.000382599	0.018435539	cv Sevin Septoria tritici 13 days
TraesCS4A02G426900.1	34.48880649	-3.408998569	1.051427152	-3.242258451	0.001185864	0.038593997	cv Sevin Septoria tritici 13 days
TraesCS4A02G431300.1	143.4553231	-5.482905652	1.506913863	-3.638499711	0.000274231	0.014929006	cv Sevin Septoria tritici 13 days
TraesCS4A02G445600.1	466.995991	-2.272316484	0.412351159	-5.510634401	3.57543E-08	1.40847E-05	cv Sevin Septoria tritici 13 days
TraesCS4A02G494400.1	242.5995592	-4.413947896	1.314251747	-3.358525417	0.000783595	0.029378862	cv Sevin Septoria tritici 13 days
TraesCS4A02G495800.1	9.89461	-18.44057893	5.495804946	-3.355391815	0.000792526	0.02953392	cv Sevin Septoria tritici 13 days
TraesCS4B02G028000.1	116.8315743	-6.276954544	1.403768018	-4.471504167	7.76713E-06	0.001197278	cv Sevin Septoria tritici 13 days
TraesCS4B02G028100.1	405.2475056	-2.206794293	0.502451424	-4.392055011	1.12284E-05	0.001592359	cv Sevin Septoria tritici 13 days
TraesCS4B02G043700.1	275.3667871	-2.427265459	0.674619337	-3.597977892	0.000320701	0.016257442	cv Sevin Septoria tritici 13 days
TraesCS4B02G051600.1	189.3658207	-3.28726488	1.001489812	-3.282374758	0.001029367	0.035049143	cv Sevin Septoria tritici 13 days
TraesCS4B02G070300.1	126.296925	-3.694181857	1.032330077	-3.578489032	0.000345586	0.017193326	cv Sevin Septoria tritici 13 days
TraesCS4B02G083400.1	243.622231	-2.48239102	0.777694527	-3.191987257	0.001412976	0.043466626	cv Sevin Septoria tritici 13 days
TraesCS4B02G088800.4	117.6461506	-9.355598304	2.114264022	-4.424990544	9.64465E-06	0.014226319	cv Sevin Septoria tritici 10 days
TraesCS4B02G117800.1	204.1436607	-4.987140817	1.280913704	-3.893424514	9.8839E-05	0.00753594	cv Sevin Septoria tritici 13 days
TraesCS4B02G117900.2	661.5738288	-2.150259639	0.687100085	-3.129470782	0.001751215	0.049551919	cv Sevin Septoria tritici 13 days
TraesCS4B02G125700.2	31.80780077	-7.68565269	1.569218698	-4.897757528	9.69365E-07	0.000805393	cv Sevin Septoria tritici 4 days
TraesCS4B02G126300.3	12.70965898	-19.7460915	5.495443314	-3.593175359	0.000326673	0.016442617	cv Sevin Septoria tritici 13 days
TraesCS4B02G131700.2	31.23699545	-8.208751627	2.150211478	-3.817648501	0.00013473	0.047139917	cv Sevin Septoria tritici 4 days
TraesCS4B02G135400.1	15.15670198	-7.121345163	2.214072614	-3.216400906	0.001298094	0.040976992	cv Sevin Septoria tritici 13 days
TraesCS4B02G148000.2	29.73301715	-8.099425547	1.784247679	-4.53940652	5.64128E-06	0.002812218	cv Sevin Septoria tritici 4 days
TraesCS4B02G148000.2	29.73301715	-8.267389843	2.448075907	-3.377097017	0.000732552	0.028288371	cv Sevin Septoria tritici 13 days
TraesCS4B02G148000.4	68.36154445	-9.240660355	2.68272622	-3.444503686	0.000572109	0.023845294	cv Sevin Septoria tritici 13 days
TraesCS4B02G170800.1	185.6307261	-4.931607888	1.402392966	-3.516566331	0.000437167	0.02001514	cv Sevin Septoria tritici 13 days
TraesCS4B02G171200.1	76.97958595	-2.465581383	0.582382821	-4.233609395	2.2997E-05	0.002695308	cv Sevin Septoria tritici 13 days
TraesCS4B02G172600.2	21.18329362	-3.924740663	1.026874312	-3.822026334	0.00013236	0.046754079	cv Sevin Septoria tritici 4 days
TraesCS4B02G175900.1	265.7589136	-3.193148675	0.769221017	-4.151145907	3.30815E-05	0.003565323	cv Sevin Septoria tritici 13 days
TraesCS4B02G179400.1	2290.09717	-2.99960514	0.912227128	-3.288221811	0.001008224	0.034622174	cv Sevin Septoria tritici 13 days
TraesCS4B02G180200.1	199.4336606	-3.604942917	0.592952603	-6.079647683	1.20447E-09	9.6232E-07	cv Sevin Septoria tritici 13 days
TraesCS4B02G181000.2	569.5144215	-1.961070969	0.435054166	-4.507647831	6.55503E-06	0.010795835	cv Sevin Septoria tritici 10 days
TraesCS4B02G181000.2	569.5144215	-1.357303463	0.431758619	-3.143662691	0.001668476	0.048182954	cv Sevin Septoria tritici 13 days
TraesCS4B02G182200.1	51.71842639	-4.414238837	1.022798057	-4.315845933	1.58993E-05	0.002078117	cv Sevin Septoria tritici 13 days
TraesCS4B02G185800.1	58.7792204	-8.941947115	2.244914181	-3.983202204	6.79929E-05	0.041296995	cv Sevin Septoria tritici 10 days
TraesCS4B02G185800.1	58.7792204	-8.842652579	2.244914181	-3.938971321	8.18317E-05	0.006679116	cv Sevin Septoria tritici 13 days
TraesCS4B02G196800.1	229.4568092	-10.90523207	2.142146872	-5.090795693	3.56564E-07	0.002454429	cv Sevin Septoria tritici 10 days
TraesCS4B02G196800.1	229.4568092	-10.8059375	2.142146872	-5.044442862	4.54845E-07	0.000115702	cv Sevin Septoria tritici 13 days
TraesCS4B02G201800.3	16.19784141	-19.51861067	4.212750028	-4.633223083	3.60016E-06	0.00065456	cv Sevin Septoria tritici 13 days
TraesCS4B02G203100.2	277.0522363	-3.307895627	0.470996745	-7.023181503	2.16872E-12	4.73165E-09	cv Sevin Septoria tritici 13 days
TraesCS4B02G209300.1	93.1715715	-3.146586327	0.837377556	-3.757667382	0.000171505	0.010918936	cv Sevin Septoria tritici 13 days
TraesCS4B02G213600.1	629.6609663	-3.619041766	1.107001482	-3.269229378	0.001078408	0.03611204	cv Sevin Septoria tritici 13 days
TraesCS4B02G215100.1	71.56141949	-5.8869419	0.963856153	-6.10769759	1.01079E-09	8.13425E-06	cv Sevin Septoria tritici 4 days
TraesCS4B02G223000.1	98.86656436	-3.824800689	0.96333702	-3.970366145	7.17623E-05	0.006030794	cv Sevin Septoria tritici 13 days
TraesCS4B02G228300.2	24.82054589	-20.0431768	5.495040457	-3.647503046	0.000264801	0.01455534	cv Sevin Septoria tritici 13 days
TraesCS4B02G233300.1	77.37532853	-2.554708585	0.703289472	-3.632513621	0.000280674	0.015134505	cv Sevin Septoria tritici 13 days
TraesCS4B02G234800.1	29.40019039	-4.098521583	1.20547939	-3.399910125	0.00067408	0.026739766	cv Sevin Septoria tritici 13 days
TraesCS4B02G242800.1	1028.890725	-3.9706267	1.146406178	-3.463542657	0.000533112	0.022806421	cv Sevin Septoria tritici 13 days
TraesCS4B02G250800.2	99.41159394	-9.867252955	2.267516562	-4.351568197	1.35167E-05	0.016508538	cv Sevin Septoria tritici 10 days
TraesCS4B02G250800.2	99.41159394	-9.767958427	2.267516562	-4.307778207	1.64903E-05	0.002130812	cv Sevin Septoria tritici 13 days
TraesCS4B02G263000.1	297.4859493	-2.405828685	0.480110793	-5.010986462	5.41517E-07	0.000130715	cv Sevin Septoria tritici 13 days
TraesCS4B02G263200.1	52.19988458	-3.345259294	1.053294615	-3.175995818	0.001493231	0.045127876	cv Sevin Septoria tritici 13 days
TraesCS4B02G281400.2	88.05704181	-8.364425091	2.569991486	-3.254650895	0.001135318	0.037399574	cv Sevin Septoria tritici 13 days
TraesCS4B02G293600.1	41.77007179	-8.536297179	2.652420327	-3.218304842	0.001289507	0.040774007	cv Sevin Septoria tritici 13 days
TraesCS4B02G305800.1	123.8582942	-5.340543925	1.132111653	-4.7173297	2.3896E-06	0.00046904	cv Sevin Septoria tritici 13 days
TraesCS4B02G313900.3	11.91290133	-21.99375452	4.208618115	-5.225885058	1.73324E-07	0.000219936	cv Sevin Septoria tritici 4 days
TraesCS4B02G313900.3	11.91290133	-21.71485488	5.495405686	-3.951456202	7.76771E-05	0.04455788	cv Sevin Septoria tritici 10 days
TraesCS4B02G313900.3	11.91290133	-21.71161463	5.495405686	-3.950866573	7.78687E-05	0.006419481	cv Sevin Septoria tritici 13 days
TraesCS4B02G320500.3	14.17218	-7.088058101	1.741665234	-4.06970178	4.70734E-05	0.019100561	cv Sevin Septoria tritici 4 days
TraesCS4B02G331800.2	128.5405392	-4.327205697	1.2492228	-3.463918282	0.000532368	0.022793111	cv Sevin Septoria tritici 13 days
TraesCS4B02G339200.1	172.3177551	-2.90518273	0.879351591	-3.30377833	0.000953912	0.033443527	cv Sevin Septoria tritici 13 days
TraesCS4B02G347400.1	639.9288288	-3.84039118	1.168350501	-3.287019758	0.001012537	0.034696617	cv Sevin Septoria tritici 13 days
TraesCS4B02G348600.1	2739.487521	-1.805835329	0.416805289	-4.33256337	1.47383E-05	0.016776617	cv Sevin Septoria tritici 10 days
TraesCS4B02G348600.1	2739.487521	-2.649518084	0.41862211	-6.329140335	2.46531E-10	2.4747E-07	cv Sevin Septoria tritici 13 days
TraesCS4B02G348800.1	64.13897659	-3.203307595	0.782574686	-4.093293143	4.25289E-05	0.004217652	cv Sevin Septoria tritici 13 days
TraesCS4B02G363700.1	424.3095818	-3.909779651	1.084227959	-3.606049466	0.000310894	0.016017954	cv Sevin Septoria tritici 13 days
TraesCS4B02G365600.2	31.66308642	-7.992555137	2.549755819	-3.134635512	0.001720678	0.049215831	cv Sevin Septoria tritici 13 days
TraesCS4D02G011300.5	62.61087685	-8.86585759	2.813730076	-3.150926831	0.001627533	0.047442658	cv Sevin Septoria tritici 13 days
TraesCS4D02G014800.3	75.46444794	-8.904527367	2.234818733	-3.98445173	6.76361E-05	0.041296995	cv Sevin Septoria tritici 10 days
TraesCS4D02G025500.1	182.8320245	-3.624586225	0.656153055	-5.523995049	3.31377E-08	1.35108E-05	cv Sevin Septoria tritici 13 days
TraesCS4D02G025700.1	242.9090593	-2.042397924	0.462216493	-4.418704126	9.92945E-06	0.001429588	cv Sevin Septoria tritici 13 days
TraesCS4D02G026200.1	24.91076649	-7.571534555	2.420650966	-3.127891903	0.001760649	0.049658214	cv Sevin Septoria tritici 13 days
TraesCS4D02G036000.1	50.72048786	-8.599741953	2.117989308	-4.060333034	4.90028E-05	0.004687574	cv Sevin Septoria tritici 13 days
TraesCS4D02G036500.4	20.8281441	-7.0867951	2.207251348	-3.210687856	0.001324177	0.041546049	cv Sevin Septoria tritici 13 days
TraesCS4D02G039100.1	703.9948096	-3.20753628	0.898124918	-3.571369877	0.000355119	0.017501719	cv Sevin Septoria tritici 13 days
TraesCS4D02G045400.1	377.6225866	-2.965212381	0.757847143	-3.912678707	9.12779E-05	0.007132001	cv Sevin Septoria tritici 13 days
TraesCS4D02G052400.1	52.90395909	-20.52736806	4.208556463	-4.877531818	1.07422E-06	0.000842366	cv Sevin Septoria tritici 4 days
TraesCS4D02G073600.1	292.0055783	-4.802768441	1.272084937	-3.775509246	0.000159681	0.010506235	cv Sevin Septoria tritici 13 days
TraesCS4D02G084400.3	37.22970549	-7.998440476	2.247507643	-3.558804572	0.000372547	0.018077911	cv Sevin Septoria tritici 13 days
TraesCS4D02G085700.4	31.11114797	-19.86270909	5.495288813	-3.614497757	0.00030093	0.015688844	cv Sevin Septoria tritici 13 days
TraesCS4D02G087100.2	12.22065628	-19.2898113	4.174721703	-4.620622084	3.82591E-06	0.00068898	cv Sevin Septoria tritici 13 days
TraesCS4D02G093600.1	269.9219636	-10.22200588	2.715522734	-3.764286615	0.000167025	0.010764926	cv Sevin Septoria tritici 13 days
TraesCS4D02G104100.3	7.611238462	-20.2715186	4.210066158	-4.815011887	1.47191E-06	0.000942442	cv Sevin Septoria tritici 4 days
TraesCS4D02G115500.1	255.7638235	-4.928322708	1.372095494	-3.591821946	0.000328374	0.016492411	cv Sevin Septoria tritici 13 days
TraesCS4D02G119200.2	358.6746584	-4.656136584	1.315887372	-3.538400538	0.000402559	0.018856777	cv Sevin Septoria tritici 13 days
TraesCS4D02G127500.1	34.05856847	-4.664462673	1.056339304	-4.415685998	1.0069E-05	0.004748153	cv Sevin Septoria tritici 4 days
TraesCS4D02G135000.4	378.8360175	-11.54987578	2.367585575	-4.878335084	1.06985E-06	0.000239875	cv Sevin Septoria tritici 13 days
TraesCS4D02G145100.12	20.86909672	-20.0004925	4.839661916	-4.132621833	3.58649E-05	0.003753634	cv Sevin Septoria tritici 13 days
TraesCS4D02G147700.6	177.9831575	-1.946289165	0.47186778	-4.124649419	3.713E-05	0.029490731	cv Sevin Septoria tritici 10 days
TraesCS4D02G150900.2	78.27379833	-9.131470194	2.101061992	-4.346121261	1.38566E-05	0.016508538	cv Sevin Septoria tritici 10 days
TraesCS4D02G153200.3	26.95843054	-20.5869122	4.20855515	-4.891681697	9.9978E-07	0.000811345	cv Sevin Septoria tritici 4 days
TraesCS4D02G154300.2	8.28317782	-20.07714581	4.209738509	-4.769214469	1.84946E-06	0.001032604	cv Sevin Septoria tritici 4 days
TraesCS4D02G154500.1	144.6503685	-4.603087635	1.402255871	-3.282630318	0.001028434	0.03503842	cv Sevin Septoria tritici 13 days
TraesCS4D02G165100.1	15.87127834	-6.978176209	2.218593141	-3.145315867	0.001659076	0.048032697	cv Sevin Septoria tritici 13 days
TraesCS4D02G166200.1	277.6304247	-1.18238642	0.353988077	-3.340187129	0.00083722	0.030600591	cv Sevin Septoria tritici 13 days
TraesCS4D02G168600.1	75.4982472	-9.03962042	2.147912167	-4.208561486	2.57002E-05	0.0228567	cv Sevin Septoria tritici 10 days
TraesCS4D02G181000.1	2265.032966	-2.543761335	0.806132271	-3.155513587	0.001602158	0.047042899	cv Sevin Septoria tritici 13 days
TraesCS4D02G182600.2	97.95612227	-18.2737364	5.499493076	-3.322803784	0.000891176	0.031884096	cv Sevin Septoria tritici 13 days
TraesCS4D02G192000.1	12.05764263	-6.581564147	1.66712203	-3.947859862	7.88529E-05	0.029587233	cv Sevin Septoria tritici 4 days
TraesCS4D02G193100.1	58.28817889	-3.022958667	0.7148805	-4.228620962	2.35128E-05	0.022563384	cv Sevin Septoria tritici 10 days
TraesCS4D02G195800.1	178.2074382	-4.253831752	1.164076512	-3.654254431	0.00025793	0.014302404	cv Sevin Septoria tritici 13 days
TraesCS4D02G204000.2	257.5411791	-3.266572403	0.610397722	-5.351547498	8.72052E-08	2.94425E-05	cv Sevin Septoria tritici 13 days
TraesCS4D02G214300.1	468.8367791	-4.566146364	1.310576193	-3.484075469	0.00049384	0.021665569	cv Sevin Septoria tritici 13 days
TraesCS4D02G223400.1	284.5430972	-3.248746128	0.798809596	-4.066984354	4.76254E-05	0.004594559	cv Sevin Septoria tritici 13 days
TraesCS4D02G231800.3	52.0731936	-8.406294605	2.146612927	-3.916073782	9.00027E-05	0.049401061	cv Sevin Septoria tritici 10 days
TraesCS4D02G236000.1	34.90565652	-5.861525549	1.576403477	-3.718290168	0.000200576	0.012090406	cv Sevin Septoria tritici 13 days
TraesCS4D02G242000.1	23.08039048	-7.463524897	2.35802379	-3.165160983	0.001549972	0.046185623	cv Sevin Septoria tritici 13 days
TraesCS4D02G242400.1	526.9328997	-3.867124853	1.046445129	-3.69548746	0.000219465	0.012847667	cv Sevin Septoria tritici 13 days
TraesCS4D02G263300.1	1789.320012	-2.393946809	0.744292557	-3.21640568	0.001298072	0.040976992	cv Sevin Septoria tritici 13 days
TraesCS4D02G280100.1	86.15840957	-9.022905697	2.213956743	-4.07546612	4.59223E-05	0.004468245	cv Sevin Septoria tritici 13 days
TraesCS4D02G297800.3	96.20961519	-9.25313296	2.844750219	-3.252704894	0.001143121	0.03763477	cv Sevin Septoria tritici 13 days
TraesCS4D02G304000.1	130.6229403	-3.614171977	0.892741713	-4.048395999	5.15698E-05	0.004860703	cv Sevin Septoria tritici 13 days
TraesCS4D02G309300.1	202.1234782	-1.824878846	0.514227888	-3.548774561	0.000387028	0.018525438	cv Sevin Septoria tritici 13 days
TraesCS4D02G335400.2	40.03172878	-8.049723511	2.125041469	-3.788031258	0.000151846	0.010169542	cv Sevin Septoria tritici 13 days
TraesCS4D02G342400.1	634.8446959	-3.67632496	1.17289121	-3.134412577	0.001721986	0.049215831	cv Sevin Septoria tritici 13 days
TraesCS4D02G343000.1	182.1327314	-2.642487364	0.598969213	-4.411724853	1.0255E-05	0.014774887	cv Sevin Septoria tritici 10 days
TraesCS4D02G343000.1	182.1327314	-4.066753536	0.666034742	-6.105918029	1.02211E-09	9.20325E-07	cv Sevin Septoria tritici 13 days
TraesCS4D02G349000.1	87.50133409	-5.1336239	1.434652663	-3.578304374	0.000345831	0.017193326	cv Sevin Septoria tritici 13 days
TraesCS4D02G357100.1	143.2580495	-10.03632282	2.51820747	-3.985502761	6.73374E-05	0.005787547	cv Sevin Septoria tritici 13 days
TraesCS4D02G359000.2	265.0432486	-2.95425253	0.929042259	-3.179890367	0.001473308	0.044778604	cv Sevin Septoria tritici 13 days
TraesCS5A02G006100.1	528.6283739	-3.027941843	0.89581318	-3.380104147	0.000724584	0.02810216	cv Sevin Septoria tritici 13 days
TraesCS5A02G018000.1	106.3591247	-2.566242703	0.664008252	-3.86477532	0.000111192	0.008180868	cv Sevin Septoria tritici 13 days
TraesCS5A02G036200.1	4184.861724	-1.280487437	0.378250407	-3.385290312	0.00071103	0.027792339	cv Sevin Septoria tritici 13 days
TraesCS5A02G045700.1	132.3472246	-3.469245288	1.071816612	-3.236789997	0.001208823	0.03904995	cv Sevin Septoria tritici 13 days
TraesCS5A02G058600.1	163.8679175	-2.784639621	0.608534418	-4.575977195	4.74002E-06	0.000810901	cv Sevin Septoria tritici 13 days
TraesCS5A02G063200.1	17.12916878	-19.6185288	5.486774098	-3.575603523	0.000349421	0.017265896	cv Sevin Septoria tritici 13 days
TraesCS5A02G087200.1	552.4067782	-4.050693593	1.016530212	-3.984823613	6.75303E-05	0.005789084	cv Sevin Septoria tritici 13 days
TraesCS5A02G096500.1	134.1266973	-9.894677182	2.089242427	-4.73601199	2.17965E-06	0.000435361	cv Sevin Septoria tritici 13 days
TraesCS5A02G103100.1	32.42985645	-5.298462694	1.603145536	-3.305041604	0.000949623	0.033334354	cv Sevin Septoria tritici 13 days
TraesCS5A02G105100.1	267.1419677	-3.981006701	1.067011372	-3.73098807	0.00019073	0.011734669	cv Sevin Septoria tritici 13 days
TraesCS5A02G131400.1	274.63991	-1.612535622	0.443438498	-3.636435785	0.000276437	0.015004494	cv Sevin Septoria tritici 13 days
TraesCS5A02G146000.1	283.6267958	-1.762651277	0.404454741	-4.358092754	1.31201E-05	0.001783748	cv Sevin Septoria tritici 13 days
TraesCS5A02G147600.1	22.81230792	-7.486272965	2.294264687	-3.263038048	0.001102247	0.036564956	cv Sevin Septoria tritici 13 days
TraesCS5A02G156400.2	54.27414643	-2.745611448	0.675971545	-4.061726364	4.87112E-05	0.033162125	cv Sevin Septoria tritici 10 days
TraesCS5A02G165700.1	16225.3417	-2.513925225	0.641681175	-3.917716964	8.93916E-05	0.007070157	cv Sevin Septoria tritici 13 days
TraesCS5A02G168400.5	58.97430216	-19.4870415	5.495831321	-3.545785954	0.000391444	0.018612786	cv Sevin Septoria tritici 13 days
TraesCS5A02G173700.1	414.0420402	-2.160411386	0.443099619	-4.875678728	1.08435E-06	0.000242169	cv Sevin Septoria tritici 13 days
TraesCS5A02G173800.1	688.0605309	-4.749206493	1.054978658	-4.501708595	6.74094E-06	0.001072087	cv Sevin Septoria tritici 13 days
TraesCS5A02G175200.1	192.5237556	-10.17024007	2.555403423	-3.979896081	6.89454E-05	0.005864898	cv Sevin Septoria tritici 13 days
TraesCS5A02G175300.2	17.37899449	-21.07634282	4.207808781	-5.008864213	5.47522E-07	0.000545887	cv Sevin Septoria tritici 4 days
TraesCS5A02G175300.2	17.37899449	-20.2901593	5.494785919	-3.692620531	0.000221955	0.012944432	cv Sevin Septoria tritici 13 days
TraesCS5A02G175600.1	9.433619183	-20.95638766	4.209288983	-4.978605115	6.40442E-07	0.000604014	cv Sevin Septoria tritici 4 days
TraesCS5A02G175600.1	9.433619183	-19.57739	5.495919457	-3.562168288	0.000367804	0.017924465	cv Sevin Septoria tritici 13 days
TraesCS5A02G177400.1	750.3588527	-3.747154758	0.870883973	-4.302702627	1.68727E-05	0.002165435	cv Sevin Septoria tritici 13 days
TraesCS5A02G208900.2	44.48310483	-8.397491706	1.813413742	-4.630764347	3.64318E-06	0.00189831	cv Sevin Septoria tritici 4 days
TraesCS5A02G213000.1	408.6382416	-1.733593522	0.455684177	-3.804375069	0.000142163	0.009681054	cv Sevin Septoria tritici 13 days
TraesCS5A02G225100.3	53.51125552	-8.323571229	2.184138099	-3.810918015	0.000138452	0.009542904	cv Sevin Septoria tritici 13 days
TraesCS5A02G229300.1	6165.755904	-2.9392624	0.551587794	-5.328729956	9.89019E-08	3.28088E-05	cv Sevin Septoria tritici 13 days
TraesCS5A02G276700.3	15.48870381	-19.50166075	4.563289841	-4.273596777	1.92345E-05	0.02019685	cv Sevin Septoria tritici 10 days
TraesCS5A02G276700.3	15.48870381	-19.41092636	4.563289841	-4.253713229	2.10255E-05	0.002541421	cv Sevin Septoria tritici 13 days
TraesCS5A02G316600.1	22.40497827	-4.195760889	1.246802718	-3.365216349	0.000764837	0.028977803	cv Sevin Septoria tritici 13 days
TraesCS5A02G322500.1	9802.272772	-3.020646794	0.922587524	-3.274103231	0.001059979	0.035833446	cv Sevin Septoria tritici 13 days
TraesCS5A02G326300.5	44.16181089	-8.490164609	2.306310139	-3.681276193	0.000232069	0.013378426	cv Sevin Septoria tritici 13 days
TraesCS5A02G348100.1	51.76649737	-4.660004395	1.242513367	-3.750466208	0.000176506	0.011124983	cv Sevin Septoria tritici 13 days
TraesCS5A02G362100.2	58.30479382	-9.045565719	2.171208898	-4.166142524	3.09797E-05	0.003399139	cv Sevin Septoria tritici 13 days
TraesCS5A02G366800.1	102.0497255	-2.609348899	0.805374431	-3.239920215	0.001195631	0.038756224	cv Sevin Septoria tritici 13 days
TraesCS5A02G367700.1	37.22988808	-7.660979723	2.188938847	-3.499860096	0.000465502	0.020940594	cv Sevin Septoria tritici 13 days
TraesCS5A02G376500.1	258.2026938	-1.747818519	0.545175028	-3.205976852	0.001346048	0.041898436	cv Sevin Septoria tritici 13 days
TraesCS5A02G400400.2	47.97074426	-8.302157285	2.137343796	-3.884334052	0.000102611	0.007689164	cv Sevin Septoria tritici 13 days
TraesCS5A02G402300.1	87.45884012	-3.523990696	0.69000357	-5.10720647	3.26956E-07	8.71894E-05	cv Sevin Septoria tritici 13 days
TraesCS5A02G404500.1	299.7370811	-3.677004602	1.161096232	-3.166838804	0.001541057	0.046009478	cv Sevin Septoria tritici 13 days
TraesCS5A02G404800.1	99.01477547	-4.524936674	1.294472772	-3.495582736	0.000473028	0.021028976	cv Sevin Septoria tritici 13 days
TraesCS5A02G417000.1	99.21566829	-2.891062447	0.761665928	-3.795709299	0.000147222	0.009918422	cv Sevin Septoria tritici 13 days
TraesCS5A02G423100.1	81.08805114	-9.152295706	2.099994547	-4.358247367	1.31108E-05	0.016508538	cv Sevin Septoria tritici 10 days
TraesCS5A02G423600.1	52.73244449	-3.420741185	0.877393937	-3.898751793	9.66898E-05	0.007472516	cv Sevin Septoria tritici 13 days
TraesCS5A02G431200.1	101.6682977	-4.988078649	1.053215849	-4.736045943	2.17928E-06	0.000435361	cv Sevin Septoria tritici 13 days
TraesCS5A02G431200.2	103.0048734	-9.471300949	2.161022161	-4.382787516	1.1717E-05	0.016130976	cv Sevin Septoria tritici 10 days
TraesCS5A02G445100.1	285.4607516	-3.860211344	1.192424884	-3.237278421	0.001206756	0.039005384	cv Sevin Septoria tritici 13 days
TraesCS5A02G454200.1	367.2908446	-9.037672276	1.895875095	-4.767018829	1.86972E-06	0.000385679	cv Sevin Septoria tritici 13 days
TraesCS5A02G454300.1	310.2627795	-4.907856151	0.979407192	-5.011047696	5.41345E-07	0.000130715	cv Sevin Septoria tritici 13 days
TraesCS5A02G454900.1	498.1793219	-3.503855098	0.994084383	-3.524705909	0.000423953	0.019568078	cv Sevin Septoria tritici 13 days
TraesCS5A02G455800.2	30.86740227	-8.342002761	1.555141802	-5.364142838	8.13345E-08	0.000109162	cv Sevin Septoria tritici 4 days
TraesCS5A02G455800.2	30.86740227	-8.609265355	2.172322156	-3.963162338	7.39634E-05	0.043286492	cv Sevin Septoria tritici 10 days
TraesCS5A02G455800.2	30.86740227	-8.509970793	2.172322156	-3.917453389	8.94893E-05	0.007070157	cv Sevin Septoria tritici 13 days
TraesCS5A02G466800.1	502.8366563	-1.616175405	0.503757995	-3.208237729	0.001335511	0.041730297	cv Sevin Septoria tritici 13 days
TraesCS5A02G468600.1	834.0649168	-3.33841624	0.90646657	-3.68288953	0.000230605	0.013334664	cv Sevin Septoria tritici 13 days
TraesCS5A02G472700.2	9.663707456	-17.89336732	5.495861119	-3.255789572	0.001130775	0.03729323	cv Sevin Septoria tritici 13 days
TraesCS5A02G482800.1	3522.704005	-2.060337001	0.575616213	-3.579358876	0.000344438	0.017154171	cv Sevin Septoria tritici 13 days
TraesCS5A02G492900.1	177.3891476	-5.083920195	1.405607286	-3.616885203	0.000298169	0.015668262	cv Sevin Septoria tritici 13 days
TraesCS5A02G497000.2	9.893795729	-20.39289531	4.209138205	-4.844909888	1.26669E-06	0.000892966	cv Sevin Septoria tritici 4 days
TraesCS5A02G497000.2	9.893795729	-19.87388921	5.495803984	-3.61619324	0.000298967	0.015668262	cv Sevin Septoria tritici 13 days
TraesCS5A02G497600.2	12.21692522	-6.669314732	1.667061238	-4.000641717	6.31709E-05	0.024629962	cv Sevin Septoria tritici 4 days
TraesCS5A02G515700.1	465.21006	-3.799985513	1.09696313	-3.46409593	0.000532017	0.022793111	cv Sevin Septoria tritici 13 days
TraesCS5A02G530000.3	41.42818863	-3.371147288	0.974033295	-3.461018537	0.000538136	0.022917634	cv Sevin Septoria tritici 13 days
TraesCS5A02G532500.2	60.42410569	-8.538603746	2.634141451	-3.241512995	0.00118897	0.038650728	cv Sevin Septoria tritici 13 days
TraesCS5A02G533500.1	29.00123803	-7.469238734	2.310817936	-3.232292175	0.001228014	0.039422941	cv Sevin Septoria tritici 13 days
TraesCS5A02G536100.1	30.78714656	-2.891632358	0.925370279	-3.124838156	0.001779029	0.049983757	cv Sevin Septoria tritici 13 days
TraesCS5A02G546500.1	1541.991048	-1.464543633	0.428544661	-3.417481922	0.000632033	0.025554312	cv Sevin Septoria tritici 13 days
TraesCS5B02G005000.1	436.2672939	-2.588842164	0.823312275	-3.144423136	0.001664146	0.048089841	cv Sevin Septoria tritici 13 days
TraesCS5B02G010600.1	45.10317323	-3.655129052	0.856743037	-4.266307274	1.98735E-05	0.00246145	cv Sevin Septoria tritici 13 days
TraesCS5B02G014700.1	41.88369953	-4.850919523	1.319367577	-3.676700571	0.00023627	0.013551727	cv Sevin Septoria tritici 13 days
TraesCS5B02G016100.1	50.61942295	-2.636722908	0.768589962	-3.430597639	0.000602253	0.024666725	cv Sevin Septoria tritici 13 days
TraesCS5B02G018700.3	92.71061586	-9.736126312	2.771600749	-3.512817031	0.000443383	0.020250666	cv Sevin Septoria tritici 13 days
TraesCS5B02G036600.1	98.31065812	-4.507125783	0.966686948	-4.662446091	3.12473E-06	0.000584995	cv Sevin Septoria tritici 13 days
TraesCS5B02G058400.1	55.742664	-8.397822142	2.106385934	-3.986839262	6.69594E-05	0.005774877	cv Sevin Septoria tritici 13 days
TraesCS5B02G075300.1	86.45881843	-3.678650657	1.154839415	-3.185421808	0.001445432	0.044225217	cv Sevin Septoria tritici 13 days
TraesCS5B02G093100.1	340.2648958	-3.255779487	0.940186859	-3.462906819	0.000534373	0.022825954	cv Sevin Septoria tritici 13 days
TraesCS5B02G099300.2	1771.182039	-3.167140705	1.011194985	-3.13207715	0.001735743	0.049428581	cv Sevin Septoria tritici 13 days
TraesCS5B02G102000.1	1087.061268	-3.24708847	1.028311274	-3.157690235	0.001590244	0.046934549	cv Sevin Septoria tritici 13 days
TraesCS5B02G105200.1	24.59716673	-20.35982705	4.209033816	-4.83717355	1.31698E-06	0.000901114	cv Sevin Septoria tritici 4 days
TraesCS5B02G118700.2	26.120786	-5.107274152	1.242993697	-4.108849596	3.97635E-05	0.016518654	cv Sevin Septoria tritici 4 days
TraesCS5B02G118700.2	26.120786	-7.717460681	2.234524482	-3.453737358	0.000552876	0.023317783	cv Sevin Septoria tritici 13 days
TraesCS5B02G133400.1	326.5407112	-1.310942922	0.366514709	-3.576781202	0.000347851	0.017234376	cv Sevin Septoria tritici 13 days
TraesCS5B02G133900.3	30.80913786	-20.3006032	4.209067656	-4.823064122	1.41369E-06	0.000930785	cv Sevin Septoria tritici 4 days
TraesCS5B02G144900.1	46.44851966	-2.509731136	0.710248108	-3.53359778	0.000409944	0.01909237	cv Sevin Septoria tritici 13 days
TraesCS5B02G146700.1	90.39797709	-1.966309507	0.527184321	-3.729833055	0.000191607	0.011750357	cv Sevin Septoria tritici 13 days
TraesCS5B02G155200.2	25.7949185	-19.65230412	5.495008539	-3.576391916	0.000348369	0.017234376	cv Sevin Septoria tritici 13 days
TraesCS5B02G162600.1	15899.8414	-1.987288811	0.542193625	-3.665275131	0.000247073	0.013877448	cv Sevin Septoria tritici 13 days
TraesCS5B02G165100.3	62.11298314	-8.688232071	2.132804353	-4.073618876	4.62882E-05	0.03296146	cv Sevin Septoria tritici 10 days
TraesCS5B02G171100.1	441.3887071	-1.791423585	0.492289757	-3.63896173	0.000273739	0.014929006	cv Sevin Septoria tritici 13 days
TraesCS5B02G171200.1	596.6221164	-3.872672314	1.100528885	-3.518919282	0.000433309	0.019920199	cv Sevin Septoria tritici 13 days
TraesCS5B02G172900.2	148.5677209	-5.366344564	1.575052476	-3.40708938	0.000656596	0.02619274	cv Sevin Septoria tritici 13 days
TraesCS5B02G183500.1	114.8073875	-9.677595375	2.119375981	-4.566247546	4.96532E-06	0.010420069	cv Sevin Septoria tritici 10 days
TraesCS5B02G213400.1	70.62798792	-9.127921862	2.140668868	-4.264051296	2.00753E-05	0.002481031	cv Sevin Septoria tritici 13 days
TraesCS5B02G227900.1	4732.293294	-3.069637568	0.504727278	-6.081774662	1.1886E-09	9.6232E-07	cv Sevin Septoria tritici 13 days
TraesCS5B02G239700.1	67.93752686	-2.100800078	0.638131345	-3.292112346	0.000994379	0.034394593	cv Sevin Septoria tritici 13 days
TraesCS5B02G263800.1	97.52976655	-2.167061871	0.569290635	-3.806600249	0.00014089	0.009629081	cv Sevin Septoria tritici 13 days
TraesCS5B02G268100.1	31.32642458	-8.262181443	2.459071757	-3.359878141	0.000779769	0.029274092	cv Sevin Septoria tritici 13 days
TraesCS5B02G270000.1	34.43001556	-20.55451912	4.208616098	-4.883914009	1.04E-06	0.000824806	cv Sevin Septoria tritici 4 days
TraesCS5B02G270200.1	348.0646832	-4.183390927	0.797164514	-5.247838879	1.53894E-07	4.69343E-05	cv Sevin Septoria tritici 13 days
TraesCS5B02G298900.2	40.27047756	-8.197329245	2.324542691	-3.526426628	0.000421208	0.019488937	cv Sevin Septoria tritici 13 days
TraesCS5B02G304800.1	60.04337114	-8.938691127	2.153455186	-4.150860061	3.31228E-05	0.003565323	cv Sevin Septoria tritici 13 days
TraesCS5B02G314400.1	33.55815221	-2.714452713	0.800762517	-3.389834884	0.000699347	0.027435115	cv Sevin Septoria tritici 13 days
TraesCS5B02G349200.1	41.28481805	-5.778190784	1.808339097	-3.195302692	0.001396843	0.043087162	cv Sevin Septoria tritici 13 days
TraesCS5B02G356300.2	85.28102326	-19.79256033	5.49537571	-3.60167555	0.000316173	0.016191752	cv Sevin Septoria tritici 13 days
TraesCS5B02G364900.4	87.25008302	-9.133709069	2.113347201	-4.321915995	1.5468E-05	0.002040554	cv Sevin Septoria tritici 13 days
TraesCS5B02G371800.2	9.001109667	-20.18875165	4.209445456	-4.796059686	1.61817E-06	0.0009803	cv Sevin Septoria tritici 4 days
TraesCS5B02G407400.1	284.4804273	-2.387780485	0.719985505	-3.316428552	0.000911759	0.03240629	cv Sevin Septoria tritici 13 days
TraesCS5B02G409400.1	431.5332896	-4.611363985	1.123564296	-4.104227948	4.05667E-05	0.004087369	cv Sevin Septoria tritici 13 days
TraesCS5B02G419300.1	119.9416973	-2.660923971	0.740315279	-3.594311836	0.00032525	0.016400122	cv Sevin Septoria tritici 13 days
TraesCS5B02G463100.1	97.54691156	-9.756610013	2.438667014	-4.000796319	6.31297E-05	0.005543489	cv Sevin Septoria tritici 13 days
TraesCS5B02G471700.1	393.0349721	-1.864191039	0.476297708	-3.913919822	9.08098E-05	0.007115023	cv Sevin Septoria tritici 13 days
TraesCS5B02G478600.1	387.3071148	-2.664939303	0.651292792	-4.091768456	4.28096E-05	0.004223983	cv Sevin Septoria tritici 13 days
TraesCS5B02G481100.1	892.3766345	-3.512660658	1.000758573	-3.50999807	0.00044811	0.020417257	cv Sevin Septoria tritici 13 days
TraesCS5B02G496000.1	2737.790782	-1.973760321	0.417703263	-4.725269101	2.29811E-06	0.000455813	cv Sevin Septoria tritici 13 days
TraesCS5B02G502700.1	42.43280176	-2.924317959	0.79704774	-3.668937018	0.000243561	0.01377492	cv Sevin Septoria tritici 13 days
TraesCS5B02G503800.1	626.9274703	-4.381011182	1.128847461	-3.880959416	0.000104045	0.007765879	cv Sevin Septoria tritici 13 days
TraesCS5B02G515100.1	295.3811847	-1.637202577	0.488447941	-3.351846614	0.000802745	0.029781885	cv Sevin Septoria tritici 13 days
TraesCS5B02G531400.1	18.09303833	-6.670191304	1.699640742	-3.924471296	8.69204E-05	0.032096631	cv Sevin Septoria tritici 4 days
TraesCS5B02G531900.2	514.0949298	-3.318457359	0.971595448	-3.415472322	0.000636715	0.02567043	cv Sevin Septoria tritici 13 days
TraesCS5B02G532400.1	1201.88681	-2.372628941	0.639396294	-3.71073302	0.00020666	0.012301147	cv Sevin Septoria tritici 13 days
TraesCS5B02G559000.1	75.19853109	-3.71970333	0.835612483	-4.451469317	8.52847E-06	0.001273121	cv Sevin Septoria tritici 13 days
TraesCS5B02G568500.2	39.57319767	-8.66542354	2.476348607	-3.499274503	0.000466526	0.020946539	cv Sevin Septoria tritici 13 days
TraesCS5B02G571100.1	55.00992812	-4.178477249	1.062791617	-3.93160539	8.43805E-05	0.006811698	cv Sevin Septoria tritici 13 days
TraesCS5D02G006100.1	482.2104411	-3.414015827	0.958630153	-3.561348259	0.000368955	0.01796232	cv Sevin Septoria tritici 13 days
TraesCS5D02G017700.1	75.41561237	-3.490655712	0.733805795	-4.756920339	1.96569E-06	0.000404006	cv Sevin Septoria tritici 13 days
TraesCS5D02G023100.6	18.73835249	-7.306221938	1.729400748	-4.224713067	2.39245E-05	0.010435735	cv Sevin Septoria tritici 4 days
TraesCS5D02G044100.2	55.4255978	-19.93749415	5.495196559	-3.628167607	0.00028544	0.015275345	cv Sevin Septoria tritici 13 days
TraesCS5D02G044400.1	3580.562164	-1.28853215	0.393955234	-3.27075779	0.001072597	0.036002459	cv Sevin Septoria tritici 13 days
TraesCS5D02G054800.1	17.37202253	-5.012941605	1.236708641	-4.053454014	5.04669E-05	0.020126498	cv Sevin Septoria tritici 4 days
TraesCS5D02G054800.1	17.37202253	-7.623594189	2.228685174	-3.420668957	0.000624673	0.025328958	cv Sevin Septoria tritici 13 days
TraesCS5D02G055700.1	262.8167278	-3.451811042	1.052627602	-3.279232879	0.001040897	0.03535684	cv Sevin Septoria tritici 13 days
TraesCS5D02G057800.2	49.82879104	-20.35500416	5.494730625	-3.704458971	0.000211842	0.012536936	cv Sevin Septoria tritici 13 days
TraesCS5D02G073700.1	118.6890572	-2.109046265	0.554695443	-3.802169808	0.000143434	0.009732605	cv Sevin Septoria tritici 13 days
TraesCS5D02G099000.1	321.4630701	-4.073637029	1.150652924	-3.540283037	0.000399698	0.018769268	cv Sevin Septoria tritici 13 days
TraesCS5D02G099200.2	25.79197867	-8.008354452	2.238353173	-3.577788595	0.000346514	0.017212195	cv Sevin Septoria tritici 13 days
TraesCS5D02G105000.1	31.44719288	-7.636123992	2.224512345	-3.432718191	0.000597563	0.024538205	cv Sevin Septoria tritici 13 days
TraesCS5D02G108700.1	1121.642306	-3.337481413	0.992888958	-3.361384357	0.000775528	0.029172822	cv Sevin Septoria tritici 13 days
TraesCS5D02G115900.1	229.323401	-3.571750565	1.015018686	-3.518901292	0.000433338	0.019920199	cv Sevin Septoria tritici 13 days
TraesCS5D02G118900.1	176.721653	-1.648596461	0.521736398	-3.15982643	0.001578632	0.04673771	cv Sevin Septoria tritici 13 days
TraesCS5D02G123300.12	47.70314612	-4.883356169	1.326829073	-3.680471185	0.000232803	0.013393513	cv Sevin Septoria tritici 13 days
TraesCS5D02G126600.1	250.6581521	-1.536833363	0.413849744	-3.713505649	0.000204408	0.012191978	cv Sevin Septoria tritici 13 days
TraesCS5D02G142900.1	9.547288077	-19.22610287	5.496068574	-3.498155566	0.000468488	0.020946539	cv Sevin Septoria tritici 13 days
TraesCS5D02G144600.1	128.5498355	-2.722808263	0.506241212	-5.378480056	7.51173E-08	2.59823E-05	cv Sevin Septoria tritici 13 days
TraesCS5D02G146200.1	43.34709797	-3.168264491	1.007920766	-3.143366618	0.001670165	0.048182954	cv Sevin Septoria tritici 13 days
TraesCS5D02G160400.1	163.403361	-2.258186953	0.586053272	-3.853211065	0.000116579	0.008435012	cv Sevin Septoria tritici 13 days
TraesCS5D02G166000.1	45.57599465	-8.291086488	2.565258026	-3.232067264	0.001228981	0.03942631	cv Sevin Septoria tritici 13 days
TraesCS5D02G166000.3	45.10879959	-8.079585513	2.12447034	-3.803105819	0.000142893	0.048885613	cv Sevin Septoria tritici 4 days
TraesCS5D02G169600.2	17951.76707	-2.703953696	0.554753917	-4.8741498	1.09278E-06	0.000243094	cv Sevin Septoria tritici 13 days
TraesCS5D02G169900.2	33655.87166	-2.67401911	0.768914223	-3.477655935	0.000505819	0.021991266	cv Sevin Septoria tritici 13 days
TraesCS5D02G178300.1	824.7598399	-4.935512234	1.24519066	-3.963659859	7.38094E-05	0.006157223	cv Sevin Septoria tritici 13 days
TraesCS5D02G179600.2	8.858398502	-20.16808183	4.209499095	-4.791088291	1.65879E-06	0.0009803	cv Sevin Septoria tritici 4 days
TraesCS5D02G179900.1	181.7628213	-6.074365205	1.825879383	-3.326816251	0.000878443	0.031618366	cv Sevin Septoria tritici 13 days
TraesCS5D02G179900.2	301.862565	-4.532939696	1.326579449	-3.417013357	0.000633122	0.025561896	cv Sevin Septoria tritici 13 days
TraesCS5D02G202700.1	53.27525521	-3.537382219	0.946769244	-3.736266512	0.000186773	0.011566451	cv Sevin Septoria tritici 13 days
TraesCS5D02G205500.1	120.7800396	-9.82755262	2.964220703	-3.315391668	0.000915148	0.032467479	cv Sevin Septoria tritici 13 days
TraesCS5D02G218600.2	20.53370612	-7.266516054	2.170887497	-3.347255933	0.000816158	0.03012192	cv Sevin Septoria tritici 13 days
TraesCS5D02G219100.1	332.1912563	-3.710072984	0.617500067	-6.008214706	1.87577E-09	1.40007E-06	cv Sevin Septoria tritici 13 days
TraesCS5D02G222900.3	29.97178944	-7.605343413	2.235595243	-3.401932186	0.000669112	0.026596215	cv Sevin Septoria tritici 13 days
TraesCS5D02G238300.1	6521.380933	-3.12765347	0.565433307	-5.531427727	3.17635E-08	1.30566E-05	cv Sevin Septoria tritici 13 days
TraesCS5D02G241000.1	33.4943447	-2.717898206	0.866831853	-3.135438778	0.001715972	0.049163424	cv Sevin Septoria tritici 13 days
TraesCS5D02G246000.1	17.78088336	-7.495765222	2.265251467	-3.309021241	0.000936227	0.032904853	cv Sevin Septoria tritici 13 days
TraesCS5D02G266400.1	125.2445245	-2.958114918	0.879616292	-3.362960582	0.000771114	0.029083908	cv Sevin Septoria tritici 13 days
TraesCS5D02G276200.1	46.5535304	-3.106128449	0.95945219	-3.237397843	0.001206251	0.039005384	cv Sevin Septoria tritici 13 days
TraesCS5D02G277900.1	481.7211376	-3.413255474	0.681618274	-5.007576241	5.51197E-07	0.000132488	cv Sevin Septoria tritici 13 days
TraesCS5D02G284200.2	19.26470031	-7.105753476	1.770753001	-4.012842825	5.99919E-05	0.023789159	cv Sevin Septoria tritici 4 days
TraesCS5D02G294800.1	71.57411462	-2.454152276	0.68065783	-3.605559456	0.000311481	0.016033648	cv Sevin Septoria tritici 13 days
TraesCS5D02G306300.4	11.29457572	-19.17526444	5.496542247	-3.488604941	0.000485548	0.021417734	cv Sevin Septoria tritici 13 days
TraesCS5D02G311200.1	151.9892717	-7.803794442	1.533113908	-5.090159577	3.57762E-07	9.48338E-05	cv Sevin Septoria tritici 13 days
TraesCS5D02G322900.1	35.36957828	-3.923312838	1.042053746	-3.764981272	0.000166562	0.010764926	cv Sevin Septoria tritici 13 days
TraesCS5D02G334700.1	61.54456039	-8.121945836	2.468169347	-3.290676082	0.000999469	0.03450627	cv Sevin Septoria tritici 13 days
TraesCS5D02G354300.1	25.50665508	-7.728293461	2.283126084	-3.384961311	0.000711883	0.027792339	cv Sevin Septoria tritici 13 days
TraesCS5D02G381000.2	105.234589	-4.560751489	0.873821613	-5.219316416	1.79585E-07	5.2783E-05	cv Sevin Septoria tritici 13 days
TraesCS5D02G387400.1	176.7481141	-4.429119519	1.295922537	-3.417734775	0.000631446	0.025548795	cv Sevin Septoria tritici 13 days
TraesCS5D02G401200.1	74.08801923	-2.850180848	0.839068221	-3.396840418	0.000681687	0.026853737	cv Sevin Septoria tritici 13 days
TraesCS5D02G405900.1	68.19354729	-8.872663485	2.129086625	-4.167356735	3.08152E-05	0.003387642	cv Sevin Septoria tritici 13 days
TraesCS5D02G412400.1	86.48302928	-3.575548022	0.710574146	-5.03191404	4.85607E-07	0.000120818	cv Sevin Septoria tritici 13 days
TraesCS5D02G414900.1	122.6328408	-3.787779499	0.929659081	-4.074374766	4.61381E-05	0.004481561	cv Sevin Septoria tritici 13 days
TraesCS5D02G417900.1	33.05792071	-3.535054564	1.013632262	-3.487511887	0.000487537	0.021472079	cv Sevin Septoria tritici 13 days
TraesCS5D02G424700.1	156.3788994	-3.28722668	0.664082487	-4.950027659	7.42029E-07	0.000171806	cv Sevin Septoria tritici 13 days
TraesCS5D02G444500.2	42.39665308	-8.395830938	2.106411528	-3.985845512	6.72403E-05	0.005787547	cv Sevin Septoria tritici 13 days
TraesCS5D02G464700.1	192.1979471	-7.257802389	1.365934146	-5.313435065	1.07578E-07	3.48712E-05	cv Sevin Septoria tritici 13 days
TraesCS5D02G464800.1	53.70931217	-6.234443839	1.769491375	-3.523297106	0.000426213	0.019640435	cv Sevin Septoria tritici 13 days
TraesCS5D02G465300.1	318.8293302	-4.179321248	0.708617662	-5.897850804	3.68267E-09	2.45768E-06	cv Sevin Septoria tritici 13 days
TraesCS5D02G479700.1	313.8261144	-2.794635692	0.828357193	-3.373708485	0.000741629	0.02836792	cv Sevin Septoria tritici 13 days
TraesCS5D02G481500.1	1203.89185	-3.253917715	0.899463022	-3.617622556	0.000297322	0.015645513	cv Sevin Septoria tritici 13 days
TraesCS5D02G486300.2	60.48571097	-6.169904077	1.553668722	-3.971183812	7.15164E-05	0.027339869	cv Sevin Septoria tritici 4 days
TraesCS5D02G496400.2	3706.06803	-1.917001452	0.496695265	-3.859512236	0.000113614	0.008311065	cv Sevin Septoria tritici 13 days
TraesCS5D02G504600.1	440.1700105	-4.813479686	1.066240001	-4.51444298	6.34834E-06	0.001028903	cv Sevin Septoria tritici 13 days
TraesCS5D02G506800.3	28.02239576	-7.665391692	2.206285588	-3.474342458	0.000512107	0.022124738	cv Sevin Septoria tritici 13 days
TraesCS5D02G506800.4	27.80452572	-7.674821701	2.231092071	-3.439939481	0.000581844	0.024144622	cv Sevin Septoria tritici 13 days
TraesCS5D02G508500.3	84.03039375	-3.723435287	0.710534845	-5.240327496	1.60292E-07	0.0012413	cv Sevin Septoria tritici 10 days
TraesCS5D02G530200.1	640.1534057	-3.160580365	0.998871653	-3.164150626	0.001555363	0.046241881	cv Sevin Septoria tritici 13 days
TraesCS5D02G533700.1	39.55009902	-7.516833207	1.756803765	-4.278698257	1.8799E-05	0.008519465	cv Sevin Septoria tritici 4 days
TraesCS5D02G534600.3	108.3957396	-5.789517522	1.519840286	-3.809293368	0.000139365	0.009570934	cv Sevin Septoria tritici 13 days
TraesCS5D02G562100.1	16.78602328	-19.54308819	4.447045723	-4.394622725	1.10965E-05	0.015623914	cv Sevin Septoria tritici 10 days
TraesCS5D02G562100.1	16.78602328	-19.38055275	4.447045723	-4.358073642	1.31212E-05	0.001783748	cv Sevin Septoria tritici 13 days
TraesCS5D02G565000.1	107.5401188	-5.045541201	0.82729606	-6.098833835	1.06845E-09	9.32445E-07	cv Sevin Septoria tritici 13 days
TraesCS6A02G000400.1	3391.998611	-1.001798471	0.303815117	-3.297395075	0.000975861	0.03396117	cv Sevin Septoria tritici 13 days
TraesCS6A02G018000.1	1377.951158	-3.08631964	0.656261437	-4.702881302	2.56516E-06	0.000498325	cv Sevin Septoria tritici 13 days
TraesCS6A02G048600.1	336.7492088	-2.456224758	0.543912865	-4.515842362	6.30656E-06	0.001025059	cv Sevin Septoria tritici 13 days
TraesCS6A02G066900.1	7.707957138	-20.09051721	4.210013681	-4.772078841	1.82334E-06	0.001032604	cv Sevin Septoria tritici 4 days
TraesCS6A02G068300.1	117.2918716	-3.075473331	0.718582654	-4.279915907	1.86964E-05	0.002341218	cv Sevin Septoria tritici 13 days
TraesCS6A02G078800.2	23.8107634	-7.7744883	1.610710888	-4.826743494	1.38784E-06	0.000922462	cv Sevin Septoria tritici 4 days
TraesCS6A02G086300.1	1012.124802	-2.592975932	0.646062246	-4.013507905	5.9823E-05	0.005369493	cv Sevin Septoria tritici 13 days
TraesCS6A02G094200.1	958.8091756	-4.579054484	1.087155087	-4.211960685	2.53164E-05	0.0228567	cv Sevin Septoria tritici 10 days
TraesCS6A02G094200.1	958.8091756	-7.003318112	1.15116779	-6.08366406	1.17467E-09	9.6232E-07	cv Sevin Septoria tritici 13 days
TraesCS6A02G094400.1	160.4711539	-6.914580597	1.711184735	-4.040814797	5.32658E-05	0.004977299	cv Sevin Septoria tritici 13 days
TraesCS6A02G095100.1	98.95769452	-2.504228592	0.612820201	-4.0864002	4.38118E-05	0.004307222	cv Sevin Septoria tritici 13 days
TraesCS6A02G105400.1	881.6213723	-2.965259809	0.914989112	-3.240759665	0.001192116	0.038693704	cv Sevin Septoria tritici 13 days
TraesCS6A02G118000.1	730.8906012	-2.759863237	0.742297055	-3.718003753	0.000200803	0.012090406	cv Sevin Septoria tritici 13 days
TraesCS6A02G123900.1	270.0151524	-3.388396503	0.941119461	-3.600389368	0.000317741	0.016208792	cv Sevin Septoria tritici 13 days
TraesCS6A02G169100.1	204.4271812	-6.27257978	1.804944569	-3.475220175	0.000510434	0.022086111	cv Sevin Septoria tritici 13 days
TraesCS6A02G176900.2	13.03605131	-23.1428769	4.069599695	-5.686769863	1.29465E-08	2.5525E-05	cv Sevin Septoria tritici 4 days
TraesCS6A02G176900.3	74.18353095	-8.904532287	2.180898656	-4.082964728	4.44648E-05	0.004348808	cv Sevin Septoria tritici 13 days
TraesCS6A02G188100.1	45.31122956	-4.486831764	1.320670706	-3.397388724	0.000680323	0.026848207	cv Sevin Septoria tritici 13 days
TraesCS6A02G190000.2	52.39830689	-8.72267737	2.173692727	-4.012838274	5.9993E-05	0.005376246	cv Sevin Septoria tritici 13 days
TraesCS6A02G192600.3	20.6166523	-25.75978953	3.809544904	-6.761907309	1.36187E-11	3.1682E-07	cv Sevin Septoria tritici 4 days
TraesCS6A02G208400.1	36.08757355	-8.277343908	2.205331039	-3.753333973	0.000174498	0.011035207	cv Sevin Septoria tritici 13 days
TraesCS6A02G210200.1	542.0077775	-3.34757838	0.944843976	-3.542995949	0.000395609	0.018704142	cv Sevin Septoria tritici 13 days
TraesCS6A02G221300.2	52.2054203	-8.638512314	2.155704424	-4.007280506	6.14219E-05	0.038436459	cv Sevin Septoria tritici 10 days
TraesCS6A02G221700.1	25.97125348	-7.378042546	1.843169707	-4.002910051	6.25681E-05	0.024629962	cv Sevin Septoria tritici 4 days
TraesCS6A02G223700.1	38.42296908	-4.601223033	1.210859641	-3.799963992	0.000144717	0.009790422	cv Sevin Septoria tritici 13 days
TraesCS6A02G230900.1	305.3291767	-2.927120327	0.920987804	-3.178240054	0.00148172	0.044947625	cv Sevin Septoria tritici 13 days
TraesCS6A02G242900.3	50.49598466	-20.35247292	5.494729174	-3.703999283	0.000212227	0.012536936	cv Sevin Septoria tritici 13 days
TraesCS6A02G275200.2	39.6062835	-19.39672722	5.496075049	-3.529196207	0.000416824	0.019333407	cv Sevin Septoria tritici 13 days
TraesCS6A02G283700.1	72.37029051	-8.954521348	2.800233785	-3.197776341	0.001384916	0.042859123	cv Sevin Septoria tritici 13 days
TraesCS6A02G288000.1	516.2608655	-1.098897556	0.345260211	-3.182809725	0.001458534	0.044506087	cv Sevin Septoria tritici 13 days
TraesCS6A02G291900.2	64.44994861	-8.925409818	1.533666846	-5.819653624	5.89697E-09	1.65492E-05	cv Sevin Septoria tritici 4 days
TraesCS6A02G292800.1	35.18539352	-4.610161936	1.38520094	-3.328153919	0.000874236	0.03148691	cv Sevin Septoria tritici 13 days
TraesCS6A02G293400.1	366.4049162	-2.743567975	0.481085668	-5.702867821	1.17808E-08	5.91398E-06	cv Sevin Septoria tritici 13 days
TraesCS6A02G302500.1	184.2370448	-2.887703253	0.669009962	-4.316383037	1.58607E-05	0.002077857	cv Sevin Septoria tritici 13 days
TraesCS6A02G308100.1	552.928092	-2.535054223	0.490038432	-5.173174307	2.3015E-07	6.49527E-05	cv Sevin Septoria tritici 13 days
TraesCS6A02G309600.2	102.5826976	-9.433126162	2.133955786	-4.420488103	9.84782E-06	0.00142507	cv Sevin Septoria tritici 13 days
TraesCS6A02G309600.4	78.22134123	-8.954909417	1.543766085	-5.800690601	6.60424E-09	1.65492E-05	cv Sevin Septoria tritici 4 days
TraesCS6A02G319100.1	434.6803033	-3.577708831	1.003482622	-3.565292265	0.000363451	0.017758069	cv Sevin Septoria tritici 13 days
TraesCS6A02G330600.3	46.95378776	-8.256606133	2.232582922	-3.698230444	0.000217108	0.012762336	cv Sevin Septoria tritici 13 days
TraesCS6A02G340300.1	329.8274404	-4.755488835	1.319985409	-3.602682881	0.00031495	0.016168176	cv Sevin Septoria tritici 13 days
TraesCS6A02G354400.1	2708.785179	-2.316045345	0.688430445	-3.364240154	0.000767547	0.029004808	cv Sevin Septoria tritici 13 days
TraesCS6A02G374400.2	196.6344478	-4.549303519	1.373627508	-3.311890226	0.000926679	0.032690792	cv Sevin Septoria tritici 13 days
TraesCS6A02G383700.1	41.67698417	-2.415454247	0.693368996	-3.483649056	0.000494628	0.021683343	cv Sevin Septoria tritici 13 days
TraesCS6A02G386500.1	143.5898244	-2.07000842	0.620784124	-3.334506056	0.00085451	0.031012768	cv Sevin Septoria tritici 13 days
TraesCS6A02G394800.2	33.64726106	-8.537480251	2.665449742	-3.203016781	0.001359961	0.042241313	cv Sevin Septoria tritici 13 days
TraesCS6A02G405100.1	36.96941761	-3.765440097	0.925193354	-4.069895315	4.70343E-05	0.033112124	cv Sevin Septoria tritici 10 days
TraesCS6A02G406500.1	218.5424073	-4.723360497	1.206182543	-3.915958264	9.00458E-05	0.007080123	cv Sevin Septoria tritici 13 days
TraesCS6A02G412900.1	595.4143898	-3.301199472	0.689884141	-4.785150544	1.70859E-06	0.000356329	cv Sevin Septoria tritici 13 days
TraesCS6A02G418800.1	92.41139685	-2.464909116	0.708887549	-3.477151095	0.000506772	0.021994764	cv Sevin Septoria tritici 13 days
TraesCS6B02G048200.1	27.07915646	-7.599155748	2.258576122	-3.364578096	0.000766608	0.028991065	cv Sevin Septoria tritici 13 days
TraesCS6B02G065300.1	201.338876	-3.419638725	1.083779648	-3.155289668	0.001603388	0.047047048	cv Sevin Septoria tritici 13 days
TraesCS6B02G110200.1	376.6009976	-1.740549522	0.533593716	-3.261937817	0.001106534	0.036664285	cv Sevin Septoria tritici 13 days
TraesCS6B02G115900.1	724.8171499	-2.441632547	0.672539956	-3.630464665	0.000282911	0.015226218	cv Sevin Septoria tritici 13 days
TraesCS6B02G122600.1	61.01682154	-3.471823833	0.960138092	-3.615963018	0.000299233	0.015668262	cv Sevin Septoria tritici 13 days
TraesCS6B02G122800.1	39.69774399	-8.245614412	2.479483506	-3.32553711	0.000882484	0.031683392	cv Sevin Septoria tritici 13 days
TraesCS6B02G134000.1	84.93915041	-5.690687011	1.188221586	-4.789247291	1.67408E-06	0.006914177	cv Sevin Septoria tritici 10 days
TraesCS6B02G134100.4	27.41938656	-7.632149334	2.366849743	-3.224602388	0.001261477	0.0401338	cv Sevin Septoria tritici 13 days
TraesCS6B02G137700.1	69.24761893	-8.95476692	2.148159638	-4.168576097	3.06508E-05	0.025660554	cv Sevin Septoria tritici 10 days
TraesCS6B02G146200.2	579.3822275	-2.902917155	0.749985184	-3.870632669	0.000108553	0.008038893	cv Sevin Septoria tritici 13 days
TraesCS6B02G161800.4	14.59639406	-20.08643342	4.20814392	-4.77322872	1.81296E-06	0.001032604	cv Sevin Septoria tritici 4 days
TraesCS6B02G161800.4	14.59639406	-20.35474166	5.495042554	-3.704200915	0.000212058	0.012536936	cv Sevin Septoria tritici 13 days
TraesCS6B02G177000.2	9.778751593	-20.42488738	4.209173625	-4.852469676	1.21933E-06	0.00089059	cv Sevin Septoria tritici 4 days
TraesCS6B02G177000.2	9.778751593	-19.82779313	5.49583111	-3.607787928	0.000308819	0.015939993	cv Sevin Septoria tritici 13 days
TraesCS6B02G204600.2	7.362824729	-19.89776045	4.210200207	-4.726084145	2.28891E-06	0.001238335	cv Sevin Septoria tritici 4 days
TraesCS6B02G212600.2	12.34707962	-6.683100038	1.71866283	-3.888546328	0.000100846	0.036657149	cv Sevin Septoria tritici 4 days
TraesCS6B02G218700.1	539.8792422	-1.564732827	0.396079708	-3.950550347	7.79717E-05	0.006419481	cv Sevin Septoria tritici 13 days
TraesCS6B02G227900.1	105.6549845	-6.969027025	2.044771854	-3.408217407	0.000653888	0.026121434	cv Sevin Septoria tritici 13 days
TraesCS6B02G231600.3	655.8800933	-12.17483021	2.190624339	-5.557698774	2.73355E-08	0.000282248	cv Sevin Septoria tritici 10 days
TraesCS6B02G239000.1	228.9269583	-3.62034796	0.966437267	-3.746076527	0.000179622	0.011246388	cv Sevin Septoria tritici 13 days
TraesCS6B02G243500.2	58.17188885	-5.165005486	1.510125585	-3.420248976	0.000625638	0.025349977	cv Sevin Septoria tritici 13 days
TraesCS6B02G247900.2	86.37092179	-9.313128026	2.13643512	-4.359190663	1.30544E-05	0.016508538	cv Sevin Septoria tritici 10 days
TraesCS6B02G249100.1	17.77479517	-6.96229655	2.205711791	-3.156485167	0.00159683	0.047006634	cv Sevin Septoria tritici 13 days
TraesCS6B02G251100.1	327.4939317	-4.560099474	1.385527887	-3.291236153	0.000997481	0.034480883	cv Sevin Septoria tritici 13 days
TraesCS6B02G264000.4	138.6443358	-9.794452778	2.233924291	-4.38441572	1.16297E-05	0.00163132	cv Sevin Septoria tritici 13 days
TraesCS6B02G266800.5	172.6440703	-1.709407646	0.530980545	-3.21934139	0.001284854	0.040672231	cv Sevin Septoria tritici 13 days
TraesCS6B02G272700.2	61.94437142	-2.900406279	0.650956785	-4.455604958	8.3657E-06	0.00125543	cv Sevin Septoria tritici 13 days
TraesCS6B02G282200.1	1577.993731	-3.140820885	0.957976688	-3.27859845	0.00104324	0.035394027	cv Sevin Septoria tritici 13 days
TraesCS6B02G284600.1	99.57498963	-1.951435607	0.607206583	-3.213791915	0.001309946	0.041190675	cv Sevin Septoria tritici 13 days
TraesCS6B02G292400.2	51.38040023	-3.093000767	0.938913007	-3.29423572	0.000986897	0.034202355	cv Sevin Septoria tritici 13 days
TraesCS6B02G294700.1	8663.93302	-1.310321252	0.407494307	-3.215557199	0.001301915	0.041029143	cv Sevin Septoria tritici 13 days
TraesCS6B02G298800.1	353.732079	-24.37274027	5.493509423	-4.436643025	9.13726E-06	0.014151793	cv Sevin Septoria tritici 10 days
TraesCS6B02G298800.1	353.732079	-24.29115721	5.493509423	-4.421792218	9.78856E-06	0.001421846	cv Sevin Septoria tritici 13 days
TraesCS6B02G304100.1	101.4367448	-9.15637422	2.211587668	-4.140181442	3.47031E-05	0.027921141	cv Sevin Septoria tritici 10 days
TraesCS6B02G309400.3	56.15672353	-14.70871459	3.42981051	-4.288491899	1.7989E-05	0.019551873	cv Sevin Septoria tritici 10 days
TraesCS6B02G315800.1	323.2510193	-2.612855175	0.81450164	-3.207918864	0.001336992	0.041730297	cv Sevin Septoria tritici 13 days
TraesCS6B02G323800.1	383.5102699	-3.229326298	0.590359059	-5.470105436	4.49768E-08	1.67852E-05	cv Sevin Septoria tritici 13 days
TraesCS6B02G331700.1	185.6843685	-3.687892909	0.787749308	-4.681556521	2.84705E-06	0.000541952	cv Sevin Septoria tritici 13 days
TraesCS6B02G333700.1	187.8504269	-5.400058905	1.103911487	-4.891749899	9.99434E-07	0.005159744	cv Sevin Septoria tritici 10 days
TraesCS6B02G336800.1	667.424611	-1.983325227	0.42895379	-4.623633766	3.77075E-06	0.000681209	cv Sevin Septoria tritici 13 days
TraesCS6B02G360500.1	18.40811139	-7.279201796	2.295256485	-3.171411058	0.001517003	0.045555066	cv Sevin Septoria tritici 13 days
TraesCS6B02G362700.1	28.19391063	-7.820072554	2.255009824	-3.467866291	0.000524608	0.02256719	cv Sevin Septoria tritici 13 days
TraesCS6B02G367600.2	68.63897585	-8.809714832	2.14355153	-4.109868463	3.95885E-05	0.004017343	cv Sevin Septoria tritici 13 days
TraesCS6B02G367600.3	32.25433339	-8.016841576	2.185575183	-3.668069457	0.000244389	0.013807967	cv Sevin Septoria tritici 13 days
TraesCS6B02G387400.1	2296.533715	-2.537268016	0.731868729	-3.46683485	0.000526625	0.022614193	cv Sevin Septoria tritici 13 days
TraesCS6B02G389500.1	71.94407756	-8.70345679	2.71098423	-3.210441689	0.001325312	0.041558664	cv Sevin Septoria tritici 13 days
TraesCS6B02G412100.1	189.2959386	-7.407515946	1.693298704	-4.374606754	1.21652E-05	0.001679639	cv Sevin Septoria tritici 13 days
TraesCS6B02G434700.3	79.76473963	-6.21540791	1.210579581	-5.134241489	2.83284E-07	0.000343223	cv Sevin Septoria tritici 4 days
TraesCS6B02G450500.1	960.5426661	-4.64134613	1.288849629	-3.601154104	0.000316808	0.016191752	cv Sevin Septoria tritici 13 days
TraesCS6B02G454500.1	257.4291616	-1.962826321	0.608302889	-3.2267253	0.001252156	0.039904386	cv Sevin Septoria tritici 13 days
TraesCS6B02G462300.2	397.3833132	-3.071323482	0.651679949	-4.712932299	2.44177E-06	0.000477628	cv Sevin Septoria tritici 13 days
TraesCS6B02G470800.2	36.85323902	-7.612086633	2.224160577	-3.422453717	0.000620587	0.025217333	cv Sevin Septoria tritici 13 days
TraesCS6D02G010100.1	29.64481899	-7.744931093	2.389889658	-3.24070656	0.001192339	0.038693704	cv Sevin Septoria tritici 13 days
TraesCS6D02G021200.1	527.4994588	-3.382755832	0.58370415	-5.795325988	6.81886E-09	3.90714E-06	cv Sevin Septoria tritici 13 days
TraesCS6D02G054900.1	1032.074968	-4.782753653	1.17656965	-4.064998322	4.80328E-05	0.019377212	cv Sevin Septoria tritici 4 days
TraesCS6D02G067200.2	27.25270804	-7.750047531	2.324828391	-3.333599831	0.000857299	0.031074213	cv Sevin Septoria tritici 13 days
TraesCS6D02G068500.4	43.97164771	-5.700460688	1.60762881	-3.545881146	0.000391303	0.018612786	cv Sevin Septoria tritici 13 days
TraesCS6D02G084300.1	160.6812321	-3.760458066	0.837117752	-4.492149472	7.05079E-06	0.001107931	cv Sevin Septoria tritici 13 days
TraesCS6D02G088800.1	95.78342902	-9.155951173	2.805210727	-3.263908513	0.001098866	0.036482832	cv Sevin Septoria tritici 13 days
TraesCS6D02G094200.1	571.2378279	-3.293819188	1.006290906	-3.27322762	0.001063268	0.035833446	cv Sevin Septoria tritici 13 days
TraesCS6D02G097500.1	50.43101338	-8.599742007	2.276933478	-3.776896467	0.000158795	0.010504388	cv Sevin Septoria tritici 13 days
TraesCS6D02G108000.1	457.2288464	-2.478321649	0.777732652	-3.186598432	0.001439565	0.044118288	cv Sevin Septoria tritici 13 days
TraesCS6D02G123900.1	228.0746558	-2.327758314	0.704547694	-3.303904524	0.000953483	0.033443527	cv Sevin Septoria tritici 13 days
TraesCS6D02G127600.3	19.84743301	-7.234218281	1.707530032	-4.236656543	2.26873E-05	0.010021315	cv Sevin Septoria tritici 4 days
TraesCS6D02G135500.2	11.61159671	-20.0927808	3.580984739	-5.610965214	2.01201E-08	3.69527E-05	cv Sevin Septoria tritici 4 days
TraesCS6D02G140000.2	58.9496228	-8.460152083	2.48085105	-3.41018139	0.000649197	0.026044089	cv Sevin Septoria tritici 13 days
TraesCS6D02G152700.1	6668.580189	-2.010659264	0.60915937	-3.30071138	0.0009644	0.033721297	cv Sevin Septoria tritici 13 days
TraesCS6D02G162200.1	1007.45784	-2.41255704	0.759183459	-3.177831407	0.00148381	0.044954182	cv Sevin Septoria tritici 13 days
TraesCS6D02G172500.2	33.95207348	-7.985770061	2.146531645	-3.720313223	0.000198976	0.012046002	cv Sevin Septoria tritici 13 days
TraesCS6D02G178300.4	14.36608499	-26.4147186	3.965468109	-6.661185485	2.71628E-11	4.73929E-07	cv Sevin Septoria tritici 4 days
TraesCS6D02G186800.2	62.70829382	-8.896578809	2.143498972	-4.150493621	3.31759E-05	0.027404179	cv Sevin Septoria tritici 10 days
TraesCS6D02G187800.1	104.2360979	-4.656220062	1.447478364	-3.216780422	0.001296378	0.040968426	cv Sevin Septoria tritici 13 days
TraesCS6D02G204200.1	242.7786381	-4.525820071	1.216633711	-3.719952875	0.00019926	0.012050341	cv Sevin Septoria tritici 13 days
TraesCS6D02G222300.1	113.8507511	-2.898865188	0.611324216	-4.741943984	2.11677E-06	0.000425801	cv Sevin Septoria tritici 13 days
TraesCS6D02G224200.1	1462.88666	-2.82086675	0.900011864	-3.134255071	0.00172291	0.049215831	cv Sevin Septoria tritici 13 days
TraesCS6D02G228700.3	7.592913001	-20.37534962	4.210073397	-4.83966613	1.30057E-06	0.000898697	cv Sevin Septoria tritici 4 days
TraesCS6D02G233000.4	28.24181444	-20.2198482	5.494846991	-3.679783665	0.000233432	0.013402488	cv Sevin Septoria tritici 13 days
TraesCS6D02G239200.1	42.50276021	-3.043475145	0.888191615	-3.426597473	0.000611194	0.024942886	cv Sevin Septoria tritici 13 days
TraesCS6D02G242600.1	38.95431665	-3.706901776	1.060622644	-3.495024169	0.000474019	0.021056533	cv Sevin Septoria tritici 13 days
TraesCS6D02G247400.1	10288.97762	-1.458897551	0.383287265	-3.80627713	0.000141074	0.009630061	cv Sevin Septoria tritici 13 days
TraesCS6D02G249300.3	31.77049293	-7.696748223	2.264974989	-3.398160359	0.000678406	0.02683632	cv Sevin Septoria tritici 13 days
TraesCS6D02G254900.2	65.76812604	-8.708179845	2.737016194	-3.181632562	0.001464475	0.044652413	cv Sevin Septoria tritici 13 days
TraesCS6D02G274300.1	386.8603361	-2.734694513	0.511064255	-5.350979813	8.74793E-08	2.94425E-05	cv Sevin Septoria tritici 13 days
TraesCS6D02G274300.2	86.64466639	-2.832220525	0.728402159	-3.888264869	0.000100963	0.007608986	cv Sevin Septoria tritici 13 days
TraesCS6D02G282000.1	193.9962012	-3.91007674	0.771746551	-5.066529593	4.05134E-07	0.00010542	cv Sevin Septoria tritici 13 days
TraesCS6D02G287300.1	682.6712253	-1.547530814	0.308503834	-5.016245003	5.26911E-07	0.000128281	cv Sevin Septoria tritici 13 days
TraesCS6D02G289000.3	112.6850197	-5.128883659	1.154287876	-4.443331481	8.85765E-06	0.001311904	cv Sevin Septoria tritici 13 days
TraesCS6D02G291600.1	2954.425288	-2.505090574	0.731173555	-3.426123053	0.000612263	0.024968531	cv Sevin Septoria tritici 13 days
TraesCS6D02G298300.1	615.1984428	-3.329410461	1.021280086	-3.2600366	0.001113978	0.036889397	cv Sevin Septoria tritici 13 days
TraesCS6D02G303300.1	49.94037008	-3.600298791	0.956287995	-3.764868753	0.000166637	0.010764926	cv Sevin Septoria tritici 13 days
TraesCS6D02G320500.2	20.29676055	-7.054859373	2.201840304	-3.204074047	0.001354976	0.042116374	cv Sevin Septoria tritici 13 days
TraesCS6D02G320800.1	342.901451	-4.847684424	1.476430375	-3.283381664	0.001025697	0.034966255	cv Sevin Septoria tritici 13 days
TraesCS6D02G323900.1	112.5667412	-3.182056169	0.669756902	-4.751061409	2.02352E-06	0.000412899	cv Sevin Septoria tritici 13 days
TraesCS6D02G358900.1	250.9107799	-7.849658131	1.794401398	-4.374527427	1.21696E-05	0.001679639	cv Sevin Septoria tritici 13 days
TraesCS6D02G371100.1	84.81698988	-2.000568896	0.635300585	-3.149011577	0.001638237	0.047634673	cv Sevin Septoria tritici 13 days
TraesCS6D02G378000.5	133.9302014	-8.117069321	1.755794595	-4.623017604	3.78198E-06	0.00195517	cv Sevin Septoria tritici 4 days
TraesCS6D02G390000.1	999.4136233	-4.085270749	1.080663983	-3.780333954	0.000156618	0.010419411	cv Sevin Septoria tritici 13 days
TraesCS6D02G392300.1	452.2248314	-1.599844546	0.443035022	-3.611101753	0.000304899	0.015809598	cv Sevin Septoria tritici 13 days
TraesCS6D02G397200.1	142.4220544	-2.969297461	0.70282663	-4.22479362	2.3916E-05	0.00276869	cv Sevin Septoria tritici 13 days
TraesCS7A02G020500.1	1213.627532	-1.844148877	0.456849558	-4.036665564	5.42163E-05	0.005050036	cv Sevin Septoria tritici 13 days
TraesCS7A02G078400.1	98.09351185	-3.623087321	1.144020279	-3.166978234	0.001540318	0.046009478	cv Sevin Septoria tritici 13 days
TraesCS7A02G112000.2	47.59618423	-8.659506662	1.640115953	-5.27981369	1.29315E-07	0.00016713	cv Sevin Septoria tritici 4 days
TraesCS7A02G112000.2	47.59618423	-8.827472325	2.27433522	-3.881341786	0.000103882	0.007763893	cv Sevin Septoria tritici 13 days
TraesCS7A02G118800.1	11.52016832	-20.65539683	4.208704294	-4.907780492	9.21129E-07	0.000778012	cv Sevin Septoria tritici 4 days
TraesCS7A02G118800.1	11.52016832	-19.44870136	5.495471683	-3.539041321	0.000401583	0.018842181	cv Sevin Septoria tritici 13 days
TraesCS7A02G118800.4	88.10647245	-9.176332508	2.240177846	-4.096251788	4.19893E-05	0.004178748	cv Sevin Septoria tritici 13 days
TraesCS7A02G131300.2	23.65349439	-7.450908432	1.655031552	-4.501973647	6.73253E-06	0.003240484	cv Sevin Septoria tritici 4 days
TraesCS7A02G137000.2	253.0851712	-9.94210152	2.13234227	-4.662526115	3.12351E-06	0.00166407	cv Sevin Septoria tritici 4 days
TraesCS7A02G156000.1	118.778812	-7.316509456	1.525273393	-4.796851167	1.61179E-06	0.006914177	cv Sevin Septoria tritici 10 days
TraesCS7A02G183100.1	207.0273623	-2.187735104	0.425859935	-5.137217486	2.78836E-07	7.71574E-05	cv Sevin Septoria tritici 13 days
TraesCS7A02G200200.1	112.9500534	-2.091881614	0.503357227	-4.155858906	3.24068E-05	0.003509699	cv Sevin Septoria tritici 13 days
TraesCS7A02G215200.2	181.415312	-6.666816665	1.534527777	-4.344539582	1.39568E-05	0.001871664	cv Sevin Septoria tritici 13 days
TraesCS7A02G215200.4	88.24603443	-8.867083472	2.185286077	-4.057630516	4.95731E-05	0.019883662	cv Sevin Septoria tritici 4 days
TraesCS7A02G227100.1	6760.636137	-2.380753693	0.673657239	-3.53407275	0.000409208	0.019084613	cv Sevin Septoria tritici 13 days
TraesCS7A02G236800.1	44.54195612	-2.324426935	0.674339933	-3.446966169	0.00056692	0.023681207	cv Sevin Septoria tritici 13 days
TraesCS7A02G239200.1	32.39338598	-7.94891715	1.562268163	-5.088061923	3.61741E-07	0.000400735	cv Sevin Septoria tritici 4 days
TraesCS7A02G239200.1	32.39338598	-8.116885978	2.180428653	-3.722610216	0.000197174	0.011988082	cv Sevin Septoria tritici 13 days
TraesCS7A02G262200.2	107.11207	-1.612733755	0.498882005	-3.232695786	0.001226281	0.039413898	cv Sevin Septoria tritici 13 days
TraesCS7A02G266500.1	212.4045635	-2.025304818	0.577392515	-3.507674185	0.000452042	0.02048691	cv Sevin Septoria tritici 13 days
TraesCS7A02G268600.1	102.5120381	-5.513983921	0.968407845	-5.693865401	1.24195E-08	0.000210185	cv Sevin Septoria tritici 10 days
TraesCS7A02G276400.1	2577.31588	-4.933545931	0.639789568	-7.711200957	1.24639E-14	5.8919E-11	cv Sevin Septoria tritici 13 days
TraesCS7A02G285800.3	178.5785826	-10.65563199	2.343665003	-4.546567864	5.45278E-06	0.010420069	cv Sevin Septoria tritici 10 days
TraesCS7A02G285800.4	90.43744665	-9.212824624	2.245444332	-4.102896026	4.08011E-05	0.00410369	cv Sevin Septoria tritici 13 days
TraesCS7A02G286700.3	61.14864059	-8.86792867	2.211724923	-4.009507954	6.08454E-05	0.005418393	cv Sevin Septoria tritici 13 days
TraesCS7A02G286700.4	258.1635897	-2.73832759	0.702819157	-3.896205108	9.77116E-05	0.007500394	cv Sevin Septoria tritici 13 days
TraesCS7A02G295800.4	13.66998599	-19.86136907	5.495254209	-3.614276668	0.000301187	0.015688844	cv Sevin Septoria tritici 13 days
TraesCS7A02G299600.4	86.14301582	-9.222096601	2.119123891	-4.351844005	1.34997E-05	0.016508538	cv Sevin Septoria tritici 10 days
TraesCS7A02G307000.1	498.3255784	-2.355805527	0.74600806	-3.157882135	0.001589198	0.046934549	cv Sevin Septoria tritici 13 days
TraesCS7A02G325000.1	22.12313979	-7.481683063	2.214223063	-3.378920212	0.000727711	0.028177576	cv Sevin Septoria tritici 13 days
TraesCS7A02G329700.3	36.59019347	-8.587959168	1.581359717	-5.430743604	5.61197E-08	8.3333E-05	cv Sevin Septoria tritici 4 days
TraesCS7A02G329700.3	36.59019347	-8.855220688	2.203839245	-4.018088301	5.86722E-05	0.037090417	cv Sevin Septoria tritici 10 days
TraesCS7A02G329700.3	36.59019347	-8.755926137	2.203839245	-3.973033041	7.09632E-05	0.005978803	cv Sevin Septoria tritici 13 days
TraesCS7A02G330200.2	27.99445062	-7.933261096	2.165638452	-3.663243553	0.000249042	0.013959615	cv Sevin Septoria tritici 13 days
TraesCS7A02G335600.1	757.1736425	-2.024276935	0.373673176	-5.417239081	6.05264E-08	2.14589E-05	cv Sevin Septoria tritici 13 days
TraesCS7A02G347300.1	17.9728455	-7.224733896	2.201453622	-3.281801544	0.001031462	0.035099399	cv Sevin Septoria tritici 13 days
TraesCS7A02G357700.1	26.87226621	-7.666431013	2.42055892	-3.167215203	0.001539064	0.046009478	cv Sevin Septoria tritici 13 days
TraesCS7A02G365600.1	39.47734278	-8.090400354	2.205958607	-3.66752138	0.000244913	0.01382382	cv Sevin Septoria tritici 13 days
TraesCS7A02G383700.1	17.51986424	-7.263679598	2.29662181	-3.162766967	0.001562774	0.046340775	cv Sevin Septoria tritici 13 days
TraesCS7A02G385000.1	419.3792239	-1.590790555	0.47147864	-3.374045866	0.00074072	0.028352292	cv Sevin Septoria tritici 13 days
TraesCS7A02G394500.4	66.84027514	-8.87234591	2.248703934	-3.945537595	7.96211E-05	0.006517444	cv Sevin Septoria tritici 13 days
TraesCS7A02G411300.1	84.08878779	-4.10821764	1.252735778	-3.279396751	0.001040293	0.03535684	cv Sevin Septoria tritici 13 days
TraesCS7A02G450600.1	609.3645989	-3.89296983	1.184494903	-3.2866075	0.001014021	0.034696617	cv Sevin Septoria tritici 13 days
TraesCS7A02G454100.1	57.8360088	-2.534852453	0.788284776	-3.215655725	0.001301469	0.041029143	cv Sevin Septoria tritici 13 days
TraesCS7A02G461700.4	22.82504516	-20.02287126	3.299149364	-6.069101169	1.28628E-09	8.16099E-06	cv Sevin Septoria tritici 4 days
TraesCS7A02G485300.1	587.1326885	-1.986397307	0.514194866	-3.863121629	0.000111947	0.00821516	cv Sevin Septoria tritici 13 days
TraesCS7A02G515000.1	36.68624425	-7.728446061	2.18902345	-3.530545121	0.000414704	0.01925083	cv Sevin Septoria tritici 13 days
TraesCS7A02G517700.2	217.2180384	-3.302543005	0.733003832	-4.50549214	6.62193E-06	0.010795835	cv Sevin Septoria tritici 10 days
TraesCS7A02G517700.2	217.2180384	-4.238871259	0.768503579	-5.515746935	3.47302E-08	1.37769E-05	cv Sevin Septoria tritici 13 days
TraesCS7A02G557100.1	320.9387494	-1.677254578	0.484714145	-3.460296334	0.000539581	0.022961954	cv Sevin Septoria tritici 13 days
TraesCS7B02G001500.2	58.86382187	-8.336856133	2.115942087	-3.940020941	8.14745E-05	0.006659542	cv Sevin Septoria tritici 13 days
TraesCS7B02G003100.3	33.6699704	-7.815571672	1.726301339	-4.527350756	5.97278E-06	0.002956354	cv Sevin Septoria tritici 4 days
TraesCS7B02G006600.1	537.2557854	-2.033915088	0.546532914	-3.721486911	0.000198053	0.012002951	cv Sevin Septoria tritici 13 days
TraesCS7B02G038300.2	28.43683569	-20.1569003	4.209484209	-4.788448965	1.68075E-06	0.0009803	cv Sevin Septoria tritici 4 days
TraesCS7B02G060100.3	11.12743531	-20.46139315	4.208797015	-4.861577568	1.16454E-06	0.00089059	cv Sevin Septoria tritici 4 days
TraesCS7B02G060100.3	11.12743531	-19.59986437	5.49554269	-3.566502069	0.000361778	0.01770683	cv Sevin Septoria tritici 13 days
TraesCS7B02G060100.4	96.50226203	-9.330379122	2.194318143	-4.252063062	2.1181E-05	0.021164621	cv Sevin Septoria tritici 10 days
TraesCS7B02G073800.1	32.84381632	-7.661124106	2.14832153	-3.566097532	0.000362337	0.017718883	cv Sevin Septoria tritici 13 days
TraesCS7B02G088100.1	344.8412577	-2.268148235	0.390403228	-5.809757887	6.25633E-09	3.62139E-06	cv Sevin Septoria tritici 13 days
TraesCS7B02G095300.3	12.99998741	-21.28841238	4.208400613	-5.058551773	4.22453E-07	0.000460678	cv Sevin Septoria tritici 4 days
TraesCS7B02G095300.3	12.99998741	-19.73746615	5.495239124	-3.591739268	0.000328478	0.016492411	cv Sevin Septoria tritici 13 days
TraesCS7B02G103400.1	118.9859193	-5.292149885	1.277131685	-4.143777768	3.41631E-05	0.003649595	cv Sevin Septoria tritici 13 days
TraesCS7B02G140600.1	40.86568495	-8.152543289	2.446445648	-3.332403193	0.000860994	0.031168319	cv Sevin Septoria tritici 13 days
TraesCS7B02G142200.2	123.6148134	-2.316163401	0.467171465	-4.957844335	7.12796E-07	0.000632664	cv Sevin Septoria tritici 4 days
TraesCS7B02G142700.1	231.1880148	-2.108307272	0.621821968	-3.390531984	0.000697571	0.027384374	cv Sevin Septoria tritici 13 days
TraesCS7B02G149200.1	6264.124927	-1.153769431	0.365087297	-3.160256299	0.001576304	0.046693173	cv Sevin Septoria tritici 13 days
TraesCS7B02G158700.2	43.66719233	-8.553577396	2.695623188	-3.173135412	0.001508022	0.045357391	cv Sevin Septoria tritici 13 days
TraesCS7B02G166000.3	200.6676772	-1.900437785	0.580542373	-3.273555683	0.001062035	0.035833446	cv Sevin Septoria tritici 13 days
TraesCS7B02G181900.3	47.32577133	-8.311257391	2.421801326	-3.431849384	0.00059948	0.024588666	cv Sevin Septoria tritici 13 days
TraesCS7B02G183200.1	8.752924231	-20.08122761	4.209542561	-4.770406124	1.83855E-06	0.001032604	cv Sevin Septoria tritici 4 days
TraesCS7B02G185500.1	84.09241797	-2.210796328	0.600282032	-3.682929376	0.000230569	0.013334664	cv Sevin Septoria tritici 13 days
TraesCS7B02G188000.4	75.82873203	-8.980347064	2.129254128	-4.21760228	2.46914E-05	0.002846836	cv Sevin Septoria tritici 13 days
TraesCS7B02G189500.2	1165.708307	-1.145065881	0.326298833	-3.509255214	0.000449363	0.020441534	cv Sevin Septoria tritici 13 days
TraesCS7B02G189900.3	93.43844917	-2.905809064	0.703666993	-4.129523047	3.63517E-05	0.003780455	cv Sevin Septoria tritici 13 days
TraesCS7B02G196900.3	14.55256556	-19.9181329	5.49520426	-3.624639223	0.000289365	0.015427185	cv Sevin Septoria tritici 13 days
TraesCS7B02G197000.1	53.01355625	-8.302394309	2.276100248	-3.64764	0.00026466	0.01455534	cv Sevin Septoria tritici 13 days
TraesCS7B02G199200.1	388.1228113	-3.10007466	0.755266041	-4.1046128	4.04993E-05	0.004087369	cv Sevin Septoria tritici 13 days
TraesCS7B02G207300.1	408.8289512	-3.500033951	0.933710692	-3.748520799	0.000177881	0.011171648	cv Sevin Septoria tritici 13 days
TraesCS7B02G210000.1	118.7677008	-3.842626871	0.857110034	-4.483236361	7.35194E-06	0.001142592	cv Sevin Septoria tritici 13 days
TraesCS7B02G230500.1	57.7544184	-2.803505328	0.765754082	-3.661103992	0.000251131	0.014035119	cv Sevin Septoria tritici 13 days
TraesCS7B02G233600.1	104.3286196	-9.673038022	2.126007701	-4.549860294	5.36815E-06	0.010420069	cv Sevin Septoria tritici 10 days
TraesCS7B02G239200.4	20.25652636	-7.571253161	1.805933286	-4.192432367	2.75979E-05	0.011963277	cv Sevin Septoria tritici 4 days
TraesCS7B02G242800.1	252.766741	-2.550810718	0.564650754	-4.517501659	6.25735E-06	0.001020427	cv Sevin Septoria tritici 13 days
TraesCS7B02G247200.1	511.3098491	-1.331212282	0.413407471	-3.220097301	0.001281471	0.040587784	cv Sevin Septoria tritici 13 days
TraesCS7B02G248000.1	174.0842537	-3.571851889	0.885742003	-4.032609806	5.51608E-05	0.005112832	cv Sevin Septoria tritici 13 days
TraesCS7B02G264800.1	353.2255815	-3.393761494	0.793829772	-4.275175373	1.90987E-05	0.002370661	cv Sevin Septoria tritici 13 days
TraesCS7B02G269300.2	224.7435944	-10.78958421	2.291872383	-4.7077596	2.50454E-06	0.007999481	cv Sevin Septoria tritici 10 days
TraesCS7B02G285700.2	47.28143567	-3.880982748	0.918122018	-4.227088201	2.36735E-05	0.022563384	cv Sevin Septoria tritici 10 days
TraesCS7B02G285700.2	47.28143567	-3.044723175	0.839160868	-3.628294992	0.000285299	0.015275345	cv Sevin Septoria tritici 13 days
TraesCS7B02G350400.1	692.1650172	-5.054144399	1.276474706	-3.959455188	7.51209E-05	0.006239107	cv Sevin Septoria tritici 13 days
TraesCS7B02G358300.2	10.81411406	-6.829710919	1.789291617	-3.816991515	0.000135089	0.047139917	cv Sevin Septoria tritici 4 days
TraesCS7B02G363100.1	158.5295877	-4.338893162	0.685852536	-6.326277059	2.51147E-10	2.4747E-07	cv Sevin Septoria tritici 13 days
TraesCS7B02G365500.1	147.1477362	-2.486849193	0.750660332	-3.312882121	0.000923399	0.032656313	cv Sevin Septoria tritici 13 days
TraesCS7B02G382800.1	467.8516429	-2.740072622	0.844884844	-3.243131464	0.001182236	0.038527628	cv Sevin Septoria tritici 13 days
TraesCS7B02G382800.3	185.6131205	-9.962690828	2.434394433	-4.092471907	4.26799E-05	0.004223983	cv Sevin Septoria tritici 13 days
TraesCS7B02G388800.1	140.1433228	-3.801784532	1.144211896	-3.3226228	0.000891754	0.031884096	cv Sevin Septoria tritici 13 days
TraesCS7B02G391800.1	54.69512687	-8.528116848	2.371952922	-3.595398868	0.000323895	0.016360876	cv Sevin Septoria tritici 13 days
TraesCS7B02G404300.1	34.64729958	-3.822353337	0.983073417	-3.888166715	0.000101004	0.007608986	cv Sevin Septoria tritici 13 days
TraesCS7B02G411600.1	100.1509479	-3.588512316	1.10966238	-3.233877601	0.001221218	0.039293705	cv Sevin Septoria tritici 13 days
TraesCS7B02G433800.1	450.2546703	-2.873739977	0.787021927	-3.651410308	0.000260804	0.014413042	cv Sevin Septoria tritici 13 days
TraesCS7B02G492100.1	23.65738352	-7.171284499	2.291466146	-3.129561618	0.001750674	0.049551919	cv Sevin Septoria tritici 13 days
TraesCS7D02G000300.1	5336.566623	-2.056475039	0.610810528	-3.366796976	0.000760467	0.028841776	cv Sevin Septoria tritici 13 days
TraesCS7D02G004500.1	226.5906663	-4.879853939	1.211572545	-4.027702643	5.63245E-05	0.005178387	cv Sevin Septoria tritici 13 days
TraesCS7D02G035700.1	373.6488437	-2.726819127	0.71574242	-3.809777164	0.000139092	0.009570934	cv Sevin Septoria tritici 13 days
TraesCS7D02G074500.1	61.6551917	-3.877149934	0.910662409	-4.257505191	2.06721E-05	0.002521817	cv Sevin Septoria tritici 13 days
TraesCS7D02G081700.2	76.06700862	-8.926711902	2.140540441	-4.170307522	3.04189E-05	0.003357085	cv Sevin Septoria tritici 13 days
TraesCS7D02G103500.1	295.3091851	-2.499057061	0.449977011	-5.553743853	2.79615E-08	1.19381E-05	cv Sevin Septoria tritici 13 days
TraesCS7D02G114100.3	24.97066806	-4.529377453	1.111468518	-4.075128875	4.59889E-05	0.018880055	cv Sevin Septoria tritici 4 days
TraesCS7D02G119700.3	8.053089547	-20.0443028	4.209843797	-4.761293712	1.92356E-06	0.001065453	cv Sevin Septoria tritici 4 days
TraesCS7D02G125800.1	55.57857347	-6.079202682	1.688468763	-3.60042354	0.000317699	0.016208792	cv Sevin Septoria tritici 13 days
TraesCS7D02G137200.1	645.4892939	-5.659738381	1.476931947	-3.832091514	0.000127058	0.045242534	cv Sevin Septoria tritici 4 days
TraesCS7D02G159800.1	11.06893216	-20.5612448	4.208811421	-4.885285355	1.03279E-06	0.000824806	cv Sevin Septoria tritici 4 days
TraesCS7D02G159800.1	11.06893216	-19.90603132	5.495553722	-3.622206665	0.000292101	0.015478918	cv Sevin Septoria tritici 13 days
TraesCS7D02G159800.3	383.7678587	-2.004835265	0.617768146	-3.245287537	0.001173321	0.038383966	cv Sevin Septoria tritici 13 days
TraesCS7D02G167400.2	52.20568521	-8.890833648	2.63698573	-3.371589595	0.000747357	0.028529332	cv Sevin Septoria tritici 13 days
TraesCS7D02G198400.2	24.83302031	-3.102046651	0.959808138	-3.23194452	0.001229509	0.03942631	cv Sevin Septoria tritici 13 days
TraesCS7D02G199300.3	198.0278188	-2.613307335	0.82589557	-3.16421038	0.001555043	0.046241881	cv Sevin Septoria tritici 13 days
TraesCS7D02G210400.2	27.9519283	-7.470998835	1.740528225	-4.292374422	1.76773E-05	0.00809023	cv Sevin Septoria tritici 4 days
TraesCS7D02G217100.5	116.5060551	-9.285165255	2.146208372	-4.32631117	1.51627E-05	0.002007862	cv Sevin Septoria tritici 13 days
TraesCS7D02G218000.1	20.67754984	-7.140400858	2.18266538	-3.27141344	0.001070113	0.035961643	cv Sevin Septoria tritici 13 days
TraesCS7D02G227300.1	4639.029939	-2.620226448	0.777502766	-3.37005418	0.000751534	0.028630974	cv Sevin Septoria tritici 13 days
TraesCS7D02G249200.1	208.664469	-2.231558709	0.580582494	-3.843654836	0.000121215	0.008670956	cv Sevin Septoria tritici 13 days
TraesCS7D02G268300.1	202.4567746	-2.90647085	0.824272466	-3.526104497	0.000421721	0.019493872	cv Sevin Septoria tritici 13 days
TraesCS7D02G269500.5	23.58350081	-20.89017088	4.20806212	-4.964320935	6.89419E-07	0.000627067	cv Sevin Septoria tritici 4 days
TraesCS7D02G276300.1	10334.89686	-3.477500929	0.647003922	-5.374775655	7.66781E-08	2.63615E-05	cv Sevin Septoria tritici 13 days
TraesCS7D02G279700.2	44.39554811	-2.919610377	0.834551419	-3.498418802	0.000468026	0.020946539	cv Sevin Septoria tritici 13 days
TraesCS7D02G283600.1	450.4362022	-2.334062186	0.69146783	-3.375518114	0.000736768	0.02831768	cv Sevin Septoria tritici 13 days
TraesCS7D02G305000.1	129.5212129	-2.708713401	0.589444863	-4.595363489	4.31996E-06	0.000756339	cv Sevin Septoria tritici 13 days
TraesCS7D02G305100.1	21.44826237	-7.265195543	2.193290973	-3.312463158	0.000924783	0.032669525	cv Sevin Septoria tritici 13 days
TraesCS7D02G306700.1	71.1669415	-8.856894282	2.405489069	-3.681951582	0.000231455	0.013370201	cv Sevin Septoria tritici 13 days
TraesCS7D02G327700.1	904.3991192	-3.262445356	1.031186205	-3.163779093	0.00155735	0.046252466	cv Sevin Septoria tritici 13 days
TraesCS7D02G336600.2	410.9978583	-2.739966818	0.747550245	-3.665261079	0.000247086	0.013877448	cv Sevin Septoria tritici 13 days
TraesCS7D02G343300.1	675.1525273	-1.272867858	0.354822472	-3.587337216	0.000334072	0.016711268	cv Sevin Septoria tritici 13 days
TraesCS7D02G352400.1	88.26258238	-3.83206497	0.698420821	-5.48675649	4.09381E-08	1.56564E-05	cv Sevin Septoria tritici 13 days
TraesCS7D02G359900.1	407.7459729	-2.72687741	0.781976442	-3.487160564	0.000488178	0.021483627	cv Sevin Septoria tritici 13 days
TraesCS7D02G370400.1	49.26081602	-8.636274773	2.359240656	-3.660616289	0.000251609	0.014035549	cv Sevin Septoria tritici 13 days
TraesCS7D02G375700.1	75.33239894	-8.937693576	2.228740824	-4.010198709	6.06677E-05	0.00541106	cv Sevin Septoria tritici 13 days
TraesCS7D02G388900.1	76.34925068	-8.017973105	2.399290305	-3.341810322	0.000832339	0.030500822	cv Sevin Septoria tritici 13 days
TraesCS7D02G388900.2	62.804124	-8.988493026	1.621625783	-5.542889808	2.9752E-08	5.06445E-05	cv Sevin Septoria tritici 4 days
TraesCS7D02G388900.2	62.804124	-9.255752773	2.252330826	-4.109410867	3.9667E-05	0.030718108	cv Sevin Septoria tritici 10 days
TraesCS7D02G419700.1	176.6748415	-2.608268675	0.826268424	-3.156684438	0.001595739	0.047006634	cv Sevin Septoria tritici 13 days
TraesCS7D02G439900.1	686.2230309	-5.451320908	1.244867174	-4.379038199	1.19204E-05	0.001657348	cv Sevin Septoria tritici 13 days
TraesCS7D02G448500.1	45.40898892	-2.453188677	0.740190688	-3.314265792	0.000918841	0.032544413	cv Sevin Septoria tritici 13 days
TraesCS7D02G449700.1	36.71562303	-7.720008825	1.79544132	-4.299783424	1.70965E-05	0.007901871	cv Sevin Septoria tritici 4 days
TraesCS7D02G449900.2	34.00785835	-8.098373148	2.270278287	-3.567127958	0.000360915	0.017695142	cv Sevin Septoria tritici 13 days
TraesCS7D02G451900.2	10.63209918	-20.38326645	4.208988655	-4.842794343	1.28026E-06	0.000893505	cv Sevin Septoria tritici 4 days
TraesCS7D02G454700.2	225.3658465	-2.961673017	0.910726151	-3.251990747	0.001145998	0.037685713	cv Sevin Septoria tritici 13 days
TraesCS7D02G472600.1	1004.578204	-1.42050056	0.380385936	-3.734366663	0.000188188	0.011616063	cv Sevin Septoria tritici 13 days
TraesCS7D02G492200.3	45.02335638	-8.460370806	2.510010966	-3.370650934	0.000749908	0.028588232	cv Sevin Septoria tritici 13 days
TraesCS7D02G499300.1	73.76977714	-2.330329437	0.740326875	-3.147703418	0.001645586	0.047772513	cv Sevin Septoria tritici 13 days
TraesCS7D02G507200.1	15.185826	-20.88730923	4.20806243	-4.96364053	6.91839E-07	0.000627067	cv Sevin Septoria tritici 4 days
TraesCS7D02G507200.1	15.185826	-20.04610223	5.494980152	-3.648075457	0.000264212	0.014551158	cv Sevin Septoria tritici 13 days
TraesCS7D02G548400.1	89.46525436	-9.566551811	2.574043023	-3.716546975	0.000201964	0.012110588	cv Sevin Septoria tritici 13 days
TraesCSU02G019000.1	265.3825986	-2.09635242	0.506779179	-4.13661908	3.5246E-05	0.003723217	cv Sevin Septoria tritici 13 days
TraesCSU02G022800.1	558.0644513	-2.985831524	0.852546329	-3.502251341	0.000461344	0.020819579	cv Sevin Septoria tritici 13 days
TraesCSU02G023100.1	119.6014503	-5.101830307	0.874017934	-5.837214668	5.30807E-09	3.23769E-06	cv Sevin Septoria tritici 13 days
TraesCSU02G077300.1	1060.145866	-2.507460885	0.664181089	-3.775266907	0.000159836	0.010506235	cv Sevin Septoria tritici 13 days
TraesCSU02G077900.1	95.34265597	-1.848406444	0.582072294	-3.175561635	0.001495467	0.0451714	cv Sevin Septoria tritici 13 days
TraesCSU02G092300.1	113.0372727	-9.553967188	2.509747859	-3.806743834	0.000140808	0.009629081	cv Sevin Septoria tritici 13 days
TraesCSU02G093000.1	11.92427359	-21.56954014	4.208615847	-5.125091224	2.97394E-07	0.000345923	cv Sevin Septoria tritici 4 days
TraesCSU02G093000.1	11.92427359	-21.76885206	5.495403949	-3.961283331	7.4548E-05	0.043286492	cv Sevin Septoria tritici 10 days
TraesCSU02G093000.1	11.92427359	-21.78873858	5.495403949	-3.964902087	7.34261E-05	0.006143315	cv Sevin Septoria tritici 13 days
TraesCSU02G098700.1	48.26537993	-3.413494705	0.917192103	-3.721679128	0.000197902	0.012002951	cv Sevin Septoria tritici 13 days
TraesCSU02G107600.2	356.858133	-3.130102998	0.743735217	-4.208625501	2.56929E-05	0.00292075	cv Sevin Septoria tritici 13 days
TraesCSU02G108900.1	182.1934447	-1.764394374	0.52117827	-3.385395126	0.000710759	0.027792339	cv Sevin Septoria tritici 13 days
TraesCSU02G122800.1	92.76506797	-3.286112327	0.639567698	-5.138021095	2.77647E-07	7.71574E-05	cv Sevin Septoria tritici 13 days
TraesCSU02G135100.4	102.053566	-19.4586825	5.495867315	-3.540602671	0.000399214	0.018769268	cv Sevin Septoria tritici 13 days
TraesCSU02G138800.1	33.16226509	-3.881176869	1.188017017	-3.2669371	0.001087178	0.036262232	cv Sevin Septoria tritici 13 days
TraesCSU02G138900.1	233.0679617	-2.509651829	0.608101248	-4.127029569	3.67479E-05	0.003803414	cv Sevin Septoria tritici 13 days
TraesCSU02G169600.1	268.3255318	-2.454076775	0.691739607	-3.547688681	0.000388627	0.018525438	cv Sevin Septoria tritici 13 days
TraesCSU02G209300.1	970.0832784	-4.849641218	0.962719895	-5.037437415	4.71806E-07	0.000118423	cv Sevin Septoria tritici 13 days
TraesCSU02G250000.1	63.76516614	-8.991175259	2.399874313	-3.746519229	0.000179305	0.011238973	cv Sevin Septoria tritici 13 days
TraesCSU02G270200.1	18.52160881	-19.46471765	4.758631258	-4.090402595	4.30625E-05	0.031759622	cv Sevin Septoria tritici 10 days
TraesCS1A02G002500.1	162.7457171	2.450205239	0.466473163	5.252617798	1.49952E-07	4.67585E-05	cv Sevin Septoria tritici 13 days
TraesCS1A02G015300.1	174.3933088	1.399793954	0.427826515	3.271872837	0.001068376	0.035924545	cv Sevin Septoria tritici 13 days
TraesCS1A02G021400.1	18.54033682	3.798202894	1.208478589	3.142962507	0.001672473	0.048207663	cv Sevin Septoria tritici 13 days
TraesCS1A02G029800.1	32.42472654	2.442071329	0.754759219	3.235563432	0.001214029	0.039182657	cv Sevin Septoria tritici 13 days
TraesCS1A02G037800.1	13.04945477	7.618849467	1.98572451	3.836810911	0.000124642	0.008860229	cv Sevin Septoria tritici 13 days
TraesCS1A02G043900.1	15.32793594	9.373990441	2.903669631	3.228325406	0.001245172	0.039782326	cv Sevin Septoria tritici 13 days
TraesCS1A02G048700.1	27.04218832	3.746603443	0.966299867	3.877267886	0.000105636	0.007874257	cv Sevin Septoria tritici 13 days
TraesCS1A02G070400.1	114.9321545	2.668213144	0.826702069	3.227538969	0.0012486	0.039835828	cv Sevin Septoria tritici 13 days
TraesCS1A02G078200.1	41.42500819	10.10711624	1.847446333	5.470857832	4.47862E-08	1.67852E-05	cv Sevin Septoria tritici 13 days
TraesCS1A02G079700.2	220.6249196	1.622939035	0.382716553	4.240577056	2.22946E-05	0.002640256	cv Sevin Septoria tritici 13 days
TraesCS1A02G091300.1	110.276384	1.968314367	0.519097562	3.791800446	0.000149559	0.010052	cv Sevin Septoria tritici 13 days
TraesCS1A02G095800.2	43.66972536	2.928404352	0.889999396	3.2903442	0.001000649	0.03450627	cv Sevin Septoria tritici 13 days
TraesCS1A02G110300.1	284.5567878	1.320707481	0.421401856	3.134080837	0.001723934	0.049215831	cv Sevin Septoria tritici 13 days
TraesCS1A02G122500.1	541.9435046	2.163982875	0.551902182	3.920953649	8.81992E-05	0.007007268	cv Sevin Septoria tritici 13 days
TraesCS1A02G150100.1	185.6501572	2.689378367	0.744405702	3.612785825	0.000302925	0.015746126	cv Sevin Septoria tritici 13 days
TraesCS1A02G177000.1	33.10103719	2.436156797	0.749235486	3.251523508	0.001147883	0.037725841	cv Sevin Septoria tritici 13 days
TraesCS1A02G178100.1	90.65567549	1.558395313	0.495073905	3.147803387	0.001645023	0.047772513	cv Sevin Septoria tritici 13 days
TraesCS1A02G198500.1	125.6388924	1.589788382	0.466357358	3.408948856	0.000652137	0.02608589	cv Sevin Septoria tritici 13 days
TraesCS1A02G211500.1	40.87391677	5.118260876	0.778163508	6.577359161	4.78877E-11	7.75908E-08	cv Sevin Septoria tritici 13 days
TraesCS1A02G246400.1	74.11481385	2.287328189	0.687101126	3.328954211	0.000871727	0.031456492	cv Sevin Septoria tritici 13 days
TraesCS1A02G246500.1	33.10201293	2.242402941	0.675622346	3.319018315	0.000903345	0.032187909	cv Sevin Septoria tritici 13 days
TraesCS1A02G266600.1	41.97054441	5.114680289	1.090192872	4.691537087	2.7116E-06	0.007999481	cv Sevin Septoria tritici 10 days
TraesCS1A02G266600.1	41.97054441	6.95813515	1.081790059	6.432056842	1.25889E-10	1.55243E-07	cv Sevin Septoria tritici 13 days
TraesCS1A02G280400.1	52.48560257	2.28474479	0.652730092	3.500290269	0.000464752	0.020923421	cv Sevin Septoria tritici 13 days
TraesCS1A02G296300.1	35.77717476	2.553349215	0.766600168	3.330744397	0.000866141	0.031314666	cv Sevin Septoria tritici 13 days
TraesCS1A02G312300.1	50.81640651	3.300333042	0.895920715	3.683733379	0.000229843	0.013317727	cv Sevin Septoria tritici 13 days
TraesCS1A02G325400.1	236.2436525	2.660805404	0.514150757	5.175146329	2.27732E-07	6.45917E-05	cv Sevin Septoria tritici 13 days
TraesCS1A02G340300.1	24.77649769	3.174098589	0.96529815	3.2882054	0.001008282	0.034622174	cv Sevin Septoria tritici 13 days
TraesCS1A02G349900.2	46.72277818	4.821570493	1.276541007	3.777058838	0.000158691	0.010504388	cv Sevin Septoria tritici 13 days
TraesCS1A02G351000.1	28.97495531	7.110845291	1.871688998	3.799159636	0.000145188	0.009804654	cv Sevin Septoria tritici 13 days
TraesCS1A02G358100.1	78.9019362	3.084084479	0.896922035	3.438520136	0.000584903	0.024218401	cv Sevin Septoria tritici 13 days
TraesCS1A02G384300.1	16.60197261	4.893380068	1.300057416	3.763972275	0.000167235	0.010764926	cv Sevin Septoria tritici 13 days
TraesCS1A02G386500.1	32.82720264	5.510227779	1.071256854	5.143703638	2.69374E-07	7.52735E-05	cv Sevin Septoria tritici 13 days
TraesCS1A02G404500.1	1238.358557	2.135792803	0.553482324	3.858827486	0.000113932	0.008311065	cv Sevin Septoria tritici 13 days
TraesCS1B02G001800.1	205.279514	2.439053558	0.487428837	5.00391724	5.61769E-07	0.000134459	cv Sevin Septoria tritici 13 days
TraesCS1B02G004600.1	62.87264648	3.159829977	0.818979534	3.858252674	0.000114201	0.008311065	cv Sevin Septoria tritici 13 days
TraesCS1B02G008200.1	52.34190807	1.779986477	0.535730107	3.3225433	0.000892008	0.031884096	cv Sevin Septoria tritici 13 days
TraesCS1B02G045400.1	19.09023445	3.807858825	1.10440458	3.447883948	0.000564997	0.023620685	cv Sevin Septoria tritici 13 days
TraesCS1B02G056900.1	50.9752634	11.1285219	1.740494968	6.393883407	1.61725E-10	1.91125E-07	cv Sevin Septoria tritici 13 days
TraesCS1B02G088900.2	109.9779707	2.536720041	0.635962999	3.988785581	6.64124E-05	0.005760414	cv Sevin Septoria tritici 13 days
TraesCS1B02G096300.1	26.3243216	7.292025359	1.602319366	4.55091882	5.34122E-06	0.000891135	cv Sevin Septoria tritici 13 days
TraesCS1B02G099600.1	544.7036639	1.735227913	0.448408918	3.869744431	0.00010895	0.008047226	cv Sevin Septoria tritici 13 days
TraesCS1B02G122800.1	81.23307369	4.507504875	0.968191847	4.655590611	3.23053E-06	0.000597055	cv Sevin Septoria tritici 13 days
TraesCS1B02G129300.1	240.735649	1.529979734	0.453285399	3.375312191	0.00073732	0.02831768	cv Sevin Septoria tritici 13 days
TraesCS1B02G141700.1	272.250658	2.588319124	0.715076154	3.619641222	0.000295012	0.015581786	cv Sevin Septoria tritici 13 days
TraesCS1B02G141700.2	218.3973133	2.986331421	0.721087931	4.141424772	3.45155E-05	0.003680313	cv Sevin Septoria tritici 13 days
TraesCS1B02G161300.1	78.69580914	2.359867846	0.682833603	3.455992553	0.00054827	0.023175254	cv Sevin Septoria tritici 13 days
TraesCS1B02G197000.1	29.95951505	4.655239677	0.963189732	4.833149194	1.3439E-06	0.000292085	cv Sevin Septoria tritici 13 days
TraesCS1B02G201400.1	351.6123228	1.484844288	0.344845572	4.305823849	1.66365E-05	0.002139965	cv Sevin Septoria tritici 13 days
TraesCS1B02G211800.1	156.5484466	1.608265778	0.443838604	3.62353739	0.000290601	0.015464017	cv Sevin Septoria tritici 13 days
TraesCS1B02G213400.1	145.7027569	2.217952525	0.679907949	3.26213648	0.001105759	0.036660012	cv Sevin Septoria tritici 13 days
TraesCS1B02G225300.1	52.02712321	4.084144994	0.618472635	6.603598543	4.01295E-11	6.89815E-08	cv Sevin Septoria tritici 13 days
TraesCS1B02G257100.1	80.26805372	2.092690881	0.558201481	3.748988407	0.000177549	0.011165921	cv Sevin Septoria tritici 13 days
TraesCS1B02G275000.1	48.92595013	1.933683116	0.578292735	3.343779023	0.000826455	0.030363671	cv Sevin Septoria tritici 13 days
TraesCS1B02G278600.3	18.97788355	8.706699796	2.242949911	3.881807504	0.000103683	0.037492932	cv Sevin Septoria tritici 4 days
TraesCS1B02G282600.1	9.562651833	6.471596952	2.061901307	3.13865505	0.001697251	0.048797906	cv Sevin Septoria tritici 13 days
TraesCS1B02G283300.1	83.24647906	3.394607399	0.78589086	4.319438705	1.56427E-05	0.002057172	cv Sevin Septoria tritici 13 days
TraesCS1B02G283400.1	32.57788855	3.515999567	1.025892902	3.427257915	0.00060971	0.024904606	cv Sevin Septoria tritici 13 days
TraesCS1B02G283900.1	181.4015453	1.649477475	0.52055181	3.168709521	0.001531173	0.045810835	cv Sevin Septoria tritici 13 days
TraesCS1B02G288800.1	41.71402749	3.251010965	0.968917289	3.355302873	0.000792781	0.02953392	cv Sevin Septoria tritici 13 days
TraesCS1B02G289300.1	41.87160025	2.632270151	0.753360493	3.49403795	0.000475773	0.021098782	cv Sevin Septoria tritici 13 days
TraesCS1B02G305200.1	41.28873934	2.869238295	0.735311148	3.902073703	9.53721E-05	0.007400928	cv Sevin Septoria tritici 13 days
TraesCS1B02G310100.1	39.79189561	3.023694658	0.802265061	3.768947202	0.000163938	0.010652373	cv Sevin Septoria tritici 13 days
TraesCS1B02G338500.1	281.9775436	2.759902447	0.613485806	4.498722579	6.8363E-06	0.001083229	cv Sevin Septoria tritici 13 days
TraesCS1B02G352600.1	33.44299111	3.315505835	0.758033949	4.373822356	1.2209E-05	0.001680986	cv Sevin Septoria tritici 13 days
TraesCS1B02G361500.1	107.761596	3.00687268	0.76168242	3.94767242	7.89147E-05	0.006478313	cv Sevin Septoria tritici 13 days
TraesCS1B02G364200.1	66.18270147	6.413874693	1.55149696	4.133991144	3.56517E-05	0.003738225	cv Sevin Septoria tritici 13 days
TraesCS1B02G364200.2	33.39897427	4.341843889	1.287985871	3.371033787	0.000748867	0.02856773	cv Sevin Septoria tritici 13 days
TraesCS1B02G371900.1	36.77856644	4.38528028	1.347188949	3.255133798	0.00113339	0.037357732	cv Sevin Septoria tritici 13 days
TraesCS1B02G374700.1	33.64974815	3.694955713	1.068637494	3.457632484	0.000544944	0.023069035	cv Sevin Septoria tritici 13 days
TraesCS1B02G410800.2	168.6716087	3.174356498	0.917757545	3.458818197	0.000542551	0.02300979	cv Sevin Septoria tritici 13 days
TraesCS1B02G411100.1	34.7094248	4.022846539	0.709409189	5.670699793	1.42215E-08	7.01505E-06	cv Sevin Septoria tritici 13 days
TraesCS1B02G445200.1	76.74362435	6.318740461	1.422173537	4.443016478	8.87064E-06	0.004211501	cv Sevin Septoria tritici 4 days
TraesCS1B02G465000.1	21.60393812	3.412097317	0.846671336	4.030013975	5.57735E-05	0.005152784	cv Sevin Septoria tritici 13 days
TraesCS1D02G004700.1	130.3746855	3.063300135	0.540438828	5.668171819	1.44329E-08	7.05795E-06	cv Sevin Septoria tritici 13 days
TraesCS1D02G013200.1	216.2545956	1.329352786	0.42480995	3.129288254	0.001752303	0.049551919	cv Sevin Septoria tritici 13 days
TraesCS1D02G020600.1	11.65479642	4.692182367	1.432381542	3.275790864	0.001053666	0.035662429	cv Sevin Septoria tritici 13 days
TraesCS1D02G039300.1	72.02253157	3.854020379	0.754660718	5.106957723	3.27387E-07	8.71894E-05	cv Sevin Septoria tritici 13 days
TraesCS1D02G039400.1	9.320863006	7.867190109	2.204116746	3.569316428	0.000357914	0.017593609	cv Sevin Septoria tritici 13 days
TraesCS1D02G044300.1	24.0475936	7.49023346	2.128986606	3.518215399	0.00043446	0.019939444	cv Sevin Septoria tritici 13 days
TraesCS1D02G049000.1	65.93056863	2.539043374	0.735464732	3.452297934	0.000555834	0.023390369	cv Sevin Septoria tritici 13 days
TraesCS1D02G050000.1	47.87837549	4.169723326	0.828343578	5.033808963	4.80829E-07	0.000120156	cv Sevin Septoria tritici 13 days
TraesCS1D02G052500.1	30.98914297	9.674564324	1.62409333	5.956901703	2.57065E-09	1.80028E-06	cv Sevin Septoria tritici 13 days
TraesCS1D02G072900.1	102.3794932	2.696904932	0.831588566	3.243076014	0.001182467	0.038527628	cv Sevin Septoria tritici 13 days
TraesCS1D02G080400.1	26.57346413	10.19231357	2.938124709	3.468986032	0.000522427	0.022528735	cv Sevin Septoria tritici 13 days
TraesCS1D02G083600.1	441.4751894	1.673677758	0.391198099	4.278338169	1.88294E-05	0.002347507	cv Sevin Septoria tritici 13 days
TraesCS1D02G103500.1	57.62987288	4.090757099	1.005682148	4.067644143	4.74908E-05	0.004589378	cv Sevin Septoria tritici 13 days
TraesCS1D02G123400.1	392.0546214	2.925192891	0.524578034	5.576277886	2.45719E-08	1.08052E-05	cv Sevin Septoria tritici 13 days
TraesCS1D02G156600.1	60.48222327	3.0769591	0.734323239	4.190197092	2.78712E-05	0.003130739	cv Sevin Septoria tritici 13 days
TraesCS1D02G176100.4	16.02085261	8.4623398	1.957228642	4.323633743	1.5348E-05	0.007141016	cv Sevin Septoria tritici 4 days
TraesCS1D02G187100.1	12.99376664	6.557372253	1.455019046	4.50672606	6.58355E-06	0.001057957	cv Sevin Septoria tritici 13 days
TraesCS1D02G190300.1	48.78632229	2.592540193	0.822086557	3.153609765	0.001612646	0.047251518	cv Sevin Septoria tritici 13 days
TraesCS1D02G192900.1	306.6471864	1.643427154	0.509627171	3.224763607	0.001260767	0.040133717	cv Sevin Septoria tritici 13 days
TraesCS1D02G214700.1	52.08504443	4.374242016	1.044235656	4.188941442	2.80259E-05	0.003141888	cv Sevin Septoria tritici 13 days
TraesCS1D02G239000.1	12.5987388	4.316976442	1.335416657	3.23268129	0.001226343	0.039413898	cv Sevin Septoria tritici 13 days
TraesCS1D02G245700.1	126.6163805	2.531934007	0.608178723	4.163141377	3.13899E-05	0.003430872	cv Sevin Septoria tritici 13 days
TraesCS1D02G250900.3	355.4438472	2.076171909	0.543264817	3.821657218	0.000132558	0.00926044	cv Sevin Septoria tritici 13 days
TraesCS1D02G261400.1	60.66694508	2.088964714	0.626971814	3.331831938	0.000862763	0.031212447	cv Sevin Septoria tritici 13 days
TraesCS1D02G273500.1	90.67107515	2.723850868	0.546614338	4.983131026	6.25636E-07	0.000147874	cv Sevin Septoria tritici 13 days
TraesCS1D02G276200.1	15.00572831	3.33374105	0.999508595	3.335380071	0.000851829	0.030974901	cv Sevin Septoria tritici 13 days
TraesCS1D02G278600.1	28.21517569	2.569177745	0.814050144	3.156043599	0.00159925	0.047029046	cv Sevin Septoria tritici 13 days
TraesCS1D02G285200.1	465.1623336	1.321390029	0.34836927	3.793072872	0.000148794	0.010012473	cv Sevin Septoria tritici 13 days
TraesCS1D02G310900.1	140.86492	1.766204861	0.561420414	3.145957673	0.00165544	0.047986567	cv Sevin Septoria tritici 13 days
TraesCS1D02G327000.1	158.4865165	3.313332564	0.648405459	5.109970185	3.2221E-07	8.6624E-05	cv Sevin Septoria tritici 13 days
TraesCS1D02G327000.2	635.3431224	2.396641823	0.612377391	3.913668041	9.09046E-05	0.049401061	cv Sevin Septoria tritici 10 days
TraesCS1D02G327000.2	635.3431224	3.668924385	0.611653381	5.998371787	1.99306E-09	1.46829E-06	cv Sevin Septoria tritici 13 days
TraesCS1D02G345200.1	121.1685256	1.821791284	0.563235058	3.234513296	0.001218502	0.039228588	cv Sevin Septoria tritici 13 days
TraesCS1D02G350200.1	48.19843283	2.166233225	0.674924026	3.209595658	0.001329218	0.041658136	cv Sevin Septoria tritici 13 days
TraesCS1D02G352600.2	58.15361653	4.983540379	1.415946606	3.519582135	0.000432227	0.019901395	cv Sevin Septoria tritici 13 days
TraesCS1D02G355100.1	161.0022114	2.739479151	0.800073578	3.424034022	0.000616989	0.025107113	cv Sevin Septoria tritici 13 days
TraesCS1D02G360400.1	72.9905436	2.98009636	0.748471907	3.981574101	6.84604E-05	0.005856138	cv Sevin Septoria tritici 13 days
TraesCS1D02G362900.1	72.5693931	2.554851734	0.762339759	3.351329511	0.000804245	0.029818056	cv Sevin Septoria tritici 13 days
TraesCS1D02G363300.1	104.1239841	2.703936154	0.604374652	4.473940369	7.67912E-06	0.001188909	cv Sevin Septoria tritici 13 days
TraesCS1D02G392300.1	126.6467539	2.967359304	0.815275668	3.63970056	0.000272955	0.014902465	cv Sevin Septoria tritici 13 days
TraesCS1D02G412200.1	1272.725645	2.321271622	0.598863623	3.876127276	0.000106132	0.007890504	cv Sevin Septoria tritici 13 days
TraesCS1D02G422000.1	21.83682938	3.809362585	1.025715563	3.71385862	0.000204123	0.012191978	cv Sevin Septoria tritici 13 days
TraesCS1D02G441600.1	74.33095797	3.078098547	0.727001985	4.233961679	2.2961E-05	0.002695308	cv Sevin Septoria tritici 13 days
TraesCS2A02G026500.1	23.66566069	9.910471235	1.788533738	5.541115062	3.00552E-08	1.24446E-05	cv Sevin Septoria tritici 13 days
TraesCS2A02G027300.1	16.34923438	9.480135709	2.633672543	3.599587859	0.000318722	0.016229641	cv Sevin Septoria tritici 13 days
TraesCS2A02G027600.1	30.22778944	6.511911345	2.061171201	3.159325796	0.001581346	0.046774032	cv Sevin Septoria tritici 13 days
TraesCS2A02G027700.1	151.2322253	5.7083609	1.444618523	3.951465947	7.76739E-05	0.006419481	cv Sevin Septoria tritici 13 days
TraesCS2A02G035700.1	10.73588361	3.884546854	1.192979391	3.256172641	0.001129251	0.037264615	cv Sevin Septoria tritici 13 days
TraesCS2A02G040100.1	118.6944888	22.3881408	4.081266475	5.485586629	4.121E-08	6.84782E-05	cv Sevin Septoria tritici 4 days
TraesCS2A02G040100.1	118.6944888	23.52438181	5.202025316	4.52215827	6.12123E-06	0.010795835	cv Sevin Septoria tritici 10 days
TraesCS2A02G040100.1	118.6944888	23.0673008	5.202250045	4.434100745	9.24574E-06	0.00135874	cv Sevin Septoria tritici 13 days
TraesCS2A02G068200.1	32.55734755	2.290137017	0.681176343	3.362032519	0.00077371	0.029123742	cv Sevin Septoria tritici 13 days
TraesCS2A02G079500.1	34.64807129	2.484994417	0.766662274	3.241315637	0.001189794	0.038655347	cv Sevin Septoria tritici 13 days
TraesCS2A02G083600.1	108.98604	3.764130557	1.080231673	3.484558592	0.00049295	0.021643231	cv Sevin Septoria tritici 13 days
TraesCS2A02G083700.1	28.52489363	7.153770871	1.121949062	6.37619934	1.81537E-10	2.1016E-07	cv Sevin Septoria tritici 13 days
TraesCS2A02G094000.1	338.9544964	1.629436406	0.499886559	3.259612359	0.001115646	0.03692306	cv Sevin Septoria tritici 13 days
TraesCS2A02G101400.1	161.8090134	2.729091822	0.848582058	3.216061188	0.001299631	0.041002713	cv Sevin Septoria tritici 13 days
TraesCS2A02G101900.1	257.6253499	4.360128667	1.143219455	3.813903489	0.000136789	0.009493245	cv Sevin Septoria tritici 13 days
TraesCS2A02G102100.2	91.86973828	2.337436384	0.637990066	3.663750437	0.000248549	0.013945785	cv Sevin Septoria tritici 13 days
TraesCS2A02G106900.1	15.29572457	5.864708944	1.667491146	3.517085508	0.000436313	0.019992167	cv Sevin Septoria tritici 13 days
TraesCS2A02G126500.1	14.39223761	3.751980392	1.168240251	3.211651361	0.001319744	0.041432781	cv Sevin Septoria tritici 13 days
TraesCS2A02G145800.1	23.09385095	3.734230475	1.175064863	3.177893063	0.001483495	0.044954182	cv Sevin Septoria tritici 13 days
TraesCS2A02G177200.1	188.9359466	1.953663404	0.517775065	3.773189432	0.000161174	0.010561381	cv Sevin Septoria tritici 13 days
TraesCS2A02G186700.1	17.11013842	7.93450541	2.262225971	3.507388524	0.000452528	0.02048691	cv Sevin Septoria tritici 13 days
TraesCS2A02G188000.1	56.25489039	2.374197916	0.626348185	3.790540104	0.00015032	0.010079262	cv Sevin Septoria tritici 13 days
TraesCS2A02G196400.1	10.87083011	6.229685839	1.858357993	3.352252829	0.000801568	0.029777168	cv Sevin Septoria tritici 13 days
TraesCS2A02G196700.1	42.93583981	4.481097526	1.092938518	4.100045383	4.13069E-05	0.004141956	cv Sevin Septoria tritici 13 days
TraesCS2A02G199700.1	162.9351139	2.213493731	0.593542686	3.729291562	0.000192019	0.011762918	cv Sevin Septoria tritici 13 days
TraesCS2A02G212100.1	54.72481778	23.55858862	4.081063646	5.772658959	7.80303E-09	1.78513E-05	cv Sevin Septoria tritici 4 days
TraesCS2A02G212900.1	31.37661954	4.417861791	0.965501891	4.575715317	4.74596E-06	0.000810901	cv Sevin Septoria tritici 13 days
TraesCS2A02G219100.1	91.45007864	5.103357525	1.074085833	4.751349815	2.02063E-06	0.007446755	cv Sevin Septoria tritici 10 days
TraesCS2A02G219100.1	91.45007864	5.489533358	1.073586518	5.113265924	3.16636E-07	8.55309E-05	cv Sevin Septoria tritici 13 days
TraesCS2A02G220400.1	161.228115	3.805855919	1.005661057	3.784432035	0.00015406	0.010281421	cv Sevin Septoria tritici 13 days
TraesCS2A02G274700.1	346.7809276	2.889823853	0.627277969	4.606927068	4.08663E-06	0.000722175	cv Sevin Septoria tritici 13 days
TraesCS2A02G276600.1	11.4325645	8.204214267	2.556514831	3.209140102	0.001331326	0.041678146	cv Sevin Septoria tritici 13 days
TraesCS2A02G284700.1	340.0016569	1.577139335	0.42372034	3.722123265	0.000197555	0.011998371	cv Sevin Septoria tritici 13 days
TraesCS2A02G286700.1	22.22268423	7.831480588	1.769936344	4.424724434	9.65655E-06	0.001408168	cv Sevin Septoria tritici 13 days
TraesCS2A02G291900.1	18.30670032	8.923035063	2.511707506	3.552577297	0.000381477	0.01840863	cv Sevin Septoria tritici 13 days
TraesCS2A02G315600.1	95.78575537	2.951668172	0.921559493	3.202905722	0.001360485	0.042241313	cv Sevin Septoria tritici 13 days
TraesCS2A02G318600.1	88.76376432	3.182246427	0.952147833	3.342176831	0.000831241	0.03049998	cv Sevin Septoria tritici 13 days
TraesCS2A02G343200.2	288.7468737	1.602237721	0.401274105	3.992875941	6.52767E-05	0.00569675	cv Sevin Septoria tritici 13 days
TraesCS2A02G355700.1	43.70627248	10.9066679	1.851130859	5.891894593	3.81793E-09	2.51832E-06	cv Sevin Septoria tritici 13 days
TraesCS2A02G380900.1	118.6865958	2.828448021	0.702459436	4.026493029	5.66149E-05	0.005188268	cv Sevin Septoria tritici 13 days
TraesCS2A02G381000.1	29.77539115	3.686204911	0.852106571	4.325990478	1.51848E-05	0.002007862	cv Sevin Septoria tritici 13 days
TraesCS2A02G384100.1	46.4356471	3.318119608	0.829737492	3.998999251	6.36109E-05	0.005577111	cv Sevin Septoria tritici 13 days
TraesCS2A02G384400.1	81.17306293	2.061508095	0.614353495	3.355573155	0.000792007	0.02953392	cv Sevin Septoria tritici 13 days
TraesCS2A02G395000.1	888.878542	3.055335412	0.935190557	3.267072565	0.001086658	0.036262232	cv Sevin Septoria tritici 13 days
TraesCS2A02G396400.1	42.49074146	6.323960496	1.211256921	5.220990186	1.77969E-07	5.25806E-05	cv Sevin Septoria tritici 13 days
TraesCS2A02G407100.1	93.33748504	2.195781452	0.665690346	3.298502773	0.000972019	0.033848227	cv Sevin Septoria tritici 13 days
TraesCS2A02G427700.1	21.76876876	2.771480383	0.783432057	3.537614219	0.00040376	0.018897411	cv Sevin Septoria tritici 13 days
TraesCS2A02G443600.1	32.32461208	8.4183001	1.466568346	5.740134869	9.46012E-09	5.06259E-06	cv Sevin Septoria tritici 13 days
TraesCS2A02G447800.1	69.92167408	1.946342274	0.519259421	3.748304208	0.000178034	0.011171648	cv Sevin Septoria tritici 13 days
TraesCS2A02G451300.1	369.568131	3.20778386	0.423981188	7.565863653	3.85296E-14	1.45709E-10	cv Sevin Septoria tritici 13 days
TraesCS2A02G462700.1	46.94014621	2.89380318	0.675685332	4.282767497	1.84583E-05	0.002321653	cv Sevin Septoria tritici 13 days
TraesCS2A02G464300.2	93.6948844	24.05030235	4.080821423	5.893495416	3.78111E-09	1.46604E-05	cv Sevin Septoria tritici 4 days
TraesCS2A02G464300.2	93.6948844	19.66263529	5.212067663	3.772521111	0.000161606	0.010561381	cv Sevin Septoria tritici 13 days
TraesCS2A02G467300.1	264.9859089	1.515939005	0.469576594	3.228310408	0.001245238	0.039782326	cv Sevin Septoria tritici 13 days
TraesCS2A02G468300.1	912.920297	1.62469814	0.497181674	3.267815822	0.001083809	0.036239421	cv Sevin Septoria tritici 13 days
TraesCS2A02G502400.2	2439.632751	1.037641418	0.331543776	3.129726732	0.00174969	0.049551919	cv Sevin Septoria tritici 13 days
TraesCS2A02G507500.1	180.0548402	3.074385633	0.626004966	4.911120202	9.05576E-07	0.000205479	cv Sevin Septoria tritici 13 days
TraesCS2A02G512100.1	3082.476872	2.807481146	0.547462824	5.128167653	2.92576E-07	8.05663E-05	cv Sevin Septoria tritici 13 days
TraesCS2A02G516500.1	26.34339085	10.17976765	2.950583609	3.450086151	0.000560408	0.023490874	cv Sevin Septoria tritici 13 days
TraesCS2A02G516700.1	20.00107318	9.76685271	2.453201053	3.981268758	6.85484E-05	0.005856138	cv Sevin Septoria tritici 13 days
TraesCS2A02G541800.1	65.90233203	9.459021982	1.343095295	7.042703536	1.88545E-12	4.45642E-09	cv Sevin Septoria tritici 13 days
TraesCS2A02G541900.1	34.62475795	10.55978488	1.734595317	6.08775129	1.14508E-09	9.55229E-07	cv Sevin Septoria tritici 13 days
TraesCS2A02G548200.1	143.7297703	2.144601563	0.545992533	3.927895405	8.56925E-05	0.006883226	cv Sevin Septoria tritici 13 days
TraesCS2A02G583500.1	75.00623129	3.60389871	0.799553417	4.507389541	6.56301E-06	0.001057651	cv Sevin Septoria tritici 13 days
TraesCS2A02G583900.1	41.41789171	2.851678023	0.773513976	3.686653518	0.000227222	0.013204967	cv Sevin Septoria tritici 13 days
TraesCS2A02G584328.1	27.33164963	5.522966335	1.104778911	4.999159813	5.75807E-07	0.00013724	cv Sevin Septoria tritici 13 days
TraesCS2A02G593300.1	10.42029602	5.631651607	1.736068028	3.243911827	0.001179002	0.038481242	cv Sevin Septoria tritici 13 days
TraesCS2B02G043600.1	56.97696227	2.458071395	0.720553478	3.411365667	0.000646383	0.025983907	cv Sevin Septoria tritici 13 days
TraesCS2B02G060900.1	29.09814213	2.7801425	0.72479683	3.83575422	0.00012518	0.008880836	cv Sevin Septoria tritici 13 days
TraesCS2B02G062500.1	113.215246	3.730229262	0.865403999	4.310390597	1.62966E-05	0.002115588	cv Sevin Septoria tritici 13 days
TraesCS2B02G097800.1	116.9604844	3.592779621	0.831834775	4.319102456	1.56665E-05	0.002057172	cv Sevin Septoria tritici 13 days
TraesCS2B02G097900.1	53.58829486	9.7477588	1.482324372	6.57599577	4.83286E-11	7.75908E-08	cv Sevin Septoria tritici 13 days
TraesCS2B02G123400.1	34.86955945	5.520070728	1.300454832	4.244723148	2.18863E-05	0.002608246	cv Sevin Septoria tritici 13 days
TraesCS2B02G137300.1	58.72592474	23.43464937	4.081022568	5.742347408	9.3373E-09	1.94978E-05	cv Sevin Septoria tritici 4 days
TraesCS2B02G137900.1	64.802146	2.092325675	0.623597833	3.355248471	0.000792937	0.02953392	cv Sevin Septoria tritici 13 days
TraesCS2B02G183300.1	158.9531285	1.778170079	0.493781029	3.601130812	0.000316836	0.016191752	cv Sevin Septoria tritici 13 days
TraesCS2B02G208900.1	11.7079908	4.621001555	1.47751745	3.127544486	0.001762731	0.049658214	cv Sevin Septoria tritici 13 days
TraesCS2B02G218600.1	166.6405147	2.000685131	0.603794006	3.313522674	0.000921286	0.032601928	cv Sevin Septoria tritici 13 days
TraesCS2B02G219200.1	184.8027703	2.236072138	0.480353707	4.655053361	3.23897E-06	0.000597055	cv Sevin Septoria tritici 13 days
TraesCS2B02G221600.3	116.2614769	24.07044043	4.080796801	5.898465815	3.66897E-09	1.46604E-05	cv Sevin Septoria tritici 4 days
TraesCS2B02G221600.3	116.2614769	22.62547303	5.202738748	4.34876209	1.36908E-05	0.016508538	cv Sevin Septoria tritici 10 days
TraesCS2B02G224300.1	42.98053777	4.234798051	1.027398574	4.121864831	3.75818E-05	0.003855088	cv Sevin Septoria tritici 13 days
TraesCS2B02G227000.1	154.2693781	1.826064067	0.414828033	4.40197846	1.07268E-05	0.001528868	cv Sevin Septoria tritici 13 days
TraesCS2B02G228800.1	15.8674053	9.43861004	2.714112724	3.477604285	0.000505916	0.021991266	cv Sevin Septoria tritici 13 days
TraesCS2B02G244600.1	48.37176241	6.49464554	1.151446989	5.640420792	1.69635E-08	0.000210185	cv Sevin Septoria tritici 10 days
TraesCS2B02G244600.1	48.37176241	6.655927311	1.151261558	5.781420621	7.40724E-09	4.11944E-06	cv Sevin Septoria tritici 13 days
TraesCS2B02G271700.1	110.9285104	3.081289629	0.849197326	3.628473069	0.000285102	0.015275345	cv Sevin Septoria tritici 13 days
TraesCS2B02G305900.1	135.9572798	2.927108916	0.777899195	3.76283834	0.000167996	0.010780237	cv Sevin Septoria tritici 13 days
TraesCS2B02G306600.1	25.46918679	2.685628365	0.763526346	3.517401041	0.000435795	0.019984557	cv Sevin Septoria tritici 13 days
TraesCS2B02G308400.1	22.23773136	4.506848691	1.379874988	3.266128257	0.001090289	0.036295604	cv Sevin Septoria tritici 13 days
TraesCS2B02G314500.1	16.87141555	3.119417776	0.991796855	3.145218458	0.001659629	0.048032697	cv Sevin Septoria tritici 13 days
TraesCS2B02G336900.1	48.96810058	5.014304947	1.214117834	4.129998593	3.62765E-05	0.003780455	cv Sevin Septoria tritici 13 days
TraesCS2B02G351300.1	70.65347884	2.563491178	0.767754513	3.338946414	0.000840968	0.030678675	cv Sevin Septoria tritici 13 days
TraesCS2B02G364000.1	59.26975132	5.932869669	1.427235328	4.15689659	3.226E-05	0.003505709	cv Sevin Septoria tritici 13 days
TraesCS2B02G369100.1	301.5733565	2.51711466	0.615170818	4.091732873	4.28162E-05	0.004223983	cv Sevin Septoria tritici 13 days
TraesCS2B02G372600.1	41.77417514	10.11912223	1.842676086	5.491536091	3.98453E-08	1.54183E-05	cv Sevin Septoria tritici 13 days
TraesCS2B02G388200.1	27.80817926	2.86316947	0.765515039	3.740187096	0.000183883	0.011450017	cv Sevin Septoria tritici 13 days
TraesCS2B02G394500.1	17.84101045	4.906766793	1.212327419	4.04739406	5.1791E-05	0.004860703	cv Sevin Septoria tritici 13 days
TraesCS2B02G395000.1	29.18990253	6.733795538	2.04685805	3.289820483	0.001002513	0.034528575	cv Sevin Septoria tritici 13 days
TraesCS2B02G398200.1	51.34369441	3.225113196	0.84875535	3.799814867	0.000144804	0.009790422	cv Sevin Septoria tritici 13 days
TraesCS2B02G401300.1	42.66914866	3.843002054	0.905561249	4.243779266	2.19787E-05	0.002613755	cv Sevin Septoria tritici 13 days
TraesCS2B02G413000.1	774.3724232	3.151622621	0.875926165	3.598045987	0.000320617	0.016257442	cv Sevin Septoria tritici 13 days
TraesCS2B02G414800.1	41.26634689	5.491675857	1.036916414	5.296160601	1.18263E-07	3.76886E-05	cv Sevin Septoria tritici 13 days
TraesCS2B02G419100.1	50.53001587	2.338575647	0.739019608	3.164429771	0.001553872	0.046241881	cv Sevin Septoria tritici 13 days
TraesCS2B02G445400.1	11.3640246	4.761338859	1.298363211	3.667185592	0.000245235	0.01382822	cv Sevin Septoria tritici 13 days
TraesCS2B02G445600.1	133.7404843	4.543657132	1.172209156	3.876148817	0.000106123	0.007890504	cv Sevin Septoria tritici 13 days
TraesCS2B02G448100.1	32.69539671	2.736170631	0.769298029	3.556710832	0.000375527	0.018191419	cv Sevin Septoria tritici 13 days
TraesCS2B02G451400.1	15.36391075	3.233836016	1.008031017	3.208071936	0.001336281	0.041730297	cv Sevin Septoria tritici 13 days
TraesCS2B02G452400.2	50.51527493	3.40553477	0.854214666	3.986743501	6.69864E-05	0.005774877	cv Sevin Septoria tritici 13 days
TraesCS2B02G472800.1	65.9173135	3.31697447	0.625764126	5.300678533	1.15373E-07	3.71855E-05	cv Sevin Septoria tritici 13 days
TraesCS2B02G533000.1	23.01022332	9.226605164	1.742045018	5.296421773	1.18094E-07	3.76886E-05	cv Sevin Septoria tritici 13 days
TraesCS2B02G533400.3	34.27351267	2.312943443	0.732835728	3.156155405	0.001598637	0.047029046	cv Sevin Septoria tritici 13 days
TraesCS2B02G540100.1	203.6327292	25.16574636	4.080625005	6.167130361	6.95404E-10	8.08883E-06	cv Sevin Septoria tritici 4 days
TraesCS2B02G540100.1	203.6327292	19.78541978	5.211067972	3.796807081	0.000146572	0.009886361	cv Sevin Septoria tritici 13 days
TraesCS2B02G545200.1	25.01778389	8.605872202	1.527137063	5.635297847	1.74756E-08	8.19274E-06	cv Sevin Septoria tritici 13 days
TraesCS2B02G560500.1	26.68850077	10.19854586	2.931947366	3.478420513	0.000504378	0.021974921	cv Sevin Septoria tritici 13 days
TraesCS2B02G563800.1	233.422541	2.46076694	0.73975697	3.326453199	0.000879588	0.031639507	cv Sevin Septoria tritici 13 days
TraesCS2B02G572100.1	33.59892241	9.799186123	1.753955429	5.586907147	2.31149E-08	1.02439E-05	cv Sevin Septoria tritici 13 days
TraesCS2B02G574500.1	13.33229808	8.347193789	1.812700627	4.604838583	4.12786E-06	0.000727195	cv Sevin Septoria tritici 13 days
TraesCS2B02G602449.1	62.49703328	4.843179838	0.981228234	4.935834162	7.98089E-07	0.000183289	cv Sevin Septoria tritici 13 days
TraesCS2B02G603100.1	26.11934706	4.929945691	1.435562582	3.434155887	0.000594402	0.024521426	cv Sevin Septoria tritici 13 days
TraesCS2B02G603200.1	38.07592261	6.282254275	1.33446614	4.707691028	2.50538E-06	0.000488386	cv Sevin Septoria tritici 13 days
TraesCS2B02G627900.1	128.6470884	2.672036583	0.837387715	3.190919253	0.001418209	0.043573448	cv Sevin Septoria tritici 13 days
TraesCS2D02G011700.1	32.29108262	4.174228777	1.299474018	3.212244892	0.001317021	0.041390199	cv Sevin Septoria tritici 13 days
TraesCS2D02G021500.1	140.8458305	3.526005459	1.108589689	3.180622635	0.001469589	0.044723132	cv Sevin Septoria tritici 13 days
TraesCS2D02G029300.1	10.89272234	6.336160737	1.873854801	3.381350963	0.000721303	0.028063554	cv Sevin Septoria tritici 13 days
TraesCS2D02G029500.1	40.05064084	6.632889033	1.544722186	4.293904167	1.75558E-05	0.002232897	cv Sevin Septoria tritici 13 days
TraesCS2D02G047500.1	70.7111033	4.023776151	1.033198471	3.894485198	9.84075E-05	0.00753342	cv Sevin Septoria tritici 13 days
TraesCS2D02G053300.1	299.0513206	2.477045195	0.459350781	5.392491525	6.94874E-08	2.43317E-05	cv Sevin Septoria tritici 13 days
TraesCS2D02G066300.1	33.91605825	2.446034809	0.650021646	3.76300516	0.000167884	0.010780237	cv Sevin Septoria tritici 13 days
TraesCS2D02G081500.2	12.48078148	9.041042534	2.233812434	4.047359749	5.17986E-05	0.004860703	cv Sevin Septoria tritici 13 days
TraesCS2D02G084300.1	149.6270845	1.661068591	0.497385586	3.339599377	0.000838993	0.030645674	cv Sevin Septoria tritici 13 days
TraesCS2D02G104600.1	47.01532979	4.283331356	0.932234029	4.594695348	4.33382E-06	0.000756432	cv Sevin Septoria tritici 13 days
TraesCS2D02G106400.1	92.8476841	4.458677173	0.765388444	5.82537822	5.69834E-09	3.36713E-06	cv Sevin Septoria tritici 13 days
TraesCS2D02G117100.1	53.57890316	1.878274633	0.543085243	3.458526371	0.000543139	0.02300979	cv Sevin Septoria tritici 13 days
TraesCS2D02G129100.1	62.65890532	3.167028976	0.929405233	3.407586772	0.000655401	0.026163447	cv Sevin Septoria tritici 13 days
TraesCS2D02G137300.1	45.99829655	2.210399865	0.660958346	3.344234746	0.000825099	0.030334972	cv Sevin Septoria tritici 13 days
TraesCS2D02G157600.1	23.93166255	3.815293667	0.946082683	4.032727516	5.51332E-05	0.005112832	cv Sevin Septoria tritici 13 days
TraesCS2D02G163300.1	160.4145527	4.986516482	1.516648185	3.287853129	0.001009545	0.034644552	cv Sevin Septoria tritici 13 days
TraesCS2D02G163900.2	162.4902363	1.830165808	0.553518364	3.306422924	0.000944953	0.033190977	cv Sevin Septoria tritici 13 days
TraesCS2D02G185400.2	138.1066554	2.839419819	0.708525996	4.007502664	6.13642E-05	0.005445201	cv Sevin Septoria tritici 13 days
TraesCS2D02G199600.2	103.3967956	2.074206401	0.585699369	3.541418192	0.000397982	0.018750782	cv Sevin Septoria tritici 13 days
TraesCS2D02G204400.1	78.01103575	5.111064479	1.420235258	3.598744962	0.000319757	0.016253147	cv Sevin Septoria tritici 13 days
TraesCS2D02G204700.1	56.05910704	4.694318496	0.898482708	5.224717685	1.74421E-07	5.18021E-05	cv Sevin Septoria tritici 13 days
TraesCS2D02G207400.1	142.2008709	1.875431311	0.416562455	4.502161172	6.72659E-06	0.001072087	cv Sevin Septoria tritici 13 days
TraesCS2D02G218700.1	33.86144245	5.564497965	1.432385977	3.884775509	0.000102424	0.007686687	cv Sevin Septoria tritici 13 days
TraesCS2D02G224200.1	38.39961369	5.895886347	1.682349038	3.504555958	0.000457369	0.020656639	cv Sevin Septoria tritici 13 days
TraesCS2D02G238600.4	49.56209912	23.68598246	4.081126147	5.803785919	6.4834E-09	1.65492E-05	cv Sevin Septoria tritici 4 days
TraesCS2D02G252600.1	187.7380396	3.405485708	0.758474294	4.489915789	7.12513E-06	0.00111652	cv Sevin Septoria tritici 13 days
TraesCS2D02G283400.1	530.0925607	1.621176114	0.480104225	3.376717031	0.000733565	0.028288371	cv Sevin Septoria tritici 13 days
TraesCS2D02G285300.1	23.7205944	7.944667817	1.735163892	4.578626752	4.68039E-06	0.000806989	cv Sevin Septoria tritici 13 days
TraesCS2D02G287300.1	149.3297963	3.025156273	0.965395874	3.133591467	0.001726811	0.049273177	cv Sevin Septoria tritici 13 days
TraesCS2D02G313400.1	100.4396468	2.023610502	0.55841119	3.623871688	0.000290226	0.015458534	cv Sevin Septoria tritici 13 days
TraesCS2D02G316300.1	56.41769193	5.129797903	1.084216196	4.731342258	2.2304E-06	0.000443936	cv Sevin Septoria tritici 13 days
TraesCS2D02G321500.1	291.2308361	2.283786664	0.446110831	5.119325747	3.0663E-07	8.40285E-05	cv Sevin Septoria tritici 13 days
TraesCS2D02G322200.1	155.7609985	2.339128137	0.732699797	3.19247821	0.001410576	0.043416347	cv Sevin Septoria tritici 13 days
TraesCS2D02G326400.1	52.96356643	3.051992626	0.767705364	3.975473883	7.02393E-05	0.005946853	cv Sevin Septoria tritici 13 days
TraesCS2D02G329900.1	32.45051181	3.491908473	0.93615721	3.73004495	0.000191446	0.011750357	cv Sevin Septoria tritici 13 days
TraesCS2D02G352600.1	32.46260232	8.439360368	1.471372608	5.735705775	9.71071E-09	5.14813E-06	cv Sevin Septoria tritici 13 days
TraesCS2D02G377400.1	80.4339539	3.059121971	0.657186701	4.654875036	3.24177E-06	0.000597055	cv Sevin Septoria tritici 13 days
TraesCS2D02G378400.1	85.16828281	2.728885324	0.77151028	3.537069295	0.000404593	0.018920833	cv Sevin Septoria tritici 13 days
TraesCS2D02G379000.1	80.8605461	2.124375526	0.532815276	3.98707699	6.68923E-05	0.005774877	cv Sevin Septoria tritici 13 days
TraesCS2D02G380500.1	34.57805858	3.183790784	0.85413139	3.727518763	0.000193374	0.011807689	cv Sevin Septoria tritici 13 days
TraesCS2D02G387900.2	96.67959255	1.862843808	0.535324324	3.479841516	0.00050171	0.021875502	cv Sevin Septoria tritici 13 days
TraesCS2D02G394200.1	40.34048911	2.988990925	0.829503354	3.603350019	0.000314142	0.016141324	cv Sevin Septoria tritici 13 days
TraesCS2D02G396700.1	558.7146002	2.90816584	0.890288543	3.266543036	0.001088693	0.036263756	cv Sevin Septoria tritici 13 days
TraesCS2D02G407700.1	276.2471929	1.425195656	0.40709465	3.500895073	0.000463698	0.020909184	cv Sevin Septoria tritici 13 days
TraesCS2D02G418600.1	126.1013164	4.282607959	0.961817304	4.452621032	8.48284E-06	0.001269651	cv Sevin Septoria tritici 13 days
TraesCS2D02G436200.1	78.9552952	3.90344322	1.024080219	3.811657668	0.000138038	0.009534775	cv Sevin Septoria tritici 13 days
TraesCS2D02G436700.1	68.25284445	2.793081248	0.827499915	3.375325118	0.000737285	0.02831768	cv Sevin Septoria tritici 13 days
TraesCS2D02G442700.1	26.09036397	10.1479528	2.200866361	4.610890048	4.00949E-06	0.000715227	cv Sevin Septoria tritici 13 days
TraesCS2D02G443500.1	239.9407059	1.45809541	0.427746857	3.408781118	0.000652538	0.02608589	cv Sevin Septoria tritici 13 days
TraesCS2D02G446700.1	61.19606216	2.243266126	0.556918201	4.027999305	5.62535E-05	0.005178387	cv Sevin Septoria tritici 13 days
TraesCS2D02G451100.1	337.9891997	3.112687619	0.583852207	5.331293746	9.75155E-08	3.25392E-05	cv Sevin Septoria tritici 13 days
TraesCS2D02G491000.1	28.17488718	5.256726653	1.193841573	4.403202881	1.06664E-05	0.001524091	cv Sevin Septoria tritici 13 days
TraesCS2D02G507900.1	30.32686423	3.222021824	0.907835964	3.549123357	0.000386516	0.018525438	cv Sevin Septoria tritici 13 days
TraesCS2D02G513600.1	2628.526917	2.659748534	0.464254465	5.729074753	1.0098E-08	5.25522E-06	cv Sevin Septoria tritici 13 days
TraesCS2D02G518300.1	27.75373623	9.520143898	1.817930348	5.236803438	1.63382E-07	4.9416E-05	cv Sevin Septoria tritici 13 days
TraesCS2D02G531000.1	12.98502858	4.145408238	1.293656979	3.20441068	0.001353393	0.042090218	cv Sevin Septoria tritici 13 days
TraesCS2D02G534600.1	186.4720868	2.172368623	0.527698248	4.116687204	3.84357E-05	0.003914371	cv Sevin Septoria tritici 13 days
TraesCS2D02G540000.1	52.63317284	2.969617182	0.896614959	3.312031717	0.00092621	0.032690792	cv Sevin Septoria tritici 13 days
TraesCS2D02G543000.1	33.25196945	10.5055239	1.758489163	5.974176086	2.31256E-09	1.63978E-06	cv Sevin Septoria tritici 13 days
TraesCS2D02G543500.1	88.4912396	11.19103367	1.361375489	8.220387218	2.02847E-16	2.87668E-12	cv Sevin Septoria tritici 13 days
TraesCS2D02G543600.1	20.84932376	8.368493835	1.985632704	4.214522564	2.50307E-05	0.002880106	cv Sevin Septoria tritici 13 days
TraesCS2D02G549300.1	155.372412	2.050447394	0.533268252	3.845058068	0.000120524	0.008649822	cv Sevin Septoria tritici 13 days
TraesCS2D02G561400.1	25.89633714	6.833260365	1.448404371	4.717784964	2.38426E-06	0.00046904	cv Sevin Septoria tritici 13 days
TraesCS2D02G596400.1	35.09801079	4.963746896	1.389248841	3.572971774	0.000352953	0.017410088	cv Sevin Septoria tritici 13 days
TraesCS3A02G000100.1	27.6087939	10.24745804	2.883740127	3.553530343	0.000380097	0.01836576	cv Sevin Septoria tritici 13 days
TraesCS3A02G012500.1	38.07712826	10.71127643	2.457623656	4.358387587	1.31024E-05	0.001783748	cv Sevin Septoria tritici 13 days
TraesCS3A02G015500.1	255.7428493	1.685326053	0.488804009	3.447856442	0.000565054	0.023620685	cv Sevin Septoria tritici 13 days
TraesCS3A02G046500.1	54.72114332	7.971114502	1.366378586	5.833752508	5.41945E-09	3.27046E-06	cv Sevin Septoria tritici 13 days
TraesCS3A02G057100.1	15.66086507	7.972420028	2.152769664	3.703331649	0.000212786	0.01254732	cv Sevin Septoria tritici 13 days
TraesCS3A02G077000.2	162.2133838	1.947936495	0.564059674	3.453422725	0.000553521	0.023327656	cv Sevin Septoria tritici 13 days
TraesCS3A02G090100.1	257.2076362	1.444064038	0.453594478	3.18360145	0.001454551	0.044456292	cv Sevin Septoria tritici 13 days
TraesCS3A02G109300.1	56.38085765	2.40402457	0.630685132	3.81176668	0.000137977	0.009534775	cv Sevin Septoria tritici 13 days
TraesCS3A02G122200.2	18.71365282	8.194573471	1.596464772	5.132949763	2.85236E-07	0.000343223	cv Sevin Septoria tritici 4 days
TraesCS3A02G122200.2	18.71365282	7.89520311	1.888025963	4.181723804	2.89307E-05	0.003217891	cv Sevin Septoria tritici 13 days
TraesCS3A02G122400.1	288.3021868	1.6746262	0.39952569	4.191535713	2.77073E-05	0.003124695	cv Sevin Septoria tritici 13 days
TraesCS3A02G138200.1	35.24215377	4.964761279	1.378617674	3.60126043	0.000316678	0.016191752	cv Sevin Septoria tritici 13 days
TraesCS3A02G138300.1	54.18509235	4.905724428	0.842054964	5.825895743	5.68071E-09	3.36713E-06	cv Sevin Septoria tritici 13 days
TraesCS3A02G138400.1	57.40836346	8.214379967	1.108177676	7.412511682	1.2393E-13	4.13531E-10	cv Sevin Septoria tritici 13 days
TraesCS3A02G151900.1	221.6154924	1.753508934	0.535244287	3.27609089	0.001052547	0.035645833	cv Sevin Septoria tritici 13 days
TraesCS3A02G167200.1	138.7156645	2.537127531	0.665041368	3.814992049	0.000136187	0.009482301	cv Sevin Septoria tritici 13 days
TraesCS3A02G215000.1	69.40960609	2.025941691	0.626192371	3.235334359	0.001215004	0.039182657	cv Sevin Septoria tritici 13 days
TraesCS3A02G227800.1	29.1506949	5.967880323	1.005834447	5.933263015	2.96973E-09	2.0544E-06	cv Sevin Septoria tritici 13 days
TraesCS3A02G246200.1	37.11010823	3.251598374	0.942508076	3.449942189	0.000560707	0.023490874	cv Sevin Septoria tritici 13 days
TraesCS3A02G247000.1	38.57311166	3.264780915	0.866697275	3.766921865	0.000165273	0.010714582	cv Sevin Septoria tritici 13 days
TraesCS3A02G252800.1	104.1312052	1.792540634	0.492946911	3.636376647	0.0002765	0.015004494	cv Sevin Septoria tritici 13 days
TraesCS3A02G260100.1	34.52187321	4.846533619	1.133310652	4.276438777	1.89907E-05	0.002362423	cv Sevin Septoria tritici 13 days
TraesCS3A02G260200.1	13.85258214	5.98681472	1.404859604	4.261503927	2.03056E-05	0.002494899	cv Sevin Septoria tritici 13 days
TraesCS3A02G262100.2	103.5362511	1.540153608	0.48869995	3.151532158	0.001624163	0.04736877	cv Sevin Septoria tritici 13 days
TraesCS3A02G266800.2	75.29291718	2.855295053	0.890189526	3.207513647	0.001338877	0.041730297	cv Sevin Septoria tritici 13 days
TraesCS3A02G277700.1	43.48480642	2.585509137	0.650506467	3.97460943	7.04948E-05	0.005953381	cv Sevin Septoria tritici 13 days
TraesCS3A02G294000.1	19.54016491	4.75857037	1.047490841	4.542827664	5.55046E-06	0.010420069	cv Sevin Septoria tritici 10 days
TraesCS3A02G294000.1	19.54016491	4.402670983	1.051817861	4.185773171	2.84197E-05	0.003179756	cv Sevin Septoria tritici 13 days
TraesCS3A02G297100.1	18.59800531	8.895397288	1.896150779	4.691292163	2.71485E-06	0.000520279	cv Sevin Septoria tritici 13 days
TraesCS3A02G297200.1	115.6571584	5.027941228	1.220657962	4.11904185	3.80451E-05	0.003888553	cv Sevin Septoria tritici 13 days
TraesCS3A02G305400.1	379.2224337	2.24987844	0.517101104	4.350944956	1.35552E-05	0.001826444	cv Sevin Septoria tritici 13 days
TraesCS3A02G315800.2	25.88241242	3.243541256	0.840781383	3.85777007	0.000114426	0.008311065	cv Sevin Septoria tritici 13 days
TraesCS3A02G326900.1	17.30295519	3.219583381	1.024836129	3.14155921	0.001680508	0.048371969	cv Sevin Septoria tritici 13 days
TraesCS3A02G327300.1	37.14431678	3.766169833	0.860192239	4.378288553	1.19615E-05	0.001658992	cv Sevin Septoria tritici 13 days
TraesCS3A02G344400.2	85.64098312	3.170762427	0.929291979	3.412019578	0.000644835	0.025942482	cv Sevin Septoria tritici 13 days
TraesCS3A02G350400.1	62.70947705	3.748177245	0.854949097	4.384094046	1.16469E-05	0.00163132	cv Sevin Septoria tritici 13 days
TraesCS3A02G354800.1	118.2966028	2.532079532	0.696397891	3.635966686	0.00027694	0.015004494	cv Sevin Septoria tritici 13 days
TraesCS3A02G359700.1	26.80353741	10.20475134	2.925804356	3.487844742	0.000486931	0.02146203	cv Sevin Septoria tritici 13 days
TraesCS3A02G398300.1	196.4400394	1.479512101	0.36935445	4.00567016	6.18419E-05	0.005447272	cv Sevin Septoria tritici 13 days
TraesCS3A02G412500.1	12.89813515	9.134987482	2.909835499	3.139348421	0.00169324	0.048707265	cv Sevin Septoria tritici 13 days
TraesCS3A02G414400.1	37.7023027	3.39748213	1.048094733	3.241579241	0.001188694	0.038650728	cv Sevin Septoria tritici 13 days
TraesCS3A02G446600.1	151.1999573	3.897291522	1.172818871	3.323012289	0.00089051	0.031884096	cv Sevin Septoria tritici 13 days
TraesCS3A02G492200.1	11.50018656	7.490854835	2.071893676	3.615462956	0.000299811	0.015668262	cv Sevin Septoria tritici 13 days
TraesCS3A02G507500.1	173.011307	1.83593191	0.524873416	3.497856542	0.000469013	0.020946539	cv Sevin Septoria tritici 13 days
TraesCS3B02G039700.1	52.5028807	2.955849186	0.898330354	3.290381064	0.001000518	0.03450627	cv Sevin Septoria tritici 13 days
TraesCS3B02G069100.1	92.70457073	2.232139404	0.708449422	3.150739254	0.001628578	0.047448753	cv Sevin Septoria tritici 13 days
TraesCS3B02G128500.1	26.89012869	3.1096995	0.886566859	3.507574717	0.000452211	0.02048691	cv Sevin Septoria tritici 13 days
TraesCS3B02G155900.1	196.8323543	7.683625001	0.6865619	11.19145266	4.49016E-29	1.27354E-24	cv Sevin Septoria tritici 13 days
TraesCS3B02G161600.3	17.82299063	7.594773672	1.683857781	4.510341525	6.47233E-06	0.00313688	cv Sevin Septoria tritici 4 days
TraesCS3B02G161600.3	17.82299063	7.832451572	2.006747906	3.903057055	9.49853E-05	0.007384618	cv Sevin Septoria tritici 13 days
TraesCS3B02G196300.3	114.9589754	1.987517099	0.596198883	3.333647807	0.000857151	0.031074213	cv Sevin Septoria tritici 13 days
TraesCS3B02G199000.1	76.11446548	2.633467877	0.779795868	3.377124689	0.000732478	0.028288371	cv Sevin Septoria tritici 13 days
TraesCS3B02G205100.1	131.7122927	1.376664316	0.406008291	3.390729565	0.000697068	0.027383592	cv Sevin Septoria tritici 13 days
TraesCS3B02G239400.1	39.62908388	3.323844482	1.046829905	3.175152395	0.001497578	0.045187035	cv Sevin Septoria tritici 13 days
TraesCS3B02G250000.1	11.75906384	7.162789195	1.514442483	4.729654163	2.24903E-06	0.001226264	cv Sevin Septoria tritici 4 days
TraesCS3B02G256500.1	21.52783538	8.406003187	2.135182336	3.936901801	8.25404E-05	0.006727277	cv Sevin Septoria tritici 13 days
TraesCS3B02G265700.1	398.5083773	1.156920781	0.358452099	3.2275464	0.001248568	0.039835828	cv Sevin Septoria tritici 13 days
TraesCS3B02G272300.1	44.78110809	3.917836267	1.019162148	3.844173641	0.000120959	0.00866356	cv Sevin Septoria tritici 13 days
TraesCS3B02G273100.1	19.76552911	4.195506695	1.23974843	3.384159716	0.000713965	0.027854439	cv Sevin Septoria tritici 13 days
TraesCS3B02G293200.1	89.81537992	4.526900325	0.796616321	5.682660778	1.32615E-08	6.59888E-06	cv Sevin Septoria tritici 13 days
TraesCS3B02G300300.1	136.707529	2.786829502	0.779897947	3.57332586	0.000352476	0.017401684	cv Sevin Septoria tritici 13 days
TraesCS3B02G301100.1	108.4771947	1.604864445	0.481027624	3.336324914	0.000848939	0.030889611	cv Sevin Septoria tritici 13 days
TraesCS3B02G307700.2	65.00331387	3.733173274	0.716197423	5.212491911	1.86321E-07	5.39246E-05	cv Sevin Septoria tritici 13 days
TraesCS3B02G310900.1	115.4936536	2.692572198	0.836118193	3.220324853	0.001280454	0.040578234	cv Sevin Septoria tritici 13 days
TraesCS3B02G317500.1	18.40659037	3.945126346	1.177964865	3.349103579	0.000810735	0.029996534	cv Sevin Septoria tritici 13 days
TraesCS3B02G328700.1	13.88411662	4.540034555	1.134200825	4.002848927	6.25843E-05	0.005504117	cv Sevin Septoria tritici 13 days
TraesCS3B02G331100.1	534.0898509	2.443115826	0.401086957	6.091237277	1.12041E-09	9.48606E-07	cv Sevin Septoria tritici 13 days
TraesCS3B02G339200.2	57.43524507	24.06524548	4.081035102	5.896848441	3.7051E-09	1.46604E-05	cv Sevin Septoria tritici 4 days
TraesCS3B02G356700.1	53.3311839	3.364244418	0.581027994	5.790158915	7.03199E-09	3.94947E-06	cv Sevin Septoria tritici 13 days
TraesCS3B02G362500.1	50.20743895	23.83955104	4.081117717	5.841426955	5.17556E-09	1.64185E-05	cv Sevin Septoria tritici 4 days
TraesCS3B02G368600.2	11.1081311	7.000585016	1.840180448	3.804292684	0.00014221	0.048885613	cv Sevin Septoria tritici 4 days
TraesCS3B02G368600.2	11.1081311	7.86416501	2.217690928	3.546105056	0.00039097	0.018612786	cv Sevin Septoria tritici 13 days
TraesCS3B02G370700.1	28.2121862	2.460189784	0.694870574	3.540500746	0.000399369	0.018769268	cv Sevin Septoria tritici 13 days
TraesCS3B02G379200.1	90.83955044	2.978185324	0.723194789	4.118095665	3.82016E-05	0.003897526	cv Sevin Septoria tritici 13 days
TraesCS3B02G382900.1	68.27310498	3.365081167	0.98263907	3.424534267	0.000615854	0.025078926	cv Sevin Septoria tritici 13 days
TraesCS3B02G392100.1	85.83459776	4.924288892	0.773082823	6.36967831	1.89425E-10	2.14907E-07	cv Sevin Septoria tritici 13 days
TraesCS3B02G392200.1	16.00412446	9.449107746	2.657433284	3.555727176	0.000376935	0.018244044	cv Sevin Septoria tritici 13 days
TraesCS3B02G392500.1	15.66575162	8.663670961	1.758665925	4.926274421	8.38123E-07	0.000191707	cv Sevin Septoria tritici 13 days
TraesCS3B02G446400.1	33.36062597	10.52048991	2.625185362	4.007522695	6.1359E-05	0.005445201	cv Sevin Septoria tritici 13 days
TraesCS3B02G446500.1	31.05989314	10.4173916	2.720260321	3.82955687	0.000128374	0.009012569	cv Sevin Septoria tritici 13 days
TraesCS3B02G465200.1	30.55595129	7.027876421	2.095859204	3.353219724	0.000798773	0.029712248	cv Sevin Septoria tritici 13 days
TraesCS3B02G472800.1	33.32576896	2.526365358	0.748125764	3.376926021	0.000733008	0.028288371	cv Sevin Septoria tritici 13 days
TraesCS3B02G481800.1	207.6609149	3.140135036	0.924309364	3.397277102	0.0006806	0.026848207	cv Sevin Septoria tritici 13 days
TraesCS3B02G496500.1	74.70348278	3.117343247	0.88601319	3.518393725	0.000434168	0.019939444	cv Sevin Septoria tritici 13 days
TraesCS3B02G526000.1	457.0035375	3.681639585	1.00214705	3.673751856	0.000239015	0.013640198	cv Sevin Septoria tritici 13 days
TraesCS3B02G575500.1	193.7032992	2.231664361	0.617781959	3.612381891	0.000303397	0.015746126	cv Sevin Septoria tritici 13 days
TraesCS3B02G611800.1	86.22023966	3.694650835	0.690525591	5.350490817	8.7716E-08	2.94425E-05	cv Sevin Septoria tritici 13 days
TraesCS3D02G037000.1	50.55105578	3.765341404	1.14416101	3.290919171	0.000998606	0.034498736	cv Sevin Septoria tritici 13 days
TraesCS3D02G040700.1	21.30525325	5.504465543	1.580254267	3.483278392	0.000495313	0.021696622	cv Sevin Septoria tritici 13 days
TraesCS3D02G050400.1	42.45911738	2.995328247	0.893454656	3.352524078	0.000800783	0.029767498	cv Sevin Septoria tritici 13 days
TraesCS3D02G072700.1	144.7458211	1.907913835	0.534935838	3.566621827	0.000361613	0.01770683	cv Sevin Septoria tritici 13 days
TraesCS3D02G077200.2	407.0255054	2.403034602	0.720899686	3.333382781	0.000857968	0.031078609	cv Sevin Septoria tritici 13 days
TraesCS3D02G085400.1	250.5513374	1.610638616	0.488640531	3.296162547	0.000980153	0.034047858	cv Sevin Septoria tritici 13 days
TraesCS3D02G087500.1	151.8013255	1.822930235	0.403375396	4.519190445	6.20765E-06	0.001017732	cv Sevin Septoria tritici 13 days
TraesCS3D02G101800.1	97.70967118	1.884987178	0.601804814	3.132223496	0.001734878	0.049428581	cv Sevin Septoria tritici 13 days
TraesCS3D02G108500.1	42.4981471	3.651298097	1.099295858	3.321488088	0.000895388	0.031944517	cv Sevin Septoria tritici 13 days
TraesCS3D02G121600.3	19.25449765	4.632444913	1.348033788	3.436445699	0.0005894	0.024355428	cv Sevin Septoria tritici 13 days
TraesCS3D02G124300.1	150.526692	1.815841016	0.477476788	3.80299328	0.000142958	0.009711915	cv Sevin Septoria tritici 13 days
TraesCS3D02G160600.3	22.5726256	9.948662478	2.303435405	4.319054251	1.56699E-05	0.017335416	cv Sevin Septoria tritici 10 days
TraesCS3D02G179200.1	133.3604047	2.970749504	0.874331927	3.397736505	0.000679458	0.026840495	cv Sevin Septoria tritici 13 days
TraesCS3D02G188100.1	47.89562635	22.87905794	4.081254309	5.605888829	2.07189E-08	3.70767E-05	cv Sevin Septoria tritici 4 days
TraesCS3D02G188100.1	47.89562635	21.16525474	5.204938333	4.066379538	4.77491E-05	0.033162125	cv Sevin Septoria tritici 10 days
TraesCS3D02G219100.2	30.37126814	3.041798109	0.970359906	3.134711245	0.001720233	0.049215831	cv Sevin Septoria tritici 13 days
TraesCS3D02G225800.1	37.44685457	6.681553045	1.2244885	5.456607429	4.85318E-08	1.77614E-05	cv Sevin Septoria tritici 13 days
TraesCS3D02G246000.1	80.46671507	1.870384993	0.566986789	3.298815829	0.000970936	0.033831271	cv Sevin Septoria tritici 13 days
TraesCS3D02G260300.1	210.0654425	3.783779906	0.662246021	5.713556274	1.10639E-08	5.62122E-06	cv Sevin Septoria tritici 13 days
TraesCS3D02G260500.1	43.36139753	4.484787746	1.234202887	3.633752434	0.000279329	0.015114322	cv Sevin Septoria tritici 13 days
TraesCS3D02G267900.1	100.030967	1.550732657	0.454897134	3.408974343	0.000652076	0.02608589	cv Sevin Septoria tritici 13 days
TraesCS3D02G273200.1	33.3302973	3.733470724	1.004303983	3.717470793	0.000201227	0.012091967	cv Sevin Septoria tritici 13 days
TraesCS3D02G276900.1	39.27421405	3.226528733	0.955909782	3.375348587	0.000737222	0.02831768	cv Sevin Septoria tritici 13 days
TraesCS3D02G277000.1	75.51949157	3.342595605	0.988508052	3.381455112	0.00072103	0.028063554	cv Sevin Septoria tritici 13 days
TraesCS3D02G278000.1	40.40607132	1.887319536	0.601396973	3.138225867	0.001699738	0.048844662	cv Sevin Septoria tritici 13 days
TraesCS3D02G299200.1	126.1949522	2.119033425	0.527832054	4.014597839	5.95472E-05	0.005361709	cv Sevin Septoria tritici 13 days
TraesCS3D02G305300.1	30.72334206	6.227923294	1.626861903	3.828181901	0.000129093	0.009051852	cv Sevin Septoria tritici 13 days
TraesCS3D02G312900.2	113.7578694	1.790790942	0.545064782	3.28546441	0.001018144	0.034792313	cv Sevin Septoria tritici 13 days
TraesCS3D02G315700.1	55.72094543	2.308418205	0.666919918	3.461312433	0.000537549	0.022909827	cv Sevin Septoria tritici 13 days
TraesCS3D02G320700.1	70.8605197	3.779911277	0.590076533	6.405798343	1.49585E-10	1.80539E-07	cv Sevin Septoria tritici 13 days
TraesCS3D02G348800.2	101.5401296	3.173717239	0.780026925	4.068727807	4.72705E-05	0.004575884	cv Sevin Septoria tritici 13 days
TraesCS3D02G353600.1	78.72163332	3.018148668	0.750773703	4.020051125	5.81855E-05	0.005286035	cv Sevin Septoria tritici 13 days
TraesCS3D02G353700.1	22.33541741	8.442276531	1.937326635	4.357693936	1.3144E-05	0.001783748	cv Sevin Septoria tritici 13 days
TraesCS3D02G353900.1	38.68705468	5.083677679	1.142717099	4.448763113	8.63662E-06	0.001285882	cv Sevin Septoria tritici 13 days
TraesCS3D02G369200.1	74.93476311	2.811831313	0.812124666	3.462314878	0.00053555	0.022859007	cv Sevin Septoria tritici 13 days
TraesCS3D02G377300.1	10.24349327	4.31270043	1.27593463	3.380032431	0.000724773	0.02810216	cv Sevin Septoria tritici 13 days
TraesCS3D02G392300.1	558.1561227	2.861678972	0.515583369	5.550370983	2.85064E-08	1.19381E-05	cv Sevin Septoria tritici 13 days
TraesCS3D02G407000.1	44.0590336	10.92179757	2.286779718	4.776060188	1.78763E-06	0.000371447	cv Sevin Septoria tritici 13 days
TraesCS3D02G423800.1	22.68632335	7.896748747	1.754242533	4.501514813	6.74709E-06	0.001072087	cv Sevin Septoria tritici 13 days
TraesCS3D02G424000.1	23.07477564	5.790049744	1.810114402	3.198720333	0.00138039	0.042742362	cv Sevin Septoria tritici 13 days
TraesCS3D02G499700.1	16.94039216	6.651111771	1.530295817	4.346291545	1.38459E-05	0.001861184	cv Sevin Septoria tritici 13 days
TraesCS4A02G007800.1	18.65147757	5.971156146	1.391751106	4.290390803	1.78359E-05	0.002253361	cv Sevin Septoria tritici 13 days
TraesCS4A02G007900.1	13.63914865	4.385161006	1.228813791	3.568613111	0.000358876	0.017610376	cv Sevin Septoria tritici 13 days
TraesCS4A02G044000.1	181.0458021	3.378126827	0.812583194	4.157268884	3.22075E-05	0.003505709	cv Sevin Septoria tritici 13 days
TraesCS4A02G046800.1	158.2006557	1.978103244	0.58936582	3.356325013	0.000789857	0.029516087	cv Sevin Septoria tritici 13 days
TraesCS4A02G050500.1	251.5716417	2.056801749	0.391659017	5.251511292	1.50856E-07	4.67585E-05	cv Sevin Septoria tritici 13 days
TraesCS4A02G055900.1	34.80890102	4.186423647	0.971243677	4.310374158	1.62979E-05	0.002115588	cv Sevin Septoria tritici 13 days
TraesCS4A02G065700.1	248.327444	1.257669644	0.398706789	3.154372278	0.001608438	0.047152576	cv Sevin Septoria tritici 13 days
TraesCS4A02G072300.2	17.40932616	9.340575388	2.589772141	3.60671707	0.000310095	0.015991341	cv Sevin Septoria tritici 13 days
TraesCS4A02G075600.1	33.89679787	7.688975017	1.3821011	5.563250774	2.64795E-08	1.15544E-05	cv Sevin Septoria tritici 13 days
TraesCS4A02G083300.5	44.52844843	23.71893308	4.08120158	5.8117524	6.18222E-09	1.65492E-05	cv Sevin Septoria tritici 4 days
TraesCS4A02G096500.1	363.5874507	2.838754674	0.597299291	4.752650328	2.00767E-06	0.000411146	cv Sevin Septoria tritici 13 days
TraesCS4A02G096700.1	137.8106993	2.264174257	0.657308647	3.444613528	0.000571876	0.023845294	cv Sevin Septoria tritici 13 days
TraesCS4A02G106400.1	208.811629	2.19845259	0.634126173	3.466900881	0.000526496	0.022614193	cv Sevin Septoria tritici 13 days
TraesCS4A02G106700.1	136.7490938	1.755604943	0.543134943	3.232354989	0.001227744	0.039422941	cv Sevin Septoria tritici 13 days
TraesCS4A02G107200.2	63.7081337	2.496844488	0.559078618	4.465998888	7.9696E-06	0.001218554	cv Sevin Septoria tritici 13 days
TraesCS4A02G109300.1	181.3202759	2.823172548	0.682621119	4.135782603	3.53747E-05	0.003727189	cv Sevin Septoria tritici 13 days
TraesCS4A02G114000.1	23.05636907	2.741353108	0.864480595	3.171098488	0.001518636	0.045555881	cv Sevin Septoria tritici 13 days
TraesCS4A02G117100.1	31.16392012	4.35407508	0.992428463	4.387293635	1.1477E-05	0.001615492	cv Sevin Septoria tritici 13 days
TraesCS4A02G126400.1	39.30526363	3.417922158	0.789502404	4.329210579	1.49645E-05	0.001987998	cv Sevin Septoria tritici 13 days
TraesCS4A02G130300.1	153.2564334	2.784183643	0.796267734	3.496542087	0.00047133	0.0209864	cv Sevin Septoria tritici 13 days
TraesCS4A02G131500.1	744.3096197	1.687704303	0.53796338	3.137210386	0.001705637	0.048964554	cv Sevin Septoria tritici 13 days
TraesCS4A02G135100.2	958.606061	1.069034116	0.334067764	3.200051699	0.001374029	0.042615195	cv Sevin Septoria tritici 13 days
TraesCS4A02G137900.5	12.60797188	7.597294682	1.770254689	4.29163935	1.77359E-05	0.00809023	cv Sevin Septoria tritici 4 days
TraesCS4A02G137900.5	12.60797188	6.732917418	2.139476411	3.146993061	0.001649589	0.047864231	cv Sevin Septoria tritici 13 days
TraesCS4A02G229800.1	47.22261934	1.906110003	0.608556422	3.132182876	0.001735118	0.049428581	cv Sevin Septoria tritici 13 days
TraesCS4A02G249700.1	12.67428459	4.597005513	1.181738408	3.890036475	0.000100229	0.007601068	cv Sevin Septoria tritici 13 days
TraesCS4A02G252800.1	257.1096653	2.650747463	0.37283011	7.109799861	1.16211E-12	2.99646E-09	cv Sevin Septoria tritici 13 days
TraesCS4A02G252900.1	75.60510281	2.335152715	0.575690113	4.056266838	4.98633E-05	0.004745881	cv Sevin Septoria tritici 13 days
TraesCS4A02G262700.1	217.8002729	2.369771824	0.436382225	5.430495762	5.61977E-08	2.01764E-05	cv Sevin Septoria tritici 13 days
TraesCS4A02G269300.1	33.70658338	2.604136231	0.710246238	3.666525905	0.000245868	0.013850158	cv Sevin Septoria tritici 13 days
TraesCS4A02G288400.1	43.25433139	2.998728021	0.909746347	3.296224307	0.000979937	0.034047858	cv Sevin Septoria tritici 13 days
TraesCS4A02G296300.1	300.2624904	2.939974936	0.935844615	3.141520385	0.001680731	0.048371969	cv Sevin Septoria tritici 13 days
TraesCS4A02G329600.2	50.59464285	23.89095399	4.081112906	5.854029168	4.79804E-09	1.59457E-05	cv Sevin Septoria tritici 4 days
TraesCS4A02G331100.1	27.74967309	3.925638632	1.195608665	3.283380881	0.0010257	0.034966255	cv Sevin Septoria tritici 13 days
TraesCS4A02G352900.1	199.2908105	2.887989739	0.755185718	3.824211276	0.000131191	0.009187608	cv Sevin Septoria tritici 13 days
TraesCS4A02G365700.1	38.28482741	9.251547911	1.563743283	5.916283069	3.29298E-09	2.22378E-06	cv Sevin Septoria tritici 13 days
TraesCS4A02G388900.1	15.60481715	6.892238056	1.716766344	4.014662846	5.95308E-05	0.005361709	cv Sevin Septoria tritici 13 days
TraesCS4A02G389000.1	53.28378757	3.774432	1.163543815	3.243910502	0.001179008	0.038481242	cv Sevin Septoria tritici 13 days
TraesCS4A02G391600.1	68.3408972	2.249538451	0.601307069	3.741081001	0.00018323	0.011432673	cv Sevin Septoria tritici 13 days
TraesCS4A02G401300.1	176.1777467	5.057376962	0.969557497	5.216170242	1.8266E-07	5.31364E-05	cv Sevin Septoria tritici 13 days
TraesCS4A02G403200.1	21.29616692	9.134973092	1.960910051	4.658537544	3.18464E-06	0.000592301	cv Sevin Septoria tritici 13 days
TraesCS4A02G403800.1	13.30918932	5.542487712	1.648321944	3.36250314	0.000772392	0.02909345	cv Sevin Septoria tritici 13 days
TraesCS4A02G405100.1	14.2789243	9.283091781	2.78887123	3.328619723	0.000872775	0.031474269	cv Sevin Septoria tritici 13 days
TraesCS4A02G415500.1	186.8548163	1.619647811	0.465659862	3.478177835	0.000504835	0.021977946	cv Sevin Septoria tritici 13 days
TraesCS4A02G419400.1	321.1393172	1.821148999	0.507206734	3.590545778	0.000329986	0.016521448	cv Sevin Septoria tritici 13 days
TraesCS4A02G445500.1	129.9685016	2.925876924	0.655345813	4.46463053	8.0207E-06	0.001221989	cv Sevin Septoria tritici 13 days
TraesCS4B02G043600.1	472.4446643	1.305052347	0.3216038	4.057950638	4.95052E-05	0.004727666	cv Sevin Septoria tritici 13 days
TraesCS4B02G044400.1	19.86479928	4.960801798	1.437752568	3.450386325	0.000559785	0.02348695	cv Sevin Septoria tritici 13 days
TraesCS4B02G052200.1	304.4176028	2.681358083	0.782373446	3.427209979	0.000609817	0.024904606	cv Sevin Septoria tritici 13 days
TraesCS4B02G062500.1	395.1325729	2.023921613	0.491970396	4.11390935	3.89014E-05	0.003954699	cv Sevin Septoria tritici 13 days
TraesCS4B02G090100.2	73.80543819	23.42217704	4.080913238	5.739444991	9.49873E-09	1.94978E-05	cv Sevin Septoria tritici 4 days
TraesCS4B02G090100.2	73.80543819	16.69889037	5.26782871	3.16997596	0.001524515	0.045708069	cv Sevin Septoria tritici 13 days
TraesCS4B02G115200.1	37.16167374	2.651315486	0.794286872	3.337982259	0.000843891	0.030765156	cv Sevin Septoria tritici 13 days
TraesCS4B02G125700.1	12.3707593	7.29007048	1.770111982	4.118423328	3.81473E-05	0.016120296	cv Sevin Septoria tritici 4 days
TraesCS4B02G170100.1	23.23054297	5.120675809	1.313701939	3.897897732	9.70314E-05	0.007478535	cv Sevin Septoria tritici 13 days
TraesCS4B02G172400.1	58.40732578	2.981848022	0.887458683	3.359985179	0.000779467	0.029274092	cv Sevin Septoria tritici 13 days
TraesCS4B02G187300.1	33.28031553	4.201384349	1.028530074	4.084843465	4.41065E-05	0.004323965	cv Sevin Septoria tritici 13 days
TraesCS4B02G194900.1	134.9651625	3.169428281	0.87584962	3.618690022	0.000296098	0.015606135	cv Sevin Septoria tritici 13 days
TraesCS4B02G197600.1	184.5832991	2.195271303	0.565276907	3.883532609	0.00010295	0.007704387	cv Sevin Septoria tritici 13 days
TraesCS4B02G197800.1	203.4109357	2.152248504	0.655916407	3.28128475	0.001033354	0.035142697	cv Sevin Septoria tritici 13 days
TraesCS4B02G207700.1	117.7911838	2.318025233	0.623226736	3.71939312	0.000199702	0.012064214	cv Sevin Septoria tritici 13 days
TraesCS4B02G210300.1	47.3086526	2.268977685	0.618929989	3.665968242	0.000246405	0.013866609	cv Sevin Septoria tritici 13 days
TraesCS4B02G215100.2	26.30385719	8.708508398	1.43116303	6.084917102	1.16552E-09	8.13425E-06	cv Sevin Septoria tritici 4 days
TraesCS4B02G215100.2	26.30385719	8.328788393	1.65134597	5.043636249	4.56767E-07	0.002829764	cv Sevin Septoria tritici 10 days
TraesCS4B02G227300.1	66.84400734	1.844356352	0.538528822	3.42480528	0.00061524	0.025071922	cv Sevin Septoria tritici 13 days
TraesCS4B02G231400.1	71.74180753	6.278706732	1.724507452	3.640869585	0.000271719	0.014849247	cv Sevin Septoria tritici 13 days
TraesCS4B02G248900.1	42.61614546	2.814590328	0.845191758	3.330120416	0.000868084	0.031364938	cv Sevin Septoria tritici 13 days
TraesCS4B02G254300.1	44.34375746	3.688365297	0.900141648	4.097538767	4.17566E-05	0.004164532	cv Sevin Septoria tritici 13 days
TraesCS4B02G264400.1	96.86104403	3.715537784	0.565254558	6.573211544	4.92414E-11	7.75908E-08	cv Sevin Septoria tritici 13 days
TraesCS4B02G264500.1	147.5429474	7.424518306	1.849793772	4.013700564	5.97742E-05	0.005369493	cv Sevin Septoria tritici 13 days
TraesCS4B02G265100.1	218.0056967	3.096086534	0.919439305	3.367363693	0.000758905	0.028815036	cv Sevin Septoria tritici 13 days
TraesCS4B02G271900.1	193.9374678	4.196298459	1.088809868	3.854023171	0.000116193	0.008417805	cv Sevin Septoria tritici 13 days
TraesCS4B02G297100.1	36.14215563	3.064570955	0.754026049	4.064277298	4.81815E-05	0.004640314	cv Sevin Septoria tritici 13 days
TraesCS4B02G302200.1	41.28132134	8.760447892	1.504761674	5.821817528	5.82111E-09	3.40421E-06	cv Sevin Septoria tritici 13 days
TraesCS4B02G323900.1	16.59801595	3.961719541	1.23822698	3.199509949	0.001376614	0.042648731	cv Sevin Septoria tritici 13 days
TraesCS4B02G339700.1	140.3262101	2.001045023	0.473710569	4.224193326	2.39798E-05	0.002770426	cv Sevin Septoria tritici 13 days
TraesCS4B02G345700.1	27.83781026	2.548708658	0.719083348	3.544385593	0.000393529	0.01868062	cv Sevin Septoria tritici 13 days
TraesCS4B02G346900.1	79.65893913	2.378596014	0.508768846	4.675199811	2.93668E-06	0.000555286	cv Sevin Septoria tritici 13 days
TraesCS4B02G353800.1	90.24790659	3.67204857	1.041441759	3.525927914	0.000422002	0.019493872	cv Sevin Septoria tritici 13 days
TraesCS4B02G377200.1	10.62476321	8.062216129	1.913695843	4.212903611	2.52109E-05	0.002889114	cv Sevin Septoria tritici 13 days
TraesCS4B02G377500.1	16.72019297	8.769008667	2.255006891	3.888683757	0.000100789	0.007608986	cv Sevin Septoria tritici 13 days
TraesCS4D02G002500.1	85.12320491	1.949866526	0.533434597	3.655305703	0.000256876	0.014273406	cv Sevin Septoria tritici 13 days
TraesCS4D02G012100.1	233.6183847	2.523860916	0.524724686	4.809876459	1.51024E-06	0.000319663	cv Sevin Septoria tritici 13 days
TraesCS4D02G014300.1	100.0663111	2.596131363	0.746871847	3.476006458	0.00050894	0.022071967	cv Sevin Septoria tritici 13 days
TraesCS4D02G015100.1	19.36265755	6.617649791	1.557743605	4.248227866	2.15468E-05	0.002584069	cv Sevin Septoria tritici 13 days
TraesCS4D02G015600.1	163.0387058	4.135758824	0.808420978	5.115847978	3.12335E-07	8.47727E-05	cv Sevin Septoria tritici 13 days
TraesCS4D02G023900.1	41.07156563	4.6144388	1.114438806	4.14059415	3.46407E-05	0.003684236	cv Sevin Septoria tritici 13 days
TraesCS4D02G055600.1	77.02058457	3.889109853	0.774654833	5.020442247	5.15526E-07	0.000126051	cv Sevin Septoria tritici 13 days
TraesCS4D02G061400.1	661.7588177	2.431678149	0.382323868	6.36025723	2.01416E-10	2.19722E-07	cv Sevin Septoria tritici 13 days
TraesCS4D02G087100.5	297.6926787	1.466174455	0.415489088	3.528791726	0.000417462	0.01934716	cv Sevin Septoria tritici 13 days
TraesCS4D02G117800.2	285.1954571	2.232280865	0.667958495	3.341945467	0.000831934	0.030500822	cv Sevin Septoria tritici 13 days
TraesCS4D02G132900.4	59.75846847	23.75467399	4.081012393	5.820779675	5.85737E-09	1.65492E-05	cv Sevin Septoria tritici 4 days
TraesCS4D02G172100.1	778.2094423	1.262433437	0.362449907	3.48305631	0.000495724	0.021697874	cv Sevin Septoria tritici 13 days
TraesCS4D02G175200.1	181.3860252	2.497036704	0.628536125	3.972781523	7.10382E-05	0.005978803	cv Sevin Septoria tritici 13 days
TraesCS4D02G180100.1	30.60425277	3.614776645	0.959013604	3.769265243	0.000163729	0.010652373	cv Sevin Septoria tritici 13 days
TraesCS4D02G188600.1	28.4443233	4.956080829	1.066628715	4.646491097	3.37629E-06	0.000617817	cv Sevin Septoria tritici 13 days
TraesCS4D02G195600.1	147.4258687	3.179111199	0.804676572	3.950793784	7.78924E-05	0.006419481	cv Sevin Septoria tritici 13 days
TraesCS4D02G197500.1	58.3514687	2.013933444	0.532049074	3.785240011	0.00015356	0.010260991	cv Sevin Septoria tritici 13 days
TraesCS4D02G197900.1	71.33978334	2.878751166	0.74612252	3.858282104	0.000114187	0.008311065	cv Sevin Septoria tritici 13 days
TraesCS4D02G198500.1	183.8994986	2.031433075	0.521740142	3.89357251	9.87787E-05	0.00753594	cv Sevin Septoria tritici 13 days
TraesCS4D02G227400.1	19.34318902	6.882396739	1.900123641	3.622078369	0.000292246	0.015478918	cv Sevin Septoria tritici 13 days
TraesCS4D02G229900.1	16.1661375	4.539606446	1.213524618	3.740844132	0.000183403	0.011432673	cv Sevin Septoria tritici 13 days
TraesCS4D02G232700.2	21.52134905	5.481294343	1.446001281	3.79065663	0.00015025	0.010079262	cv Sevin Septoria tritici 13 days
TraesCS4D02G245400.1	81.43236104	3.175040402	0.731024438	4.34327532	1.40374E-05	0.001878032	cv Sevin Septoria tritici 13 days
TraesCS4D02G249000.1	26.36671586	3.140104587	0.960169542	3.27036471	0.001074089	0.036021105	cv Sevin Septoria tritici 13 days
TraesCS4D02G264500.1	136.2535071	4.972178942	1.288020144	3.860327004	0.000113235	0.008298954	cv Sevin Septoria tritici 13 days
TraesCS4D02G271000.1	55.74796171	6.072511165	1.839978288	3.300316751	0.000965758	0.033721297	cv Sevin Septoria tritici 13 days
TraesCS4D02G271100.1	38.6092661	6.076824145	1.199894265	5.064466362	4.09546E-07	0.0001056	cv Sevin Septoria tritici 13 days
TraesCS4D02G282600.1	46.6519331	5.107418355	1.513556796	3.37444777	0.00073964	0.028345135	cv Sevin Septoria tritici 13 days
TraesCS4D02G285300.1	99.75315867	4.568668315	0.699567899	6.530700343	6.54629E-11	9.52166E-08	cv Sevin Septoria tritici 13 days
TraesCS4D02G295900.1	34.57682449	3.203583162	0.804982644	3.979692214	6.90045E-05	0.005864898	cv Sevin Septoria tritici 13 days
TraesCS4D02G296000.1	22.11784815	5.056160988	1.134395958	4.457139462	8.30606E-06	0.001249786	cv Sevin Septoria tritici 13 days
TraesCS4D02G297800.2	108.1084953	1.9565895	0.569816067	3.433721184	0.000595356	0.02452591	cv Sevin Septoria tritici 13 days
TraesCS4D02G300500.1	28.30723691	9.550012258	1.833660286	5.208168782	1.90713E-07	5.49158E-05	cv Sevin Septoria tritici 13 days
TraesCS4D02G302800.1	17.87841018	6.030248794	1.735492627	3.474661143	0.000511499	0.022115316	cv Sevin Septoria tritici 13 days
TraesCS4D02G312900.1	201.4057426	1.287337669	0.405754908	3.17269771	0.001510297	0.045401749	cv Sevin Septoria tritici 13 days
TraesCS4D02G316500.1	519.6284675	1.095549477	0.344873641	3.176669209	0.001489769	0.045068465	cv Sevin Septoria tritici 13 days
TraesCS4D02G318700.1	22.95662559	2.911875261	0.917071791	3.175187907	0.001497395	0.045187035	cv Sevin Septoria tritici 13 days
TraesCS4D02G347700.1	107.4652605	3.562269117	0.737935194	4.827346823	1.38364E-06	0.000298435	cv Sevin Septoria tritici 13 days
TraesCS5A02G003700.1	125.5548228	3.081899889	0.977430114	3.153064188	0.001615663	0.047315364	cv Sevin Septoria tritici 13 days
TraesCS5A02G016200.1	170.7232089	4.358476258	0.789459882	5.520833112	3.37396E-08	1.35397E-05	cv Sevin Septoria tritici 13 days
TraesCS5A02G025400.1	192.506055	2.888988108	0.492128058	5.870399095	4.34747E-09	2.80232E-06	cv Sevin Septoria tritici 13 days
TraesCS5A02G051000.1	27.85236328	3.202086548	0.963255641	3.324233372	0.00088662	0.031802128	cv Sevin Septoria tritici 13 days
TraesCS5A02G059600.1	118.4841943	2.38951606	0.698333618	3.421739981	0.000622218	0.025252946	cv Sevin Septoria tritici 13 days
TraesCS5A02G061000.1	140.2855774	1.643763688	0.477970545	3.439048089	0.000583764	0.02419143	cv Sevin Septoria tritici 13 days
TraesCS5A02G076900.1	56.73359226	3.252763894	0.96789318	3.360664132	0.000777553	0.029229609	cv Sevin Septoria tritici 13 days
TraesCS5A02G104200.2	278.7580193	2.026653327	0.502166377	4.035820439	5.44118E-05	0.005059942	cv Sevin Septoria tritici 13 days
TraesCS5A02G142000.1	300.2379497	2.852719517	0.642421415	4.440573505	8.97195E-06	0.001325371	cv Sevin Septoria tritici 13 days
TraesCS5A02G155300.1	70.2109208	2.902703447	0.772586251	3.757125423	0.000171876	0.010930335	cv Sevin Septoria tritici 13 days
TraesCS5A02G163400.1	166.76265	5.476538744	1.377917737	3.97450341	7.05263E-05	0.005953381	cv Sevin Septoria tritici 13 days
TraesCS5A02G168600.1	770.2596708	1.509917276	0.360941805	4.183270695	2.87345E-05	0.003202343	cv Sevin Septoria tritici 13 days
TraesCS5A02G210100.1	818.4179335	2.133246162	0.618627258	3.448354616	0.000564013	0.023611957	cv Sevin Septoria tritici 13 days
TraesCS5A02G212800.1	22.60238118	5.124019626	0.988017091	5.186164971	2.14669E-07	6.15015E-05	cv Sevin Septoria tritici 13 days
TraesCS5A02G213600.1	387.4512202	4.157717768	1.287918749	3.228245394	0.001245521	0.039782326	cv Sevin Septoria tritici 13 days
TraesCS5A02G217000.1	24.67283022	4.679049076	1.194197911	3.91815212	8.92304E-05	0.00706939	cv Sevin Septoria tritici 13 days
TraesCS5A02G220600.1	198.8090641	3.271699609	0.988218012	3.310706312	0.000930608	0.032788623	cv Sevin Septoria tritici 13 days
TraesCS5A02G228900.1	339.3464941	5.45243906	1.447920214	3.765704082	0.00016608	0.010754654	cv Sevin Septoria tritici 13 days
TraesCS5A02G229000.1	97.10814637	3.064532608	0.780412864	3.92680945	8.60801E-05	0.006887138	cv Sevin Septoria tritici 13 days
TraesCS5A02G233200.1	53.11231588	3.220559203	0.988922785	3.256633632	0.001127418	0.037225809	cv Sevin Septoria tritici 13 days
TraesCS5A02G248100.1	17.73476096	3.99809625	1.184319506	3.375859494	0.000735855	0.02831768	cv Sevin Septoria tritici 13 days
TraesCS5A02G251390.2	155.9415857	1.744147369	0.463993801	3.758988518	0.000170602	0.010873652	cv Sevin Septoria tritici 13 days
TraesCS5A02G261400.1	100.629431	4.921910185	1.046841433	4.701676902	2.58034E-06	0.000499564	cv Sevin Septoria tritici 13 days
TraesCS5A02G269500.1	228.4985562	2.103283023	0.636861874	3.302573306	0.00095802	0.033566811	cv Sevin Septoria tritici 13 days
TraesCS5A02G284600.1	169.8106868	1.6326223	0.417972102	3.906055674	9.38149E-05	0.007310088	cv Sevin Septoria tritici 13 days
TraesCS5A02G286100.2	116.9467754	2.19890825	0.703090685	3.127488811	0.001763065	0.049658214	cv Sevin Septoria tritici 13 days
TraesCS5A02G287000.1	23.12237239	9.263118626	2.281268465	4.060512284	4.89652E-05	0.004687574	cv Sevin Septoria tritici 13 days
TraesCS5A02G295200.1	863.5673432	2.162188938	0.680428269	3.177688284	0.001484543	0.044954182	cv Sevin Septoria tritici 13 days
TraesCS5A02G301700.1	27.70253993	5.744202446	1.536427525	3.738674524	0.000184993	0.011506486	cv Sevin Septoria tritici 13 days
TraesCS5A02G321000.1	30.80801864	3.11827346	0.989420772	3.151615114	0.001623701	0.04736877	cv Sevin Septoria tritici 13 days
TraesCS5A02G321300.1	729.1818051	3.084085152	0.97691198	3.156973418	0.001594159	0.047006634	cv Sevin Septoria tritici 13 days
TraesCS5A02G326100.1	1074.351388	1.338666917	0.366630022	3.651274679	0.000260942	0.014413042	cv Sevin Septoria tritici 13 days
TraesCS5A02G337400.1	39.01133041	8.691957778	1.314070384	6.614529848	3.72734E-11	6.60742E-08	cv Sevin Septoria tritici 13 days
TraesCS5A02G337500.1	34.1884939	9.097274646	1.519180752	5.988276666	2.12076E-09	1.52281E-06	cv Sevin Septoria tritici 13 days
TraesCS5A02G375000.1	143.1235949	2.270096384	0.667504805	3.40086898	0.00067172	0.026664798	cv Sevin Septoria tritici 13 days
TraesCS5A02G379800.1	37.6535747	4.203661687	0.919934471	4.56952296	4.88836E-06	0.000827752	cv Sevin Septoria tritici 13 days
TraesCS5A02G380900.2	25.00153639	4.76092836	1.438600699	3.309416132	0.000934908	0.032878843	cv Sevin Septoria tritici 13 days
TraesCS5A02G400500.1	50.9824291	5.284224187	1.40834269	3.752086922	0.000175369	0.011077908	cv Sevin Septoria tritici 13 days
TraesCS5A02G403200.1	38.86641254	4.73561867	1.438186531	3.292770838	0.000992053	0.034335081	cv Sevin Septoria tritici 13 days
TraesCS5A02G413300.1	291.4006264	1.95124933	0.483992283	4.031571159	5.54052E-05	0.005127106	cv Sevin Septoria tritici 13 days
TraesCS5A02G426500.1	29.7039293	3.454547038	0.836213829	4.131176639	3.60911E-05	0.003770358	cv Sevin Septoria tritici 13 days
TraesCS5A02G427400.1	23.67188535	4.329387301	1.123008022	3.855170413	0.000115649	0.00838914	cv Sevin Septoria tritici 13 days
TraesCS5A02G439700.1	40.74845873	6.779961305	1.186755126	5.713024664	1.10986E-08	5.62122E-06	cv Sevin Septoria tritici 13 days
TraesCS5A02G447200.1	115.8300887	3.65253269	1.10877587	3.294202902	0.000987012	0.034202355	cv Sevin Septoria tritici 13 days
TraesCS5A02G448900.1	27.28393231	2.83709402	0.751941277	3.773026044	0.000161279	0.010561381	cv Sevin Septoria tritici 13 days
TraesCS5A02G451400.1	15.53047542	5.056366679	1.078304836	4.689181122	2.74301E-06	0.000523905	cv Sevin Septoria tritici 13 days
TraesCS5A02G453200.1	17.84078635	5.775678987	1.436797866	4.01982709	5.82409E-05	0.005286035	cv Sevin Septoria tritici 13 days
TraesCS5A02G467600.1	842.8976516	1.581686041	0.493084114	3.207740822	0.00133782	0.041730297	cv Sevin Septoria tritici 13 days
TraesCS5A02G475300.1	27.04822148	8.748383967	1.575480519	5.552835382	2.81073E-08	1.19381E-05	cv Sevin Septoria tritici 13 days
TraesCS5A02G508500.1	167.501502	2.850447572	0.545139213	5.228843397	1.70574E-07	5.09261E-05	cv Sevin Septoria tritici 13 days
TraesCS5A02G515600.1	198.3366786	2.573428691	0.73535815	3.499558263	0.00046603	0.020946539	cv Sevin Septoria tritici 13 days
TraesCS5A02G543700.1	41.62669067	10.82039759	1.6593817	6.520740579	6.99611E-11	9.92153E-08	cv Sevin Septoria tritici 13 days
TraesCS5A02G545200.1	16.58753083	8.758824658	1.892865425	4.627283346	3.70493E-06	0.000671457	cv Sevin Septoria tritici 13 days
TraesCS5B02G023300.1	347.5760201	2.339129113	0.687484651	3.402445581	0.000667857	0.026567202	cv Sevin Septoria tritici 13 days
TraesCS5B02G063500.1	97.68726308	2.172567945	0.665064639	3.266701939	0.001088082	0.036263756	cv Sevin Septoria tritici 13 days
TraesCS5B02G063600.1	483.9379128	2.104587254	0.537404708	3.916205466	8.99536E-05	0.007080123	cv Sevin Septoria tritici 13 days
TraesCS5B02G066900.1	183.6380996	2.522639723	0.640871736	3.936263034	8.27603E-05	0.006735522	cv Sevin Septoria tritici 13 days
TraesCS5B02G071100.1	40.82767365	2.504301054	0.62328843	4.017884711	5.87229E-05	0.005313436	cv Sevin Septoria tritici 13 days
TraesCS5B02G082700.1	110.0446734	2.542014449	0.657904165	3.863806593	0.000111634	0.008202758	cv Sevin Septoria tritici 13 days
TraesCS5B02G083600.1	146.2754056	2.6967142	0.759109795	3.552469247	0.000381634	0.01840863	cv Sevin Septoria tritici 13 days
TraesCS5B02G108900.1	18.83634253	2.662991934	0.851411537	3.127737667	0.001761573	0.049658214	cv Sevin Septoria tritici 13 days
TraesCS5B02G114400.1	197.9927102	2.494189457	0.768695068	3.244705947	0.00117572	0.038440272	cv Sevin Septoria tritici 13 days
TraesCS5B02G146600.1	45.82911385	2.759272236	0.733115921	3.763759804	0.000167378	0.010764926	cv Sevin Septoria tritici 13 days
TraesCS5B02G160700.1	55.13285206	6.714500035	1.189919365	5.642819367	1.67288E-08	7.90797E-06	cv Sevin Septoria tritici 13 days
TraesCS5B02G165400.2	586.4581588	1.953645693	0.403988675	4.83589223	1.3255E-06	0.000289193	cv Sevin Septoria tritici 13 days
TraesCS5B02G192000.2	13.31364559	9.147919581	2.89801106	3.156619969	0.001596092	0.047006634	cv Sevin Septoria tritici 13 days
TraesCS5B02G209200.1	142.6647486	3.36682417	0.998372308	3.372313257	0.000745396	0.028473631	cv Sevin Septoria tritici 13 days
TraesCS5B02G211000.1	43.4276963	6.222768074	0.992341344	6.270793925	3.59212E-10	3.34043E-07	cv Sevin Septoria tritici 13 days
TraesCS5B02G217000.1	18.67864501	4.712674796	1.106410937	4.259425352	2.04953E-05	0.00250564	cv Sevin Septoria tritici 13 days
TraesCS5B02G219700.1	184.8758633	3.321964939	0.90749395	3.660591829	0.000251633	0.014035549	cv Sevin Septoria tritici 13 days
TraesCS5B02G231000.1	28.64653087	3.903145023	1.085237844	3.596580273	0.000322428	0.016313287	cv Sevin Septoria tritici 13 days
TraesCS5B02G259800.1	317.4918391	1.265397936	0.375749055	3.367667649	0.000758069	0.028802568	cv Sevin Septoria tritici 13 days
TraesCS5B02G275600.1	40.3505761	3.439561161	1.027110934	3.348772804	0.000811703	0.029996534	cv Sevin Septoria tritici 13 days
TraesCS5B02G283800.2	280.7651234	2.009551378	0.519542384	3.867925771	0.000109765	0.008096922	cv Sevin Septoria tritici 13 days
TraesCS5B02G285400.1	139.4760513	2.715777823	0.723009966	3.756210771	0.000172505	0.010942458	cv Sevin Septoria tritici 13 days
TraesCS5B02G291100.1	101.1909608	4.127991549	1.143663363	3.609446348	0.000306851	0.015881791	cv Sevin Septoria tritici 13 days
TraesCS5B02G299000.1	38.37801464	5.818998788	1.028975397	5.655138894	1.5572E-08	7.54743E-06	cv Sevin Septoria tritici 13 days
TraesCS5B02G321800.1	215.8774846	2.999667818	0.91290916	3.285833846	0.00101681	0.034767659	cv Sevin Septoria tritici 13 days
TraesCS5B02G336200.1	18.72037523	8.923046224	2.056916486	4.338069283	1.4374E-05	0.001918538	cv Sevin Septoria tritici 13 days
TraesCS5B02G371100.1	47.11530216	2.071074625	0.590092687	3.509744607	0.000448537	0.020420326	cv Sevin Septoria tritici 13 days
TraesCS5B02G384500.1	29.67480195	2.994025533	0.954901474	3.13542875	0.001716031	0.049163424	cv Sevin Septoria tritici 13 days
TraesCS5B02G399800.1	389.0024586	2.099627921	0.479460413	4.379147612	1.19144E-05	0.001657348	cv Sevin Septoria tritici 13 days
TraesCS5B02G403700.1	310.7518382	3.343876722	0.889233338	3.760404135	0.000169639	0.010836651	cv Sevin Septoria tritici 13 days
TraesCS5B02G405300.1	94.29151376	5.486381904	1.408606627	3.894899966	9.82393E-05	0.007530703	cv Sevin Septoria tritici 13 days
TraesCS5B02G416700.1	448.946374	1.63299478	0.509374424	3.205882952	0.001346487	0.041898436	cv Sevin Septoria tritici 13 days
TraesCS5B02G428000.2	52.91786625	23.92864088	4.081084218	5.863304848	4.53744E-09	1.59457E-05	cv Sevin Septoria tritici 4 days
TraesCS5B02G442600.1	12.03648854	4.993368588	1.546493653	3.228832253	0.001242968	0.039782326	cv Sevin Septoria tritici 13 days
TraesCS5B02G443100.1	39.96384403	9.314121856	1.774243398	5.249630274	1.52405E-07	4.67585E-05	cv Sevin Septoria tritici 13 days
TraesCS5B02G462200.1	39.5834336	4.021890087	1.096141992	3.669132391	0.000243375	0.01377492	cv Sevin Septoria tritici 13 days
TraesCS5B02G468300.1	12.98684619	7.576942825	1.832623574	4.134478532	3.55762E-05	0.003737209	cv Sevin Septoria tritici 13 days
TraesCS5B02G480900.1	14.33558114	7.384984135	2.245422597	3.288906126	0.001005776	0.034577957	cv Sevin Septoria tritici 13 days
TraesCS5B02G503200.1	971.5714044	1.504546939	0.477389941	3.15161006	0.00162373	0.04736877	cv Sevin Septoria tritici 13 days
TraesCS5B02G507500.1	17.27137805	8.115428525	2.08488605	3.892504592	9.92146E-05	0.007554428	cv Sevin Septoria tritici 13 days
TraesCS5B02G515500.1	141.9990782	1.664286407	0.492376294	3.380110753	0.000724566	0.02810216	cv Sevin Septoria tritici 13 days
TraesCS5B02G520400.1	43.73767306	4.553845542	1.212466778	3.75585181	0.000172753	0.010942458	cv Sevin Septoria tritici 13 days
TraesCS5B02G520800.1	27.06697674	3.087471088	0.896966508	3.442125277	0.000577163	0.024003037	cv Sevin Septoria tritici 13 days
TraesCS5D02G004700.1	232.6995188	2.771092698	0.795780865	3.482230875	0.000497255	0.021748091	cv Sevin Septoria tritici 13 days
TraesCS5D02G008300.1	81.16217108	3.463606532	0.855869197	4.046887707	5.19031E-05	0.034575294	cv Sevin Septoria tritici 10 days
TraesCS5D02G031800.1	282.1638299	3.248095838	0.601079469	5.40377106	6.52542E-08	2.29914E-05	cv Sevin Septoria tritici 13 days
TraesCS5D02G071100.1	106.5824068	2.363295216	0.616604912	3.832754444	0.000126716	0.008951576	cv Sevin Septoria tritici 13 days
TraesCS5D02G102300.1	70.53593221	2.7742026	0.708345912	3.916451768	8.98618E-05	0.007080123	cv Sevin Septoria tritici 13 days
TraesCS5D02G116600.1	224.6888363	2.767361569	0.658170543	4.204626897	2.61513E-05	0.002960997	cv Sevin Septoria tritici 13 days
TraesCS5D02G150100.1	102.9677875	3.585184899	0.588150752	6.095690408	1.08966E-09	9.36547E-07	cv Sevin Septoria tritici 13 days
TraesCS5D02G157900.1	91.96131261	2.552498638	0.663796971	3.845300219	0.000120405	0.008649822	cv Sevin Septoria tritici 13 days
TraesCS5D02G160300.1	53.48811018	2.588086749	0.750055011	3.450529244	0.000559489	0.02348695	cv Sevin Septoria tritici 13 days
TraesCS5D02G168400.1	172.2572822	5.644189179	1.467978177	3.844872674	0.000120615	0.008649822	cv Sevin Septoria tritici 13 days
TraesCS5D02G172900.1	1074.851359	1.666937285	0.372617738	4.473585429	7.69188E-06	0.001188909	cv Sevin Septoria tritici 13 days
TraesCS5D02G199200.1	14.87564158	7.245118302	1.992569673	3.636067736	0.000276832	0.015004494	cv Sevin Septoria tritici 13 days
TraesCS5D02G199900.1	45.78574964	8.192514066	1.491975786	5.491050287	3.99551E-08	1.54183E-05	cv Sevin Septoria tritici 13 days
TraesCS5D02G216800.1	21.10664498	6.733523065	1.745320892	3.858043008	0.000114299	0.008311065	cv Sevin Septoria tritici 13 days
TraesCS5D02G218400.1	313.9050794	5.584486482	1.300895768	4.292800869	1.76433E-05	0.002239005	cv Sevin Septoria tritici 13 days
TraesCS5D02G219300.2	66.57953342	5.954706797	1.211036578	4.917032984	8.78658E-07	0.000200172	cv Sevin Septoria tritici 13 days
TraesCS5D02G225900.1	19.77972115	2.899203697	0.78755344	3.681278693	0.000232067	0.013378426	cv Sevin Septoria tritici 13 days
TraesCS5D02G235600.1	32.84485705	3.141840361	0.718549919	4.372473339	1.22847E-05	0.001687315	cv Sevin Septoria tritici 13 days
TraesCS5D02G238700.1	142.6668077	2.44082742	0.739249827	3.301762587	0.000960794	0.033643195	cv Sevin Septoria tritici 13 days
TraesCS5D02G240100.1	40.48297473	2.869387224	0.814145035	3.524417763	0.000424415	0.019573446	cv Sevin Septoria tritici 13 days
TraesCS5D02G257000.1	22.07938392	9.91802223	2.370768777	4.183462481	2.87102E-05	0.003202343	cv Sevin Septoria tritici 13 days
TraesCS5D02G268800.1	119.2465379	3.746586911	1.1253415	3.329288853	0.000870681	0.031438717	cv Sevin Septoria tritici 13 days
TraesCS5D02G292000.1	238.1223737	2.126259937	0.411616908	5.165628268	2.39633E-07	6.72941E-05	cv Sevin Septoria tritici 13 days
TraesCS5D02G328100.1	597.6330827	3.458184482	0.880512296	3.927468699	8.58446E-05	0.006883226	cv Sevin Septoria tritici 13 days
TraesCS5D02G332200.1	1350.318307	1.756575502	0.475187973	3.696590829	0.000218514	0.012818439	cv Sevin Septoria tritici 13 days
TraesCS5D02G342000.1	28.19277224	8.791813207	1.968011585	4.467358461	7.91914E-06	0.001214111	cv Sevin Septoria tritici 13 days
TraesCS5D02G342100.1	52.47048033	9.126699701	1.437561745	6.348735791	2.17092E-10	2.32353E-07	cv Sevin Septoria tritici 13 days
TraesCS5D02G355100.1	435.3479213	1.849769607	0.513983715	3.598887575	0.000319581	0.016253147	cv Sevin Septoria tritici 13 days
TraesCS5D02G365800.1	38.75621184	9.998654989	1.687004724	5.926868401	3.08766E-09	2.11025E-06	cv Sevin Septoria tritici 13 days
TraesCS5D02G370100.1	264.1110695	1.475864163	0.452099168	3.264469984	0.001096691	0.036444572	cv Sevin Septoria tritici 13 days
TraesCS5D02G378100.1	37.47845372	2.952388711	0.875473633	3.372333101	0.000745342	0.028473631	cv Sevin Septoria tritici 13 days
TraesCS5D02G389300.1	27.6748771	4.416179006	1.349180044	3.273231786	0.001063252	0.035833446	cv Sevin Septoria tritici 13 days
TraesCS5D02G404300.1	340.6955411	2.325094616	0.714933994	3.252180808	0.001145231	0.037682366	cv Sevin Septoria tritici 13 days
TraesCS5D02G408200.1	81.90947981	5.42548256	0.843210386	6.434316571	1.2403E-10	1.55243E-07	cv Sevin Septoria tritici 13 days
TraesCS5D02G413000.1	29.21022659	2.68672769	0.859227321	3.126911382	0.001766532	0.049706486	cv Sevin Septoria tritici 13 days
TraesCS5D02G422000.1	413.427254	1.850300795	0.553236238	3.344503971	0.000824298	0.030334972	cv Sevin Septoria tritici 13 days
TraesCS5D02G446800.1	72.10493103	5.295669727	0.876925719	6.038903425	1.55165E-09	1.20215E-06	cv Sevin Septoria tritici 13 days
TraesCS5D02G446900.1	80.24189951	4.390908943	1.220808012	3.596723562	0.000322251	0.016313287	cv Sevin Septoria tritici 13 days
TraesCS5D02G464000.1	45.95099874	4.593776617	0.856232007	5.365107327	8.09011E-08	2.76458E-05	cv Sevin Septoria tritici 13 days
TraesCS5D02G487900.1	2013.440985	3.152286776	0.826867135	3.812325638	0.000137665	0.009534775	cv Sevin Septoria tritici 13 days
TraesCS5D02G488700.1	1238.540665	4.019150739	1.174613007	3.421680769	0.000622353	0.025252946	cv Sevin Septoria tritici 13 days
TraesCS5D02G488800.1	236.5095049	4.26189443	1.076779081	3.958002628	7.55791E-05	0.006267985	cv Sevin Septoria tritici 13 days
TraesCS5D02G488800.2	742.0624345	3.762341143	1.149389653	3.273338274	0.001062852	0.035833446	cv Sevin Septoria tritici 13 days
TraesCS5D02G507600.1	21.03641794	8.405462484	2.124759651	3.955959197	7.62282E-05	0.006312583	cv Sevin Septoria tritici 13 days
TraesCS5D02G513700.1	202.5943449	2.242157469	0.711206032	3.152613122	0.001618161	0.047315364	cv Sevin Septoria tritici 13 days
TraesCS5D02G519600.1	43.32536131	3.318872427	0.689365622	4.81438633	1.47653E-06	0.000314303	cv Sevin Septoria tritici 13 days
TraesCS5D02G535700.1	25.42309772	10.12846365	3.001536465	3.374426321	0.000739697	0.028345135	cv Sevin Septoria tritici 13 days
TraesCS6A02G028800.1	152.4033644	3.091308398	0.476949721	6.481413576	9.08672E-11	1.22727E-07	cv Sevin Septoria tritici 13 days
TraesCS6A02G063900.1	25.42725051	3.954976836	1.208620747	3.272305929	0.001066741	0.035890829	cv Sevin Septoria tritici 13 days
TraesCS6A02G097400.1	22.49799557	6.437303147	1.432152165	4.494845801	6.96204E-06	0.001097024	cv Sevin Septoria tritici 13 days
TraesCS6A02G110500.1	18.25881341	5.279783815	1.342061927	3.934083599	8.35147E-05	0.006767794	cv Sevin Septoria tritici 13 days
TraesCS6A02G110600.1	23.53656617	4.556976724	1.319065892	3.454699839	0.000550906	0.023269308	cv Sevin Septoria tritici 13 days
TraesCS6A02G125800.2	227.5327188	2.25025876	0.682066048	3.299180143	0.000969677	0.03380816	cv Sevin Septoria tritici 13 days
TraesCS6A02G140100.1	321.297509	1.197012663	0.357934666	3.344221101	0.000825139	0.030334972	cv Sevin Septoria tritici 13 days
TraesCS6A02G155600.1	134.4065989	2.743962868	0.681197412	4.028146349	5.62183E-05	0.005178387	cv Sevin Septoria tritici 13 days
TraesCS6A02G160400.1	17.84759439	3.86371578	1.119305563	3.451886516	0.000556682	0.023408697	cv Sevin Septoria tritici 13 days
TraesCS6A02G182500.1	256.3616683	1.292019847	0.406605206	3.177578217	0.001485106	0.044954182	cv Sevin Septoria tritici 13 days
TraesCS6A02G256800.1	13.75811495	7.462862578	1.543994505	4.833477421	1.34169E-06	0.000909102	cv Sevin Septoria tritici 4 days
TraesCS6A02G256800.1	13.75811495	7.195511473	1.814003195	3.966647629	7.28906E-05	0.043286492	cv Sevin Septoria tritici 10 days
TraesCS6A02G256800.1	13.75811495	6.732928228	1.822794363	3.693739878	0.00022098	0.012909684	cv Sevin Septoria tritici 13 days
TraesCS6A02G259200.1	31.69893463	4.34412948	1.14150227	3.805624917	0.000141447	0.00964387	cv Sevin Septoria tritici 13 days
TraesCS6A02G263900.1	168.3374576	1.552872396	0.419445342	3.702204411	0.000213734	0.012590127	cv Sevin Septoria tritici 13 days
TraesCS6A02G281000.1	327.0230467	3.464813425	0.933093456	3.713254447	0.000204611	0.012191978	cv Sevin Septoria tritici 13 days
TraesCS6A02G299200.1	391.2022311	3.76719107	0.820524959	4.591196195	4.40713E-06	0.000766867	cv Sevin Septoria tritici 13 days
TraesCS6A02G301300.1	127.0729293	3.921017935	1.15423999	3.397056045	0.00068115	0.026851232	cv Sevin Septoria tritici 13 days
TraesCS6A02G305000.1	20.43941009	8.265676263	2.166894894	3.814525701	0.000136445	0.00948525	cv Sevin Septoria tritici 13 days
TraesCS6A02G305400.1	77.11690444	1.925972801	0.561513958	3.429964246	0.000603661	0.024706538	cv Sevin Septoria tritici 13 days
TraesCS6A02G306000.1	70.43275539	3.202508619	0.652298012	4.909578993	9.12721E-07	0.000206275	cv Sevin Septoria tritici 13 days
TraesCS6A02G310400.1	21.55062538	4.093500112	0.925040768	4.425210492	9.63483E-06	0.001408168	cv Sevin Septoria tritici 13 days
TraesCS6A02G311900.1	34.17766717	3.743378045	1.112538142	3.36471884	0.000766217	0.028991065	cv Sevin Septoria tritici 13 days
TraesCS6A02G318100.1	37.3078622	3.772325794	1.174582453	3.21163132	0.001319836	0.041432781	cv Sevin Septoria tritici 13 days
TraesCS6A02G320100.2	21.38750382	5.836006786	1.433620938	4.070815815	4.68488E-05	0.019100561	cv Sevin Septoria tritici 4 days
TraesCS6A02G320100.2	21.38750382	6.964191371	1.645536152	4.232171601	2.31446E-05	0.022563384	cv Sevin Septoria tritici 10 days
TraesCS6A02G320100.2	21.38750382	6.746629531	1.647722483	4.094518101	4.23047E-05	0.004202764	cv Sevin Septoria tritici 13 days
TraesCS6A02G322900.1	19.76581698	5.863021231	1.463379096	4.006495136	6.16264E-05	0.005445201	cv Sevin Septoria tritici 13 days
TraesCS6A02G323000.1	14.81533607	6.431709083	1.770067975	3.633594401	0.0002795	0.015114322	cv Sevin Septoria tritici 13 days
TraesCS6A02G344000.4	90.4062379	4.503073186	1.074581532	4.190536549	2.78296E-05	0.003130739	cv Sevin Septoria tritici 13 days
TraesCS6A02G349000.1	229.4818075	2.044598813	0.625693504	3.267732204	0.001084129	0.036239421	cv Sevin Septoria tritici 13 days
TraesCS6A02G378000.1	206.611045	1.254682893	0.392710528	3.194930629	0.001398645	0.043119299	cv Sevin Septoria tritici 13 days
TraesCS6A02G382300.1	18.85835797	9.689314649	2.527938806	3.832891296	0.000126646	0.008951576	cv Sevin Septoria tritici 13 days
TraesCS6A02G382800.1	12.08557692	9.027094963	2.394559641	3.769835091	0.000163355	0.010651151	cv Sevin Septoria tritici 13 days
TraesCS6A02G392400.1	495.0739938	1.460218247	0.343792318	4.247384741	2.1628E-05	0.002588338	cv Sevin Septoria tritici 13 days
TraesCS6B02G050600.1	112.420976	1.616054815	0.446878328	3.616319505	0.000298822	0.015668262	cv Sevin Septoria tritici 13 days
TraesCS6B02G093100.1	58.20965287	24.08353627	4.081027469	5.901341378	3.60558E-09	1.46604E-05	cv Sevin Septoria tritici 4 days
TraesCS6B02G095100.1	9.95238486	5.565857536	1.355160551	4.107157291	4.00558E-05	0.004050282	cv Sevin Septoria tritici 13 days
TraesCS6B02G127100.1	19.04233125	4.056220602	1.159752104	3.497489322	0.00046966	0.020946539	cv Sevin Septoria tritici 13 days
TraesCS6B02G149900.1	66.0637084	1.625856118	0.517251333	3.143261341	0.001670766	0.048182954	cv Sevin Septoria tritici 13 days
TraesCS6B02G164900.1	863.689873	1.487027212	0.398427858	3.732237045	0.000189787	0.011689299	cv Sevin Septoria tritici 13 days
TraesCS6B02G167900.1	41.97769218	3.0288343	0.837792854	3.6152544	0.000300053	0.015668262	cv Sevin Septoria tritici 13 days
TraesCS6B02G183800.1	143.0524656	2.698022533	0.641405439	4.20642291	2.59445E-05	0.00294345	cv Sevin Septoria tritici 13 days
TraesCS6B02G188300.1	445.9025411	2.038114895	0.61361425	3.321492116	0.000895375	0.031944517	cv Sevin Septoria tritici 13 days
TraesCS6B02G191000.1	46.51556605	2.624183504	0.80847832	3.245830395	0.001171086	0.038332958	cv Sevin Septoria tritici 13 days
TraesCS6B02G194700.2	22.86564663	8.662482734	2.729151592	3.174057007	0.001503242	0.045285653	cv Sevin Septoria tritici 13 days
TraesCS6B02G199700.1	18.10617779	3.528224297	1.099980414	3.207533744	0.001338784	0.041730297	cv Sevin Septoria tritici 13 days
TraesCS6B02G246800.1	70.09800166	5.079154475	1.43543268	3.538413572	0.000402539	0.018856777	cv Sevin Septoria tritici 13 days
TraesCS6B02G281800.1	15.60215451	3.41132273	1.082138177	3.152391072	0.001619392	0.047326969	cv Sevin Septoria tritici 13 days
TraesCS6B02G290900.1	252.5876711	1.897748383	0.551828329	3.439019496	0.000583825	0.02419143	cv Sevin Septoria tritici 13 days
TraesCS6B02G306700.1	128.0319552	2.126815146	0.647635051	3.283971648	0.001023552	0.034935031	cv Sevin Septoria tritici 13 days
TraesCS6B02G309400.3	56.15672353	8.522297602	2.230093214	3.821498379	0.000132643	0.046754079	cv Sevin Septoria tritici 4 days
TraesCS6B02G309800.1	262.4564511	4.067638445	0.803043239	5.065279485	4.07802E-07	0.0001056	cv Sevin Septoria tritici 13 days
[truncated: 207 more rows]

## Sheet: Z_tritici_E-MTAB-4116
Transcript ID	baseMean	log2FoldChange	lfcSE	stat	pvalue	padj	Timepoint (days)
TraesCS1A02G010400.1	13.5046834	4.688039742	1.047477866	4.47555017	7.62148E-06	0.005703426	1
TraesCS1A02G163700.2	44.13830901	18.33905313	1.752139528	10.46666252	1.229E-25	2.05401E-21	1
TraesCS1A02G302500.2	17.33873075	8.521148845	1.992825296	4.27591363	1.90355E-05	0.01182915	1
TraesCS1A02G370800.3	25.82655418	18.72950554	4.146328156	4.517130541	6.26833E-06	0.004798236	1
TraesCS1A02G418700.1	12.67117715	17.03808172	3.909499685	4.358123313	1.31182E-05	0.008769723	1
TraesCS1A02G422700.2	35.07252601	20.02233578	2.685114002	7.456791692	8.86547E-14	2.92525E-10	1
TraesCS1A02G438600.1	79.71654217	20.85867932	4.686606863	4.450699606	8.5591E-06	0.006248207	1
TraesCS1B02G020700.4	73.36590337	18.78160093	2.905772254	6.463548858	1.02275E-10	2.1821E-07	1
TraesCS1B02G118000.2	69.43852112	20.4927509	2.254077058	9.091415413	9.7758E-20	7.54068E-16	1
TraesCS1B02G219200.1	17.77559978	7.306840854	1.780015026	4.10493212	4.04434E-05	0.022656642	1
TraesCS1B02G231400.1	31.86475848	5.575381733	1.13997034	4.890812978	1.0042E-06	0.000968255	1
TraesCS1B02G272900.1	125.3499513	19.05834034	2.990515135	6.372928904	1.85452E-10	3.63771E-07	1
TraesCS1B02G279600.2	43.24365818	19.81918577	4.613727688	4.295699077	1.74144E-05	0.010982771	1
TraesCS1B02G478700.2	91.20431671	7.651715637	1.649436484	4.638987746	3.5012E-06	0.003052953	1
TraesCS1D02G029200.1	15.47292415	5.325838345	1.239271856	4.297554504	1.72693E-05	0.0109602	1
TraesCS1D02G111500.2	16.5799716	19.45123061	4.25784588	4.568326603	4.91634E-06	0.003888891	1
TraesCS1D02G168800.3	16.07517505	18.79244283	2.378030176	7.902524963	2.7331E-15	1.24576E-11	1
TraesCS1D02G331500.1	13.52020656	18.71661525	4.074061585	4.594092371	4.34637E-06	0.003486726	1
TraesCS1D02G341100.1	50.44817841	18.99418758	1.921288457	9.886171707	4.77957E-23	6.84687E-19	1
TraesCS2A02G157100.1	19.93982278	18.01757728	3.729259108	4.831409338	1.3557E-06	0.001270518	1
TraesCS2A02G223000.4	34.36863013	9.512537899	2.401805353	3.960578191	7.47685E-05	0.0373013	1
TraesCS2A02G300100.1	23.73646516	7.536050941	1.763368	4.273668879	1.92283E-05	0.01182915	1
TraesCS2A02G327000.1	25.68323675	19.24995659	3.029289802	6.354610435	2.08955E-10	3.95348E-07	1
TraesCS2A02G327000.5	70.71659564	19.94569013	2.485546363	8.024670324	1.01799E-15	4.861E-12	1
TraesCS2B02G158500.2	75.47038517	16.92964387	2.626096714	6.446694741	1.14316E-10	2.33944E-07	1
TraesCS2B02G303300.2	52.63235366	18.60230167	3.783293634	4.916959524	8.78987E-07	0.000864139	1
TraesCS2B02G318500.3	40.83222758	8.089526785	2.072410597	3.903438245	9.48358E-05	0.044438529	1
TraesCS2B02G321700.1	13.09486947	3.81102546	0.88607219	4.301032697	1.70004E-05	0.010858273	1
TraesCS2B02G355000.2	30.35349241	19.18175914	2.658769972	7.214523764	5.41231E-13	1.50758E-09	1
TraesCS2B02G369400.3	25.92372805	18.89260135	3.716835885	5.082979699	3.71559E-07	0.000404988	1
TraesCS2B02G478700.1	50.33840656	8.72351431	1.516771219	5.751371204	8.85225E-09	1.36566E-05	1
TraesCS2B02G520800.1	21.83315144	19.25264229	3.530046552	5.45393439	4.92674E-08	6.76765E-05	1
TraesCS2D02G117500.1	15.08618544	18.32494374	4.201772356	4.361241444	1.29327E-05	0.008703677	1
TraesCS2D02G282800.4	25.58909515	14.69729517	2.956404133	4.971341707	6.64911E-07	0.00068036	1
TraesCS2D02G335900.5	36.84256869	19.08443664	3.611862636	5.283821276	1.26517E-07	0.000154716	1
TraesCS2D02G387600.2	9.868231851	16.76779337	3.069743589	5.462278162	4.70063E-08	6.54673E-05	1
TraesCS2D02G456900.1	208.9329869	2.491207199	0.624736854	3.987610437	6.67421E-05	0.033973104	1
TraesCS2D02G508800.3	29.53932511	19.99309443	2.646871261	7.553482002	4.23773E-14	1.47109E-10	1
TraesCS2D02G523400.2	49.01167023	8.650268638	1.684219669	5.136069123	2.80545E-07	0.00032359	1
TraesCS3A02G007200.1	18.63207046	3.003082562	0.679921296	4.41680909	1.00169E-05	0.007073669	1
TraesCS3A02G079200.3	20.81387617	18.88206816	3.152525816	5.98950469	2.10481E-09	3.35022E-06	1
TraesCS3A02G190300.7	46.5625773	7.61634868	1.911561823	3.984359066	6.76625E-05	0.034267638	1
TraesCS3A02G199100.3	60.90682965	19.64362727	2.119439181	9.268313737	1.89112E-20	1.72396E-16	1
TraesCS3A02G369700.1	7.986751229	6.677985438	1.595497859	4.185518268	2.84516E-05	0.016684462	1
TraesCS3A02G423200.1	34.19326779	18.90207591	2.336096608	8.091307458	5.90276E-16	2.95956E-12	1
TraesCS3A02G433400.1	43.94552787	8.797891044	1.905149041	4.617954214	3.87542E-06	0.003247022	1
TraesCS3B02G107500.2	17.73348712	5.944079734	1.412018179	4.209634	2.55785E-05	0.015267454	1
TraesCS3B02G220000.2	42.58383073	16.52995801	2.163755859	7.639474637	2.1811E-14	8.41208E-11	1
TraesCS3B02G242600.1	15.95203617	18.82253237	4.825814146	3.900384848	9.60399E-05	0.044793455	1
TraesCS3B02G268300.1	23.14050902	2.222547352	0.573602447	3.874717349	0.000106749	0.0484363	1
TraesCS3B02G272400.4	33.02398018	17.98744794	4.380594777	4.106165683	4.02281E-05	0.022656642	1
TraesCS3B02G337600.2	50.29468033	19.07137535	2.943779599	6.478533703	9.26182E-11	2.01902E-07	1
TraesCS3B02G370800.2	95.14057821	10.21235721	2.550710549	4.003730337	6.23514E-05	0.032228942	1
TraesCS3D02G124600.3	43.59938576	18.04240698	2.922836048	6.172911066	6.70439E-10	1.17947E-06	1
TraesCS3D02G196800.5	22.23128558	18.22133549	2.991355465	6.091330735	1.11976E-09	1.90315E-06	1
TraesCS3D02G214100.3	21.13708508	19.03981615	3.840487154	4.957656513	7.13486E-07	0.000715462	1
TraesCS3D02G258000.3	20.75140922	17.87066379	4.39606044	4.065154253	4.80007E-05	0.026593186	1
TraesCS3D02G289100.3	27.08231768	19.81764458	4.234885407	4.679617671	2.8741E-06	0.002528127	1
TraesCS3D02G426700.3	33.19254034	19.05949651	3.557362853	5.357760032	8.426E-08	0.000106954	1
TraesCS3D02G442000.3	18.66800094	17.863884	2.937664251	6.080982193	1.19449E-09	1.99632E-06	1
TraesCS3D02G474200.1	8.525805976	5.208452458	1.220544682	4.267318136	1.97837E-05	0.012096643	1
TraesCS4A02G004800.1	39.18613012	2.22572021	0.513526572	4.334187035	1.463E-05	0.009526299	1
TraesCS4A02G086600.2	23.57367617	16.05763112	2.661407316	6.033511303	1.60435E-09	2.59483E-06	1
TraesCS4A02G336800.2	36.20576571	19.80220019	4.926839502	4.019250105	5.83837E-05	0.03071735	1
TraesCS4B02G059500.1	62.35821496	18.94450711	1.943365686	9.748297629	1.87587E-22	2.35134E-18	1
TraesCS4B02G135800.1	1170.902603	2.430768925	0.623577972	3.898099411	9.69506E-05	0.045008876	1
TraesCS4B02G161000.2	31.32179728	19.32533233	2.45201801	7.881399015	3.23736E-15	1.41145E-11	1
TraesCS4B02G188200.2	20.79291246	17.91866308	3.774357928	4.747473192	2.05974E-06	0.001860759	1
TraesCS4B02G248700.1	104.1244532	18.92879386	3.460901668	5.469324378	4.51754E-08	6.38036E-05	1
TraesCS4B02G300200.1	207.0647221	1.817158527	0.392933501	4.624595568	3.7533E-06	0.003189573	1
TraesCS4B02G306100.2	21.45823864	17.34413222	4.426804771	3.917979925	8.92941E-05	0.042638803	1
TraesCS4D02G088200.2	57.89555503	20.23825186	2.383913352	8.489508161	2.07513E-17	1.38726E-13	1
TraesCS4D02G153200.3	15.88121079	19.09419749	4.260342327	4.48184583	7.40002E-06	0.00561967	1
TraesCS4D02G159500.1	217.5808769	23.29433794	4.276693365	5.44681041	5.12811E-08	6.94907E-05	1
TraesCS4D02G270600.1	35.61640663	8.100374259	2.09032616	3.875172408	0.000106549	0.0484363	1
TraesCS4D02G341600.1	156.4248162	21.02014588	3.897516647	5.393215163	6.9208E-08	9.03993E-05	1
TraesCS5A02G107600.2	35.48995613	17.42719141	4.429318752	3.934508305	8.33672E-05	0.040581609	1
TraesCS5A02G109300.1	774.377902	6.984905977	1.036158442	6.741156266	1.57131E-11	3.66433E-08	1
TraesCS5A02G126700.2	26.30116335	7.989082273	1.627021033	4.910251381	9.09597E-07	0.00088555	1
TraesCS5A02G168400.5	37.19202099	20.68356814	3.288624357	6.289428617	3.18637E-10	5.91702E-07	1
TraesCS5A02G251390.1	135.7979902	19.38462668	2.155988222	8.991063346	2.4485E-19	1.75377E-15	1
TraesCS5A02G532000.1	648.848108	4.240139439	1.048462299	4.044150605	5.25132E-05	0.028618814	1
TraesCS5B02G064100.2	33.39106821	21.63164711	4.291934879	5.040068807	4.65365E-07	0.00049644	1
TraesCS5B02G093600.1	69.66362032	20.10572328	2.704019744	7.43549426	1.04178E-13	3.26457E-10	1
TraesCS5B02G113800.1	381.7581604	7.150415221	1.122458385	6.370316546	1.88638E-10	3.63771E-07	1
TraesCS5B02G392500.2	22.01696014	15.40740071	2.505458971	6.149532237	7.77118E-10	1.34357E-06	1
TraesCS5B02G394200.2	20.5224788	18.66069976	2.50338913	7.45417464	9.04321E-14	2.92525E-10	1
TraesCS5B02G405200.1	28.36603568	18.33477903	2.662071178	6.88741127	5.68168E-12	1.38961E-08	1
TraesCS5B02G424400.2	31.81829894	18.56317309	4.038745232	4.596272363	4.30116E-06	0.003478289	1
TraesCS5B02G444600.1	120.3850308	5.783565758	1.331150754	4.344786449	1.39411E-05	0.00915657	1
TraesCS5B02G549500.1	95.26185209	5.426843108	1.318466496	4.116026553	3.8546E-05	0.021961798	1
TraesCS5D02G023700.1	2239.926209	16.52031673	2.249288725	7.34468481	2.06245E-13	6.08282E-10	1
TraesCS5D02G044100.2	295.6083599	22.52646475	2.39223754	9.416483263	4.66449E-21	4.67741E-17	1
TraesCS5D02G047700.2	20.23237015	19.40081024	4.247162011	4.56794683	4.92525E-06	0.003888891	1
TraesCS5D02G071300.1	44.65579134	7.744899219	1.838339175	4.212987095	2.52015E-05	0.015132548	1
TraesCS5D02G116900.1	60.75161864	19.63908804	1.87299104	10.48541484	1.00802E-25	2.02163E-21	1
TraesCS5D02G121500.1	876.5970198	5.399658048	0.960139603	5.623825987	1.86774E-08	2.75428E-05	1
TraesCS5D02G268500.1	130.004293	2.974142515	0.744568006	3.994453821	6.48436E-05	0.033345218	1
TraesCS5D02G273400.1	75.27892425	2.59800977	0.553094584	4.697225117	2.6372E-06	0.002361163	1
TraesCS5D02G432900.2	417.2152019	4.451719762	1.041650638	4.273716731	1.92241E-05	0.01182915	1
TraesCS5D02G508500.4	17.03539932	19.23500573	4.620965732	4.162551045	3.14712E-05	0.018347879	1
TraesCS6A02G032600.1	45.35570897	9.028128768	2.19673191	4.109799984	3.96002E-05	0.022434966	1
TraesCS6A02G144800.2	27.31649037	17.87259623	4.133807052	4.3235197	1.53559E-05	0.009934502	1
TraesCS6A02G176900.8	41.30374778	18.99540521	1.750957729	10.84858012	2.02547E-27	6.77028E-23	1
TraesCS6A02G180900.2	60.93394271	4.041810766	1.034015152	3.908850619	9.27363E-05	0.043658761	1
TraesCS6A02G227900.1	942.6313132	1.22674775	0.29198453	4.201413518	2.65254E-05	0.015738954	1
TraesCS6A02G279100.1	14.84671921	17.59431781	3.690076716	4.768008678	1.86056E-06	0.001696101	1
TraesCS6B02G036900.1	72.32588198	20.2662639	2.463703838	8.225933485	1.93676E-16	1.21383E-12	1
TraesCS6B02G219800.1	25.04738193	19.86057258	3.534439648	5.619157365	1.91891E-08	2.78873E-05	1
TraesCS6B02G264000.2	52.83830987	18.57684494	2.984169783	6.225130033	4.81157E-10	8.61589E-07	1
TraesCS6B02G314700.1	168.1739127	9.357693355	1.284091691	7.287402776	3.15987E-13	9.05321E-10	1
TraesCS6D02G082300.2	42.43333241	17.43676112	3.487094345	5.000369764	5.72205E-07	0.000597698	1
TraesCS6D02G085300.1	164.9894503	20.5636739	3.813258008	5.392678349	6.94151E-08	9.03993E-05	1
TraesCS6D02G103500.1	5.40991003	13.9898028	2.178324485	6.422276798	1.34251E-10	2.69246E-07	1
TraesCS6D02G127600.2	33.78121592	17.83142204	2.171198059	8.212710936	2.1625E-16	1.24601E-12	1
TraesCS6D02G161200.2	96.36713926	15.26760477	2.879915775	5.301406696	1.14914E-07	0.000142262	1
TraesCS6D02G184500.1	44.41682982	19.0158118	2.643571377	7.193228056	6.32771E-13	1.71493E-09	1
TraesCS6D02G184600.1	63.69861715	17.87971192	1.666344734	10.72989974	7.36761E-27	1.847E-22	1
TraesCS6D02G213900.2	17.76074463	16.75478181	3.287163147	5.097033845	3.45017E-07	0.000384414	1
TraesCS6D02G258000.2	23.88542367	19.37812219	3.210587062	6.035694351	1.58281E-09	2.59483E-06	1
TraesCS6D02G273100.1	31.48184472	18.84552969	2.781662529	6.774915898	1.24479E-11	2.97199E-08	1
TraesCS7A02G215200.2	129.1365702	7.324867769	1.805947247	4.055969952	4.99267E-05	0.02735791	1
TraesCS7A02G246000.1	87.42259819	2.300190443	0.523357849	4.395062477	1.10741E-05	0.007622931	1
TraesCS7A02G253000.4	23.35511696	20.28288937	2.938638754	6.902137714	5.12257E-12	1.28419E-08	1
TraesCS7A02G326600.2	63.86313134	11.32141704	2.49749916	4.533101441	5.81239E-06	0.004483453	1
TraesCS7A02G461700.4	9.941831933	18.27623138	3.667811745	4.982870618	6.26478E-07	0.000647643	1
TraesCS7A02G552400.2	70.7596444	18.16198781	3.662075866	4.959478852	7.06825E-07	0.000715462	1
TraesCS7B02G071400.1	29.18148226	19.89872321	4.377534821	4.545645901	5.4767E-06	0.00426632	1
TraesCS7B02G145500.1	106.3326552	2.816974057	0.555464377	5.071385624	3.9493E-07	0.000425832	1
TraesCS7B02G168000.3	84.90590577	16.64584657	3.259694691	5.106566149	3.28066E-07	0.000373835	1
TraesCS7B02G186300.2	16.10989786	18.040523	3.512607622	5.135934595	2.80745E-07	0.00032359	1
TraesCS7B02G206400.2	32.73026191	18.56210594	3.4642233	5.358230209	8.40411E-08	0.000106954	1
TraesCS7B02G253600.2	83.26218522	16.12678944	3.644069251	4.42548929	9.62239E-06	0.006843296	1
TraesCS7B02G319800.2	8.234516551	18.89185932	4.252624699	4.44239985	8.8961E-06	0.006371962	1
TraesCS7D02G194500.2	13.41010965	16.75980555	3.830482444	4.3753772	1.21223E-05	0.008213409	1
TraesCS7D02G217100.5	33.25786601	8.03271576	1.990675886	4.035170073	5.45628E-05	0.029575081	1
TraesCS7D02G244500.1	126.9022635	3.023126952	0.676738164	4.467203287	7.92488E-06	0.00584326	1
TraesCS7D02G289400.1	155.0352174	20.39110756	2.110033011	9.663880829	4.29286E-22	4.78306E-18	1
TraesCS7D02G336600.3	8.807541881	19.36849381	4.828371911	4.011392281	6.03617E-05	0.031362134	1
TraesCS7D02G380700.1	86.67959444	19.33313493	3.642405874	5.307792597	1.10961E-07	0.000139085	1
TraesCS7D02G388400.3	33.83126385	17.95352339	3.136347621	5.724341037	1.03836E-08	1.57763E-05	1
TraesCS7D02G396300.1	9.53260627	4.772987592	1.216201542	3.924503816	8.69087E-05	0.041898759	1
TraesCS7D02G460500.1	533.9097617	14.19183307	3.08461342	4.60084657	4.20777E-06	0.003450619	1
TraesCS7D02G538400.1	141.421344	21.91828267	2.383800604	9.194679555	3.76114E-20	3.14296E-16	1
TraesCSU02G034700.3	250.6163438	3.304933493	0.585259111	5.646957789	1.63312E-08	2.44424E-05	1
TraesCSU02G036800.1	10.66435735	8.334328181	2.003832939	4.159193123	3.19374E-05	0.018512049	1
TraesCS1A02G093900.1	101.0127972	48.24640508	6.558606496	7.356197555	1.89223E-13	1.67918E-10	4
TraesCS1A02G136400.1	43.56070876	22.51023058	3.245887761	6.934999681	4.06222E-12	2.90962E-09	4
TraesCS1A02G158900.2	52.86762363	22.93310187	3.650683434	6.281865378	3.34534E-10	1.84319E-07	4
TraesCS1A02G174000.3	181.2445309	11.38432207	2.709665666	4.201375179	2.65299E-05	0.006425927	4
TraesCS1A02G183800.2	94.01256444	37.38783011	6.562722775	5.696999766	1.21934E-08	5.53266E-06	4
TraesCS1A02G204200.3	28.21618431	20.8671328	4.693445367	4.446015914	8.74775E-06	0.002339194	4
TraesCS1A02G207700.1	8.277625413	33.06984617	6.570735868	5.032898421	4.83119E-07	0.0001688	4
TraesCS1A02G232500.1	58.98578266	3.891282203	0.944133003	4.121540281	3.76348E-05	0.008838176	4
TraesCS1A02G259500.2	16.19749963	36.36188257	6.154197369	5.908468706	3.45302E-09	1.66471E-06	4
TraesCS1A02G260900.2	133.9079544	24.84517529	6.558602419	3.788181338	0.000151754	0.028820915	4
TraesCS1A02G278100.1	17.99601653	36.08756993	6.55917293	5.501847614	3.75832E-08	1.60255E-05	4
TraesCS1A02G288900.2	48.84650005	8.517980801	1.951515877	4.364802205	1.27238E-05	0.003331339	4
TraesCS1A02G296300.2	16.16022174	24.70252585	6.563639783	3.763540759	0.000167524	0.03139971	4
TraesCS1A02G329200.1	35.24771499	29.32765813	6.563209287	4.468493514	7.87724E-06	0.002129127	4
TraesCS1A02G343000.2	676.4281015	26.79750618	2.187747871	12.24890059	1.70289E-34	1.7076E-30	4
TraesCS1A02G348900.1	19.0199439	7.698923139	1.410193517	5.459479885	4.77531E-08	1.97059E-05	4
TraesCS1A02G350400.1	28.91160302	48.20874523	3.2987425	14.6142796	2.27751E-48	7.61272E-44	4
TraesCS1B02G019800.1	36.54710804	4.28025228	1.013304426	4.22405367	2.39947E-05	0.005911831	4
TraesCS1B02G107000.4	89.26792126	21.5962932	3.26230202	6.619955192	3.59308E-11	2.25433E-08	4
TraesCS1B02G146400.1	40.13787212	23.05501808	3.763733946	6.125570621	9.03592E-10	4.67059E-07	4
TraesCS1B02G156800.1	58.35687434	23.87341772	6.081401508	3.925644063	8.6498E-05	0.018415622	4
TraesCS1B02G164200.1	265.2182967	4.756821035	1.155243268	4.117592518	3.82851E-05	0.008948982	4
TraesCS1B02G165600.2	22.88845426	34.60124501	6.300811778	5.491553506	3.98414E-08	1.67864E-05	4
TraesCS1B02G285100.1	38.54085558	6.97724053	1.891307346	3.689109834	0.00022504	0.040082312	4
TraesCS1B02G298000.2	47.93258898	21.97676993	3.319856376	6.61979539	3.59696E-11	2.25433E-08	4
TraesCS1B02G343900.1	47.97987779	22.19305946	5.253119136	4.224739414	2.39217E-05	0.005908376	4
TraesCS1B02G368500.2	60.20183629	9.523813507	2.113986679	4.505143577	6.63281E-06	0.001817597	4
TraesCS1B02G411700.1	126.9396788	24.92320824	3.95902209	6.295294058	3.06818E-10	1.69982E-07	4
TraesCS1D02G011700.1	287.5468774	26.92662125	3.463040563	7.775427622	7.5193E-15	8.66681E-12	4
TraesCS1D02G052700.1	66.17512125	5.184902938	1.329495704	3.899901988	9.62316E-05	0.020181213	4
TraesCS1D02G066700.5	11.09812741	36.0306588	6.205798932	5.805966193	6.39959E-09	3.01282E-06	4
TraesCS1D02G066700.10	54.55526099	23.64529354	3.019740994	7.830238947	4.86944E-15	5.67782E-12	4
TraesCS1D02G099600.4	103.2525354	23.54006933	2.412940374	9.755760891	1.74289E-22	4.72355E-19	4
TraesCS1D02G111500.2	16.5799716	45.45705287	4.279837447	10.62121013	2.37463E-26	1.25326E-22	4
TraesCS1D02G115900.1	34.67201684	22.84592919	3.067837614	7.446916058	9.55474E-14	8.87148E-11	4
TraesCS1D02G123600.2	87.34018982	19.94406965	3.728369165	5.34927438	8.83076E-08	3.48631E-05	4
TraesCS1D02G136800.3	10.66321129	31.20334429	6.559641037	4.756867657	1.9662E-06	0.000601112	4
TraesCS1D02G144600.1	114.4991845	5.237129076	1.242519344	4.214927598	2.49858E-05	0.006110986	4
TraesCS1D02G156100.2	40.91861631	23.10509581	3.861948852	5.98275552	2.19394E-09	1.07318E-06	4
TraesCS1D02G245900.1	160.8059507	10.67522008	2.304456756	4.632423692	3.6141E-06	0.001044411	4
TraesCS1D02G246200.3	68.22910407	31.0246332	6.559403815	4.72979467	2.24747E-06	0.000674759	4
TraesCS1D02G287900.2	47.91688682	22.4699406	2.345935081	9.57824485	9.8708E-22	2.41418E-18	4
TraesCS1D02G346200.2	152.1019557	23.58310017	3.055189334	7.719030671	1.17218E-14	1.30603E-11	4
TraesCS1D02G376900.3	12.47530865	24.84615353	6.426729095	3.866065173	0.000110605	0.022580404	4
TraesCS1D02G393000.1	171.5453289	25.46859936	4.100261574	6.211457219	5.24955E-10	2.77057E-07	4
TraesCS1D02G411700.4	134.7489642	24.37640655	3.477771278	7.009203481	2.39679E-12	1.7936E-09	4
TraesCS1D02G426400.1	22.02792316	22.91976984	3.518253245	6.514531002	7.29171E-11	4.32657E-08	4
TraesCS1D02G432800.1	22.61718352	8.027728216	2.17882136	3.684436165	0.000229209	0.040608546	4
TraesCS2A02G012200.2	45.94716013	22.24055402	4.400948923	5.053581491	4.33601E-07	0.00015364	4
TraesCS2A02G027700.1	27.20987012	7.795150076	2.004640769	3.888552102	0.000100844	0.020893257	4
TraesCS2A02G027800.1	283.2708348	4.106567233	1.049958855	3.911169673	9.18502E-05	0.019431359	4
TraesCS2A02G037800.1	36.76052388	31.62540631	6.559006071	4.821676633	1.42357E-06	0.000446097	4
TraesCS2A02G087000.1	35.84017387	20.52518448	4.059496904	5.056090684	4.27938E-07	0.000152713	4
TraesCS2A02G109500.1	30.1478274	8.487688855	2.189641213	3.876292063	0.00010606	0.021838635	4
TraesCS2A02G211700.5	18.06789848	21.38047804	3.037430402	7.039001791	1.93622E-12	1.51686E-09	4
TraesCS2A02G213900.1	44.93910019	22.28135449	2.931685321	7.600186259	2.95705E-14	2.99519E-11	4
TraesCS2A02G220900.1	26.12953113	41.74827709	5.793202439	7.20642469	5.74401E-13	4.76026E-10	4
TraesCS2A02G220900.4	83.93814055	10.07764989	2.072319661	4.862980399	1.15631E-06	0.000366935	4
TraesCS2A02G223000.7	12.1905573	46.86720234	6.04041943	7.75893179	8.56477E-15	9.64999E-12	4
TraesCS2A02G228300.3	35.22443664	8.890655249	1.869769993	4.754945947	1.985E-06	0.000605013	4
TraesCS2A02G274900.1	159.8466726	7.999240251	1.837181672	4.354082329	1.33625E-05	0.003489469	4
TraesCS2A02G287900.3	102.3912817	10.11016336	2.561975492	3.946237343	7.93889E-05	0.017194131	4
TraesCS2A02G315700.1	67.75804494	5.060810607	1.240030284	4.081199203	4.48039E-05	0.010281016	4
TraesCS2A02G349200.1	30.49364414	20.68171958	3.347143094	6.178917062	6.45428E-10	3.37092E-07	4
TraesCS2A02G357800.3	51.4795914	9.471911782	2.402468032	3.942575575	8.06112E-05	0.017421235	4
TraesCS2A02G380800.1	167.2737006	3.982768469	1.029493089	3.868669455	0.000109431	0.022394693	4
TraesCS2A02G403100.2	13.42688275	22.90101962	6.097567537	3.755763176	0.000172814	0.032150788	4
TraesCS2A02G421300.2	104.6160664	22.14488179	1.858620281	11.91468855	9.92363E-33	7.10794E-29	4
TraesCS2A02G430100.5	253.048696	25.60184716	2.611845485	9.802205876	1.10153E-22	3.15596E-19	4
TraesCS2A02G459800.1	154.3240239	34.79874701	3.968243851	8.769306604	1.7977E-18	3.33829E-15	4
TraesCS2A02G466700.2	12.19429827	6.965880472	1.904985941	3.656657155	0.000255526	0.044026389	4
TraesCS2A02G496100.4	24.65144394	23.50483745	2.976586965	7.896573399	2.86675E-15	3.49501E-12	4
TraesCS2A02G565400.1	83.46294728	3.925889061	1.067113764	3.678978936	0.00023417	0.041268586	4
TraesCS2B02G005300.2	64.94036428	23.07286585	2.711420778	8.509511339	1.74668E-17	2.9192E-14	4
TraesCS2B02G008300.1	18.44419706	9.070230939	1.849537527	4.904053477	9.38789E-07	0.000306642	4
TraesCS2B02G010500.1	139.9425765	4.852399878	1.242124275	3.906533327	9.36297E-05	0.019724599	4
TraesCS2B02G063900.2	40.45816071	23.16665808	2.983423315	7.765126041	8.15641E-15	9.29432E-12	4
TraesCS2B02G097800.1	653.3447443	4.053368353	1.085470942	3.734202543	0.000188311	0.034584712	4
TraesCS2B02G110800.2	34.74398562	23.92596781	4.522735636	5.290153953	1.22213E-07	4.69548E-05	4
TraesCS2B02G132900.1	32.78869149	23.61524785	2.946830077	8.013779973	1.11236E-15	1.44862E-12	4
TraesCS2B02G149000.2	65.92719062	23.5712946	5.204723702	4.528827264	5.9312E-06	0.00165672	4
TraesCS2B02G185800.2	11.73772746	25.22185808	5.88236296	4.287708571	1.80526E-05	0.004594563	4
TraesCS2B02G221600.3	71.496136	24.23623722	3.657203797	6.626985686	3.42611E-11	2.18223E-08	4
TraesCS2B02G224000.1	80.02760459	5.644173145	1.231768113	4.582171827	4.60172E-06	0.001314662	4
TraesCS2B02G255100.3	40.55350663	22.20263178	4.768650529	4.655956993	3.22479E-06	0.000942777	4
TraesCS2B02G259100.1	51.26612815	43.70119611	6.559014976	6.662768155	2.68717E-11	1.76119E-08	4
TraesCS2B02G264200.1	186.1457776	24.08484526	2.513085633	9.583774206	9.3562E-22	2.34553E-18	4
TraesCS2B02G295400.2	83.72998259	9.741605073	2.170616295	4.48794432	7.19137E-06	0.00195428	4
TraesCS2B02G302800.2	101.5823296	9.799319747	2.172721072	4.510160035	6.47787E-06	0.001789481	4
TraesCS2B02G309500.1	91.76388972	22.65002358	3.037051722	7.457898533	8.79133E-14	8.39589E-11	4
TraesCS2B02G328900.2	37.55089663	24.84025776	3.707862847	6.699346439	2.09354E-11	1.41847E-08	4
TraesCS2B02G354400.3	97.51581121	23.86032176	4.886578456	4.882827929	1.04575E-06	0.000336305	4
TraesCS2B02G357600.1	126.4116749	3.375192457	0.86567265	3.898924676	9.66208E-05	0.020185096	4
TraesCS2B02G369400.3	25.92372805	45.16840635	3.71947066	12.14377273	6.19045E-34	5.3284E-30	4
TraesCS2B02G398000.1	94.16273419	36.06455129	5.592198438	6.449082893	1.12529E-10	6.59887E-08	4
TraesCS2B02G445200.1	394.9279563	5.351890655	1.238723793	4.320487494	1.55685E-05	0.004013268	4
TraesCS2B02G445300.1	987.2411604	3.219960605	0.779833186	4.129037673	3.64285E-05	0.008595148	4
TraesCS2B02G445500.1	657.7983255	4.181963504	1.057315876	3.955264079	7.64502E-05	0.016701944	4
TraesCS2B02G445600.1	688.0816259	3.764395187	0.992538564	3.792694132	0.000149022	0.028463706	4
TraesCS2B02G449100.2	24.01851675	22.95179175	3.417015043	6.716912701	1.85615E-11	1.26619E-08	4
TraesCS2B02G495700.2	100.2531318	24.09251204	3.417887591	7.048948041	1.80275E-12	1.42342E-09	4
TraesCS2B02G525400.1	10.86323852	6.4181548	1.751106259	3.66520008	0.000247145	0.043100849	4
TraesCS2B02G526200.4	19.58124014	47.30339333	5.271646733	8.97317209	2.88095E-19	5.89579E-16	4
TraesCS2B02G545600.1	194.9599351	23.84888801	3.999777809	5.962553209	2.48327E-09	1.20297E-06	4
TraesCS2B02G563400.1	21.39709763	5.805083425	1.583655859	3.66562179	0.000246738	0.043100849	4
TraesCS2D02G006500.1	526.1785916	4.751831463	1.044384461	4.549887174	5.36747E-06	0.001520434	4
TraesCS2D02G013400.1	38.54298272	21.92707489	2.464277945	8.897971487	5.68766E-19	1.11832E-15	4
TraesCS2D02G017400.1	64.27377777	5.713826491	1.31986066	4.329113417	1.49711E-05	0.003869214	4
TraesCS2D02G017500.1	162.3885455	5.284145839	1.281186507	4.124415773	3.71677E-05	0.008748979	4
TraesCS2D02G029500.1	9.128822535	6.457517183	1.772367614	3.643441198	0.000269017	0.0459561	4
TraesCS2D02G029600.1	184.8332109	4.688589457	1.151580778	4.071437753	4.67238E-05	0.010672728	4
TraesCS2D02G039600.4	133.0062904	24.9826863	3.309647231	7.548443853	4.4049E-14	4.33049E-11	4
TraesCS2D02G081400.1	504.2003586	4.235853659	1.112737937	3.806694746	0.000140836	0.027211275	4
TraesCS2D02G084300.2	61.23988212	21.3884634	3.84983146	5.555688247	2.7652E-08	1.18498E-05	4
TraesCS2D02G114500.2	64.76915679	34.73462909	6.559067006	5.295666146	1.18583E-07	4.57353E-05	4
TraesCS2D02G117800.1	31.51713382	22.30916406	2.947587884	7.568617101	3.77218E-14	3.74518E-11	4
TraesCS2D02G129600.2	64.29756565	23.5012311	4.022284517	5.842757021	5.13439E-09	2.4401E-06	4
TraesCS2D02G135000.2	152.7385775	24.64249585	4.366736308	5.643229661	1.66889E-08	7.33999E-06	4
TraesCS2D02G225200.1	26.38273268	22.61270611	5.745160207	3.935957448	8.28657E-05	0.017793403	4
TraesCS2D02G234500.1	143.6960584	24.06440777	4.236174574	5.680693122	1.3415E-08	6.03236E-06	4
TraesCS2D02G234500.2	80.4892449	22.79670024	4.576614897	4.981127046	6.3215E-07	0.000214882	4
TraesCS2D02G252600.1	1010.492192	2.792442408	0.755959834	3.693903145	0.000220838	0.039509319	4
TraesCS2D02G267600.1	49.88234541	23.45250389	4.205312865	5.576874929	2.44878E-08	1.06764E-05	4
TraesCS2D02G286200.8	30.35818847	29.73311125	6.559364012	4.532925936	5.81722E-06	0.001633987	4
TraesCS2D02G295500.1	181.5495188	24.76822089	6.102869547	4.058454911	4.93985E-05	0.011207082	4
TraesCS2D02G296800.2	56.451766	23.34058817	4.081107281	5.719180254	1.07039E-08	4.94635E-06	4
TraesCS2D02G335300.2	280.5557721	25.83191672	3.355767558	7.697766985	1.38465E-14	1.50922E-11	4
TraesCS2D02G335900.2	140.7424749	23.59939524	2.21976608	10.63147845	2.12713E-26	1.18501E-22	4
TraesCS2D02G355700.2	46.79341223	23.63304668	3.556464657	6.645095328	3.03021E-11	1.96039E-08	4
TraesCS2D02G361100.2	24.43757467	35.91443351	5.112225866	7.025204764	2.13753E-12	1.62382E-09	4
TraesCS2D02G387600.2	9.868231851	44.79142031	3.089216022	14.49928396	1.2242E-47	2.45519E-43	4
TraesCS2D02G400400.2	68.68215688	21.0469378	2.768648087	7.601882631	2.91853E-14	2.98635E-11	4
TraesCS2D02G401200.2	20.62062929	7.733191784	2.014496135	3.838772211	0.000123651	0.024510162	4
TraesCS2D02G433100.2	47.78996444	17.13736171	3.408810902	5.027372361	4.97246E-07	0.000173133	4
TraesCS2D02G458300.1	37.01885943	26.50782482	6.603554004	4.014175518	5.96539E-05	0.013412374	4
TraesCS2D02G497300.1	34.6928199	8.57425558	1.838352658	4.664097251	3.09975E-06	0.00090887	4
TraesCS2D02G534600.2	377.0695788	25.42264242	2.886942117	8.806079718	1.29599E-18	2.45204E-15	4
TraesCS2D02G548100.1	50.33462041	5.368367906	1.382857776	3.882082453	0.000103566	0.021412912	4
TraesCS2D02G549200.2	33.04927435	35.96780315	6.558755741	5.483936979	4.15963E-08	1.73798E-05	4
TraesCS2D02G553000.2	99.32642478	23.79501937	4.269013585	5.573891695	2.49111E-08	1.07673E-05	4
TraesCS2D02G587800.2	23.85657825	40.46879354	5.991252649	6.754646467	1.43184E-11	9.90211E-09	4
TraesCS3A02G036600.2	270.1028458	10.52763007	1.416509375	7.432093468	1.06892E-13	9.83379E-11	4
TraesCS3A02G055600.2	98.40920876	24.98591272	5.240768122	4.767605079	1.86429E-06	0.000573451	4
TraesCS3A02G061600.1	1265.000421	6.343943647	1.494019391	4.246225774	2.17402E-05	0.005409523	4
TraesCS3A02G192400.2	99.26411211	23.10711944	4.786946432	4.827110512	1.38528E-06	0.00043683	4
TraesCS3A02G193200.1	109.5671352	8.391301801	2.100873197	3.994197181	6.49138E-05	0.014433179	4
TraesCS3A02G199400.13	20.95037608	22.92719852	3.362864198	6.817759258	9.24714E-12	6.48445E-09	4
TraesCS3A02G201000.3	90.66006029	24.37210415	3.258144956	7.480362132	7.41181E-14	7.14648E-11	4
TraesCS3A02G207500.1	37.65752306	35.75939273	6.559180585	5.45180793	4.98603E-08	2.04075E-05	4
TraesCS3A02G246500.1	23.61818585	22.14119621	3.881973633	5.703592632	1.17308E-08	5.34696E-06	4
TraesCS3A02G259200.2	47.19960413	22.38917032	3.951632585	5.665802637	1.46338E-08	6.49306E-06	4
TraesCS3A02G285900.2	30.06139538	21.77595121	4.894498954	4.449066475	8.62443E-06	0.002312386	4
TraesCS3A02G318300.1	86.60099132	24.55558205	3.346387317	7.33793782	2.1691E-13	1.9047E-10	4
TraesCS3A02G323100.3	118.4920062	24.10577949	5.118117644	4.709891638	2.47849E-06	0.000741896	4
TraesCS3A02G365000.2	58.5549648	22.96194737	2.491275185	9.216945403	3.05684E-20	6.96661E-17	4
TraesCS3A02G381200.2	17.11779745	6.502691435	1.771138474	3.671475456	0.000241154	0.042202834	4
TraesCS3A02G444000.1	25.41536649	28.68729032	6.571005109	4.365738551	1.26694E-05	0.003325782	4
TraesCS3A02G467300.3	24.62031422	23.38296768	4.453579967	5.25037562	1.51789E-07	5.76552E-05	4
TraesCS3A02G483000.1	1448.850454	3.783678536	1.020543134	3.707514566	0.000209303	0.037680997	4
TraesCS3A02G498200.2	32.7280709	22.30180922	3.565122308	6.255552347	3.96111E-10	2.13553E-07	4
TraesCS3A02G510900.1	135.4989889	6.145833924	1.37646529	4.464939267	8.00915E-06	0.00215896	4
TraesCS3B02G017100.2	7.981332142	33.05616803	6.559377065	5.039528556	4.6668E-07	0.000164201	4
TraesCS3B02G047300.1	391.2276756	25.22655753	2.237765676	11.27310057	1.78183E-29	1.19117E-25	4
TraesCS3B02G103500.1	8.572858698	6.201300862	1.63134084	3.801352059	0.000143909	0.027645073	4
TraesCS3B02G122900.1	7.436605538	6.618456082	1.718455466	3.851398079	0.000117445	0.023618067	4
TraesCS3B02G137100.3	29.19210596	21.45449816	2.690151582	7.975200467	1.52134E-15	1.95583E-12	4
TraesCS3B02G218800.2	17.86196801	33.77723281	5.661081113	5.966569307	2.42294E-09	1.17944E-06	4
TraesCS3B02G226300.5	82.70130368	23.82618935	4.790962827	4.973152623	6.58728E-07	0.000222815	4
TraesCS3B02G228800.3	19.88861941	21.85106218	5.060988283	4.317548462	1.57772E-05	0.004056636	4
TraesCS3B02G304600.2	33.05067662	22.81187299	4.727604252	4.825250121	1.39828E-06	0.000439545	4
TraesCS3B02G320200.2	81.07839907	23.09824423	5.957361115	3.877261053	0.000105639	0.021796628	4
TraesCS3B02G334400.1	49.42195078	17.94728872	3.077035936	5.832654898	5.45523E-09	2.58035E-06	4
TraesCS3B02G387800.1	101.551734	5.394914499	1.384221155	3.897436821	9.72162E-05	0.020267248	4
TraesCS3B02G405000.2	10.84537342	23.54103071	4.578223474	5.14195754	2.71891E-07	9.8784E-05	4
TraesCS3B02G452800.6	33.82896116	20.32869051	2.891931224	7.02945158	2.07347E-12	1.59939E-09	4
TraesCS3B02G457600.3	77.46575319	21.19184796	5.562116319	3.810033223	0.000138948	0.02700252	4
TraesCS3B02G458800.6	149.3047001	24.53673005	2.930495359	8.37289504	5.62197E-17	8.41424E-14	4
TraesCS3B02G463000.2	143.7720591	24.13431849	3.272681006	7.374479348	1.64989E-13	1.47719E-10	4
TraesCS3B02G466400.3	56.84294981	9.652167592	2.596798298	3.716949291	0.000201643	0.036447964	4
TraesCS3B02G481000.1	97.28864387	4.684316596	1.116345538	4.196117096	2.7153E-05	0.006545241	4
TraesCS3B02G526000.1	1398.090353	3.828958708	1.027578125	3.726197178	0.00019439	0.035435154	4
TraesCS3B02G529700.1	107.5487281	5.670837636	1.508948019	3.758139819	0.000171181	0.031965623	4
TraesCS3D02G061500.1	911.9679054	4.178300167	1.144519154	3.650703576	0.000261523	0.044905368	4
TraesCS3D02G061700.1	108.4899655	6.033166811	1.589725718	3.795099207	0.000147584	0.028296987	4
TraesCS3D02G061900.1	643.0622764	7.113628623	1.945975358	3.655559457	0.000256622	0.044139376	4
TraesCS3D02G078900.1	178.9983015	4.647335151	1.282731784	3.62299836	0.000291208	0.049078036	4
TraesCS3D02G108500.1	182.2342288	4.441771385	1.186940921	3.7422009	0.000182416	0.03374924	4
TraesCS3D02G113200.1	45.5323874	5.029127289	1.239070527	4.058790182	4.93276E-05	0.011207082	4
TraesCS3D02G141400.2	33.18452006	39.55817065	6.559117307	6.031020455	1.62928E-09	8.20999E-07	4
TraesCS3D02G144100.6	38.18823231	22.04712512	4.156625138	5.304092716	1.13235E-07	4.4011E-05	4
TraesCS3D02G178300.2	52.24062015	33.75609194	6.558953573	5.146566683	2.65297E-07	9.67389E-05	4
TraesCS3D02G178500.2	4.118788673	25.34410691	6.561140328	3.862759467	0.000112113	0.022757882	4
TraesCS3D02G188100.1	111.469146	26.0407594	4.938470519	5.273041379	1.34181E-07	5.13561E-05	4
TraesCS3D02G191600.2	11.79491738	33.64632141	6.559357825	5.129514551	2.9049E-07	0.000105161	4
TraesCS3D02G197700.2	23.56679473	22.65635968	5.137665326	4.409855108	1.0344E-05	0.002744083	4
TraesCS3D02G205800.1	46.16595752	9.799787201	2.28810445	4.282928255	1.8445E-05	0.004661871	4
TraesCS3D02G209200.1	167.1227355	25.51488314	6.205735158	4.111500488	3.93096E-05	0.009167091	4
TraesCS3D02G230800.2	57.87272455	9.459455127	2.361349371	4.005953225	6.17679E-05	0.013856593	4
TraesCS3D02G255900.5	27.19838277	22.04768156	3.872904418	5.692802913	1.24971E-08	5.6449E-06	4
TraesCS3D02G259300.2	51.32029694	22.56449382	3.752456711	6.013258928	1.8183E-09	9.07134E-07	4
TraesCS3D02G285500.1	117.2986461	8.013504879	2.014222329	3.978460949	6.93628E-05	0.01535429	4
TraesCS3D02G288700.2	157.199968	44.37046495	6.084121862	7.292829755	3.03512E-13	2.62373E-10	4
TraesCS3D02G292600.2	121.4446708	22.71859262	2.207896114	10.2897018	7.84189E-25	3.2765E-21	4
TraesCS3D02G298400.1	32.59079477	22.15291419	3.154708847	7.02217392	2.18442E-12	1.64697E-09	4
TraesCS3D02G306900.2	99.44096018	23.07127746	3.518988572	6.556224036	5.51873E-11	3.3744E-08	4
TraesCS3D02G318200.1	339.8860036	24.02196676	3.677291372	6.532516553	6.46736E-11	3.93047E-08	4
TraesCS3D02G391300.1	83.03108115	23.33220808	5.635798962	4.140000066	3.47306E-05	0.00823328	4
TraesCS3D02G408900.2	235.5776097	23.49502623	4.829977329	4.864417497	1.14794E-06	0.000365436	4
TraesCS3D02G423500.2	54.69404674	23.02604993	3.028811018	7.602339594	2.90824E-14	2.98635E-11	4
TraesCS3D02G438600.1	365.6889149	4.0079944	1.052302916	3.808783895	0.000139652	0.027034513	4
TraesCS3D02G463800.1	83.82239966	5.144227211	1.27114593	4.04692104	5.18957E-05	0.011720605	4
TraesCS3D02G472000.1	284.1402332	3.963917575	1.062429427	3.730993771	0.000190726	0.034900411	4
TraesCS3D02G478300.1	142.8528805	6.553430173	1.509978528	4.340081698	1.4243E-05	0.00369055	4
TraesCS3D02G485400.1	280.7484076	11.13354754	2.424571106	4.591965777	4.3909E-06	0.001258019	4
TraesCS3D02G501600.1	124.7475393	2.514129239	0.633072721	3.971311913	7.14779E-05	0.015704629	4
TraesCS3D02G506600.3	16.46203783	34.9166756	5.524261964	6.320604604	2.60542E-10	1.47607E-07	4
TraesCS3D02G527900.2	35.24398565	7.994200874	2.011502635	3.974243302	7.06034E-05	0.015560205	4
TraesCS4A02G045600.2	8.615722106	40.95816252	6.560186473	6.243444861	4.28037E-10	2.28464E-07	4
TraesCS4A02G057600.2	17.67983083	29.29681825	3.808674174	7.69213036	1.44705E-14	1.56028E-11	4
TraesCS4A02G083700.1	33.23527958	9.638839608	2.489597496	3.871645767	0.000108103	0.022213611	4
TraesCS4A02G088300.2	19.93961815	32.45897416	6.559206217	4.948613153	7.47441E-07	0.000251514	4
TraesCS4A02G130800.1	70.67059582	5.874190236	1.34021244	4.383029183	1.1704E-05	0.003096692	4
TraesCS4A02G137900.3	85.47599171	9.195412163	2.161519843	4.254141915	2.09852E-05	0.005260837	4
TraesCS4A02G139300.9	30.55929232	21.32313744	3.627480162	5.878223034	4.14694E-09	1.9802E-06	4
TraesCS4A02G143000.5	92.72645879	35.98943025	5.452635088	6.600373888	4.10122E-11	2.53863E-08	4
TraesCS4A02G149700.3	78.58291274	23.28567624	5.356390744	4.347269898	1.37843E-05	0.003580943	4
TraesCS4A02G169300.2	49.7038387	24.14919756	6.558759783	3.681976221	0.000231433	0.040871718	4
TraesCS4A02G204100.2	27.99342384	44.32560479	5.382490629	8.235147601	1.79336E-16	2.56905E-13	4
TraesCS4A02G243100.1	18.07181177	19.73856127	4.715487949	4.185900057	2.84038E-05	0.006830338	4
TraesCS4A02G243100.2	81.18915231	47.08431388	6.559321704	7.178229092	7.06202E-13	5.75738E-10	4
TraesCS4A02G246300.2	74.15406754	23.84892468	6.052899235	3.940082884	8.14535E-05	0.017565395	4
TraesCS4A02G259600.1	190.3564204	3.455337669	0.842416483	4.101697603	4.1013E-05	0.009508606	4
TraesCS4A02G279100.1	57.60274533	3.705272031	0.944543829	3.922816408	8.75198E-05	0.018554392	4
TraesCS4A02G294100.3	204.2345918	26.37739331	4.863480562	5.423563018	5.84226E-08	2.34338E-05	4
TraesCS4A02G320000.1	75.90378006	23.23947469	3.059683865	7.595384268	3.0688E-14	3.0773E-11	4
TraesCS4A02G323400.1	64.47034134	4.310132376	1.166894946	3.693676447	0.000221035	0.039509319	4
TraesCS4A02G331100.1	703.4158408	5.692995852	1.440824628	3.951206652	7.77581E-05	0.016877388	4
TraesCS4A02G336800.2	36.20576571	41.86386022	4.927195948	8.496487791	1.95413E-17	3.21237E-14	4
TraesCS4A02G398400.1	16.32620616	7.356558868	1.576369648	4.666772718	3.05967E-06	0.000899751	4
TraesCS4A02G401300.1	292.5750762	4.251666295	1.170579981	3.632102346	0.000281122	0.047698864	4
TraesCS4B02G033100.1	18.19637574	6.990879275	1.828058322	3.824210197	0.000131192	0.025732745	4
TraesCS4B02G037700.2	25.45954878	21.23635741	3.51042931	6.049504357	1.45292E-09	7.39566E-07	4
TraesCS4B02G037900.2	42.8736395	35.80350606	6.56520246	5.453526571	4.93806E-08	2.0294E-05	4
TraesCS4B02G046600.1	47.20347826	26.93482932	6.558762132	4.106694035	4.01362E-05	0.009338146	4
TraesCS4B02G050500.2	380.1200412	24.61333112	2.774528881	8.871174956	7.23781E-19	1.39574E-15	4
TraesCS4B02G062300.1	77.9427558	22.67202956	3.401655133	6.664999443	2.64666E-11	1.74605E-08	4
TraesCS4B02G062600.2	37.03959834	8.761523654	2.421648938	3.61799909	0.000296889	0.049774372	4
TraesCS4B02G071800.2	9.309314758	35.72083168	6.559738489	5.445465812	5.167E-08	2.0977E-05	4
TraesCS4B02G126200.4	40.52456649	9.318309875	2.368117236	3.934902265	8.32306E-05	0.01783357	4
TraesCS4B02G126300.2	204.7834645	9.737665887	1.994315507	4.882710811	1.04637E-06	0.000336305	4
TraesCS4B02G164500.4	9.035360524	30.76089217	6.559537458	4.689491045	2.73885E-06	0.000817393	4
TraesCS4B02G202000.1	190.9376059	4.635564367	1.278456945	3.625905735	0.00028795	0.048692751	4
TraesCS4B02G214500.1	32.53483912	27.10158504	6.663375026	4.067245942	4.7572E-05	0.010841773	4
TraesCS4B02G253300.1	42.46945197	21.54786689	4.688953929	4.595452891	4.3181E-06	0.001240706	4
TraesCS4B02G297300.1	119.1507685	5.446367418	1.280598286	4.252986652	2.10938E-05	0.005274874	4
TraesCS4B02G327800.1	260.2917928	23.59324986	2.998602273	7.868082429	3.60118E-15	4.299E-12	4
TraesCS4D02G014100.2	57.6615627	21.40186546	1.635124355	13.08883045	3.81436E-39	5.46418E-35	4
TraesCS4D02G025300.2	61.25661812	9.665411211	2.482752498	3.89302245	9.9003E-05	0.020554291	4
TraesCS4D02G040200.3	54.15742495	32.89674805	6.560971824	5.014005384	5.33085E-07	0.000184332	4
TraesCS4D02G052400.1	190.4108143	24.51553721	3.784820263	6.477331948	9.33587E-11	5.5069E-08	4
TraesCS4D02G079600.1	72.26652267	23.09894392	3.642648972	6.341248936	2.2791E-10	1.29853E-07	4
TraesCS4D02G105000.2	19.47414053	34.12358922	5.231476358	6.522745566	6.90319E-11	4.1451E-08	4
TraesCS4D02G117800.3	9.583272249	6.461600525	1.699291159	3.802527006	0.000143228	0.027567061	4
TraesCS4D02G132600.4	57.87329961	23.17535084	4.094965797	5.659473604	1.51838E-08	6.70743E-06	4
TraesCS4D02G147700.4	43.21339695	23.93815454	6.242883849	3.834470593	0.000125835	0.02474188	4
TraesCS4D02G159500.1	217.5808769	36.48461193	4.276986525	8.530448183	1.45782E-17	2.47772E-14	4
TraesCS4D02G165700.1	73.51936271	22.94079293	3.014034402	7.611324181	2.71302E-14	2.83389E-11	4
TraesCS4D02G172200.1	197.9858966	4.765043821	1.19173283	3.998416173	6.37678E-05	0.014273302	4
TraesCS4D02G184600.2	45.50122355	24.51632182	6.559025446	3.737799468	0.000185638	0.034156354	4
TraesCS4D02G202800.1	139.731544	4.394429159	1.071435436	4.101440937	4.10585E-05	0.009508606	4
TraesCS4D02G211300.3	138.7672031	23.23880067	2.549695223	9.114344513	7.91475E-20	1.68865E-16	4
TraesCS4D02G230700.2	40.63793201	35.12232883	6.559667365	5.354285038	8.58954E-08	3.40448E-05	4
TraesCS4D02G253400.5	43.73220664	35.43682597	4.753665326	7.454632067	9.0119E-14	8.44566E-11	4
TraesCS4D02G274400.1	41.74444427	23.7719735	6.172672348	3.851163994	0.000117558	0.023618067	4
TraesCS4D02G277400.2	150.4170279	11.02864754	2.75951881	3.996583572	6.42632E-05	0.014320269	4
TraesCS4D02G280100.3	59.43169365	21.60538411	3.033094623	7.12321467	1.05438E-12	8.52665E-10	4
TraesCS4D02G282600.1	350.0766941	4.413132497	1.16054319	3.802643911	0.00014316	0.027567061	4
TraesCS4D02G295000.2	189.4566173	25.2187225	6.558549476	3.845167685	0.00012047	0.024003604	4
TraesCS4D02G296200.1	96.2593966	4.799894785	1.245945179	3.852412504	0.00011696	0.023598341	4
TraesCS4D02G299000.1	43.99761493	36.05693092	6.559397118	5.49698856	3.86332E-08	1.63461E-05	4
TraesCS4D02G348300.5	14.76020306	32.22123256	6.560172067	4.911644425	9.03157E-07	0.000295967	4
TraesCS4D02G358800.2	545.8718201	25.61987701	5.849162225	4.380093426	1.18628E-05	0.003130448	4
TraesCS5A02G004600.1	1119.428753	3.687085666	0.939802407	3.923256247	8.73601E-05	0.018554392	4
TraesCS5A02G004700.1	1003.841983	3.811579022	0.902993341	4.22104887	2.43168E-05	0.005976514	4
TraesCS5A02G004800.1	330.1485427	5.775202382	1.281924162	4.505104556	6.63403E-06	0.001817597	4
TraesCS5A02G004900.1	1050.507104	5.541029027	1.169259902	4.738919909	2.1486E-06	0.000648963	4
TraesCS5A02G005500.1	11.17645141	18.45928501	4.504148332	4.098285324	4.16222E-05	0.009594827	4
TraesCS5A02G072700.3	12.56193628	33.46604164	6.561117065	5.100662175	3.38467E-07	0.00012165	4
TraesCS5A02G090200.3	29.71884586	46.66040511	6.55912794	7.113812314	1.12881E-12	9.05546E-10	4
TraesCS5A02G092800.1	307.8742062	3.216880431	0.879275636	3.658557451	0.000253639	0.0437765	4
TraesCS5A02G105900.11	263.3752368	9.048432557	1.896637022	4.770777144	1.83516E-06	0.00056623	4
TraesCS5A02G143600.1	9.853083259	26.7118294	6.559678911	4.07212453	4.65863E-05	0.010665594	4
TraesCS5A02G175600.1	37.88767059	19.15653004	3.436315547	5.574729613	2.47915E-08	1.0762E-05	4
TraesCS5A02G180400.2	14.00186032	7.500747387	1.672204758	4.485543622	7.27283E-06	0.001971074	4
TraesCS5A02G195900.1	19.46874521	7.767461675	2.017137706	3.850734461	0.000117764	0.023618067	4
TraesCS5A02G212800.1	249.9189907	4.436630172	1.019344465	4.352434652	1.34634E-05	0.003506674	4
TraesCS5A02G218200.1	70.02326315	3.912937572	1.041750759	3.756116841	0.00017257	0.032150788	4
TraesCS5A02G260600.4	15.19745864	34.09330136	6.559801316	5.197307009	2.02196E-07	7.48178E-05	4
TraesCS5A02G370500.3	28.49467909	23.07585967	4.027695025	5.729296664	1.00848E-08	4.70359E-06	4
TraesCS5A02G398100.2	19.25266808	28.26977696	6.559537566	4.309721024	1.63461E-05	0.004192159	4
TraesCS5A02G401700.2	23.67329416	23.29564721	5.957299226	3.910437654	9.2129E-05	0.019449313	4
TraesCS5A02G413700.1	26.37704223	7.95076677	2.056767684	3.865661071	0.000110789	0.022580404	4
TraesCS5A02G414200.1	28.91750039	5.782481491	1.536075601	3.764451104	0.000166915	0.03139971	4
TraesCS5A02G423300.1	41.3163136	21.78041929	3.414689101	6.378448709	1.78891E-10	1.03096E-07	4
TraesCS5A02G447200.1	583.7365357	4.91955893	1.051629534	4.678034203	2.89638E-06	0.000854237	4
TraesCS5A02G447900.1	50.1543336	22.86125347	4.181831355	5.466804261	4.58222E-08	1.89872E-05	4
TraesCS5A02G505000.1	333.324758	25.92908056	3.66455405	7.075644185	1.48756E-12	1.18387E-09	4
TraesCS5B02G054800.1	62.45511608	7.528466963	1.694313603	4.443372791	8.85595E-06	0.002361831	4
TraesCS5B02G075100.1	64.95503419	24.58718045	6.558614312	3.748837678	0.000177656	0.032929413	4
TraesCS5B02G093200.1	104.5578269	9.990528584	1.901244953	5.254729838	1.48242E-07	5.65219E-05	4
TraesCS5B02G098900.1	382.0674098	3.739049201	0.899065624	4.158816777	3.199E-05	0.007637774	4
TraesCS5B02G132600.2	22.76916907	21.95902231	4.470253403	4.912254482	9.00351E-07	0.000295967	4
TraesCS5B02G155200.1	341.112729	8.334957654	2.301890543	3.620918327	0.000293559	0.049391332	4
TraesCS5B02G175700.1	107.9195863	24.88656975	4.090942322	6.083334302	1.17709E-09	6.05306E-07	4
TraesCS5B02G177400.4	77.96852217	6.341007452	1.313547272	4.827391894	1.38333E-06	0.00043683	4
TraesCS5B02G260500.2	85.55309846	9.253717465	1.699254157	5.445752437	5.15868E-08	2.0977E-05	4
TraesCS5B02G356300.2	191.8650969	35.41894328	6.558543905	5.400427868	6.64821E-08	2.65603E-05	4
TraesCS5B02G371200.1	41.92715678	22.8036908	2.765873008	8.244662981	1.65626E-16	2.44243E-13	4
TraesCS5B02G392500.2	22.01696014	42.74328354	2.484495679	17.204008	2.47784E-66	1.24235E-61	4
TraesCS5B02G394200.2	20.5224788	46.53273139	2.510899688	18.53229407	1.1335E-76	1.13664E-71	4
TraesCS5B02G403700.1	1479.020925	3.254403872	0.835419121	3.895534338	9.79825E-05	0.020384625	4
TraesCS5B02G405200.1	28.36603568	37.68631949	2.876671071	13.10067038	3.26362E-39	5.45444E-35	4
TraesCS5B02G433300.2	213.057873	25.26456595	2.994097506	8.438123974	3.22471E-17	5.13277E-14	4
TraesCS5B02G449500.1	3495.933154	4.223984043	1.094922333	3.857793302	0.000114415	0.023131506	4
TraesCS5B02G501200.2	26.10268221	23.43237206	3.732690811	6.277608634	3.4382E-10	1.884E-07	4
TraesCS5B02G549500.2	48.01483036	21.04306026	5.290444886	3.977559678	6.96262E-05	0.015378638	4
TraesCS5D02G011800.1	638.0007671	4.61825337	1.109337174	4.163074561	3.13991E-05	0.007514571	4
TraesCS5D02G011900.1	456.1149182	5.416403953	1.139428202	4.753615841	1.99811E-06	0.000607164	4
TraesCS5D02G012000.1	789.9953194	3.921987831	0.975630143	4.019953525	5.82096E-05	0.013117048	4
TraesCS5D02G012300.2	284.3390513	5.809861747	1.410846358	4.11799748	3.82179E-05	0.008948982	4
TraesCS5D02G018100.7	23.17203992	21.38190842	3.485221966	6.135020561	8.51482E-10	4.42404E-07	4
TraesCS5D02G085500.1	47.35204765	32.8951294	6.558968136	5.015290319	5.29534E-07	0.000183737	4
TraesCS5D02G085500.3	12.11982627	21.95278639	4.199690155	5.227239531	1.7206E-07	6.46203E-05	4
TraesCS5D02G098900.3	75.95739845	23.34735634	3.740707878	6.241427319	4.33596E-10	2.30051E-07	4
TraesCS5D02G105100.1	414.7500979	2.685036426	0.711043032	3.776193994	0.000159243	0.030186028	4
TraesCS5D02G123100.1	65.05506974	23.42383512	4.091938649	5.724385707	1.03809E-08	4.81927E-06	4
TraesCS5D02G124400.2	22.50610414	44.20312776	4.769536631	9.267803391	1.90019E-20	4.43128E-17	4
TraesCS5D02G153900.3	19.06923698	23.12605183	6.070841394	3.809365181	0.000139324	0.027023207	4
TraesCS5D02G179600.2	29.04802667	20.78166068	3.149995788	6.59736142	4.1854E-11	2.57484E-08	4
TraesCS5D02G179800.2	39.64913413	22.97507452	3.302037647	6.95784754	3.45511E-12	2.52896E-09	4
TraesCS5D02G186100.2	43.7118221	48.04518594	6.468665564	7.42737207	1.10776E-13	1.00985E-10	4
TraesCS5D02G216600.1	124.7282095	4.628942943	1.212872828	3.816511375	0.000135352	0.026354711	4
TraesCS5D02G217200.1	72.13251482	23.772636	2.628087116	9.045604256	1.4884E-19	3.10942E-16	4
TraesCS5D02G240100.1	109.2658285	3.494624397	0.953655974	3.66444975	0.000247871	0.043130112	4
TraesCS5D02G284100.1	27.65008667	17.24559163	2.58364793	6.674900023	2.47401E-11	1.64295E-08	4
TraesCS5D02G284100.3	26.83848826	21.81945465	2.488826578	8.766964657	1.83547E-18	3.34647E-15	4
TraesCS5D02G292700.1	31.45862504	22.50056042	4.301251238	5.231166276	1.68444E-07	6.35002E-05	4
TraesCS5D02G299400.1	248.8204119	5.221015265	1.32039142	3.954142071	7.68098E-05	0.016744027	4
TraesCS5D02G312200.2	54.08731887	41.12416421	6.55868244	6.270186823	3.60615E-10	1.96529E-07	4
TraesCS5D02G326200.2	129.1739226	41.72653506	5.756539579	7.248544805	4.21273E-13	3.58E-10	4
TraesCS5D02G328000.3	13.43303863	6.815740384	1.506934971	4.522916061	6.09934E-06	0.001698955	4
TraesCS5D02G328300.1	994.7937063	27.88974077	3.212368971	8.681985482	3.88919E-18	6.96422E-15	4
TraesCS5D02G422700.2	49.71595634	22.69340644	2.310283019	9.822781995	8.98296E-23	2.64937E-19	4
TraesCS5D02G446900.1	569.5347455	4.187411945	1.126604359	3.716843371	0.000201727	0.036447964	4
TraesCS5D02G452500.1	4541.376251	3.701551567	0.902908265	4.099587644	4.13887E-05	0.009562981	4
TraesCS5D02G481200.2	81.42164538	22.28819449	3.925937627	5.677164694	1.36946E-08	6.13058E-06	4
TraesCS5D02G487900.1	833.6956095	3.970326575	1.061428033	3.740551832	0.000183617	0.033908894	4
TraesCS5D02G488300.1	887.4908463	6.331930499	1.490260347	4.24887538	2.14846E-05	0.005359242	4
TraesCS5D02G488400.1	347.2184013	6.247524271	1.458751302	4.282789167	1.84565E-05	0.004661871	4
TraesCS5D02G488500.1	885.0163736	5.410328552	1.105634929	4.893413198	9.9102E-07	0.000321607	4
TraesCS5D02G488800.1	239.0144788	9.314594435	2.213339961	4.208388499	2.57198E-05	0.006244814	4
TraesCS5D02G488900.1	1422.922341	5.267586406	1.099905958	4.789124352	1.67511E-06	0.00052166	4
TraesCS5D02G497400.2	9.669249893	36.74445621	4.535200555	8.102057618	5.40373E-16	7.35678E-13	4
TraesCS5D02G519400.2	115.4864128	41.43870599	6.558824286	6.318008255	2.64956E-10	1.49264E-07	4
TraesCS5D02G531600.1	21.60595528	22.16501378	4.260616774	5.202301674	1.96835E-07	7.31039E-05	4
TraesCS5D02G536000.2	9.694570935	6.809368925	1.503384091	4.529360772	5.91624E-06	0.00165672	4
TraesCS5D02G553900.1	219.4356833	4.323119829	1.127025381	3.83586732	0.000125122	0.024650007	4
TraesCS5D02G565200.1	136.9107932	6.213478298	1.619491286	3.83668523	0.000124706	0.024616453	4
TraesCS6A02G131400.2	81.0508207	24.60838625	3.4083085	7.220117032	5.19429E-13	4.37704E-10	4
TraesCS6A02G146200.4	98.37522535	5.137150353	1.393404587	3.686761478	0.000227126	0.040382127	4
TraesCS6A02G194800.7	105.3563653	35.62813149	6.558657626	5.432229203	5.56544E-08	2.24131E-05	4
TraesCS6A02G226100.2	76.04123797	23.11504089	6.183913819	3.737930631	0.000185541	0.034156354	4
TraesCS6A02G235300.3	36.71409296	23.5298099	4.483243289	5.248390146	1.53434E-07	5.806E-05	4
TraesCS6A02G270800.8	58.61806122	6.680212223	1.700619649	3.928104811	8.56179E-05	0.018267034	4
TraesCS6A02G284800.1	51.94176832	22.68887627	2.866873051	7.914154505	2.48939E-15	3.08183E-12	4
TraesCS6A02G286100.1	47.35879104	9.669710333	2.615252139	3.697429471	0.000217794	0.039069229	4
TraesCS6A02G291900.1	84.61281962	40.94794107	6.558659817	6.243339677	4.28325E-10	2.28464E-07	4
TraesCS6A02G294200.2	179.1552984	24.17879771	2.984487496	8.101490703	5.42898E-16	7.35678E-13	4
TraesCS6A02G309200.2	149.1477199	22.57190234	3.765119311	5.995003206	2.03481E-09	1.00515E-06	4
TraesCS6A02G312300.2	42.73753909	17.3121751	3.878946689	4.463112408	8.07776E-06	0.002171619	4
TraesCS6A02G329200.10	11.93389379	32.88107729	6.563737622	5.00950513	5.45702E-07	0.000188046	4
TraesCS6A02G351100.1	108.7941937	3.756553597	1.032115147	3.639665213	0.000272993	0.046476898	4
TraesCS6A02G360100.1	72.07356434	30.62299908	6.603568882	4.637340751	3.5292E-06	0.001022826	4
TraesCS6A02G395800.1	49.66536771	4.773241585	1.213353124	3.933926153	8.35695E-05	0.017868008	4
TraesCS6B02G128200.1	187.0687696	4.403753783	1.202765981	3.661355453	0.000250884	0.043375749	4
TraesCS6B02G144000.2	346.2175505	25.4712159	3.173437791	8.026379458	1.00391E-15	1.3246E-12	4
TraesCS6B02G174900.1	54.58096963	22.44800034	6.185588835	3.629080583	0.000284432	0.048179109	4
TraesCS6B02G179900.1	109.8672868	9.901065619	2.675040276	3.701277213	0.000214517	0.038550389	4
TraesCS6B02G180700.6	57.9373943	33.1499554	6.55859988	5.05442564	4.31688E-07	0.000153505	4
TraesCS6B02G226700.1	130.7558331	22.89149862	2.317290175	9.878563709	5.15667E-23	1.56696E-19	4
TraesCS6B02G230800.1	57.8410271	23.36486493	2.17472097	10.74384496	6.33499E-27	3.73678E-23	4
TraesCS6B02G246600.5	24.17911578	22.24384194	4.199954888	5.296209728	1.18231E-07	4.57353E-05	4
TraesCS6B02G274100.3	30.42396257	21.23939215	3.516142782	6.04053745	1.53602E-09	7.77915E-07	4
TraesCS6B02G302700.1	116.8003001	24.17983804	6.089107152	3.970998938	7.15719E-05	0.015704629	4
TraesCS6B02G314800.1	18.88139735	20.02940737	5.220321551	3.836814874	0.00012464	0.024616453	4
TraesCS6B02G322300.1	168.7395162	10.23793003	2.095369755	4.885977761	1.02917E-06	0.000332909	4
TraesCS6B02G327500.3	11.67549745	42.48410563	4.661005496	9.11479415	7.882E-20	1.68865E-16	4
TraesCS6B02G333500.2	36.09598335	30.31158457	6.566469513	4.616115937	3.90989E-06	0.001126643	4
TraesCS6B02G333500.3	70.07942379	9.658128116	2.381253538	4.055900794	4.99415E-05	0.011304694	4
TraesCS6B02G338200.2	144.4754616	23.33916504	3.31890181	7.032195096	2.03309E-12	1.58041E-09	4
TraesCS6B02G342500.2	31.61707261	9.104054395	2.419499107	3.762784771	0.000168032	0.031436054	4
TraesCS6B02G360000.3	25.25601218	35.33865611	5.332963766	6.626457195	3.43839E-11	2.18223E-08	4
TraesCS6B02G410900.1	67.39658061	10.24939637	2.564320387	3.996925041	6.41706E-05	0.014320269	4
TraesCS6B02G432300.1	264.4967879	23.79727456	6.533968821	3.642085723	0.000270438	0.046120254	4
TraesCS6B02G471400.1	38.69390312	3.838394118	1.013046943	3.788959776	0.000151279	0.028785284	4
TraesCS6D02G024600.2	58.69122207	23.98155019	6.451893721	3.716978491	0.00020162	0.036447964	4
TraesCS6D02G075400.1	227.7771273	23.01998986	4.547480217	5.062141837	4.14572E-07	0.000148472	4
TraesCS6D02G083600.3	46.13594455	21.74739896	4.373271727	4.972798471	6.59933E-07	0.000222815	4
TraesCS6D02G085300.1	164.9894503	38.9019177	3.813098482	10.20218016	1.93871E-24	7.77632E-21	4
TraesCS6D02G134800.1	40.81041773	21.37312595	2.686517516	7.95569946	1.78122E-15	2.26096E-12	4
TraesCS6D02G141100.2	61.01956787	22.35734852	3.339022833	6.69577587	2.1453E-11	1.43416E-08	4
TraesCS6D02G176300.4	56.54078887	21.4679003	3.640162068	5.897512225	3.69023E-09	1.77055E-06	4
TraesCS6D02G178300.7	53.31557769	42.07705479	6.282912333	6.697062215	2.12651E-11	1.43114E-08	4
TraesCS6D02G179700.2	24.70911883	22.89049214	5.067501288	4.517116196	6.26875E-06	0.001741306	4
TraesCS6D02G185500.2	8.459833867	31.98377724	6.559142386	4.876213286	1.08142E-06	0.000346458	4
TraesCS6D02G226300.1	4.374738424	28.12175112	6.559764182	4.287006414	1.81097E-05	0.004597436	4
TraesCS6D02G244300.8	27.77545205	36.86873545	6.559070002	5.621030945	1.89821E-08	8.3121E-06	4
TraesCS6D02G252300.2	99.28496903	22.96747842	3.598119945	6.383188657	1.73438E-10	1.00531E-07	4
TraesCS6D02G255200.2	177.797715	4.551833937	1.200838618	3.79054593	0.000150317	0.028656447	4
TraesCS6D02G256100.2	165.3332096	24.72134673	5.158299279	4.792538276	1.64684E-06	0.000514456	4
TraesCS6D02G288500.2	80.75036352	21.7371086	3.127447624	6.950430898	3.64172E-12	2.64624E-09	4
TraesCS6D02G393900.2	100.3897023	24.21725379	3.471755931	6.975505844	3.04772E-12	2.24718E-09	4
TraesCS7A02G015000.2	114.4245616	23.80818096	3.039941494	7.8317892	4.80975E-15	5.67421E-12	4
TraesCS7A02G166800.9	103.9463156	23.2207467	2.759587044	8.414573025	3.94329E-17	6.17845E-14	4
TraesCS7A02G167300.4	183.0591608	9.10129924	1.578275041	5.766611652	8.08811E-09	3.78996E-06	4
TraesCS7A02G168300.2	255.1398297	11.09387763	2.583014018	4.294935124	1.74744E-05	0.00445874	4
TraesCS7A02G226000.1	19.5662576	8.664922444	2.201081129	3.936666545	8.26213E-05	0.017779002	4
TraesCS7A02G239200.1	18.35397264	20.78849773	3.294044918	6.310933289	2.77358E-10	1.55378E-07	4
TraesCS7A02G241100.3	70.14474561	23.95524364	3.798186854	6.307020839	2.84458E-10	1.5847E-07	4
TraesCS7A02G249100.1	230.1636122	10.67694514	2.14158658	4.985530467	6.1792E-07	0.000210759	4
TraesCS7A02G311700.4	21.87724516	22.27718284	5.358678144	4.15721606	3.22149E-05	0.007673198	4
TraesCS7A02G334200.1	34.47360462	7.786052411	2.110518986	3.689164828	0.000224991	0.040082312	4
TraesCS7A02G360700.1	82.66366775	24.04470074	3.68390595	6.526958361	6.71187E-11	4.05449E-08	4
TraesCS7A02G391100.1	590.7531734	5.086173942	1.198022127	4.245475794	2.1813E-05	0.005414215	4
TraesCS7A02G394400.1	32.97864343	19.44635099	3.952637326	4.919841965	8.66141E-07	0.000287596	4
TraesCS7A02G410700.1	219.1043184	23.99266695	3.980151151	6.028079348	1.6592E-09	8.31896E-07	4
TraesCS7A02G416800.2	148.7544288	24.69761624	6.558604429	3.765681633	0.000166095	0.03134636	4
TraesCS7A02G419900.2	31.46728486	37.2036568	6.560343366	5.670992313	1.41973E-08	6.32738E-06	4
TraesCS7A02G440500.2	61.02910026	21.90375848	3.991258414	5.487932929	4.06664E-08	1.70624E-05	4
TraesCS7A02G461700.3	30.8888925	22.48895381	4.35763994	5.160810466	2.45883E-07	9.03165E-05	4
TraesCS7A02G466100.2	43.3837233	45.61458117	3.14104425	14.52210715	8.77701E-48	2.20033E-43	4
TraesCS7A02G518200.2	76.12996277	23.21428373	2.817373051	8.239691126	1.72656E-16	2.50919E-13	4
TraesCS7A02G568500.1	46.7047218	7.243047899	1.699584136	4.261658924	2.02915E-05	0.005099675	4
TraesCS7B02G005700.1	22.15534879	22.95443602	5.464434992	4.200697062	2.66094E-05	0.006429675	4
TraesCS7B02G027600.2	121.7516013	22.96712036	3.460757839	6.636442487	3.21344E-11	2.0656E-08	4
TraesCS7B02G057400.1	176.9485824	3.998974418	1.024621355	3.90288022	9.50547E-05	0.01998282	4
TraesCS7B02G071400.1	29.18148226	33.78215271	4.386150129	7.702005567	1.33947E-14	1.47602E-11	4
TraesCS7B02G095600.1	21.20550664	22.06750465	4.033927288	5.470476554	4.48827E-08	1.86751E-05	4
TraesCS7B02G127000.5	147.349807	9.993796735	2.021061651	4.944825275	7.62122E-07	0.000254744	4
TraesCS7B02G127600.1	32.67346744	23.33143235	3.66561056	6.364951205	1.95352E-10	1.11939E-07	4
TraesCS7B02G149500.3	338.7465476	25.49945884	5.439376254	4.687938038	2.75972E-06	0.000821175	4
TraesCS7B02G150600.2	22.93835724	21.14012388	3.981456757	5.309645482	1.09839E-07	4.30246E-05	4
TraesCS7B02G150700.2	49.57998153	21.77219953	5.846117652	3.724215082	0.000195924	0.035591766	4
TraesCS7B02G158700.2	22.42495043	23.4309668	4.951314207	4.732272245	2.2202E-06	0.000668575	4
TraesCS7B02G186300.2	16.10989786	38.51223279	3.50954894	10.97355628	5.12175E-28	3.20996E-24	4
TraesCS7B02G188000.2	17.16746886	20.28102433	4.268799067	4.750990622	2.02423E-06	0.000613242	4
TraesCS7B02G198200.1	64.19275492	35.06686245	6.558960039	5.346405869	8.97179E-08	3.5281E-05	4
TraesCS7B02G229200.2	24.72937092	32.86694633	6.562972045	5.007936359	5.50167E-07	0.00018829	4
TraesCS7B02G230200.1	16.50378874	34.13710884	6.559364417	5.204331802	1.94696E-07	7.25781E-05	4
TraesCS7B02G238400.3	27.94367583	23.52246991	5.175483639	4.544980054	5.49405E-06	0.001551905	4
TraesCS7B02G249400.2	28.44625042	35.20771507	6.558915722	5.36791698	7.96512E-08	3.16952E-05	4
TraesCS7B02G253600.2	83.26218522	36.27764101	3.710029036	9.778263366	1.39585E-22	3.8881E-19	4
TraesCS7B02G262100.1	161.5944749	23.5110723	2.79960681	8.397990823	4.54183E-17	7.00678E-14	4
TraesCS7B02G283200.1	455.4381117	2.69593443	0.732214553	3.681891352	0.00023151	0.040871718	4
TraesCS7B02G292700.1	442.6805674	4.241651466	1.142125145	3.713823731	0.000204151	0.036819517	4
TraesCS7B02G313700.5	37.56049224	22.31188311	2.626709286	8.49423392	1.99243E-17	3.22249E-14	4
TraesCS7B02G319800.2	8.234516551	44.92445908	4.252070243	10.56531443	4.3152E-26	2.06055E-22	4
TraesCS7B02G319900.2	19.90986865	39.45367116	5.86928084	6.722062249	1.7917E-11	1.23059E-08	4
TraesCS7B02G326100.2	29.22139367	36.08242737	6.558977805	5.50122724	3.77157E-08	1.60255E-05	4
TraesCS7B02G354400.1	57.52404222	4.169629933	1.091466772	3.820207854	0.000133339	0.026064056	4
TraesCS7B02G358000.2	12.47707176	6.389080503	1.68446949	3.792933348	0.000148878	0.028463706	4
TraesCS7B02G358000.3	41.42734952	8.253013711	2.281338152	3.617619643	0.000297325	0.049774372	4
TraesCS7B02G390800.1	7662.112971	21.4905269	2.225244593	9.657602119	4.56422E-22	1.17355E-18	4
TraesCS7B02G474000.1	190.3353888	4.8388474	1.170382289	4.134416118	3.55858E-05	0.00841613	4
TraesCS7D02G011800.1	74.82356852	24.00796919	3.220407638	7.454947287	8.99038E-14	8.44566E-11	4
TraesCS7D02G030800.1	168.9763204	4.455655428	1.216164613	3.663694355	0.000248603	0.043130112	4
TraesCS7D02G068500.1	32.22879507	3.648925811	0.977475107	3.733011495	0.000189204	0.034685201	4
TraesCS7D02G159900.2	208.9911236	23.27523856	2.947932926	7.895443738	2.89284E-15	3.49501E-12	4
TraesCS7D02G194500.2	13.41010965	48.81387587	3.820427677	12.77707105	2.20207E-37	2.76021E-33	4
TraesCS7D02G207300.2	37.4889439	49.77844635	4.103863484	12.12965454	7.35591E-34	5.67407E-30	4
TraesCS7D02G227400.1	61.8892723	9.733656769	2.26159976	4.303881236	1.67832E-05	0.004293279	4
TraesCS7D02G233700.3	19.81483014	21.91744411	4.682073604	4.681140445	2.85283E-06	0.000843875	4
TraesCS7D02G280800.1	79.68451702	22.3918004	2.745121324	8.156943813	3.43608E-16	4.85296E-13	4
TraesCS7D02G281900.1	161.837766	23.35397727	4.66271863	5.008661066	5.481E-07	0.000188225	4
TraesCS7D02G354200.1	391.8563223	3.400376657	0.925242141	3.675120822	0.000237737	0.04175051	4
TraesCS7D02G386600.1	1313.213663	3.819623057	1.051386681	3.632938411	0.000280212	0.047625103	4
TraesCS7D02G400900.2	6.837091367	7.699825255	1.858319211	4.143435212	3.42142E-05	0.008130083	4
TraesCS7D02G409900.2	118.5623862	24.43271601	5.125979561	4.766448191	1.87502E-06	0.000574989	4
TraesCS7D02G418200.1	207.241777	4.249856266	1.174463064	3.618552508	0.000296255	0.049761478	4
TraesCS7D02G460500.1	533.9097617	32.78280012	3.236117682	10.13028677	4.05459E-24	1.50586E-20	4
TraesCS7D02G465500.3	9.259592981	22.19662976	4.849688292	4.57691885	4.71874E-06	0.001344266	4
TraesCS7D02G485600.2	21.73461007	31.31003305	6.56094361	4.772184446	1.82238E-06	0.000564023	4
TraesCS7D02G508100.2	92.08815289	22.96571483	3.708245291	6.193148788	5.8974E-10	3.0962E-07	4
TraesCS7D02G536900.1	1119.670672	4.712549861	1.154108658	4.083280919	4.44043E-05	0.010212681	4
TraesCSU02G008700.1	1017.016539	3.124115311	0.853083775	3.662143627	0.000250114	0.043317163	4
TraesCSU02G016900.2	204.0124737	10.92277801	1.79592282	6.081986311	1.18703E-09	6.07304E-07	4
TraesCSU02G044500.1	31.94130398	22.21133027	4.652835968	4.773718744	1.80855E-06	0.000561473	4
TraesCSU02G063400.2	142.8243745	42.25166482	5.521035858	7.652851005	1.96572E-14	2.09698E-11	4
TraesCSU02G068100.1	103.6112199	24.71994346	5.072613136	4.873216782	1.09796E-06	0.000350636	4
TraesCSU02G127800.1	21.15599696	22.92610299	3.465791807	6.614968315	3.71631E-11	2.31466E-08	4
TraesCSU02G165300.2	22.53395108	22.30147179	4.303494705	5.182177118	2.19311E-07	8.08523E-05	4
TraesCSU02G258100.1	500688.9586	11.26730426	2.506843601	4.494617956	6.9695E-06	0.001899131	4
TraesCS1A02G001900.9	12.74344631	33.38423658	6.569317738	5.081842272	3.73792E-07	0.000121413	9
TraesCS1A02G007100.1	40.56668383	2.095946583	0.618007798	3.391456532	0.000695222	0.035755585	9
TraesCS1A02G018100.1	11.05895753	4.355476268	1.260625648	3.455011626	0.000550269	0.030583792	9
TraesCS1A02G033200.1	88.64270565	2.221418242	0.631623222	3.516999	0.000436455	0.025964235	9
TraesCS1A02G034300.1	8.952489162	21.93615965	5.074447139	4.322866915	1.54015E-05	0.002335674	9
TraesCS1A02G043900.1	701.4797365	7.561825653	2.120472753	3.566103664	0.000362328	0.022809315	9
TraesCS1A02G064000.1	138.7886332	2.597679382	0.398657216	6.516072651	7.2172E-11	5.60488E-08	9
TraesCS1A02G072000.2	212.7649581	10.86286075	2.072649479	5.241050579	1.59665E-07	5.68314E-05	9
TraesCS1A02G079400.1	46.74029821	4.175435001	1.278908261	3.264843249	0.001095247	0.047840769	9
TraesCS1A02G084600.1	13.66038344	5.811060653	1.491494839	3.896131922	9.77412E-05	0.009095465	9
TraesCS1A02G093900.1	101.0127972	49.06169226	6.558669933	7.480433193	7.4078E-14	1.09107E-10	9
TraesCS1A02G098900.1	45.37471504	3.521158057	1.048818398	3.357261911	0.000787185	0.038938084	9
TraesCS1A02G105800.1	15.13970852	3.558858898	0.885838205	4.017504411	5.88177E-05	0.006328166	9
TraesCS1A02G113100.1	9.07162849	2.929787756	0.816666739	3.587494895	0.00033387	0.021444512	9
TraesCS1A02G125700.1	36.09510397	2.192773512	0.66799281	3.282630409	0.001028434	0.046043801	9
TraesCS1A02G134000.1	403.9910573	1.166804279	0.236420416	4.935294085	8.00301E-07	0.00022865	9
TraesCS1A02G136400.1	43.56070876	23.60541788	3.245498848	7.273278775	3.50865E-13	4.54137E-10	9
TraesCS1A02G137800.1	41.85987353	23.30311203	3.74449667	6.223296236	4.86817E-10	2.97049E-07	9
TraesCS1A02G143900.1	134.3870632	2.528858142	0.691014889	3.659629022	0.000252581	0.017744206	9
TraesCS1A02G149700.1	60.86114578	2.866134024	0.66302082	4.322841665	1.54032E-05	0.002335674	9
TraesCS1A02G150100.1	554.9090792	2.269419655	0.65987221	3.439180526	0.000583478	0.031930937	9
TraesCS1A02G158900.2	52.86762363	24.0384354	3.650318916	6.585297327	4.53976E-11	3.69346E-08	9
TraesCS1A02G166100.1	6204.480683	2.112120724	0.648698589	3.255935439	0.001130194	0.048673557	9
TraesCS1A02G168600.1	275.3114006	2.491390936	0.617177464	4.036749689	5.41968E-05	0.005950924	9
TraesCS1A02G171400.1	54.03354253	1.294318022	0.378764658	3.417209067	0.000632667	0.033527413	9
TraesCS1A02G176800.1	27.77308738	2.460981776	0.735316109	3.346835116	0.000817398	0.039648759	9
TraesCS1A02G177000.1	23.38931102	3.509523368	0.816084315	4.300442129	1.70458E-05	0.002532438	9
TraesCS1A02G177800.1	388.7106694	2.152778927	0.529746705	4.063789175	4.82824E-05	0.005419942	9
TraesCS1A02G186600.1	2383.153018	7.657117608	2.028730186	3.774340059	0.000160432	0.013002891	9
TraesCS1A02G189200.1	11.14825436	5.694615637	1.718432001	3.313844036	0.000920228	0.042816675	9
TraesCS1A02G190100.1	17.48844831	2.472677296	0.734628247	3.365889217	0.000762973	0.038048902	9
TraesCS1A02G201600.1	19.56095383	36.45030959	6.558749155	5.557509326	2.73651E-08	1.1927E-05	9
TraesCS1A02G204200.3	28.21618431	21.40448245	4.693782998	4.56017725	5.11105E-06	0.001013031	9
TraesCS1A02G207700.1	8.277625413	35.02642299	6.562187843	5.337613586	9.41779E-08	3.62398E-05	9
TraesCS1A02G230400.1	1228.496895	1.607642468	0.355044819	4.527998671	5.9545E-06	0.001137961	9
TraesCS1A02G232500.1	58.98578266	3.904977668	0.869587105	4.490611284	7.10191E-06	0.001299125	9
TraesCS1A02G239500.1	47.99211737	3.297228871	0.727761061	4.530647557	5.88032E-06	0.001129231	9
TraesCS1A02G242600.1	932.9616845	1.082336731	0.304187088	3.558128446	0.000373507	0.023255962	9
TraesCS1A02G257000.1	94.61427725	5.152121504	0.991818838	5.19461953	2.05139E-07	6.98175E-05	9
TraesCS1A02G257200.1	416.2075204	4.307450121	1.120659172	3.843675426	0.000121205	0.010586997	9
TraesCS1A02G257300.1	254.7559463	1.424994745	0.410789492	3.468917226	0.00052256	0.029523973	9
TraesCS1A02G257500.1	107.2172916	4.330669422	1.026396257	4.219295806	2.45067E-05	0.003349609	9
TraesCS1A02G259500.2	16.19749963	37.0574702	6.15385545	6.021829811	1.72456E-09	9.75645E-07	9
TraesCS1A02G260900.2	133.9079544	26.08358034	6.55853882	3.977041389	6.9778E-05	0.007164492	9
TraesCS1A02G261400.1	597.1680424	1.734891034	0.506670463	3.424101385	0.000616836	0.03296119	9
TraesCS1A02G266000.1	12.96633357	5.444825565	1.346243942	4.044456873	5.24446E-05	0.00578828	9
TraesCS1A02G268700.1	11.37808679	4.320996801	1.122341008	3.849985674	0.000118125	0.010403014	9
TraesCS1A02G275900.1	49.46946126	4.530874304	1.216710215	3.723872987	0.00019619	0.014910763	9
TraesCS1A02G292200.1	59.71203089	1.233683424	0.38017198	3.245066674	0.001174231	0.049855805	9
TraesCS1A02G299100.1	63.77943671	3.840539216	1.037254943	3.702599099	0.000213402	0.015810994	9
TraesCS1A02G303100.1	155.688075	4.637457124	1.352704693	3.428284936	0.000607408	0.032675315	9
TraesCS1A02G310500.1	115.7564645	1.811576162	0.373324799	4.852547082	1.21886E-06	0.000333725	9
TraesCS1A02G311000.1	486.1234288	1.090427919	0.228305822	4.7761722	1.78663E-06	0.000446272	9
TraesCS1A02G323400.2	379.8626369	24.29480605	4.130925209	5.881202109	4.07297E-09	2.16111E-06	9
TraesCS1A02G337900.1	120.9018428	5.155510689	1.364626644	3.777964259	0.000158116	0.01290531	9
TraesCS1A02G340300.1	140.1328954	3.18924144	0.955855865	3.336529655	0.000848314	0.040621106	9
TraesCS1A02G343000.2	676.4281015	27.93254038	2.187724755	12.76784948	2.4791E-37	7.47018E-33	9
TraesCS1A02G351000.1	353.4284659	6.92696054	1.956993922	3.539592261	0.000400746	0.024447167	9
TraesCS1A02G351600.1	22.44702234	5.613620127	1.201497611	4.67218584	2.98011E-06	0.000661244	9
TraesCS1A02G355300.1	1051.389119	2.34737825	0.697990307	3.363052792	0.000770856	0.038352453	9
TraesCS1A02G365800.1	184.1181853	2.027505275	0.570850152	3.551729413	0.000382708	0.023647113	9
TraesCS1A02G372200.1	6.846095229	3.237048944	0.973082189	3.326593562	0.000879145	0.041522593	9
TraesCS1A02G383500.1	319.7439978	1.752941055	0.507029872	3.457273727	0.00054567	0.030422085	9
TraesCS1A02G394100.1	38.24625792	4.506263323	1.317959508	3.419121221	0.000628237	0.033354755	9
TraesCS1A02G404200.1	329.8906207	2.708337638	0.674884868	4.013036543	5.99426E-05	0.00637691	9
TraesCS1A02G424200.1	307.2736525	1.907666959	0.496965401	3.838631329	0.000123722	0.010730029	9
TraesCS1A02G430100.1	23.10248928	3.707725175	1.067029642	3.474809912	0.000511215	0.029040482	9
TraesCS1A02G430200.1	73.10576393	2.605996978	0.645757283	4.035567307	5.44705E-05	0.005973297	9
TraesCS1A02G435100.1	109.3194029	4.331442338	1.163552191	3.722602537	0.00019718	0.014946123	9
TraesCS1A02G435200.1	73.40265534	5.001432919	1.25559	3.983332871	6.79555E-05	0.007058778	9
TraesCS1A02G441100.1	65.6827644	1.760173746	0.507516419	3.468210448	0.000523937	0.029569837	9
TraesCS1B02G004100.1	377.8239214	2.720989358	0.733979987	3.707171049	0.000209587	0.015677944	9
TraesCS1B02G007400.2	177.7399393	3.141340125	0.786205415	3.995571722	6.45383E-05	0.006739914	9
TraesCS1B02G022000.1	128.2811984	7.499909116	1.425950391	5.259586283	1.4438E-07	5.22618E-05	9
TraesCS1B02G041400.1	205.2586532	2.311815631	0.701076925	3.297520639	0.000975425	0.044559712	9
TraesCS1B02G048300.1	49.35590934	4.410382506	1.288130857	3.423862166	0.000617379	0.03296265	9
TraesCS1B02G056900.1	1694.543994	8.989424963	2.326763799	3.863488407	0.000111779	0.009971613	9
TraesCS1B02G081900.1	219.0162897	1.550324121	0.437649093	3.5423908	0.000396518	0.024281655	9
TraesCS1B02G090500.2	349.4744542	25.04377016	2.663036243	9.404216793	5.24191E-21	2.35682E-17	9
TraesCS1B02G095200.1	68.72155442	31.74731638	6.559575207	4.83984334	1.29942E-06	0.000351278	9
TraesCS1B02G105300.2	51.2135047	6.560784004	1.998028194	3.283629341	0.001024796	0.04602746	9
TraesCS1B02G125700.1	16.28021156	3.089900536	0.929033135	3.325931466	0.000881236	0.041522593	9
TraesCS1B02G133200.1	17.79528366	2.595081924	0.74130051	3.500715147	0.000464012	0.027038642	9
TraesCS1B02G140900.3	27.03249122	35.21218527	6.558970389	5.36855378	7.93705E-08	3.12457E-05	9
TraesCS1B02G146400.1	40.13787212	23.93174657	3.763550302	6.358822029	2.03307E-10	1.43535E-07	9
TraesCS1B02G147400.1	18.376088	4.732337513	1.424123787	3.322981862	0.000890607	0.041802746	9
TraesCS1B02G156800.1	58.35687434	24.1333461	6.081494705	3.968324773	7.23796E-05	0.007378406	9
TraesCS1B02G157700.1	47.36920438	1.440251367	0.411044058	3.503885627	0.000458522	0.026810213	9
TraesCS1B02G161300.1	532.3022342	2.295826462	0.622339472	3.68902595	0.000225114	0.016405722	9
TraesCS1B02G162300.1	264.2078298	1.091461529	0.332463067	3.282955721	0.001027248	0.046043801	9
TraesCS1B02G164200.1	265.2182967	4.864168274	1.151116445	4.225609227	2.38295E-05	0.003293949	9
TraesCS1B02G167700.1	59.2214868	2.263449296	0.575019217	3.936302006	8.27468E-05	0.008133519	9
TraesCS1B02G185600.1	44.53881874	1.646434952	0.431177332	3.818463608	0.000134285	0.01138042	9
TraesCS1B02G190600.1	411.2339423	3.130301494	0.733930764	4.26511825	1.99796E-05	0.002854148	9
TraesCS1B02G196600.1	9.431201393	2.960217031	0.726020071	4.077321205	4.55575E-05	0.0051547	9
TraesCS1B02G197000.1	73.6987725	4.127133952	1.097126721	3.761765961	0.000168718	0.013469995	9
TraesCS1B02G202400.1	329.400092	1.438890975	0.310893398	4.628245513	3.68777E-06	0.000791536	9
TraesCS1B02G219800.1	54.58249057	1.358194149	0.398282728	3.410125651	0.00064933	0.034219388	9
TraesCS1B02G224300.1	28.71519101	5.261937238	1.571666072	3.347999509	0.000813972	0.039648759	9
TraesCS1B02G250600.1	603.2303008	1.771212909	0.54464044	3.252077481	0.001145648	0.04905631	9
TraesCS1B02G251700.1	50.94292734	1.939677943	0.462505855	4.193845164	2.74265E-05	0.003622257	9
TraesCS1B02G257500.2	115.913157	36.53628859	5.814385697	6.283774502	3.3045E-10	2.1883E-07	9
TraesCS1B02G267000.6	146.513775	10.59372828	3.077258211	3.44258673	0.000576179	0.031714352	9
TraesCS1B02G267600.1	52.93131802	4.073775286	0.883707023	4.609870895	4.02919E-06	0.000849871	9
TraesCS1B02G267700.1	68.60161981	3.782370812	1.005005525	3.763532356	0.00016753	0.013412766	9
TraesCS1B02G268000.1	102.484105	5.2315155	0.832862511	6.281367488	3.35608E-10	2.20536E-07	9
TraesCS1B02G272200.2	139.3848232	2.504659702	0.738131939	3.393241192	0.000690708	0.035652215	9
TraesCS1B02G274500.1	7.574303794	6.632953497	1.790741235	3.704026783	0.000212204	0.01577345	9
TraesCS1B02G275000.1	50.81617789	1.662104597	0.349069134	4.761534135	1.92127E-06	0.000468932	9
TraesCS1B02G279300.1	7.789650489	3.962203935	0.908811762	4.359763043	1.30203E-05	0.002063515	9
TraesCS1B02G279600.2	43.24365818	42.52265004	4.613518069	9.216968353	3.05619E-20	1.24323E-16	9
TraesCS1B02G281200.1	862.0469467	2.856448337	0.853759163	3.34573081	0.00082066	0.039697465	9
TraesCS1B02G281600.1	231.9329618	1.687569305	0.368893521	4.574678624	4.76952E-06	0.000963114	9
TraesCS1B02G285100.1	38.54085558	6.841514151	1.578723852	4.333572424	1.46709E-05	0.002258155	9
TraesCS1B02G291500.1	43.55089046	4.590515895	0.930098923	4.935513614	7.99401E-07	0.00022865	9
TraesCS1B02G293000.2	80.96202937	34.6738312	6.561704281	5.284272152	1.26206E-07	4.70796E-05	9
TraesCS1B02G308900.1	122.6247337	5.73107286	1.438825438	3.983160644	6.80048E-05	0.007058778	9
TraesCS1B02G312800.1	467.913677	3.524142027	0.886363366	3.97595632	7.0097E-05	0.007188602	9
TraesCS1B02G313400.1	41.58852806	4.485205779	1.340303349	3.346410932	0.00081865	0.039648759	9
TraesCS1B02G321800.2	63.4085442	2.552535906	0.532760387	4.79115183	1.65827E-06	0.000426684	9
TraesCS1B02G336000.1	147.1889136	1.911099381	0.410155503	4.659450785	3.17054E-06	0.000696264	9
TraesCS1B02G341600.1	37.71864756	3.4643536	1.03250689	3.35528376	0.000792836	0.039097425	9
TraesCS1B02G342200.2	43.81515483	30.20364846	6.559687128	4.604434307	4.13589E-06	0.000865961	9
TraesCS1B02G343900.1	47.97987779	23.00665353	5.252979985	4.379733712	1.18824E-05	0.00192979	9
TraesCS1B02G352600.1	53.85159297	3.345169016	0.972097908	3.441185284	0.000579172	0.031817575	9
TraesCS1B02G361500.1	618.7714962	2.280336303	0.603615585	3.777795601	0.000158223	0.01290531	9
TraesCS1B02G365200.1	249.0479352	4.741079623	1.321224328	3.588398672	0.000332715	0.021386406	9
TraesCS1B02G371900.1	149.6347716	4.819598156	1.402468445	3.43651094	0.000589259	0.032073441	9
TraesCS1B02G383200.2	36.54927994	49.08437248	6.558948745	7.483573113	7.23286E-14	1.08399E-10	9
TraesCS1B02G384900.1	45.3427515	4.882330282	1.483890042	3.290223765	0.001001077	0.045343604	9
TraesCS1B02G410800.1	149.3982167	40.24265853	3.830371137	10.50620347	8.08844E-26	5.3151E-22	9
TraesCS1B02G411700.1	126.9396788	25.2761933	3.959021538	6.384454608	1.72009E-10	1.22451E-07	9
TraesCS1B02G420000.1	55.05095846	2.440331377	0.73721678	3.310195105	0.00093231	0.043097122	9
TraesCS1B02G425000.1	131.2633778	5.637214234	1.116226641	5.050241613	4.41252E-07	0.000140128	9
TraesCS1B02G433700.1	660.1515462	2.782083526	0.830004214	3.351890846	0.000802617	0.039387765	9
TraesCS1B02G462300.1	7.679416428	5.900788262	1.329661159	4.437813516	9.08773E-06	0.001559675	9
TraesCS1B02G464900.1	110.0330799	6.783659138	1.807267909	3.753543735	0.000174352	0.013790928	9
TraesCS1B02G465000.1	190.2811551	2.613121653	0.693750199	3.766660763	0.000165446	0.013286321	9
TraesCS1B02G470900.1	127.4007443	5.023783726	1.22284239	4.10828392	3.9861E-05	0.004762468	9
TraesCS1B02G471000.1	136.5855009	4.590690772	1.040332376	4.412715473	1.02082E-05	0.001713255	9
TraesCS1B02G480300.1	92.92512376	2.354437644	0.608744846	3.86769212	0.00010987	0.009904178	9
TraesCS1D02G000800.1	109.3557142	24.91938891	4.136577001	6.024156906	1.69993E-09	9.68124E-07	9
TraesCS1D02G005100.1	70.30329684	3.394195227	1.032715999	3.286668582	0.001013801	0.045725945	9
TraesCS1D02G020600.1	258.34603	6.083285629	1.27135151	4.784896688	1.71075E-06	0.000436247	9
TraesCS1D02G039300.1	161.6485642	3.451747444	0.894233401	3.860007284	0.000113384	0.010093088	9
TraesCS1D02G039400.1	40.86164102	4.969873384	1.348154809	3.686426329	0.000227425	0.016520432	9
TraesCS1D02G044300.1	1110.259478	9.036476352	2.411148079	3.747789872	0.0001784	0.013994458	9
TraesCS1D02G048900.1	43.71194189	3.561115769	0.917731086	3.880347767	0.000104307	0.009495126	9
TraesCS1D02G052500.1	604.1496236	8.097556055	2.174722085	3.723490055	0.000196488	0.014920133	9
TraesCS1D02G064500.1	181.4416279	1.990993044	0.54854211	3.629608386	0.000283852	0.019198971	9
TraesCS1D02G066700.5	11.09812741	36.48225712	6.205632076	5.878894636	4.13015E-09	2.17792E-06	9
TraesCS1D02G080900.1	13.65039104	5.618043437	1.518909152	3.698735654	0.000216676	0.015984261	9
TraesCS1D02G088300.3	28.64942688	23.25913412	3.172137613	7.332321911	2.26199E-13	3.11666E-10	9
TraesCS1D02G122600.1	14.46777736	4.973863013	1.112648604	4.470290977	7.81133E-06	0.001390188	9
TraesCS1D02G123400.2	221.4155059	36.2479559	5.912806744	6.130414449	8.76504E-10	5.16388E-07	9
TraesCS1D02G136800.3	10.66321129	29.43070665	6.562976396	4.484353572	7.31353E-06	0.001324451	9
TraesCS1D02G142700.1	441.9945676	3.054223411	0.751558332	4.063854105	4.8269E-05	0.005419942	9
TraesCS1D02G144600.1	114.4991845	4.265692256	1.215582941	3.509174169	0.0004495	0.026409233	9
TraesCS1D02G146600.1	64.99333902	4.560667113	1.316627329	3.463901297	0.000532402	0.029891812	9
TraesCS1D02G165000.1	207.9930582	3.490116778	0.872661549	3.999393332	6.35051E-05	0.006656421	9
TraesCS1D02G165500.1	591.1121047	1.241098657	0.35521339	3.493952344	0.000475926	0.027563696	9
TraesCS1D02G166600.1	317.4046074	2.356600228	0.609516368	3.86634445	0.000110479	0.009940682	9
TraesCS1D02G168600.2	199.5943958	1.122931404	0.272153764	4.126091764	3.6898E-05	0.004490099	9
TraesCS1D02G173800.1	79.08738458	3.274202729	0.928151596	3.527659427	0.000419251	0.025186324	9
TraesCS1D02G176400.1	526.8817819	1.893761716	0.507623498	3.730642344	0.000190992	0.014685598	9
TraesCS1D02G176900.1	60.60287791	4.021542265	0.980661244	4.100847555	4.1164E-05	0.004890783	9
TraesCS1D02G187100.1	58.2457869	5.09485786	1.500794667	3.39477343	0.000686854	0.035517678	9
TraesCS1D02G187500.1	7.499481327	3.479931269	0.94551859	3.680447224	0.000232825	0.016770092	9
TraesCS1D02G190000.1	203.6099544	2.690499098	0.797939063	3.371810234	0.000746759	0.037467378	9
TraesCS1D02G208900.1	203.4481425	1.11318872	0.30073381	3.701574891	0.000214265	0.015847477	9
TraesCS1D02G231600.1	1390.078492	1.807738844	0.401402371	4.503557959	6.68251E-06	0.001241001	9
TraesCS1D02G232700.1	48.51052394	6.56950221	1.894240945	3.468144973	0.000524064	0.029569837	9
TraesCS1D02G239700.1	71.78340206	2.352927664	0.552207085	4.260951602	2.03558E-05	0.002883777	9
TraesCS1D02G246200.3	68.22910407	34.11750949	6.558592288	5.201956151	1.97202E-07	6.82031E-05	9
TraesCS1D02G256400.1	104.7161972	4.480543244	1.178284068	3.80260021	0.000143185	0.012027285	9
TraesCS1D02G256500.1	19.95673253	7.044026456	1.425883744	4.940112745	7.80774E-07	0.000225332	9
TraesCS1D02G256800.1	566.3442741	3.881133511	0.736155438	5.272165783	1.34823E-07	4.92197E-05	9
TraesCS1D02G261400.1	182.4274297	2.945122756	0.675647968	4.358960427	1.30682E-05	0.002063515	9
TraesCS1D02G269200.2	40.36280928	33.62710611	6.564904151	5.122253933	3.01905E-07	9.96315E-05	9
TraesCS1D02G271100.1	1489.015214	2.67005769	0.735249696	3.63149785	0.000281781	0.019104305	9
TraesCS1D02G271200.1	32.20464406	5.409904889	1.294738843	4.178375367	2.93599E-05	0.003782952	9
TraesCS1D02G271800.1	198.6716996	1.631864918	0.498177045	3.275672646	0.001054107	0.046802554	9
TraesCS1D02G275500.1	41.40383682	4.702573787	1.013773965	4.638680762	3.5064E-06	0.000756409	9
TraesCS1D02G280700.1	157.8874099	2.093862514	0.583208626	3.590246132	0.000330366	0.021299497	9
TraesCS1D02G281800.1	74.8833891	3.600241426	0.753296337	4.779316254	1.75892E-06	0.000441935	9
TraesCS1D02G282000.1	93.47288866	2.990042187	0.920426152	3.248541102	0.001159984	0.049496921	9
TraesCS1D02G290500.1	116.6094133	1.4920111	0.431179803	3.460299141	0.000539576	0.030185845	9
TraesCS1D02G290700.1	29.27907319	1.938280043	0.461437975	4.2005213	2.66301E-05	0.003545834	9
TraesCS1D02G292100.1	212.5649764	4.473347272	1.172003027	3.816839352	0.000135172	0.011425334	9
TraesCS1D02G302000.1	459.0637337	1.959528553	0.559946669	3.499491398	0.000466147	0.027141913	9
TraesCS1D02G302500.1	94.99581324	6.874113564	1.724258538	3.986706989	6.69967E-05	0.006979583	9
TraesCS1D02G304700.1	27.98315192	2.727863373	0.829550655	3.28836263	0.001007719	0.045523768	9
TraesCS1D02G310000.1	85.07196982	1.29819744	0.339741244	3.821135834	0.000132838	0.011268975	9
TraesCS1D02G310900.1	448.2045048	1.300599466	0.365826628	3.555234545	0.000377642	0.02339409	9
TraesCS1D02G338500.1	147.7151153	7.153537965	2.120075259	3.374190578	0.000740331	0.037272439	9
TraesCS1D02G339800.1	39.96638036	4.998025696	1.467965797	3.404728983	0.000662297	0.034645369	9
TraesCS1D02G341000.5	25.15202119	8.115487703	2.424113533	3.347816672	0.000814509	0.039648759	9
TraesCS1D02G344300.1	10.47824296	3.159687527	0.948019164	3.332936345	0.000859346	0.040986281	9
TraesCS1D02G345100.1	821.8523005	2.407582845	0.733247945	3.283449838	0.001025449	0.04603258	9
TraesCS1D02G350100.1	149.8199043	1.800115523	0.515509825	3.491913127	0.000479574	0.027699868	9
TraesCS1D02G350200.1	431.6742877	2.025080824	0.612002871	3.308940073	0.000936499	0.043228858	9
TraesCS1D02G355100.1	715.6746764	3.190296279	0.945564031	3.373961122	0.000740948	0.037272439	9
TraesCS1D02G359100.1	36.79150727	4.590679195	1.268606789	3.618677776	0.000296112	0.019716031	9
TraesCS1D02G359500.1	129.8184909	3.658739906	1.058313166	3.457142956	0.000545935	0.030422085	9
TraesCS1D02G363800.1	8.214424327	3.885723149	1.050019527	3.700619891	0.000215073	0.01589348	9
TraesCS1D02G371200.1	161.6863311	1.341371351	0.412065398	3.255238992	0.00113297	0.048733481	9
TraesCS1D02G372700.1	12.18757446	4.435047056	1.33922078	3.311662365	0.000927434	0.042957674	9
TraesCS1D02G376900.3	12.47530865	22.69067631	6.430494257	3.528605329	0.000417756	0.025120776	9
TraesCS1D02G378700.2	17.29214995	8.569164817	2.404057255	3.564459539	0.000364607	0.022918978	9
TraesCS1D02G393000.1	171.5453289	25.71291178	4.100245319	6.271066677	3.58583E-10	2.32506E-07	9
TraesCS1D02G400000.1	74.12279501	2.710537027	0.691118585	3.921956499	8.78329E-05	0.008439673	9
TraesCS1D02G402400.1	33.59921238	5.687116802	1.590295219	3.576139031	0.000348706	0.022180625	9
TraesCS1D02G411700.4	134.7489642	24.02523732	3.47790831	6.907955925	4.91687E-12	5.00034E-09	9
TraesCS1D02G412000.1	761.5879834	2.324687918	0.703661535	3.303701856	0.000954172	0.043776122	9
TraesCS1D02G426400.1	22.02792316	22.33205771	3.52013887	6.344084292	2.23752E-10	1.56674E-07	9
TraesCS1D02G433400.1	426.1830556	1.873947886	0.465987242	4.021457494	5.78391E-05	0.006254388	9
TraesCS1D02G439200.1	44.22328033	4.436909564	1.329642463	3.336919275	0.000847125	0.040586956	9
TraesCS1D02G439300.1	66.70887031	4.259326495	1.044238627	4.078882341	4.52527E-05	0.005133811	9
TraesCS1D02G439400.1	62.22007353	3.552263755	0.991637165	3.582221282	0.000340685	0.021751389	9
TraesCS1D02G439500.1	182.6567873	3.09004639	0.636631113	4.853747057	1.2115E-06	0.000332778	9
TraesCS1D02G449600.1	118.3695363	1.992112359	0.548287325	3.633336514	0.00027978	0.019029032	9
TraesCS1D02G453800.1	72.46455664	2.918881115	0.825552785	3.535668667	0.000406744	0.024677951	9
TraesCS2A02G000600.1	64.20749565	1.905955612	0.448008341	4.254285998	2.09717E-05	0.002956319	9
TraesCS2A02G012200.2	45.94716013	21.61882732	4.402558329	4.910514682	9.08377E-07	0.00025526	9
TraesCS2A02G026500.1	12.57302329	6.208182522	1.907308856	3.254943478	0.001134149	0.048733481	9
TraesCS2A02G028700.1	117.6577867	2.603884812	0.722419094	3.604396443	0.000312879	0.020418652	9
TraesCS2A02G031400.1	238.1222978	4.523001118	1.095994563	4.126846311	3.67772E-05	0.004481782	9
TraesCS2A02G037800.1	36.76052388	33.06750337	6.55867995	5.041792498	4.61191E-07	0.000145906	9
TraesCS2A02G045400.2	174.5933181	5.728657934	1.556992703	3.67930943	0.000233866	0.016816725	9
TraesCS2A02G048600.1	62.88677103	3.048245439	0.921924405	3.306394128	0.000945051	0.043568208	9
TraesCS2A02G049700.1	62.79670001	23.44539072	3.344447196	7.01024395	2.37903E-12	2.50902E-09	9
TraesCS2A02G066400.1	55.22448137	4.125277286	1.205237969	3.422790679	0.000619818	0.033051537	9
TraesCS2A02G069000.1	11.93038968	5.125746721	1.174078036	4.365763233	1.2668E-05	0.002026542	9
TraesCS2A02G072500.1	66.61917284	24.40505539	3.365164609	7.252261991	4.09868E-13	5.0744E-10	9
TraesCS2A02G078100.1	253.0713886	7.71292017	2.3509978	3.280700717	0.001035496	0.046192295	9
TraesCS2A02G095500.1	124.8051055	1.208477637	0.312607735	3.865795697	0.000110728	0.009940682	9
TraesCS2A02G101900.1	125.1593399	3.288345981	0.886208098	3.710579927	0.000206785	0.015509056	9
TraesCS2A02G107000.1	726.660621	1.707374488	0.381516032	4.475236542	7.63268E-06	0.001364077	9
TraesCS2A02G114000.1	98.05953758	2.112647802	0.633896334	3.332797004	0.000859776	0.040986281	9
TraesCS2A02G161700.1	163.184068	2.950770202	0.606595089	4.864480863	1.14758E-06	0.000318288	9
TraesCS2A02G169300.1	1050.930626	1.050666629	0.281139867	3.737166984	0.000186105	0.014479266	9
TraesCS2A02G196400.1	11.01602572	4.989785575	1.346925477	3.704574351	0.000211746	0.015762276	9
TraesCS2A02G217000.1	84.93291418	3.598586564	0.913317336	3.940127296	8.14384E-05	0.008036718	9
TraesCS2A02G218700.1	88.74596532	3.444088446	0.83658058	4.116863966	3.84063E-05	0.004620976	9
TraesCS2A02G220400.1	1333.982605	3.125952884	0.935328412	3.342091231	0.000831497	0.040017738	9
TraesCS2A02G221300.1	171.736015	3.950697559	1.166709622	3.386187517	0.000708709	0.036252819	9
TraesCS2A02G234200.1	38.50233897	31.60627948	6.558805817	4.818907643	1.44346E-06	0.000382948	9
TraesCS2A02G248800.1	40.91438992	4.0780045	0.67958901	6.000692245	1.96478E-09	1.08989E-06	9
TraesCS2A02G253900.3	30.62859417	24.34476534	6.558782997	3.711780882	0.000205806	0.015449203	9
TraesCS2A02G266000.1	16.5147188	3.285074096	0.786288184	4.177951752	2.94146E-05	0.003784295	9
TraesCS2A02G271700.1	21.66273048	3.182709246	0.783056501	4.064469476	4.81418E-05	0.005418399	9
TraesCS2A02G290800.1	7.907295164	7.00031633	2.151547	3.25361999	0.001139446	0.048889155	9
TraesCS2A02G292000.1	324.5702514	1.94980128	0.513461611	3.797365253	0.000146242	0.012188184	9
TraesCS2A02G300100.2	125.6402156	32.37740133	4.907916392	6.596974917	4.19632E-11	3.44687E-08	9
TraesCS2A02G302900.1	106.3180519	2.14798801	0.456559176	4.704730788	2.54201E-06	0.000582182	9
TraesCS2A02G304100.2	51.9442564	23.18037318	3.303079118	7.017807432	2.25377E-12	2.40663E-09	9
TraesCS2A02G318600.1	188.4872398	2.76291813	0.702374764	3.933680812	8.36549E-05	0.008176544	9
TraesCS2A02G323200.1	10.74392148	6.490551849	1.4612569	4.44175959	8.92262E-06	0.001542963	9
TraesCS2A02G335200.1	509.7808093	1.091572501	0.238739808	4.572226593	4.82569E-06	0.000969974	9
TraesCS2A02G336000.2	522.986741	1.833386583	0.38848902	4.719275168	2.36686E-06	0.000558696	9
TraesCS2A02G337300.2	104.5305733	49.64708609	6.047518034	8.209497816	2.22116E-16	4.74361E-13	9
TraesCS2A02G338800.1	18.1396912	3.298548929	0.798163369	4.132673908	3.58567E-05	0.004394687	9
TraesCS2A02G349200.2	56.7400097	10.10108492	2.8745631	3.51395484	0.000441488	0.026172479	9
TraesCS2A02G350700.1	196.1330371	2.610540858	0.804020807	3.246857338	0.001166869	0.049626609	9
TraesCS2A02G350800.1	840.4008042	3.020820978	0.719543433	4.198246887	2.68989E-05	0.003568118	9
TraesCS2A02G350900.1	1383.775322	3.195467093	0.711588653	4.490609961	7.10195E-06	0.001299125	9
TraesCS2A02G352000.1	31.12879378	6.799942821	0.987906587	6.883184004	5.85293E-12	5.81387E-09	9
TraesCS2A02G355300.1	7.460332744	7.091445993	1.702193153	4.166064222	3.09903E-05	0.003927334	9
TraesCS2A02G367700.1	388.9829408	4.188744824	1.147891369	3.649077724	0.000263183	0.018189896	9
TraesCS2A02G368000.1	12.27784904	3.055940506	0.930126726	3.285509837	0.00101798	0.045841829	9
TraesCS2A02G373200.2	63.99810307	2.427272221	0.705542023	3.440294329	0.000581082	0.031840604	9
TraesCS2A02G380800.1	167.2737006	4.321535161	1.019821523	4.237540652	2.25982E-05	0.003154362	9
TraesCS2A02G380900.1	300.3326343	3.180300387	0.838930564	3.790898227	0.000150103	0.012452275	9
TraesCS2A02G381000.1	67.79378582	3.549463028	0.916709704	3.871959698	0.000107964	0.0097597	9
TraesCS2A02G383300.1	59.37632256	1.981877934	0.458880723	4.318939182	1.56781E-05	0.002369464	9
TraesCS2A02G394900.1	114.0106184	7.873174362	1.860134141	4.232584194	2.31021E-05	0.003214207	9
TraesCS2A02G395000.1	2585.919488	3.15317261	0.877736279	3.592391797	0.000327657	0.021220927	9
TraesCS2A02G399200.1	213.846782	3.070927079	0.71793767	4.27742854	1.89065E-05	0.002737463	9
TraesCS2A02G401000.1	151.7173596	2.74073443	0.701023318	3.909619491	9.24416E-05	0.008749874	9
TraesCS2A02G421500.1	315.1556831	3.418451863	0.888129704	3.84904575	0.000118579	0.010429988	9
TraesCS2A02G421800.1	18.23293806	22.181413	2.495043889	8.890189506	6.10048E-19	2.17141E-15	9
TraesCS2A02G422100.1	73.58975631	3.862901699	1.111389551	3.475740522	0.000509445	0.028994113	9
TraesCS2A02G436800.2	52.83203239	45.74688816	5.628757727	8.12735072	4.38774E-16	9.14213E-13	9
TraesCS2A02G445100.1	49.73775383	2.407796688	0.737870921	3.263167878	0.001101742	0.047970154	9
TraesCS2A02G451500.1	30.08712523	6.045611598	1.477156521	4.09273595	4.26313E-05	0.004998351	9
TraesCS2A02G453300.1	20.35839706	5.274967168	1.141195439	4.622317077	3.79477E-06	0.000810431	9
TraesCS2A02G457600.1	41.65976732	41.25170038	6.560141361	6.288233456	3.21099E-10	2.1452E-07	9
TraesCS2A02G457900.3	51.8714618	51.00863061	6.448494494	7.910161149	2.57056E-15	4.57485E-12	9
TraesCS2A02G459800.1	154.3240239	41.21524172	3.894168676	10.58383577	3.54156E-26	2.52118E-22	9
TraesCS2A02G464300.4	8.658391816	37.39323625	4.657271748	8.029000297	9.82701E-16	1.90791E-12	9
TraesCS2A02G473100.1	28.85182006	8.045663485	2.292325971	3.509825211	0.000448401	0.026380946	9
TraesCS2A02G486600.1	121.2395464	4.004948922	1.08069334	3.705906915	0.000210636	0.015701363	9
TraesCS2A02G493600.2	2772.705057	2.189615233	0.457079092	4.790451526	1.66406E-06	0.00042689	9
TraesCS2A02G504800.1	345.5494571	5.156608012	1.577000928	3.269882675	0.001075921	0.047435847	9
TraesCS2A02G505400.1	108.9721286	8.442844937	1.980371117	4.263264023	2.01462E-05	0.00286358	9
TraesCS2A02G517500.1	55.96159731	23.14924205	3.582823168	6.461173486	1.03894E-10	7.85421E-08	9
TraesCS2A02G522100.1	45.36001757	7.200949179	1.230969662	5.849818562	4.9211E-09	2.5173E-06	9
TraesCS2A02G570700.1	112.6533382	2.209075891	0.589852584	3.745132174	0.000180299	0.014097917	9
TraesCS2B02G005300.2	64.94036428	23.85052714	2.711367828	8.796492637	1.41159E-18	4.46616E-15	9
TraesCS2B02G005700.1	28.99713016	5.097783815	1.367388361	3.728117014	0.000192916	0.014753828	9
TraesCS2B02G029200.1	339.948024	7.585474708	2.14491491	3.536492135	0.000405479	0.02463614	9
TraesCS2B02G043300.1	39.55242164	4.570989076	1.318725734	3.466216636	0.000527838	0.029704263	9
TraesCS2B02G043700.1	140.8048138	4.082418464	1.112726609	3.668842311	0.000243651	0.017230261	9
TraesCS2B02G062500.1	352.4143193	3.194166652	0.826778783	3.8633873	0.000111825	0.009971613	9
TraesCS2B02G078600.1	12.66691531	5.231831669	1.307863008	4.000290272	6.32648E-05	0.006639388	9
TraesCS2B02G078700.1	41.12956495	4.28358034	1.100321429	3.893026371	9.90014E-05	0.009143019	9
TraesCS2B02G093100.1	298.8183549	7.930663045	1.503050435	5.276378529	1.31762E-07	4.85167E-05	9
TraesCS2B02G119200.2	377.9093591	1.978929638	0.556246597	3.557648077	0.00037419	0.023281551	9
TraesCS2B02G120700.1	49.68779417	1.855912821	0.495714147	3.7439174	0.000181173	0.014147079	9
TraesCS2B02G149000.2	65.92719062	23.99009013	5.204766109	4.609254215	4.04116E-06	0.000850296	9
TraesCS2B02G185800.2	11.73772746	25.18046754	5.882981494	4.280222123	1.86707E-05	0.002712521	9
TraesCS2B02G187700.1	134.0132548	3.205412549	0.922224876	3.475738545	0.000509449	0.028994113	9
TraesCS2B02G196000.1	37.07882802	2.472710909	0.72879402	3.39288035	0.000691618	0.035677654	9
TraesCS2B02G196300.1	33.76532357	8.826198339	2.054671275	4.295674177	1.74163E-05	0.002578521	9
TraesCS2B02G201500.1	11.61373604	3.751217415	1.115749171	3.362061575	0.000773629	0.038467989	9
TraesCS2B02G202600.3	30.5839714	8.986279176	2.087321924	4.305171652	1.66856E-05	0.002487586	9
TraesCS2B02G210900.1	14.49198278	3.71249041	1.096650337	3.385300022	0.000711005	0.036283339	9
TraesCS2B02G212400.1	16.27525002	4.360700554	1.177710504	3.702693098	0.000213323	0.015810994	9
TraesCS2B02G225200.3	62.52757853	34.64328001	6.559240934	5.281598947	1.28061E-07	4.73583E-05	9
TraesCS2B02G228500.1	137.5589968	1.259787023	0.316880955	3.975584527	7.02066E-05	0.00719121	9
TraesCS2B02G241600.1	36.25136133	2.884370612	0.813172894	3.547057005	0.00038956	0.023958659	9
TraesCS2B02G244100.1	249.8140937	4.538138639	1.130257195	4.015138023	5.9411E-05	0.006374016	9
TraesCS2B02G255100.3	40.55350663	22.30718668	4.769035564	4.677504787	2.90387E-06	0.000651091	9
TraesCS2B02G259100.1	51.26612815	43.90802047	6.559036574	6.69427895	2.16738E-11	1.8515E-08	9
TraesCS2B02G260300.1	39.69708826	9.079791352	2.596497852	3.496937748	0.000470632	0.027331189	9
TraesCS2B02G263900.1	52.69699062	4.894659838	0.693216896	7.060791318	1.65557E-12	1.86091E-09	9
TraesCS2B02G278700.1	106.5558276	24.29789408	5.118283565	4.747273919	2.06177E-06	0.000496137	9
TraesCS2B02G289500.4	108.7687389	9.26961169	2.729432937	3.396167594	0.000683365	0.035386307	9
TraesCS2B02G289900.1	57.13997203	2.371396315	0.5731081	4.137781888	3.50679E-05	0.004341615	9
TraesCS2B02G290000.1	130.3966166	1.891845379	0.576343947	3.282493704	0.001028933	0.046043801	9
TraesCS2B02G303300.2	52.63235366	48.02121201	3.783698317	12.69160699	6.58212E-37	1.40571E-32	9
TraesCS2B02G303600.1	10.05874037	6.513419578	1.981002662	3.287940851	0.00100923	0.045543855	9
TraesCS2B02G305900.1	244.185483	2.145200832	0.641695217	3.343021384	0.000828715	0.039928832	9
TraesCS2B02G307200.1	8.560541311	4.926711254	1.27894237	3.852176119	0.000117073	0.010331672	9
TraesCS2B02G308500.1	322.1040722	2.11512009	0.642031387	3.294418515	0.000986255	0.04493432	9
TraesCS2B02G309500.1	91.76388972	24.98542052	3.036063404	8.229545037	1.87926E-16	4.11635E-13	9
TraesCS2B02G319600.1	75.2906538	2.221317219	0.464901578	4.778037596	1.77014E-06	0.000443449	9
TraesCS2B02G322400.1	275.06096	1.407083155	0.322361316	4.364925588	1.27166E-05	0.002030521	9
TraesCS2B02G336900.1	42.63637522	4.39772762	1.217756427	3.611335998	0.000304624	0.020079308	9
TraesCS2B02G343400.1	122.8340251	1.293232024	0.349367866	3.701634147	0.000214215	0.015847477	9
TraesCS2B02G359400.1	14.26064274	7.854881828	1.64508866	4.774746808	1.79933E-06	0.000446831	9
TraesCS2B02G369100.1	2174.919644	2.757597581	0.748411644	3.684600052	0.000229062	0.016596992	9
TraesCS2B02G370200.1	22.21634608	3.800422969	0.917076084	4.144065072	3.41203E-05	0.004242736	9
TraesCS2B02G376100.2	70.75079562	10.44134387	2.326208715	4.488567083	7.17038E-06	0.00130884	9
TraesCS2B02G397500.1	9.288379373	2.487301621	0.760683625	3.269824064	0.001076144	0.047435847	9
TraesCS2B02G398000.1	94.16273419	36.7982377	5.592169079	6.580315647	4.69451E-11	3.78333E-08	9
TraesCS2B02G398100.1	34.56394418	4.17792925	1.136591276	3.675841386	0.000237067	0.016961195	9
TraesCS2B02G398100.2	28.27689508	4.247241867	1.151849036	3.687325104	0.000226624	0.016476222	9
TraesCS2B02G398200.1	140.1273385	3.477875533	0.970702196	3.582845025	0.000339872	0.021736499	9
TraesCS2B02G398300.1	16.07294439	3.691660816	1.084456371	3.404157987	0.000663684	0.034676349	9
TraesCS2B02G413000.1	1183.641502	2.989235539	0.891816255	3.351851375	0.000802731	0.039387765	9
TraesCS2B02G419100.1	260.4889828	1.72561381	0.470160249	3.670267349	0.000242297	0.017177142	9
TraesCS2B02G434100.1	24.25539562	3.671177762	0.816962471	4.493692049	6.99988E-06	0.001285961	9
TraesCS2B02G437300.1	69.66452295	7.928339019	2.225489915	3.562514017	0.00036732	0.023072576	9
TraesCS2B02G438400.1	40.66252645	23.34079047	6.559130611	3.558518933	0.000372952	0.023238359	9
TraesCS2B02G440700.1	31.0460268	2.722838953	0.665915988	4.088862562	4.33494E-05	0.005035598	9
TraesCS2B02G443500.1	29.37965515	4.387650416	1.041975364	4.210896503	2.54359E-05	0.003451565	9
TraesCS2B02G446100.1	435.5956919	1.991984979	0.599069272	3.325132958	0.000883764	0.041595816	9
TraesCS2B02G449100.2	24.01851675	24.04459446	3.416755157	7.037260019	1.96057E-12	2.12004E-09	9
TraesCS2B02G451400.1	36.24243607	3.559541323	1.039203782	3.425258246	0.000614215	0.032958515	9
TraesCS2B02G454500.1	150.9347696	4.481593942	1.328339264	3.373832321	0.000741295	0.037272439	9
TraesCS2B02G472800.1	113.055968	3.002928528	0.908610326	3.304968524	0.000949871	0.043658789	9
TraesCS2B02G474600.1	24.77592483	4.660021663	0.807590854	5.770275429	7.91421E-09	3.95368E-06	9
TraesCS2B02G489600.2	930.1911257	1.295247094	0.380065592	3.407956739	0.000654513	0.034370425	9
TraesCS2B02G499700.1	8.090753202	2.63162505	0.809122827	3.25244198	0.00114418	0.04904299	9
TraesCS2B02G521100.1	208.1484952	3.146036922	0.940246563	3.345970138	0.000819952	0.039685689	9
TraesCS2B02G521200.1	197.8155593	4.358724838	1.160221052	3.756805507	0.000172096	0.013701291	9
TraesCS2B02G521600.2	1651.43318	2.137663269	0.626317418	3.413066934	0.000642362	0.033914947	9
TraesCS2B02G529400.1	51.05664411	2.512543177	0.702559383	3.576271614	0.00034853	0.022180625	9
TraesCS2B02G533900.2	17.60113368	40.23072024	5.419936431	7.422729169	1.14731E-13	1.63351E-10	9
TraesCS2B02G551800.1	51.76785492	4.51521633	0.757974104	5.956953288	2.56984E-09	1.39829E-06	9
TraesCS2B02G569100.1	127.4167679	2.662398164	0.718239047	3.706841304	0.00020986	0.015684382	9
TraesCS2B02G574500.1	181.4931536	5.254167406	1.34463718	3.907498232	9.32567E-05	0.0087931	9
TraesCS2B02G598600.2	32.02099848	3.740247208	1.100967962	3.397235286	0.000680704	0.03531243	9
TraesCS2B02G603500.1	82.819882	4.198947027	0.844111815	4.974396703	6.54512E-07	0.00019757	9
TraesCS2B02G612100.1	105.7920177	3.673214786	1.121113	3.276400135	0.001051395	0.046706427	9
TraesCS2B02G624100.2	32.30312451	23.35583941	4.084385061	5.71832456	1.0758E-08	5.16297E-06	9
TraesCS2D02G000200.1	428.9764572	2.687159467	0.80718581	3.329046958	0.000871437	0.041359651	9
TraesCS2D02G008200.1	338.394777	1.162213473	0.340355985	3.414699683	0.000638524	0.033733164	9
TraesCS2D02G013300.1	124.988137	3.148083004	0.923410611	3.409190847	0.000651559	0.034277833	9
TraesCS2D02G017500.1	162.3885455	4.476463279	1.26450448	3.540092859	0.000399986	0.024424036	9
TraesCS2D02G021600.1	626.3731649	8.450690292	2.184993566	3.867604201	0.00010991	0.009904178	9
TraesCS2D02G047500.1	429.2154043	4.604360659	1.10528789	4.165756903	3.10321E-05	0.003927334	9
TraesCS2D02G063100.1	107.9851744	1.19221299	0.326432095	3.652254202	0.000259948	0.018075028	9
TraesCS2D02G066000.1	679.8167112	2.248343398	0.575687267	3.905494401	9.40329E-05	0.008837027	9
TraesCS2D02G066300.1	66.13629912	2.738072343	0.741229074	3.69396242	0.000220786	0.016217457	9
TraesCS2D02G066400.1	56.67766709	2.123796806	0.605031328	3.510226177	0.000447726	0.026359348	9
TraesCS2D02G067600.1	13.86495987	2.789854807	0.789240667	3.534859422	0.000407992	0.024689507	9
TraesCS2D02G079200.1	84.21016026	2.024885518	0.592047134	3.420142422	0.000625884	0.033291863	9
TraesCS2D02G081400.1	504.2003586	3.802658927	1.106901245	3.435409387	0.000591659	0.032131651	9
TraesCS2D02G084300.2	61.23988212	23.11515722	3.848519093	6.006247252	1.89867E-09	1.0601E-06	9
TraesCS2D02G094000.1	96.38364784	1.140580501	0.337760963	3.376886696	0.000733112	0.037091999	9
TraesCS2D02G103800.1	25.85203401	2.170710858	0.594062716	3.654009583	0.000258177	0.018053064	9
TraesCS2D02G106800.1	1387.060826	1.722272362	0.429472735	4.010201862	6.06669E-05	0.006421967	9
TraesCS2D02G107100.1	55.07833805	3.656362737	0.635691705	5.751786134	8.83055E-09	4.35237E-06	9
TraesCS2D02G114500.2	64.76915679	32.04954813	6.562332564	4.883865275	1.04026E-06	0.00029041	9
TraesCS2D02G114800.1	56.39274009	3.566178029	0.949965597	3.754007557	0.00017403	0.013783079	9
TraesCS2D02G117500.1	15.08618544	47.53884756	4.2018619	11.31375773	1.1218E-29	1.36901E-25	9
TraesCS2D02G129600.2	64.29756565	23.60386473	4.022435994	5.868052286	4.40944E-09	2.29684E-06	9
TraesCS2D02G150400.1	35.90211467	3.358132425	0.857913659	3.914301155	9.06664E-05	0.008625022	9
TraesCS2D02G153100.1	54.71340204	8.399009604	2.465231998	3.406985472	0.000656846	0.034445516	9
TraesCS2D02G156200.1	17.25581151	3.608313749	1.10810517	3.256291772	0.001128777	0.048673557	9
TraesCS2D02G165100.1	31.81886313	5.770102315	1.756440381	3.285111397	0.001019421	0.04588252	9
TraesCS2D02G176800.1	1124.369165	1.689390739	0.361305416	4.675796891	2.92814E-06	0.000654592	9
TraesCS2D02G183400.1	7.569571857	5.732529625	1.710558908	3.351261156	0.000804444	0.039426525	9
TraesCS2D02G191800.1	132.1027739	3.644767794	1.094124306	3.331219108	0.000864665	0.041196255	9
TraesCS2D02G201200.1	17.97668453	7.906840712	2.257095474	3.503104234	0.000459869	0.026870595	9
TraesCS2D02G225200.1	26.38273268	23.28301024	5.745140202	4.052644396	5.06419E-05	0.005625668	9
TraesCS2D02G226000.1	805.7606618	3.491009433	0.790305758	4.417289633	9.99463E-06	0.001687354	9
TraesCS2D02G227000.1	100.9239082	4.174741318	1.197708871	3.485606076	0.000491023	0.028189633	9
TraesCS2D02G229100.3	26.60877144	22.84419782	6.559980395	3.482357636	0.000497019	0.028467053	9
TraesCS2D02G234500.1	143.6960584	24.12377116	4.236197248	5.694676087	1.23606E-08	5.83381E-06	9
TraesCS2D02G234500.2	80.4892449	24.38800409	4.576128119	5.329397136	9.85393E-08	3.77481E-05	9
TraesCS2D02G237200.3	6.998041057	6.183256253	1.767556764	3.498193879	0.00046842	0.027239815	9
TraesCS2D02G237400.1	29.72253886	40.82515795	6.558715824	6.22456576	4.82892E-10	2.96773E-07	9
TraesCS2D02G250500.1	70.47889912	4.181816903	0.644336536	6.490112956	8.5772E-11	6.54211E-08	9
TraesCS2D02G267600.1	49.88234541	23.74338365	4.205491303	5.64580496	1.6441E-08	7.51064E-06	9
TraesCS2D02G270300.1	28.7367799	3.655360918	0.894130754	4.088172677	4.34784E-05	0.005039606	9
TraesCS2D02G286200.8	30.35818847	30.86796111	6.558876016	4.706288248	2.52268E-06	0.000579307	9
TraesCS2D02G288000.1	51.52272244	1.350619663	0.414344722	3.259652148	0.001115489	0.048295754	9
TraesCS2D02G295500.1	181.5495188	25.24779398	6.10287876	4.13703024	3.5183E-05	0.004349553	9
TraesCS2D02G301100.2	177.9876639	25.45816143	3.750967919	6.78709122	1.14417E-11	1.05099E-08	9
TraesCS2D02G301600.1	110.8235409	2.516434034	0.508312578	4.950564169	7.39987E-07	0.00021678	9
TraesCS2D02G306700.1	8.087682871	3.777671626	1.118501777	3.377439093	0.000731642	0.037048732	9
TraesCS2D02G307600.3	85.06637845	23.58061146	3.671059333	6.423380642	1.33281E-10	9.8152E-08	9
TraesCS2D02G312900.1	9.090647012	4.349153545	0.987630458	4.403624363	1.06457E-05	0.001776214	9
TraesCS2D02G316300.1	82.12895958	4.234953217	1.152332268	3.675114665	0.000237743	0.016976544	9
TraesCS2D02G317800.1	50.61086419	4.758607372	1.380981368	3.445815768	0.000569338	0.031398515	9
TraesCS2D02G330100.1	7.083551418	3.934951731	1.084792934	3.627375887	0.000286316	0.019319794	9
TraesCS2D02G348900.1	1350.225763	2.39116111	0.593746237	4.027244234	5.64344E-05	0.006133315	9
TraesCS2D02G349000.1	1099.232236	2.127267688	0.642245252	3.312235756	0.000925535	0.042923325	9
TraesCS2D02G349400.1	708.9379066	3.869247629	1.094487325	3.535214654	0.000407444	0.024689507	9
TraesCS2D02G350200.1	17.25406946	3.811707465	0.816855586	4.666317437	3.06646E-06	0.000678641	9
TraesCS2D02G354300.1	203.5598329	1.326223374	0.382912664	3.463514003	0.000533169	0.029905766	9
TraesCS2D02G364600.1	290.5658229	5.849199609	1.181584738	4.950300577	7.4099E-07	0.00021678	9
TraesCS2D02G375400.1	48.00234904	3.424902475	0.979279158	3.497370945	0.000469868	0.027305403	9
TraesCS2D02G377200.1	1077.970391	2.776966747	0.743577208	3.734604447	0.00018801	0.014534884	9
TraesCS2D02G377500.1	46.93048207	3.311439251	0.809629335	4.090068266	4.31246E-05	0.005032738	9
TraesCS2D02G377600.1	79.23639845	3.157121981	0.565824709	5.579682068	2.40959E-08	1.07209E-05	9
TraesCS2D02G379600.1	92.04191271	1.795691614	0.498014698	3.605700032	0.000311313	0.020394316	9
TraesCS2D02G392800.1	2069.21291	2.972870948	0.907031458	3.277583066	0.001046999	0.04655958	9
TraesCS2D02G396700.1	321.1955087	4.609970304	0.853344739	5.402236741	6.5815E-08	2.65203E-05	9
TraesCS2D02G398500.1	171.8709507	2.070040477	0.436651422	4.740716214	2.12964E-06	0.000508175	9
TraesCS2D02G418600.1	1017.85943	5.65609605	1.138997312	4.965855487	6.83989E-07	0.000204874	9
TraesCS2D02G420500.1	9.64199785	5.54473842	1.477640867	3.75242628	0.000175131	0.013826959	9
TraesCS2D02G421700.1	13.84530525	4.791633548	1.230321999	3.894617467	9.83538E-05	0.009122664	9
TraesCS2D02G431500.1	484.2705215	5.72286362	1.403320709	4.078086771	4.54078E-05	0.005144574	9
TraesCS2D02G443100.2	55.92859268	23.30405509	4.061216213	5.738196114	9.56903E-09	4.67111E-06	9
TraesCS2D02G452900.1	120.8352718	2.335616376	0.558743822	4.180120269	2.91355E-05	0.003765399	9
TraesCS2D02G496100.1	16.13089775	27.45819328	6.560796679	4.185191924	2.84925E-05	0.003716034	9
TraesCS2D02G503600.1	349.7057169	2.768588204	0.782318683	3.538951919	0.000401719	0.024459906	9
TraesCS2D02G531000.1	22.98953326	5.776292233	1.442679291	4.003864386	6.23161E-05	0.00655329	9
TraesCS2D02G537100.1	40.02300527	4.740714648	1.344896454	3.524966278	0.000423537	0.025343008	9
TraesCS2D02G540000.1	333.4769542	2.800417317	0.81359387	3.442033451	0.000577359	0.031738389	9
TraesCS2D02G544600.1	31.34320709	2.459220201	0.750179516	3.278175622	0.001044804	0.046486146	9
TraesCS2D02G547300.1	13.94797821	3.778962623	1.112379125	3.397189447	0.000680818	0.03531243	9
TraesCS2D02G549200.2	33.04927435	36.65698125	6.558722969	5.589042473	2.28325E-08	1.02657E-05	9
TraesCS2D02G553000.2	99.32642478	24.44424558	4.269006619	5.725979778	1.02838E-08	4.96332E-06	9
TraesCS2D02G566800.1	43.52384823	8.068059527	2.403898531	3.356239635	0.000790101	0.039037101	9
TraesCS2D02G571200.2	96.86691034	24.14203519	3.230080639	7.474127704	7.77176E-14	1.12527E-10	9
TraesCS2D02G582200.1	88.30481004	4.194004381	0.782097548	5.362508031	8.20743E-08	3.2015E-05	9
TraesCS2D02G583200.1	561.8148226	2.874377506	0.834885351	3.442840986	0.000575638	0.03170498	9
TraesCS2D02G584400.2	14.54422211	23.26795685	3.584160635	6.491884495	8.47692E-11	6.52387E-08	9
TraesCS2D02G587800.2	23.85657825	41.12053301	5.99116339	6.863530559	6.71791E-12	6.59637E-09	9
TraesCS2D02G589200.1	219.9499582	8.063494047	2.38652564	3.378758607	0.000728139	0.036915141	9
TraesCS2D02G595500.1	58.11556052	3.505103274	1.017040782	3.446374361	0.000568163	0.031374186	9
TraesCS2D02G598200.1	127.8631794	3.08874947	0.888834953	3.475054012	0.000510751	0.029040482	9
TraesCS2D02G601500.1	149.5311082	3.1099489	0.781303539	3.980461813	6.87815E-05	0.007113474	9
TraesCS3A02G000400.1	42.72128413	3.753279274	0.688437146	5.451883729	4.9839E-08	2.05679E-05	9
TraesCS3A02G000600.1	12.13144079	3.326525802	0.860959439	3.863742764	0.000111663	0.009971613	9
TraesCS3A02G015500.2	104.8507483	9.463966364	2.801228323	3.378505881	0.000728809	0.036927174	9
TraesCS3A02G037700.1	173.4605966	3.533644693	0.924154466	3.823651591	0.00013149	0.011165644	9
TraesCS3A02G042700.1	108.9484758	2.766970462	0.748562268	3.69637982	0.000218696	0.016091559	9
TraesCS3A02G046000.2	17.94489542	8.481429678	1.84433059	4.598649356	4.25239E-06	0.000886011	9
TraesCS3A02G046100.2	23.29277849	7.76110298	1.76877481	4.387841198	1.14481E-05	0.001887969	9
TraesCS3A02G061600.1	1265.000421	6.651765323	1.401103756	4.747518015	2.05928E-06	0.000496137	9
TraesCS3A02G105800.2	26.29790815	7.556392911	1.969208297	3.837274565	0.000124407	0.010778522	9
TraesCS3A02G106700.2	113.8259297	1.470772948	0.378152431	3.889365308	0.000100507	0.009262015	9
TraesCS3A02G109300.1	95.2779942	4.886342277	0.845380382	5.780051658	7.46777E-09	3.7748E-06	9
TraesCS3A02G111400.1	367.0342475	1.517681786	0.319426484	4.751270987	2.02142E-06	0.000489184	9
TraesCS3A02G127300.1	192.2572327	4.83518681	1.312568047	3.683760868	0.000229818	0.016623556	9
TraesCS3A02G141100.1	114.0277609	5.132261064	1.576179184	3.25614062	0.001129378	0.048673557	9
TraesCS3A02G185900.1	8.15438337	4.890137556	1.500113474	3.259845099	0.001114731	0.048295754	9
TraesCS3A02G192400.2	99.26411211	24.07026582	4.786902482	5.028359344	4.94694E-07	0.000154067	9
TraesCS3A02G199400.13	20.95037608	23.89908962	3.362552704	7.107424545	1.18228E-12	1.34664E-09	9
TraesCS3A02G207500.1	37.65752306	36.48606738	6.558990811	5.562756288	2.65547E-08	1.16931E-05	9
TraesCS3A02G215000.1	319.6543086	3.129680467	0.692747314	4.51778073	6.24911E-06	0.001181055	9
TraesCS3A02G220600.1	121.0070385	45.78656785	5.230197737	8.7542709	2.05427E-18	6.26744E-15	9
TraesCS3A02G221700.1	67.71183394	41.10199318	6.525655755	6.298523049	3.00495E-10	2.05361E-07	9
TraesCS3A02G221800.1	47.19278656	2.037769582	0.431549085	4.721987958	2.33551E-06	0.000554202	9
TraesCS3A02G225100.1	30.33130486	4.970973111	1.047286329	4.746527262	2.06939E-06	0.000496572	9
TraesCS3A02G242600.1	16.78568227	3.042573528	0.838683359	3.627797659	0.000285849	0.019303517	9
TraesCS3A02G255000.4	25.80358631	20.90183845	5.346188336	3.909671178	9.24218E-05	0.008749874	9
TraesCS3A02G258000.1	1278.763283	4.494659934	1.050568048	4.27831395	1.88314E-05	0.002731229	9
TraesCS3A02G258100.2	415.6815224	1.568709786	0.42664867	3.676818648	0.000236161	0.016924726	9
TraesCS3A02G259200.2	47.19960413	22.72800519	3.951923127	5.751125329	8.86514E-09	4.35237E-06	9
TraesCS3A02G260100.1	68.08145	6.423614041	1.505157977	4.267734112	1.97468E-05	0.002826329	9
TraesCS3A02G260200.1	26.3183491	7.032857287	1.755815822	4.005464125	6.18958E-05	0.006519745	9
TraesCS3A02G288800.2	132.7642452	8.475247676	1.953573796	4.338329934	1.4357E-05	0.002218951	9
TraesCS3A02G291100.1	119.0567515	3.407458962	0.690858143	4.932212202	8.13035E-07	0.000230745	9
TraesCS3A02G294000.1	37.7016088	5.902618325	1.196576799	4.932920586	8.10091E-07	0.000230676	9
TraesCS3A02G297100.1	425.9447498	6.78297712	1.520000681	4.462482949	8.10154E-06	0.001424037	9
TraesCS3A02G297200.1	2047.390187	6.689846813	1.32345776	5.054824578	4.30787E-07	0.000137829	9
TraesCS3A02G301500.2	22.77769356	23.65692368	6.558883411	3.606852294	0.000309934	0.020335191	9
TraesCS3A02G301800.2	253.1009443	1.152047846	0.312802736	3.682985196	0.000230519	0.01663735	9
TraesCS3A02G303200.1	684.0043746	3.924457967	0.723284028	5.425887779	5.76672E-08	2.35707E-05	9
TraesCS3A02G307600.1	130.504356	3.225472096	0.919469034	3.50797251	0.000451536	0.026489665	9
TraesCS3A02G311100.1	12.69801315	7.734162512	1.975105191	3.91582309	9.00963E-05	0.008599516	9
TraesCS3A02G322100.1	285.9820728	2.717077113	0.710546511	3.82392577	0.000131343	0.011165644	9
TraesCS3A02G323100.3	118.4920062	24.88450446	5.11807334	4.862084384	1.16156E-06	0.000321125	9
TraesCS3A02G325300.2	24.52673981	3.742330692	1.061943826	3.524038278	0.000425023	0.025407979	9
TraesCS3A02G327300.1	647.828317	4.911502075	1.221420182	4.021140428	5.79171E-05	0.006254896	9
TraesCS3A02G336000.1	42.21749949	2.456809599	0.739869986	3.320596384	0.000898253	0.042060714	9
TraesCS3A02G342900.1	128.5052949	3.123578598	0.521506275	5.989532143	2.10446E-09	1.15241E-06	9
TraesCS3A02G343900.1	15.90440407	4.96990333	1.419634799	3.500832279	0.000463808	0.027038642	9
TraesCS3A02G356100.1	186.8687066	6.774387691	2.088004051	3.244432254	0.00117685	0.049936837	9
TraesCS3A02G363700.3	69.66401622	21.47993861	4.950218219	4.339190246	1.43009E-05	0.002218951	9
TraesCS3A02G380600.1	163.893469	2.963352468	0.912022218	3.24921083	0.001157257	0.049429906	9
TraesCS3A02G397900.1	20.21054537	2.658323434	0.660413105	4.025243314	5.69164E-05	0.006170233	9
TraesCS3A02G400000.1	285.4399403	2.10958157	0.534472884	3.947031985	7.9126E-05	0.007849962	9
TraesCS3A02G436500.2	30.06081329	23.95405148	6.558866402	3.652163349	0.00026004	0.018075028	9
TraesCS3A02G440800.1	96.32233064	1.344660609	0.302019325	4.452233674	8.49816E-06	0.0014842	9
TraesCS3A02G446600.1	687.7544895	3.588663468	0.918967272	3.905104761	9.41846E-05	0.008841551	9
TraesCS3A02G454900.1	87.81199941	3.204866626	0.975971737	3.283769912	0.001024285	0.04602746	9
TraesCS3A02G480400.1	643.7779285	3.972081547	0.914882381	4.341630825	1.41429E-05	0.002200677	9
TraesCS3A02G482200.1	1711.382042	4.384157715	0.949956278	4.615115258	3.92877E-06	0.000832802	9
TraesCS3A02G483000.1	1448.850454	4.476245454	1.019058545	4.392530217	1.12039E-05	0.001854854	9
TraesCS3A02G483100.1	25.77313724	8.106589249	1.963526102	4.128587464	3.64999E-05	0.004454339	9
TraesCS3A02G488600.1	290.5689739	2.349872801	0.60024316	3.914868104	9.04536E-05	0.008617063	9
TraesCS3A02G489800.1	21.71306761	2.36249854	0.625136843	3.779170219	0.000157352	0.01290531	9
TraesCS3A02G494800.1	35.68968841	2.464767872	0.752228177	3.276622634	0.001050567	0.046693922	9
TraesCS3A02G517100.1	1310.031568	3.169556766	0.845586928	3.748351189	0.000178001	0.013994458	9
TraesCS3B02G002200.1	30.19669838	3.021937345	0.671813387	4.498179706	6.85378E-06	0.001270045	9
TraesCS3B02G002300.1	17.33318134	4.26362479	0.903592114	4.718528109	2.37557E-06	0.000558696	9
TraesCS3B02G009600.1	73.35632122	5.415035338	1.438273076	3.76495634	0.000166578	0.013361604	9
TraesCS3B02G017100.2	7.981332142	32.82872492	6.55963963	5.004653726	5.59625E-07	0.000171939	9
TraesCS3B02G024000.1	7.174714227	3.732508415	1.04087302	3.585940208	0.000335866	0.021540301	9
TraesCS3B02G045900.1	101.4103086	3.346664899	0.816481407	4.098886845	4.15142E-05	0.004922133	9
TraesCS3B02G052600.1	97.52044735	2.50026498	0.731920859	3.416031867	0.000635408	0.033630962	9
TraesCS3B02G059700.1	219.1979067	5.464921154	1.428368543	3.825988174	0.000130249	0.011113661	9
TraesCS3B02G112100.1	107.2577856	1.960978174	0.516145673	3.799272718	0.000145121	0.01214215	9
TraesCS3B02G123100.1	49.22434534	2.721076553	0.806489069	3.373978218	0.000740902	0.037272439	9
TraesCS3B02G123200.1	18.70829916	4.879375563	1.347416779	3.62128158	0.000293147	0.019625702	9
TraesCS3B02G125400.1	107.637094	1.79904263	0.542510468	3.316143628	0.000912689	0.042535395	9
TraesCS3B02G128500.1	35.22769654	4.228643482	0.873589739	4.84053703	1.29489E-06	0.000351165	9
TraesCS3B02G131700.3	15.03868456	39.31745793	3.496710478	11.24412735	2.47532E-29	2.63035E-25	9
TraesCS3B02G140300.1	17.51934678	4.704433032	1.055523503	4.456966632	8.31275E-06	0.001455175	9
TraesCS3B02G163400.1	28.14983139	3.078153951	0.810303699	3.798765767	0.000145418	0.012155103	9
TraesCS3B02G205800.1	189.1630626	8.251076449	2.4805368	3.326326967	0.000879986	0.041522593	9
TraesCS3B02G208200.3	25.10413015	8.526854736	2.626252993	3.246775829	0.001167203	0.049626609	9
TraesCS3B02G214900.1	278.9341631	1.454218554	0.442173537	3.288795985	0.001006169	0.045523768	9
TraesCS3B02G215500.1	8.286963234	4.244591562	1.105325783	3.840127161	0.000122971	0.01068306	9
TraesCS3B02G226300.5	82.70130368	25.02103963	4.790833958	5.222689797	1.76343E-07	6.17387E-05	9
TraesCS3B02G228800.3	19.88861941	22.62034383	5.060825317	4.469694648	7.83313E-06	0.001391171	9
TraesCS3B02G236700.6	9.940371248	23.14352055	3.077390891	7.520500767	5.45668E-14	8.32398E-11	9
TraesCS3B02G246300.1	86.02001657	3.961963014	1.001749811	3.955042437	7.65211E-05	0.007672405	9
TraesCS3B02G274100.1	295.8903141	1.376761616	0.377486036	3.647185552	0.000265128	0.018309511	9
TraesCS3B02G290700.1	22.83434835	4.824919583	1.483706215	3.251937299	0.001146213	0.04905631	9
TraesCS3B02G293100.1	16.05502648	7.351823992	2.138670741	3.437567014	0.000586965	0.031998795	9
TraesCS3B02G293200.1	228.4522697	5.865884852	1.229173149	4.772220137	1.82206E-06	0.000451164	9
TraesCS3B02G300300.1	95.94036704	2.643201043	0.791927895	3.337678921	0.000844813	0.04052162	9
TraesCS3B02G310100.1	112.4080431	3.912737958	1.06573955	3.671382897	0.000241242	0.017145013	9
TraesCS3B02G320200.2	81.07839907	23.36781635	5.957418561	3.922473486	8.76445E-05	0.008439673	9
TraesCS3B02G323600.3	24.71677265	21.31502145	3.476666024	6.130879786	8.73944E-10	5.16388E-07	9
TraesCS3B02G325100.1	139.66475	2.4644978	0.574415871	4.290441689	1.78318E-05	0.002617354	9
TraesCS3B02G325800.1	70.29658377	2.68692714	0.795199014	3.37893671	0.000727668	0.036913142	9
TraesCS3B02G328700.1	38.56968477	3.702200002	1.010997695	3.661927243	0.000250325	0.017600214	9
TraesCS3B02G329100.1	100.7672548	1.466973843	0.417812046	3.511085568	0.000446281	0.026327404	9
TraesCS3B02G333100.1	510.537395	3.950241667	0.838762747	4.709605524	2.48197E-06	0.000573039	9
TraesCS3B02G343100.1	151.5028348	2.629767468	0.636064642	4.134434294	3.5583E-05	0.004375917	9
TraesCS3B02G356500.1	338.1742172	3.64069486	0.921611553	3.950357229	7.80346E-05	0.007787601	9
TraesCS3B02G356700.1	701.1286752	5.5838783	1.279505735	4.364090091	1.27653E-05	0.002034493	9
TraesCS3B02G366700.1	27.67276906	2.415551331	0.644349435	3.748821992	0.000177667	0.01398838	9
TraesCS3B02G367900.1	22.24085166	7.617748356	2.087036136	3.650031844	0.000262208	0.018159973	9
TraesCS3B02G375100.1	339.8389613	4.283304341	0.977158948	4.383426412	1.16827E-05	0.001919245	9
TraesCS3B02G395000.2	594.5043628	2.453018604	0.688973011	3.560398688	0.000370292	0.023140145	9
TraesCS3B02G396200.1	19.9297856	2.860028187	0.730569494	3.914792787	9.04819E-05	0.008617063	9
TraesCS3B02G397300.1	56.85032403	1.912872827	0.428054495	4.46876005	7.86743E-06	0.001394364	9
TraesCS3B02G408500.1	125.5921222	3.792349293	0.993399608	3.817546598	0.000134785	0.011411469	9
TraesCS3B02G411600.1	20.56328843	3.784837763	0.881204625	4.295072512	1.74636E-05	0.002581051	9
TraesCS3B02G417500.1	68.93878642	3.756299743	0.782161093	4.802463047	1.56726E-06	0.000408185	9
TraesCS3B02G422200.1	45.18305228	1.840483075	0.548489385	3.355549125	0.000792076	0.039097422	9
TraesCS3B02G429900.1	12.19981193	3.238455402	0.889321666	3.641489379	0.000271065	0.018629143	9
TraesCS3B02G433000.1	241.0002298	1.513198136	0.377952894	4.003668599	6.23677E-05	0.00655329	9
TraesCS3B02G450500.1	79.64942348	1.840967163	0.50609161	3.637616445	0.000275173	0.018817307	9
TraesCS3B02G452800.6	33.82896116	22.86243387	2.887832868	7.916813374	2.43675E-15	4.42898E-12	9
TraesCS3B02G462500.2	37.46358535	8.076273222	2.211905204	3.65127457	0.000260942	0.018096402	9
TraesCS3B02G463000.2	143.7720591	23.94366322	3.272968826	7.315579371	2.56273E-13	3.47498E-10	9
TraesCS3B02G465200.1	260.975212	5.913240274	1.726624157	3.424740844	0.000615386	0.032959232	9
TraesCS3B02G469100.1	214.3526859	3.337404268	0.99701848	3.347384561	0.00081578	0.039648759	9
TraesCS3B02G472700.1	80.3437707	3.883146752	0.899882475	4.315170991	1.59479E-05	0.002390121	9
TraesCS3B02G473100.1	237.2095077	1.598529728	0.448139124	3.567038988	0.000361038	0.022761634	9
TraesCS3B02G480000.1	300.4710735	1.891148335	0.550602426	3.434689437	0.000593233	0.032175689	9
TraesCS3B02G481800.1	630.6541093	3.518799448	0.91208628	3.857967744	0.000114334	0.010152829	9
TraesCS3B02G493700.1	109.0453486	3.836776869	0.968319768	3.962303565	7.42301E-05	0.007499351	9
TraesCS3B02G496500.1	82.97200313	2.535178017	0.615307912	4.120177828	3.7858E-05	0.004567879	9
TraesCS3B02G506900.1	101.9695722	2.483934188	0.66573117	3.73113698	0.000190618	0.014669994	9
TraesCS3B02G525000.1	1565.722955	4.028851256	0.940844576	4.282164515	1.85084E-05	0.002698121	9
TraesCS3B02G526000.1	1398.090353	4.784203546	1.026654126	4.659995441	3.16216E-06	0.000696214	9
TraesCS3B02G528500.1	1055.324517	4.521919491	1.046112705	4.322593035	1.54206E-05	0.002335674	9
TraesCS3B02G529300.1	44.0052096	6.181324549	1.441550813	4.28796855	1.80315E-05	0.002633087	9
TraesCS3B02G529700.1	107.5487281	7.381425241	1.488591269	4.958664877	7.09793E-07	0.000209809	9
TraesCS3B02G536100.1	454.2859368	5.692727262	1.64637035	3.457744038	0.000544719	0.030393949	9
TraesCS3B02G536200.1	79.73372704	2.421313667	0.542307485	4.46483542	8.01303E-06	0.001411384	9
TraesCS3B02G584500.1	211.6005855	1.203960905	0.255558273	4.711101279	2.46382E-06	0.00057039	9
TraesCS3B02G584700.1	468.1263296	3.436492442	0.953351792	3.60464256	0.000312583	0.020418652	9
TraesCS3B02G597000.1	54.69885433	8.202810925	1.890824843	4.338218295	1.43642E-05	0.002218951	9
TraesCS3B02G597900.1	67.19419509	3.221684358	0.967903626	3.328517706	0.000873095	0.04141309	9
TraesCS3D02G022200.1	162.5807931	1.762790031	0.533335298	3.305219134	0.000949022	0.043658789	9
TraesCS3D02G025000.1	33.33728446	3.622954082	0.886580885	4.086433785	4.38054E-05	0.0050501	9
TraesCS3D02G040700.1	59.26049433	3.520468775	0.869333915	4.049616278	5.13017E-05	0.00567681	9
TraesCS3D02G041800.1	206.683173	2.839461958	0.790681026	3.591159855	0.00032921	0.021282532	9
TraesCS3D02G061900.1	643.0622764	8.329261593	1.606490671	5.184755655	2.16298E-07	7.33234E-05	9
TraesCS3D02G086900.2	295.3729671	25.35374774	3.334941526	7.602456459	2.90562E-14	4.86697E-11	9
TraesCS3D02G094200.1	710.5818206	2.549823942	0.576917479	4.41973772	9.88208E-06	0.001671656	9
TraesCS3D02G104800.1	34.87731493	2.214296684	0.627000441	3.531571175	0.000413099	0.024940691	9
TraesCS3D02G106900.1	18.25873172	7.279080179	1.630037973	4.46558933	7.98486E-06	0.001409329	9
TraesCS3D02G108500.1	182.2342288	4.073962469	1.182500819	3.445209005	0.000570618	0.031448782	9
TraesCS3D02G109000.1	134.1159091	2.315819652	0.633994587	3.652743572	0.000259453	0.018075028	9
TraesCS3D02G111100.1	47.13822813	4.014431775	1.021596981	3.929565034	8.50997E-05	0.008268103	9
TraesCS3D02G120500.3	157.0028861	22.55972804	3.121691323	7.226764502	4.94637E-13	6.03641E-10	9
TraesCS3D02G128500.1	82.61630666	4.748341892	1.088892611	4.360707241	1.29643E-05	0.002060469	9
TraesCS3D02G131100.5	43.01662441	6.917135218	2.100658054	3.292842071	0.000991802	0.045057258	9
TraesCS3D02G132500.1	91.12344817	3.086824244	0.898360169	3.436065345	0.000590229	0.03209476	9
TraesCS3D02G137000.1	29.53992004	5.30572415	1.490739398	3.559122511	0.000372096	0.023201947	9
TraesCS3D02G141400.2	33.18452006	41.12823592	6.55872202	6.270769793	3.59267E-10	2.32506E-07	9
TraesCS3D02G142600.1	18.85217735	2.729659361	0.779334185	3.502553093	0.000460822	0.026889463	9
TraesCS3D02G147800.1	15.75348543	3.10057201	0.909599888	3.408720748	0.000652683	0.034311421	9
TraesCS3D02G159800.2	462.0692235	4.575898238	1.264723045	3.618102997	0.00029677	0.019729105	9
TraesCS3D02G176100.1	15.14224247	4.15745333	1.175249679	3.537506459	0.000403924	0.024559173	9
TraesCS3D02G178300.2	52.24062015	34.59834429	6.558847575	5.275064543	1.32709E-07	4.86559E-05	9
TraesCS3D02G189900.1	9.832685112	5.398546861	1.478461539	3.651462496	0.000260751	0.018096402	9
TraesCS3D02G191600.2	11.79491738	34.31837795	6.559066323	5.232204747	1.675E-07	5.91275E-05	9
TraesCS3D02G191600.1	7.717546783	23.93009805	4.334102379	5.521350433	3.36404E-08	1.45876E-05	9
TraesCS3D02G195600.5	25.12824335	16.44114048	4.082773421	4.026953932	5.65041E-05	0.006133315	9
TraesCS3D02G203000.6	55.54840591	9.988413888	2.944989278	3.391663923	0.000694696	0.035755585	9
TraesCS3D02G209200.1	167.1227355	26.24576785	6.205722621	4.229284719	2.34435E-05	0.003254428	9
TraesCS3D02G218100.1	172.0565338	3.40618139	0.796669063	4.275528632	1.90684E-05	0.002756243	9
TraesCS3D02G228000.1	9.122665409	5.671924793	1.450972613	3.909050207	9.26597E-05	0.008756137	9
TraesCS3D02G230200.1	49.47787799	3.124159812	0.931322807	3.354540218	0.00079497	0.03916442	9
TraesCS3D02G231300.1	12.84017835	3.072649638	0.92554654	3.319821861	0.000900749	0.042116797	9
TraesCS3D02G246000.1	302.7494672	1.93658056	0.531416287	3.644187445	0.000268238	0.018464536	9
TraesCS3D02G257900.1	1073.865302	4.000845147	1.018192625	3.929359779	8.51723E-05	0.008268103	9
TraesCS3D02G259300.2	51.32029694	23.46018375	3.752346262	6.252137227	4.04873E-10	2.5811E-07	9
TraesCS3D02G260300.1	723.3036653	4.535445371	0.915588507	4.953584866	7.28586E-07	0.000214621	9
TraesCS3D02G260500.1	76.42038025	5.330566913	1.402581343	3.800540298	0.000144381	0.012092045	9
TraesCS3D02G276200.1	61.61159711	23.31006403	4.047359661	5.759326075	8.44504E-09	4.19434E-06	9
TraesCS3D02G290900.1	53.90179429	2.537827013	0.702214761	3.614032565	0.000301471	0.019917615	9
TraesCS3D02G293800.1	17.08863658	4.875873257	1.492173926	3.26763065	0.001084518	0.047591083	9
TraesCS3D02G298600.1	602.0343501	3.486836644	0.761311971	4.580036539	4.64895E-06	0.000945574	9
TraesCS3D02G305300.1	967.5530746	6.004546551	1.542096016	3.893756607	9.87037E-05	0.009140589	9
TraesCS3D02G305400.1	274.8695266	6.205980703	1.853335621	3.348546606	0.000812366	0.039648759	9
TraesCS3D02G307600.1	124.7303509	1.360233466	0.41161889	3.304594369	0.000951139	0.043683894	9
TraesCS3D02G309000.1	254.9030315	3.304042654	0.815573916	4.051187256	5.09584E-05	0.005646138	9
TraesCS3D02G320700.1	1445.392598	6.317263578	1.357093341	4.654995635	3.23988E-06	0.000706045	9
TraesCS3D02G336900.2	55.38117414	3.307188709	1.018993623	3.245544068	0.001172264	0.049797037	9
TraesCS3D02G336900.1	184.9088694	4.334122781	0.73056817	5.932537108	2.98289E-09	1.5926E-06	9
TraesCS3D02G341000.1	21.74508521	3.542195241	0.811162651	4.366812546	1.26073E-05	0.002020619	9
TraesCS3D02G346300.2	22.46329253	6.888553201	1.602590661	4.298385963	1.72046E-05	0.002551603	9
TraesCS3D02G350900.1	37.24061143	2.005153742	0.613334957	3.269263752	0.001078277	0.047480889	9
TraesCS3D02G356300.2	394.0003359	1.644123859	0.498332327	3.299251861	0.000969429	0.044309489	9
TraesCS3D02G367700.2	52.78809455	24.44221491	5.694005024	4.292622646	1.76575E-05	0.002596229	9
TraesCS3D02G368800.1	655.8217413	4.042154749	1.207456442	3.347660924	0.000814967	0.039648759	9
TraesCS3D02G381800.1	145.1174315	1.99907427	0.508534996	3.931045624	8.45772E-05	0.008243908	9
TraesCS3D02G394200.1	314.0598049	1.559646192	0.37322884	4.178793339	2.9306E-05	0.003781711	9
TraesCS3D02G433400.2	72.75326078	1.38974411	0.409329536	3.395171831	0.000685855	0.035487513	9
TraesCS3D02G437000.1	24.16524419	1.735091175	0.532554518	3.258053617	0.001121792	0.048448034	9
TraesCS3D02G439200.2	820.9172766	2.657301324	0.746426198	3.560032235	0.000370809	0.023155521	9
TraesCS3D02G439500.1	10.30108293	5.373250335	1.489447892	3.607545028	0.000309108	0.020312194	9
TraesCS3D02G444600.1	364.0796374	3.545769844	0.663671635	5.342656905	9.1594E-08	3.5405E-05	9
TraesCS3D02G449300.2	71.29358711	1.616483081	0.460768383	3.508233511	0.000451093	0.02648458	9
TraesCS3D02G474500.1	857.1575519	2.726776913	0.767769009	3.551558975	0.000382956	0.023647113	9
TraesCS3D02G475200.1	2294.672609	3.940941038	0.838125783	4.702087821	2.57515E-06	0.000588194	9
TraesCS3D02G476600.2	41.34629756	10.85015829	2.828424327	3.836114045	0.000124996	0.010807632	9
TraesCS3D02G477300.1	1486.002813	4.206856328	1.029299778	4.087105058	4.36789E-05	0.00504418	9
TraesCS3D02G478000.1	1202.107711	3.814610804	1.06838942	3.570431093	0.000356394	0.022535404	9
TraesCS3D02G478300.1	142.8528805	6.673600385	1.392631448	4.792079338	1.65062E-06	0.000425999	9
TraesCS3D02G524700.1	2296.648259	3.354122407	0.921731395	3.638936922	0.000273766	0.018769439	9
TraesCS4A02G007800.1	168.6517679	3.315221147	0.980309026	3.381812325	0.000720093	0.036637691	9
TraesCS4A02G043800.1	839.2488222	7.266610222	1.766606366	4.113315994	3.90016E-05	0.004672861	9
TraesCS4A02G043800.3	268.7008028	7.741134853	1.710254578	4.526305589	6.00238E-06	0.001144551	9
TraesCS4A02G050000.1	100.899749	2.232885102	0.590864062	3.779016606	0.000157449	0.01290531	9
TraesCS4A02G054900.1	78.07470222	1.843377868	0.469640809	3.925080262	8.67008E-05	0.008359486	9
TraesCS4A02G055900.1	345.8725031	3.123193725	0.640592055	4.875479959	1.08544E-06	0.000302036	9
TraesCS4A02G061900.1	1236.066585	3.847508584	1.025185283	3.752988506	0.000174739	0.013808735	9
TraesCS4A02G063700.4	105.9983157	24.64259387	3.221428529	7.649585781	2.01628E-14	3.44485E-11	9
TraesCS4A02G066900.1	88.25012862	24.52858534	3.235798642	7.580380627	3.44543E-14	5.55338E-11	9
TraesCS4A02G088300.2	19.93961815	31.3240179	6.560124401	4.774912179	1.79786E-06	0.000446831	9
TraesCS4A02G101800.1	92.0398688	2.735343174	0.819958876	3.335951662	0.000850079	0.04066448	9
TraesCS4A02G103700.1	158.712983	5.667274877	1.30615827	4.338888333	1.43205E-05	0.002218951	9
TraesCS4A02G106700.1	373.6344857	1.432012133	0.415999393	3.442341884	0.000576701	0.031722634	9
TraesCS4A02G107400.3	31.21476474	4.258235643	1.143006888	3.72546805	0.000194953	0.014843197	9
TraesCS4A02G109300.1	247.6442581	3.220266868	0.83338219	3.864093698	0.000111502	0.009971613	9
TraesCS4A02G116400.1	147.8062816	5.927772812	1.104349373	5.367660777	7.97644E-08	3.12567E-05	9
TraesCS4A02G117100.1	279.6814597	3.579505384	1.005165041	3.561112092	0.000369287	0.023111167	9
TraesCS4A02G123000.1	58.06097766	3.653252552	1.076256141	3.394408091	0.000687771	0.035543584	9
TraesCS4A02G142800.4	12.67102926	29.97123789	6.559059356	4.56944148	4.89026E-06	0.000979414	9
TraesCS4A02G149700.3	78.58291274	24.20130408	5.356341134	4.51825294	6.2352E-06	0.001181038	9
TraesCS4A02G151800.1	38.4635162	23.77427141	6.184666573	3.844066795	0.000121012	0.010580936	9
TraesCS4A02G169300.2	49.7038387	23.21612112	6.55921577	3.539465987	0.000400937	0.024447167	9
TraesCS4A02G193900.1	36.33279118	2.296773761	0.502770608	4.568233953	4.91851E-06	0.000979414	9
TraesCS4A02G196400.1	56.90895194	6.868641969	1.840175067	3.732602454	0.000189512	0.014637627	9
TraesCS4A02G204100.2	27.99342384	44.68878286	5.38270106	8.302297001	1.02118E-16	2.3577E-13	9
TraesCS4A02G206200.1	169.0717267	1.508979432	0.432562152	3.488468477	0.000485796	0.027964702	9
TraesCS4A02G213500.1	65.36593837	3.291447909	0.953870279	3.450624243	0.000559292	0.031004575	9
TraesCS4A02G214300.1	194.0328941	4.847701035	1.493134051	3.246661631	0.001167671	0.049626609	9
TraesCS4A02G230800.1	282.6577855	1.190912233	0.33612853	3.543026332	0.000395563	0.02424059	9
TraesCS4A02G235300.1	58.34342884	2.664035939	0.74322905	3.584407712	0.000337844	0.021634678	9
TraesCS4A02G243100.2	81.18915231	49.54820257	6.558837672	7.554418183	4.20736E-14	6.53488E-11	9
TraesCS4A02G244500.1	193.3274119	4.461019464	1.132230019	3.940029312	8.14717E-05	0.008036718	9
TraesCS4A02G246300.2	74.15406754	24.78396185	6.052842438	4.094598877	4.229E-05	0.004980585	9
TraesCS4A02G259300.1	166.6352421	3.897607876	1.160934125	3.35730322	0.000787067	0.038938084	9
TraesCS4A02G259600.1	190.3564204	3.023707676	0.837962908	3.60840277	0.000308088	0.020260754	9
TraesCS4A02G264400.1	59.93989663	3.102970016	0.706738835	4.39054692	1.13066E-05	0.001868234	9
TraesCS4A02G265100.1	57.44753823	1.984690539	0.534925573	3.710218093	0.000207081	0.015517616	9
TraesCS4A02G267300.1	130.0529752	2.188412725	0.66209764	3.3052719	0.000948843	0.043658789	9
TraesCS4A02G275300.1	75.53162113	20.61047432	3.563373466	5.783978165	7.29544E-09	3.70965E-06	9
TraesCS4A02G288400.1	331.1229362	1.973496534	0.584771339	3.374817477	0.000738647	0.037226918	9
TraesCS4A02G296300.1	898.0049605	3.440369975	0.92310504	3.726953951	0.000193808	0.014795558	9
TraesCS4A02G298700.1	422.6555941	2.164174869	0.536545707	4.033533096	5.49444E-05	0.006002279	9
TraesCS4A02G317900.1	18.43424857	3.308612503	0.790968936	4.182986656	2.87704E-05	0.003734555	9
TraesCS4A02G323400.1	64.47034134	4.843253427	1.165110018	4.156906518	3.22586E-05	0.004063495	9
TraesCS4A02G323800.1	137.9324902	1.541104494	0.468089137	3.292331252	0.000993605	0.0451008	9
TraesCS4A02G325700.1	23.32466128	3.264704882	0.900494132	3.625459363	0.000288448	0.019417636	9
TraesCS4A02G325800.1	58.09387478	5.355925916	1.351955451	3.961614203	7.44448E-05	0.007508286	9
TraesCS4A02G330000.1	37.03581289	4.707752515	1.15314382	4.082537177	4.45467E-05	0.00509461	9
TraesCS4A02G331100.1	703.4158408	4.894211769	1.431226143	3.419593608	0.000627148	0.033317601	9
TraesCS4A02G352900.1	525.0059652	3.087535926	0.777403672	3.971599359	7.13917E-05	0.00728639	9
TraesCS4A02G359900.1	114.3654917	4.15514429	1.183493185	3.510915267	0.000446567	0.026327404	9
TraesCS4A02G363400.1	42.0695525	1.865660985	0.388297312	4.8047229	1.54966E-06	0.000406768	9
TraesCS4A02G365600.1	100.7778324	5.566701459	1.381761444	4.02869937	5.60863E-05	0.006103474	9
TraesCS4A02G365700.1	772.6625564	7.233267088	1.749462184	4.134566129	3.55626E-05	0.004375917	9
TraesCS4A02G376600.2	7.692618696	22.08034089	5.371485959	4.110657844	3.94533E-05	0.004720366	9
TraesCS4A02G378100.1	52.0369297	1.241325758	0.344842133	3.599692847	0.000318593	0.020712443	9
TraesCS4A02G388700.1	11.39439381	7.906760811	2.106268662	3.753918459	0.000174092	0.013783079	9
TraesCS4A02G391600.1	329.8942958	2.350056374	0.558953685	4.204384792	2.61793E-05	0.003510304	9
TraesCS4A02G401300.1	292.5750762	3.795759583	1.143075401	3.320655469	0.000898063	0.042060714	9
TraesCS4A02G405300.1	302.3265701	4.944220936	1.428084313	3.462135177	0.000535908	0.03001998	9
TraesCS4A02G405500.1	38.26789754	5.00228224	1.358244323	3.68290311	0.000230593	0.01663735	9
TraesCS4A02G407500.1	71.80625804	2.478039943	0.757707087	3.270445775	0.001073781	0.047405084	9
TraesCS4A02G411600.2	37.92362182	23.05242437	6.559332961	3.514446439	0.000440672	0.026142226	9
TraesCS4A02G474800.1	27.13693542	10.94683563	2.568380538	4.262154873	2.02465E-05	0.002873053	9
TraesCS4A02G485400.2	256.8686517	6.526045715	1.560254969	4.182679015	2.88094E-05	0.003734555	9
TraesCS4A02G485900.1	59.22712799	4.90973284	1.171776844	4.189989642	2.78967E-05	0.003671965	9
TraesCS4A02G486000.1	64.70381182	6.026106256	0.86906717	6.933993671	4.09123E-12	4.26216E-09	9
TraesCS4A02G486100.1	9.971205426	2.915107142	0.893729164	3.261734381	0.001107328	0.04809082	9
TraesCS4A02G486800.1	138.5799221	2.78924718	0.734461338	3.797677341	0.000146058	0.01218474	9
TraesCS4A02G491600.1	120.4698233	5.912863933	1.286313288	4.596752585	4.29127E-06	0.000891936	9
TraesCS4B02G000800.1	58.91988621	3.103779114	0.910424527	3.409155862	0.000651642	0.034277833	9
TraesCS4B02G001500.1	177.4177904	1.318668857	0.345687468	3.814627316	0.000136389	0.011490269	9
TraesCS4B02G014700.1	167.0371131	2.781450825	0.681299953	4.082564242	4.45415E-05	0.00509461	9
TraesCS4B02G014700.2	167.0371131	2.781450825	0.681299953	4.082564242	4.45415E-05	0.00509461	9
TraesCS4B02G014800.1	101.7229317	4.297180113	0.918554902	4.678196268	2.89409E-06	0.000650608	9
TraesCS4B02G025100.1	9.644395676	7.527759011	2.255724815	3.337179677	0.000846332	0.040571701	9
TraesCS4B02G032900.1	201.953914	1.021325657	0.270360758	3.777640155	0.000158321	0.01290531	9
TraesCS4B02G037700.2	25.45954878	23.53865422	3.508759022	6.70854113	1.9658E-11	1.69626E-08	9
TraesCS4B02G037800.1	429.0065061	2.417036316	0.68378394	3.534795385	0.000408091	0.024689507	9
TraesCS4B02G046600.1	47.20347826	27.81122967	6.558685591	4.240366348	2.23155E-05	0.00312001	9
TraesCS4B02G050500.2	380.1200412	8.79748855	2.574151448	3.417626635	0.000631697	0.033496802	9
TraesCS4B02G050600.3	174.6168209	1.961314738	0.464720536	4.220417623	2.4385E-05	0.003338324	9
TraesCS4B02G051300.1	143.7200184	1.274613995	0.339312324	3.756462424	0.000172332	0.013707304	9
TraesCS4B02G062300.1	77.9427558	22.92363061	3.402015138	6.738250619	1.60305E-11	1.4415E-08	9
TraesCS4B02G070800.1	103.9974978	2.29039776	0.679692957	3.369753558	0.000752354	0.037585161	9
TraesCS4B02G071800.2	9.309314758	33.83527194	6.562840446	5.155583503	2.52842E-07	8.43723E-05	9
TraesCS4B02G092500.1	84.1186274	3.393664346	0.992371865	3.419750665	0.000626786	0.033317601	9
TraesCS4B02G092700.1	318.6652707	3.325847013	0.828498014	4.014308976	5.96202E-05	0.006376332	9
TraesCS4B02G098000.1	20.92717791	3.699933542	1.022103171	3.619921792	0.000294692	0.01968285	9
TraesCS4B02G121300.2	24.8073701	24.04861359	2.6410569	9.105677953	8.57293E-20	3.32887E-16	9
TraesCS4B02G128000.1	27.54092259	2.232733736	0.657123714	3.397737272	0.000679456	0.035306108	9
TraesCS4B02G133700.1	31.83316513	31.17191077	6.559503288	4.752175493	2.0124E-06	0.000488383	9
TraesCS4B02G148500.2	21.14089551	22.19362415	6.559882955	3.383234778	0.000716374	0.03649191	9
TraesCS4B02G164500.4	9.035360524	25.41478647	6.609479513	3.845202398	0.000120453	0.010543039	9
TraesCS4B02G197000.1	12.06766723	4.829712065	0.976568204	4.945596268	7.59111E-07	0.000220571	9
TraesCS4B02G197600.1	495.6443425	1.309524956	0.403338786	3.246712198	0.001167464	0.049626609	9
TraesCS4B02G198000.1	138.9102189	2.892543879	0.823611016	3.5120267	0.000444703	0.026308328	9
TraesCS4B02G201600.1	12.62841383	26.8243076	6.559678986	4.08927139	4.3273E-05	0.005035598	9
TraesCS4B02G202000.1	190.9376059	4.508240119	1.250182453	3.606065744	0.000310874	0.020381241	9
TraesCS4B02G214500.1	32.53483912	34.4386492	6.559614568	5.250102555	1.52015E-07	5.43347E-05	9
TraesCS4B02G220800.1	535.7557802	1.716584651	0.494292558	3.47281104	0.000515038	0.0292343	9
TraesCS4B02G231400.1	389.2177489	3.145040061	0.927153946	3.392144393	0.000693479	0.035746405	9
TraesCS4B02G237500.1	57.31684397	5.317218989	1.153837683	4.60829029	4.05994E-06	0.000852148	9
TraesCS4B02G237600.1	940.7185256	2.956526062	0.87708484	3.37085528	0.000749352	0.037522951	9
TraesCS4B02G240700.1	7.307252971	6.782808165	2.002658929	3.386901318	0.000706868	0.036180295	9
TraesCS4B02G264500.1	949.8753506	8.0268812	1.815374396	4.421611992	9.79673E-06	0.001660506	9
TraesCS4B02G272000.1	73.93965864	1.19412113	0.342292134	3.488602309	0.000485553	0.027964702	9
TraesCS4B02G300700.1	64.90214477	9.332171926	2.803172244	3.329146808	0.000871125	0.041359651	9
TraesCS4B02G305000.1	147.2601991	5.604430531	1.311093918	4.274621713	1.91462E-05	0.002762811	9
TraesCS4B02G307700.1	70.61023706	2.702278047	0.815761761	3.312582393	0.000924389	0.042916766	9
TraesCS4B02G308600.1	8.075713965	3.165012849	0.950311483	3.330500478	0.0008669	0.04126433	9
TraesCS4B02G315400.1	180.1118135	2.162890499	0.663848895	3.258106649	0.001121582	0.048448034	9
TraesCS4B02G318800.1	136.4359451	2.013174423	0.512635768	3.92710487	8.59745E-05	0.008324345	9
TraesCS4B02G323300.1	23.22928478	3.235930401	0.898548833	3.601284964	0.000316648	0.020648851	9
TraesCS4B02G323900.1	101.7466092	4.034227076	0.641568115	6.288072901	3.21431E-10	2.1452E-07	9
TraesCS4B02G326800.1	132.9400071	1.998350726	0.495471797	4.033227999	5.50159E-05	0.006002279	9
TraesCS4B02G328800.1	41.1572384	3.683315874	1.086508646	3.390047459	0.000698805	0.035858932	9
TraesCS4B02G329100.1	142.5739499	3.432915124	0.679747744	5.050278067	4.41167E-07	0.000140128	9
TraesCS4B02G330500.1	13.64461778	8.930616451	1.902563187	4.693992038	2.67924E-06	0.000608716	9
TraesCS4B02G344200.1	85.50099299	3.932471629	1.125846969	3.492900666	0.000477804	0.027635005	9
TraesCS4B02G356600.1	69.12928317	4.949500085	0.987382846	5.012746682	5.36585E-07	0.000166081	9
TraesCS4B02G356800.1	1756.060709	1.444126498	0.366615578	3.939075651	8.17961E-05	0.008050135	9
TraesCS4B02G377200.1	184.4900808	7.884121258	2.168676726	3.635452515	0.000277493	0.018888547	9
TraesCS4B02G378400.1	271.5889446	6.332223824	1.727538863	3.665459551	0.000246895	0.017416382	9
TraesCS4D02G002500.1	114.2196964	1.021856861	0.314102646	3.25325773	0.0011409	0.048926955	9
TraesCS4D02G003200.1	169.1104513	1.324136297	0.364203707	3.635702411	0.000277224	0.018885292	9
TraesCS4D02G014300.1	139.9392545	2.263082196	0.51799884	4.368894331	1.24877E-05	0.002005217	9
TraesCS4D02G015600.1	1442.741494	2.565071635	0.652318532	3.932237873	8.41587E-05	0.008216392	9
TraesCS4D02G023900.1	206.2981706	2.550415024	0.686768015	3.713648521	0.000204292	0.015362579	9
TraesCS4D02G035100.1	579.0836682	1.716721446	0.38944521	4.408120579	1.04271E-05	0.00174315	9
TraesCS4D02G035200.1	415.287238	4.07302701	0.913758463	4.457443815	8.29428E-06	0.001454922	9
TraesCS4D02G040200.3	54.15742495	35.82464681	6.558876868	5.462009355	4.70775E-08	1.96178E-05	9
TraesCS4D02G050400.2	115.8806124	8.14546805	1.780722931	4.574247857	4.77934E-06	0.000963114	9
TraesCS4D02G052400.1	190.4108143	26.11355532	3.78457887	6.899989726	5.20063E-12	5.22669E-09	9
TraesCS4D02G054100.1	82.45607941	4.098168599	0.94009247	4.359324994	1.30464E-05	0.002063515	9
TraesCS4D02G055600.1	214.8355779	1.924691311	0.589632454	3.264222139	0.001097651	0.047840769	9
TraesCS4D02G058900.1	12.73377586	3.308112921	0.857041796	3.859920178	0.000113424	0.010093088	9
TraesCS4D02G059400.1	111.6095181	1.588438085	0.331761493	4.787891653	1.68543E-06	0.000431075	9
TraesCS4D02G069600.1	102.3205368	1.913376693	0.557113224	3.43444853	0.000593761	0.032175689	9
TraesCS4D02G078600.1	60.58134732	1.762489652	0.38183487	4.615842582	3.91504E-06	0.000831955	9
TraesCS4D02G094200.1	63.8432703	4.065140927	1.105288916	3.677898936	0.000235163	0.016881548	9
TraesCS4D02G102300.1	71.03610322	46.24451643	6.558727734	7.050836429	1.77845E-12	1.97307E-09	9
TraesCS4D02G107200.1	385.1561396	1.29607585	0.338434163	3.829624761	0.000128339	0.01099646	9
TraesCS4D02G119400.1	40.62485996	3.223309288	0.718976003	4.483194533	7.35338E-06	0.001328055	9
TraesCS4D02G124700.1	73.20429578	3.048320284	0.647658686	4.706677064	2.51787E-06	0.000579307	9
TraesCS4D02G125800.1	88.40222563	3.522052175	0.999191494	3.52490208	0.000423639	0.025343008	9
TraesCS4D02G134200.1	41.42875652	1.651126245	0.497660387	3.317777123	0.000907369	0.042333624	9
TraesCS4D02G142900.1	34.08204388	3.097332608	0.90627209	3.417663019	0.000631613	0.033496802	9
TraesCS4D02G143400.1	41.97756139	24.43984605	6.558721321	3.726312624	0.000194301	0.014806771	9
TraesCS4D02G147700.4	43.21339695	24.42261228	6.242907713	3.912057234	9.15132E-05	0.008695893	9
TraesCS4D02G188600.1	227.9778302	3.210128415	0.975182641	3.291822762	0.000995403	0.045134456	9
TraesCS4D02G189200.1	195.0982218	4.549697863	0.899600296	5.057465946	4.24864E-07	0.000136445	9
TraesCS4D02G189500.1	20.49586976	3.500916999	0.831137914	4.212197446	2.52898E-05	0.003441914	9
TraesCS4D02G195600.1	295.5532404	2.902949569	0.836295736	3.471199772	0.000518138	0.029351783	9
TraesCS4D02G197300.1	11.00263753	7.579948822	2.025654882	3.741974454	0.00018258	0.014243914	9
TraesCS4D02G197900.1	193.5673582	2.809114146	0.743721175	3.777106586	0.000158661	0.012920649	9
TraesCS4D02G198100.1	410.03586	1.253905367	0.355626891	3.52590144	0.000422044	0.025300724	9
TraesCS4D02G198500.1	1098.153317	1.41322356	0.377360639	3.74502111	0.000180379	0.014097917	9
TraesCS4D02G202800.1	139.731544	3.488989606	1.029198592	3.390006199	0.00069891	0.035858932	9
TraesCS4D02G203200.1	22.30760625	2.649175783	0.721463837	3.671945353	0.000240711	0.017135826	9
TraesCS4D02G221100.1	565.8878273	1.446905485	0.437867091	3.3044399	0.000951664	0.043684487	9
TraesCS4D02G230700.2	40.63793201	32.56492741	6.566114744	4.959542847	7.06593E-07	0.000209588	9
TraesCS4D02G232700.2	308.2368304	3.129365835	0.809525468	3.865679289	0.00011078	0.009940682	9
TraesCS4D02G236800.1	83.67310841	6.797566475	1.92927963	3.523370262	0.000426096	0.025454299	9
TraesCS4D02G240400.1	40.00096333	3.740735454	1.073743189	3.483826946	0.000494299	0.028339587	9
TraesCS4D02G241100.1	13.17205698	4.658428489	1.264584897	3.683760972	0.000229818	0.016623556	9
TraesCS4D02G249000.1	402.4072666	3.46200185	0.565553276	6.12144248	9.2732E-10	5.42584E-07	9
TraesCS4D02G264500.1	980.9476175	5.23700349	1.320824743	3.964949563	7.34115E-05	0.007431129	9
[truncated: 14,523 more rows]

## Sheet: F_pseudograminearum_E-MTAB-4308
Transcript ID	baseMean	log2FoldChange	lfcSE	stat	pvalue	padj	Factor
[truncated: 10,759 more rows]

[truncated: 3 more sheets: F_graminearum_E-MTAB-4222, B_graminis_E-MTAB-4289, P_striiformis_E-MTAB-4289]
